# Supplementary material
Source: publisher figshare collection journal article supplement (https://gsajournals.figshare.com/ndownloader/files/39161198)
Supplement: Supplementary file 1 [file 39161198]

## Sheet: CEM_RNAseq_annots
Wormbase ID	Transcript	Gene Name	CEM_all.max_TPM/male.max_TPM	CEM_all.max_TPM/female.max_TPM	CEM_all.max_TPM/larvae_TPM	CEM_DL_TPM/male.max_TPM	CEM_DR_TPM/male.max_TPM	CEM_VL_TPM/male.max_TPM	CEM_VR_TPM/male.max_TPM	CEM_DL_TPM/female.max_TPM	CEM_DR_TPM/female.max_TPM	CEM_VL_TPM/female.max_TPM	CEM_VR_TPM/female.max_TPM	CEM_DL_TPM/larvae_TPM	CEM_DR_TPM/larvae_TPM	CEM_VL_TPM/larvae_TPM	CEM_VR_TPM/larvae_TPM	CEM_DL_TPM/CEM_non_DL.max_TPM	CEM_DR_TPM/CEM_non_DR.max_TPM	CEM_VL_TPM/CEM_non_VL.max_TPM	CEM_VR_TPM/CEM_non_VR.max_TPM	CEM_any/CEM_non_any.max	Coding	Prot_size	Max_prot_size	Housekeeping	TF	7TM_GPCRs	PFAM	GO_term	eggNOG	Phobius	NCoils	Psegs	CEM_DL_TPM	CEM_DR_TPM	CEM_VL_TPM	CEM_VR_TPM	CEM_all.max_TPM	CEM_non_DL.max_TPM	CEM_non_DR.max_TPM	CEM_non_VL.max_TPM	CEM_non_VR.max_TPM	larvae_TPM	male.max_TPM	female.max_TPM	male.1_TPM	male.2_TPM	male.3_TPM
WBGene00000001	Y110A7A.10	aap-1	0.1	0.03	0.88	0	0.1	0	0	0	0.03	0	0	0.02	0.88	0.01	0.03	0.02	32	0.01	0.03	32	protein	522 aa	522				SH2 [PF00017.23]	cell [GO:0005623]; dauer larval development [GO:0040024]; determination of adult lifespan [GO:0008340]; insulin receptor signaling pathway [GO:0008286]; phosphatidylinositol 3-kinase complex [GO:0005942]; phosphatidylinositol 3-kinase regulator activity [GO:0035014]; protein binding [GO:0005515]; protein kinase binding [GO:0019901]	3-Kinase, regulatory subunit [meNOG03593]; Adaptor for phosphoinositide 3-kinase [KOG4637]		NCoils: 0.04 (21/522)	SEG: 0.08 (43/522)	0.04	1.6	0.01	0.05	1.6	1.6	0.05	1.6	1.6	1.81	15.94	46.67	13.41	11.32	15.94
WBGene00000002	F27C8.1	aat-1	0	0.01	0.02	0	0	0	0	0	0	0	0.01	0.01	0.01	0.01	0.02	0.5	0.5	0.5	2	2	protein	493 aa	493				AA_permease [PF00324.20]; AA_permease_2 [PF13520.5]	amino acid transmembrane transport [GO:0003333]; amino acid transmembrane transporter activity [GO:0015171]; amino acid transport complex [GO:1990184]; membrane [GO:0016020]; plasma membrane [GO:0005886]	Amino acid transporters [COG0531]; Amino acid transporters [KOG1287]; Solute carrier family 7 (cationic amino acid transporter, y+ system), member protein [meNOG01463]	TM(12x)		SEG: 0.06 (32/493)	0.01	0.01	0.01	0.02	0.02	0.02	0.02	0.02	0.01	0.95	14.5	3.69	12.39	13.19	14.5
WBGene00000003	F07C3.7	aat-2	0.01	0.01	0.06	0.01	0.01	0	0.01	0.01	0.01	0	0.01	0.04	0.04	0.02	0.06	0.67	0.67	0.33	1.5	1.5	protein	483 aa	483				AA_permease [PF00324.20]; AA_permease_2 [PF13520.5]	amino acid transmembrane transport [GO:0003333]; amino acid transmembrane transporter activity [GO:0015171]; membrane [GO:0016020]	Amino acid transporters [COG0531]; Amino acid transporters [KOG1287]; Solute carrier family 7 (cationic amino acid transporter, y+ system), member protein [meNOG01463]	TM(12x)		SEG: 0.11 (52/483)	0.02	0.02	0.01	0.03	0.03	0.03	0.03	0.03	0.02	0.54	3.08	3.1	2.05	3.08	2.91
WBGene00000004	F52H2.2	aat-3	0	0	0.02	0	0	0	0	0	0	0	0	0.01	0.02	0.01	0.02	0.33	0.67	0.33	1.5	1.5	protein	493 aa	493				AA_permease [PF00324.20]; AA_permease_2 [PF13520.5]	amino acid transmembrane transport [GO:0003333]; amino acid transmembrane transporter activity [GO:0015171]; amino acid transport complex [GO:1990184]; lipid storage [GO:0019915]; membrane [GO:0016020]; plasma membrane [GO:0005886]	Amino acid transporters [COG0531]; Amino acid transporters [KOG1287]; Solute carrier family 7 (cationic amino acid transporter, y+ system), member protein [meNOG01463]	TM(13x)		SEG: 0.13 (63/493)	0.01	0.02	0.01	0.03	0.03	0.03	0.03	0.03	0.02	1.28	6.57	10.58	4.79	5.91	6.57
WBGene00000005	T13A10.10	aat-4	0.01	0.01	0.2	0	0.01	0	0.01	0	0.01	0	0.01	0.07	0.1	0.07	0.2	0.33	0.5	0.33	2	2	protein; ncRNA	526 aa	526				AA_permease [PF00324.20]; AA_permease_2 [PF13520.5]	amino acid transmembrane transport [GO:0003333]; amino acid transmembrane transporter activity [GO:0015171]; membrane [GO:0016020]	Amino acid transporters [COG0531]; Amino acid transporters [KOG1287]; Solute carrier family 7 (cationic amino acid transporter, y+ system), member protein [meNOG01463]	TM(13x)		SEG: 0.05 (25/526)	0.02	0.03	0.02	0.06	0.06	0.06	0.06	0.06	0.03	0.3	4.44	5.97	4.44	3.09	4.08
WBGene00000006	C55C2.5	aat-5	0.02	0.03	0.52	0.01	0.01	0.01	0.02	0.01	0.02	0.01	0.03	0.19	0.33	0.24	0.52	0.36	0.64	0.45	1.57	1.57	protein; ncRNA	537 aa	537				AA_permease [PF00324.20]; AA_permease_2 [PF13520.5]	amino acid transmembrane transport [GO:0003333]; amino acid transmembrane transporter activity [GO:0015171]; membrane [GO:0016020]	Amino acid transporters [COG0531]; Amino acid transporters [KOG1287]; Solute carrier family 7 (cationic amino acid transporter, y+ system), member protein [meNOG01463]	TM(12x)		SEG: 0.10 (56/537)	0.04	0.07	0.05	0.11	0.11	0.11	0.11	0.11	0.07	0.21	6.3	3.51	4.63	6.3	5.81
WBGene00000007	T11F9.4	aat-6	0.01	0.02	0.09	0	0	0	0.01	0.01	0.01	0.01	0.02	0.03	0.06	0.03	0.09	0.38	0.62	0.38	1.6	1.6	protein	513-523 aa	523				AA_permease [PF00324.20]; AA_permease_2 [PF13520.5]	amino acid transmembrane transport [GO:0003333]; amino acid transmembrane transporter activity [GO:0015171]; membrane [GO:0016020]	Amino acid transporters [COG0531]; Amino acid transporters [KOG1287]; Solute carrier family 7 (cationic amino acid transporter, y+ system), member protein [meNOG01463]	TM(12x)		SEG: 0.06 (33/523)	0.03	0.05	0.03	0.08	0.08	0.08	0.08	0.08	0.05	0.88	13.65	5.25	12.5	10.89	13.65
WBGene00000008	F54D12.3	aat-7	0.21	0.14	0.5	0.07	0.14	0.07	0.21	0.05	0.1	0.05	0.14	0.17	0.33	0.17	0.5	0.33	0.67	0.33	1.5	1.5	protein	500 aa	500				AA_permease [PF00324.20]; AA_permease_2 [PF13520.5]	amino acid transmembrane transport [GO:0003333]; amino acid transmembrane transporter activity [GO:0015171]; membrane [GO:0016020]	Amino acid transporters [COG0531]; Amino acid transporters [KOG1287]; Solute carrier family 7 (cationic amino acid transporter, y+ system), member 11 protein [meNOG03214]	TM(12x)		SEG: 0.06 (30/500)	0.01	0.02	0.01	0.03	0.03	0.03	0.03	0.03	0.02	0.06	0.14	0.21	0.05	0.14	0.05
WBGene00000009	F28F9.4	aat-8	0.16	0.12	0.3	0.05	0.11	0.05	0.16	0.04	0.08	0.04	0.12	0.1	0.2	0.1	0.3	0.33	0.67	0.33	1.5	1.5	protein	483 aa	483				AA_permease_2 [PF13520.5]	amino acid transmembrane transport [GO:0003333]; amino acid transmembrane transporter activity [GO:0015171]; determination of adult lifespan [GO:0008340]; membrane [GO:0016020]	Amino acid transporters [COG0531]; Amino acid transporters [KOG1287]	TM(12x)		SEG: 0.12 (59/483)	0.01	0.02	0.01	0.03	0.03	0.03	0.03	0.03	0.02	0.1	0.19	0.26	0.03	0.09	0.19
WBGene00000010	Y53H1C.1	aat-9	0.01	0	0.16	0	0	0	0.01	0	0	0	0	0.06	0.1	0.06	0.16	0.4	0.6	0.4	1.67	1.67	protein	527-541 aa	541				AA_permease [PF00324.20]; AA_permease_2 [PF13520.5]	amino acid transmembrane transport [GO:0003333]; amino acid transmembrane transporter activity [GO:0015171]; cell surface [GO:0009986]; membrane [GO:0016020]	Amino acid transporters [COG0531]; Amino acid transporters [KOG1287]; Solute carrier family 7 (cationic amino acid transporter, y+ system), member protein [meNOG01463]	TM(12x)		SEG: 0.05 (27/541)	0.02	0.03	0.02	0.05	0.05	0.05	0.05	0.05	0.03	0.31	8.52	33.52	8.05	7.45	8.52
WBGene00000012	C50F2.9	abf-1	0.14	3.5	85.14	0.14	0	0	0	3.5	0.02	0.02	0.04	85.14	0.55	0.39	0.89	96.05	0.01	0	0.01	96.05	protein	85 aa	85				Antimicrobial25 [PF16839.4]		Unnamed protein [LSE4166]	SigP		SEG: 0.08 (7/85)	37.46	0.24	0.17	0.39	37.46	0.39	37.46	37.46	37.46	0.44	269.52	10.71	269.52	153.37	221.45
WBGene00000013	C50F2.10	abf-2	0	0.03	1.06	0	0	0	0	0.01	0.02	0.01	0.03	0.39	0.61	0.44	1.06	0.37	0.58	0.42	1.73	1.73	protein	85 aa	85				Antimicrobial25 [PF16839.4]	defense response [GO:0006952]; defense response to Gram-negative bacterium [GO:0050829]	Unnamed protein [LSE4166]	SigP			0.07	0.11	0.08	0.19	0.19	0.19	0.19	0.19	0.11	0.18	51.91	6.36	51.91	40.28	41.73
WBGene00000014	F54B8.5	abf-3	1.32	0.84	0.9	0.46	0.79	0.57	1.32	0.3	0.5	0.36	0.84	0.32	0.54	0.39	0.9	0.35	0.59	0.43	1.68	1.68	protein	89 aa	89						Unnamed protein [LSE1105]	SigP		SEG: 0.13 (12/89)	0.13	0.22	0.16	0.37	0.37	0.37	0.37	0.37	0.22	0.41	0.28	0.44	0.27	0.24	0.28
WBGene00000015	Y38H6C.22	abf-4	0.73	0.46	0.51	0.27	0.43	0.3	0.73	0.17	0.27	0.19	0.46	0.19	0.3	0.21	0.51	0.36	0.59	0.41	1.69	1.69	protein	123 aa	123						Unnamed protein [LSE1105]	SigP		SEG: 0.13 (16/123)	0.08	0.13	0.09	0.22	0.22	0.22	0.22	0.22	0.13	0.43	0.3	0.48	0.15	0.13	0.3
WBGene00000016	T22H6.5	abf-5	0.01	0.02	0.03	0.01	0.01	0.01	0.01	0.01	0.01	0.01	0.02	0.01	0.02	0.01	0.03	0.4	0.6	0.4	1.67	1.67	protein	129 aa	129						Unnamed protein [LSE1105]	SigP			0.06	0.09	0.06	0.15	0.15	0.15	0.15	0.15	0.09	4.64	11.45	6.81	8.76	11.45	10.16
WBGene00000017	T22H6.7	abf-6	0.01	0.01	0.04	0	0	0	0.01	0	0.01	0	0.01	0.02	0.02	0.02	0.04	0.4	0.6	0.4	1.67	1.67	protein	195 aa	195							SigP		SEG: 0.59 (115/195)	0.04	0.06	0.04	0.1	0.1	0.1	0.1	0.1	0.06	2.6	15.28	9.84	15.28	13.7	11
WBGene00000018	M79.1	abl-1	0.01	0	0.03	0	0.01	0	0.01	0	0	0	0	0.01	0.02	0.01	0.03	0.33	0.67	0.33	1.5	1.5	protein	1209-1224 aa	1224				F_actin_bind [PF08919.9]; Pkinase [PF00069.24]; Pkinase_Tyr [PF07714.16]; SH2 [PF00017.23]; SH3_1 [PF00018.27]; SH3_2 [PF07653.16]	ATP binding [GO:0005524]; DNA damage checkpoint [GO:0000077]; apoptotic process [GO:0006915]; cytoplasm [GO:0005737]; defense response to Gram-negative bacterium [GO:0050829]; defense response to fungus [GO:0050832]; negative regulation of DNA damage response, signal transduction by p53 class mediator [GO:0043518]; negative regulation of apoptotic process [GO:0043066]; negative regulation of cell…	Protein tyrosine kinase [KOG4278]; Serine/threonine protein kinase [COG0515]; V-Abl Abelson murine leukemia viral oncogene homolog protein [meNOG09135]			SEG: 0.08 (100/1209)	0.01	0.02	0.01	0.03	0.03	0.03	0.03	0.03	0.02	1.14	3.86	8.27	3.86	3.82	3.76
WBGene00000019	C24F3.5	abt-1	0	0.08	0.07	0	0	0	0	0.04	0.04	0.04	0.08	0.03	0.03	0.03	0.07	0.5	0.5	0.5	2	2	protein	1479-1558 aa	1558				ABC_tran [PF00005.26]	ATP binding [GO:0005524]; ATPase activity [GO:0016887]; RNA interference [GO:0016246]		TM(12x); TM(13x)		SEG: 0.02 (36/1558)	0.01	0.01	0.01	0.02	0.02	0.02	0.02	0.02	0.01	0.3	22.06	0.26	20.04	15.25	22.06
WBGene00000020	F12B6.1	abt-2	0	0.01	0.02	0	0	0	0	0.01	0.01	0.01	0.01	0.02	0.02	0.02	0.02	1	1	1	1	1	protein	2109-2146 aa	2146				AAA_21 [PF13304.5]; ABC2_membrane_3 [PF12698.6]; ABC_tran [PF00005.26]	ATP binding [GO:0005524]; ATPase activity [GO:0016887]; regulation of cell proliferation [GO:0042127]; regulation of meiosis [GO:0040020]	ABC-type multidrug transport system, ATPase component [COG1131]; Atp-Binding cassette, sub-family A protein [meNOG02662]; Lipid exporter ABCA1 and related proteins, ABC superfamily [KOG0059]	TM(14x)		SEG: 0.04 (88/2146)	0	0.01	0.01	0.01	0.01	0.01	0.01	0.01	0.01	0.6	8.19	1.72	7.1	6.36	8.19
WBGene00000022	Y39D8C.1	abt-4	0	0	0.01	0	0	0	0	0	0	0	0	0.01	0.01	0.01	0.01	1	1	1	1	1	protein	1802 aa	1802				AAA_21 [PF13304.5]; ABC2_membrane_3 [PF12698.6]; ABC_tran [PF00005.26]	ATP binding [GO:0005524]; ATPase activity [GO:0016887]	ABC-type multidrug transport system, ATPase component [COG1131]; Atp-Binding cassette, sub-family A protein [meNOG02662]; Lipid exporter ABCA1 and related proteins, ABC superfamily [KOG0059]	TM(13x)		SEG: 0.01 (27/1802)	0	0	0	0.01	0.01	0.01	0.01	0.01	0	1.3	10.37	6.71	9.79	10.37	10.26
WBGene00000023	Y53C10A.9	abt-5	0	0.03	1	0	0	0	0	0.03	0.03	0.03	0.03	1	1	1	1	1	1	1	1	1	protein	1564 aa	1564				AAA_21 [PF13304.5]; AAA_23 [PF13476.5]; ABC2_membrane_3 [PF12698.6]; ABC_tran [PF00005.26]	ATP binding [GO:0005524]; ATPase activity [GO:0016887]	ABC-type multidrug transport system, ATPase component [COG1131]; Atp-Binding cassette, sub-family A protein [meNOG02662]; Lipid exporter ABCA1 and related proteins, ABC superfamily [KOG0059]	TM(14x)		SEG: 0.07 (103/1564)	0	0.01	0	0.01	0.01	0.01	0.01	0.01	0.01	0.01	17.64	0.39	15.07	12.49	17.64
WBGene00000024	AC3.3	abu-1	0.02	0.01	0	0.01	0.01	0.01	0.02	0	0.01	0	0.01	0	0	0	0	0.25	0.5	0.25	2	2	protein	425 aa	425					defense response [GO:0006952]; endoplasmic reticulum unfolded protein response [GO:0030968]; integral component of endoplasmic reticulum membrane [GO:0030176]	Uncharacterized protein [LSE0126]	SigP		SEG: 0.71 (300/425)	0.01	0.02	0.01	0.04	0.04	0.04	0.04	0.04	0.02	260.9	1.92	3.04	0.33	1.92	0.63
WBGene00000025	F19G12.7	abu-2	0.25	0.27	1	0.08	0.17	0.08	0.25	0.09	0.18	0.09	0.27	0.33	0.67	0.33	1	0.33	0.67	0.33	1.5	1.5	protein	572 aa	572					endoplasmic reticulum unfolded protein response [GO:0030968]	Uncharacterized protein [LSE0126]	SigP		SEG: 0.66 (378/572)	0.01	0.02	0.01	0.03	0.03	0.03	0.03	0.03	0.02	0.03	0.12	0.11	0.04	0.12	0.11
WBGene00000026	F31A3.1	abu-3	1.5	0.47	1.12	0.5	0.83	0.67	1.5	0.16	0.26	0.21	0.47	0.38	0.62	0.5	1.12	0.33	0.56	0.44	1.8	1.8	protein	242 aa	242					endoplasmic reticulum unfolded protein response [GO:0030968]	Uncharacterized protein [LSE0126]	SigP		SEG: 0.63 (153/242)	0.03	0.05	0.04	0.09	0.09	0.09	0.09	0.09	0.05	0.08	0.06	0.19	0.06	0.05	0.06
WBGene00000027	Y5H2A.3	abu-4	0.32	0.27	0.23	0.11	0.16	0.11	0.32	0.09	0.14	0.09	0.27	0.08	0.12	0.08	0.23	0.33	0.5	0.33	2	2	protein	339 aa	339				DUF1096 [PF06493.10]	endoplasmic reticulum unfolded protein response [GO:0030968]		SigP		SEG: 0.57 (193/339)	0.02	0.03	0.02	0.06	0.06	0.06	0.06	0.06	0.03	0.26	0.19	0.22	0.19	0.11	0.04
WBGene00000028	Y105C5A.4	abu-5	0.86	0.75	1.2	0.29	0.43	0.29	0.86	0.25	0.38	0.25	0.75	0.4	0.6	0.4	1.2	0.33	0.5	0.33	2	2	protein	335 aa	335				DUF1096 [PF06493.10]	determination of adult lifespan [GO:0008340]; endoplasmic reticulum unfolded protein response [GO:0030968]	Uncharacterized protein [LSE0126]	SigP		SEG: 0.51 (170/335)	0.02	0.03	0.02	0.06	0.06	0.06	0.06	0.06	0.03	0.05	0.07	0.08	0.04	0.05	0.07
WBGene00000029	C03A7.7	abu-6	0.08	0.05	0	0.08	0.03	0.02	0.05	0.05	0.02	0.01	0.03	0	0	0	0	1.6	0.38	0.25	0.62	1.6	protein	388 aa	388					defense response [GO:0006952]; endoplasmic reticulum unfolded protein response [GO:0030968]	Uncharacterized protein [LSE0126]	SigP		SEG: 0.73 (284/388)	0.08	0.03	0.02	0.05	0.08	0.05	0.08	0.08	0.08	105.57	0.99	1.77	0.1	0.99	0.21
WBGene00000030	C03A7.8	abu-7	0.07	0.04	0	0.03	0.03	0.03	0.07	0.02	0.02	0.02	0.04	0	0	0	0	0.5	0.5	0.5	2	2	protein	438 aa	438					defense response [GO:0006952]; endoplasmic reticulum unfolded protein response [GO:0030968]	Uncharacterized protein [LSE0126]	SigP		SEG: 0.69 (302/438)	0.02	0.02	0.02	0.04	0.04	0.04	0.04	0.04	0.02	10.04	0.58	0.92	0.07	0.58	0.41
WBGene00000031	C03A7.14	abu-8	0.03	0.03	0	0.03	0.01	0	0.01	0.03	0.01	0	0.01	0	0	0	0	2	0.33	0.17	0.5	2	protein	445 aa	445					defense response [GO:0006952]; endoplasmic reticulum unfolded protein response [GO:0030968]	Uncharacterized protein [LSE0126]	SigP		SEG: 0.71 (315/445)	0.06	0.02	0.01	0.03	0.06	0.03	0.06	0.06	0.06	101.31	2.34	2.18	0.48	2.34	1.63
WBGene00000032	R09F10.2	abu-9	0.25	0.1	0	0.1	0.15	0.1	0.25	0.04	0.06	0.04	0.1	0	0	0	0	0.4	0.6	0.4	1.67	1.67	protein	378 aa	378						Uncharacterized protein [LSE0126]	SigP		SEG: 0.67 (254/378)	0.02	0.03	0.02	0.05	0.05	0.05	0.05	0.05	0.03	19.64	0.2	0.49	0.1	0.2	0.07
WBGene00000033	F35A5.3	abu-10	0.03	0.04	0.02	0.01	0.02	0.02	0.03	0.01	0.02	0.02	0.04	0	0.01	0.01	0.02	0.25	0.5	0.5	2	2	protein	375 aa	375				DUF1096 [PF06493.10]	endoplasmic reticulum unfolded protein response [GO:0030968]	Uncharacterized protein [LSE0126]	SigP		SEG: 0.67 (252/375)	0.01	0.02	0.02	0.04	0.04	0.04	0.04	0.04	0.02	2.01	1.26	0.99	0.42	1.26	0.35
WBGene00000034	T01D1.6	abu-11	0.02	0.02	0.03	0	0.01	0.01	0.02	0	0.01	0.01	0.02	0.01	0.02	0.02	0.03	0.25	0.5	0.5	2	2	protein	395 aa	395					defense response [GO:0006952]; determination of adult lifespan [GO:0008340]; endoplasmic reticulum unfolded protein response [GO:0030968]		SigP		SEG: 0.68 (270/395)	0.01	0.02	0.02	0.04	0.04	0.04	0.04	0.04	0.02	1.29	2.65	2.32	1.21	2.65	2.09
WBGene00000035	W09B12.1	ace-1	0.01	0.01	0.07	0	0	0	0.01	0	0.01	0.01	0.01	0.02	0.04	0.04	0.07	0.25	0.5	0.5	2	2	protein	620 aa	620				Abhydrolase_3 [PF07859.12]; COesterase [PF00135.27]	acetylcholine catabolic process [GO:0006581]; acetylcholine catabolic process in synaptic cleft [GO:0001507]; acetylcholinesterase activity [GO:0003990]; cell [GO:0005623]; cholinesterase activity [GO:0004104]; extracellular region [GO:0005576]; identical protein binding [GO:0042802]; membrane [GO:0016020]; regulation of locomotion [GO:0040012]	Acetylcholinesterase [meNOG00737]; Acetylcholinesterase/Butyrylcholinesterase [KOG4389]; Carboxylesterase type B [COG2272]	SigP			0.01	0.02	0.02	0.04	0.04	0.04	0.04	0.04	0.02	0.56	7.59	2.76	6.79	7.47	7.59
WBGene00000036	Y44E3A.2	ace-2	0	0	1	0	0	0	0	0	0	0	0	0.5	0.5	0.5	1	0.5	0.5	0.5	2	2	protein	629 aa	629				Abhydrolase_3 [PF07859.12]; COesterase [PF00135.27]	acetylcholine catabolic process [GO:0006581]; acetylcholine catabolic process in synaptic cleft [GO:0001507]; acetylcholinesterase activity [GO:0003990]; cell [GO:0005623]; cholinesterase activity [GO:0004104]; protein homodimerization activity [GO:0042803]; regulation of locomotion [GO:0040012]; synaptic transmission, cholinergic [GO:0007271]	Acetylcholinesterase [meNOG00737]; Acetylcholinesterase/Butyrylcholinesterase [KOG4389]; Carboxylesterase type B [COG2272]	TM(2x)		SEG: 0.05 (32/629)	0.01	0.01	0.01	0.02	0.02	0.02	0.02	0.02	0.01	0.02	8.53	4.29	7.21	8.53	6.47
WBGene00000037	Y48B6A.8	ace-3	0.01	0.03	1	0.01	0.01	0.01	0.01	0.02	0.02	0.02	0.03	0.5	0.5	0.5	1	0.5	0.5	0.5	2	2	protein	607 aa	607				Abhydrolase_3 [PF07859.12]; COesterase [PF00135.27]	acetylcholine catabolic process [GO:0006581]; acetylcholine catabolic process in synaptic cleft [GO:0001507]; acetylcholinesterase activity [GO:0003990]; cholinesterase activity [GO:0004104]; hatching [GO:0035188]; multicellular organismal movement [GO:0050879]; nematode larval development [GO:0002119]; protein dimerization activity [GO:0046983]; regulation of backward locomotion [GO:0043058]	Acetylcholinesterase [meNOG00737]; Acetylcholinesterase/Butyrylcholinesterase [KOG4389]; Carboxylesterase type B [COG2272]	SigP+TM(1x)		SEG: 0.08 (49/607)	0.01	0.01	0.01	0.02	0.02	0.02	0.02	0.02	0.01	0.02	1.47	0.58	1.12	1.47	1.26
WBGene00000038	Y48B6A.7	ace-4	0.06	0.08	0.14	0.06	0.03	0.03	0.06	0.08	0.04	0.04	0.08	0.14	0.07	0.07	0.14	1	0.5	0.5	1	1	protein	602 aa	602				Abhydrolase_3 [PF07859.12]; COesterase [PF00135.27]	cholinesterase activity [GO:0004104]; reproduction [GO:0000003]	Acetylcholinesterase [meNOG00737]; Acetylcholinesterase/Butyrylcholinesterase [KOG4389]; Carboxylesterase type B [COG2272]	SigP+TM(1x)		SEG: 0.07 (44/602)	0.02	0.01	0.01	0.02	0.02	0.02	0.02	0.02	0.02	0.14	0.34	0.25	0.19	0.31	0.34
WBGene00000039	C42D8.5	acn-1	0.02	0.02	0.09	0	0.01	0.01	0.02	0.01	0.02	0.01	0.02	0.02	0.06	0.04	0.09	0.25	0.75	0.5	1.33	1.33	protein	332-906 aa	906				EB [PF01683.17]; Peptidase_M2 [PF01401.17]	hermaphrodite genitalia development [GO:0040035]; locomotion [GO:0040011]; membrane [GO:0016020]; metallopeptidase activity [GO:0008237]; molting cycle, collagen and cuticulin-based cuticle [GO:0018996]; nematode larval development [GO:0002119]; oviposition [GO:0018991]; peptidyl-dipeptidase activity [GO:0008241]; positive regulation of multicellular organism growth [GO:0040018]; proteolysis [GO:…	Angiotensin I-converting enzymes - M2 family peptidases [KOG3690]; Angiotensin-Converting enzyme [meNOG02668]	SigP+TM(1x)		SEG: 0.21 (70/332)	0.01	0.03	0.02	0.04	0.04	0.04	0.04	0.04	0.03	0.47	2.48	1.74	1.85	1.65	2.48
WBGene00000040	ZK455.1	aco-1	0.06	0.03	0.11	0.01	0	0.06	0	0	0	0.03	0	0.01	0	0.11	0	0.13	0.01	7.44	0.01	7.44	protein	887 aa	887	Housekeeping			Aconitase [PF00330.19]; Aconitase_C [PF00694.18]	aconitate hydratase activity [GO:0003994]; cellular iron ion homeostasis [GO:0006879]; cytosol [GO:0005829]; metabolic process [GO:0008152]; tricarboxylic acid metabolic process [GO:0072350]	Aconitase A [COG1048]; Iron-Responsive element-binding protein [meNOG01683]; RNA-binding translational regulator IRP (aconitase superfamily) [KOG0452]			SEG: 0.03 (23/887)	0.36	0.04	2.68	0.03	2.68	2.68	2.68	0.36	2.68	25.27	42.77	95.09	35.75	42.77	41.02
WBGene00000041	F54H12.1	aco-2	0	0	0	0	0	0	0	0	0	0	0	0	0	0	0	1.11	0.9	0.3	0.7	1.11	protein	665-777 aa	777				Aconitase [PF00330.19]; Aconitase_C [PF00694.18]	4 iron, 4 sulfur cluster binding [GO:0051539]; RNA interference [GO:0016246]; aconitate hydratase activity [GO:0003994]; determination of adult lifespan [GO:0008340]; embryo development ending in birth or egg hatching [GO:0009792]; hermaphrodite genitalia development [GO:0040035]; locomotion [GO:0040011]; metabolic process [GO:0008152]; mitochondrion [GO:0005739]; nematode larval development [GO:…	Aconitase 2, mitochondrial [meNOG04277]; Aconitase A [COG1048]; Aconitase/homoaconitase (aconitase superfamily) [KOG0453]			SEG: 0.03 (26/777)	0.1	0.09	0.03	0.07	0.1	0.09	0.1	0.1	0.1	37.92	422.05	364.13	363.75	421.09	422.05
WBGene00000042	K11G12.2	acr-2	0.02	0.08	0.2	0.01	0.01	0.01	0.02	0.04	0.04	0.04	0.08	0.1	0.1	0.1	0.2	0.5	0.5	0.5	2	2	protein	575 aa	575				Neur_chan_LBD [PF02931.22]; Neur_chan_memb [PF02932.15]	acetylcholine receptor activity [GO:0015464]; acetylcholine-activated cation-selective channel activity [GO:0004889]; extracellular ligand-gated ion channel activity [GO:0005230]; integral component of membrane [GO:0016021]; ion channel activity [GO:0005216]; ion transport [GO:0006811]; membrane [GO:0016020]; neuron projection [GO:0043005]; postsynaptic membrane [GO:0045211]; synaptic transmissio…	Acetylcholine receptor [KOG3645]; Acetylcholine receptor [meNOG05899]	SigP+TM(4x)		SEG: 0.10 (60/575)	0.01	0.01	0.01	0.02	0.02	0.02	0.02	0.02	0.01	0.1	0.8	0.26	0.61	0.8	0.74
WBGene00000043	K11G12.7	acr-3	0.05	0.1	0.15	0.02	0.03	0.02	0.05	0.03	0.07	0.03	0.1	0.05	0.1	0.05	0.15	0.33	0.67	0.33	1.5	1.5	protein	487 aa	487				Neur_chan_LBD [PF02931.22]; Neur_chan_memb [PF02932.15]	acetylcholine receptor activity [GO:0015464]; acetylcholine-activated cation-selective channel activity [GO:0004889]; extracellular ligand-gated ion channel activity [GO:0005230]; integral component of membrane [GO:0016021]; ion channel activity [GO:0005216]; ion transport [GO:0006811]; membrane [GO:0016020]; postsynaptic membrane [GO:0045211]; transport [GO:0006810]	Acetylcholine receptor [KOG3645]; Acetylcholine receptor [meNOG05899]	SigP+TM(6x)		SEG: 0.08 (37/487)	0.01	0.02	0.01	0.03	0.03	0.03	0.03	0.03	0.02	0.2	0.66	0.29	0.27	0.39	0.66
WBGene00000044	K03F8.2	acr-5	0.05	0.1	1	0.02	0.03	0.02	0.05	0.03	0.06	0.03	0.1	0.33	0.67	0.33	1	0.33	0.67	0.33	1.5	1.5	protein	598 aa	598				Neur_chan_LBD [PF02931.22]; Neur_chan_memb [PF02932.15]	extracellular ligand-gated ion channel activity [GO:0005230]; integral component of membrane [GO:0016021]; ion transport [GO:0006811]; membrane [GO:0016020]; transport [GO:0006810]	Acetylcholine receptor [KOG3645]; Nicotinic acetylcholine receptor [meNOG00170]	TM(4x)		SEG: 0.04 (22/598)	0.01	0.02	0.01	0.03	0.03	0.03	0.03	0.03	0.02	0.03	0.58	0.31	0.41	0.5	0.58
WBGene00000045	ZK973.5	acr-6	0.14	0.2	1	0.05	0.1	0.05	0.14	0.07	0.13	0.07	0.2	0.33	0.67	0.33	1	0.33	0.67	0.33	1.5	1.5	protein	551 aa	551				Neur_chan_LBD [PF02931.22]; Neur_chan_memb [PF02932.15]	acetylcholine-activated cation-selective channel activity [GO:0004889]; embryo development ending in birth or egg hatching [GO:0009792]; extracellular ligand-gated ion channel activity [GO:0005230]; integral component of membrane [GO:0016021]; ion channel activity [GO:0005216]; ion transport [GO:0006811]; membrane [GO:0016020]; nematode larval development [GO:0002119]; postsynaptic membrane [GO:0…		SigP+TM(4x)		SEG: 0.06 (34/551)	0.01	0.02	0.01	0.03	0.03	0.03	0.03	0.03	0.02	0.03	0.21	0.15	0.11	0.2	0.21
WBGene00000046	T09A5.3	acr-7	0.05	0.1	1	0.02	0.04	0.02	0.05	0.03	0.07	0.03	0.1	0.33	0.67	0.33	1	0.33	0.67	0.33	1.5	1.5	protein	538 aa	538				Neur_chan_LBD [PF02931.22]; Neur_chan_memb [PF02932.15]	extracellular ligand-gated ion channel activity [GO:0005230]; integral component of membrane [GO:0016021]; ion transport [GO:0006811]; membrane [GO:0016020]; transport [GO:0006810]	Acetylcholine receptor [KOG3646]; Nicotinic acetylcholine receptor [meNOG00170]	TM(6x)		SEG: 0.07 (35/538)	0.01	0.02	0.01	0.03	0.03	0.03	0.03	0.03	0.02	0.03	0.57	0.29	0.57	0.54	0.42
WBGene00000047	ZC504.2	acr-8	0.03	0.03	0.07	0.01	0.02	0.01	0.03	0.01	0.02	0.01	0.03	0.02	0.05	0.02	0.07	0.33	0.67	0.33	1.5	1.5	protein	537 aa	537				Neur_chan_LBD [PF02931.22]; Neur_chan_memb [PF02932.15]	acetylcholine-activated cation-selective channel activity [GO:0004889]; extracellular ligand-gated ion channel activity [GO:0005230]; integral component of membrane [GO:0016021]; ion channel activity [GO:0005216]; ion transport [GO:0006811]; membrane [GO:0016020]; postsynaptic membrane [GO:0045211]; transport [GO:0006810]	Acetylcholine receptor [KOG3645]; Nicotinic acetylcholine-activated cation-selective channel [meNOG00409]	TM(4x)		SEG: 0.05 (27/537)	0.01	0.02	0.01	0.03	0.03	0.03	0.03	0.03	0.02	0.42	1.03	0.87	0.85	1.03	0.55
WBGene00000048	C40C9.2	acr-9	0.07	0.11	0.2	0.04	0.04	0.04	0.07	0.05	0.05	0.05	0.11	0.1	0.1	0.1	0.2	0.5	0.5	0.5	2	2	protein	534 aa	534				Neur_chan_LBD [PF02931.22]; Neur_chan_memb [PF02932.15]	acetylcholine-activated cation-selective channel activity [GO:0004889]; extracellular ligand-gated ion channel activity [GO:0005230]; integral component of membrane [GO:0016021]; ion channel activity [GO:0005216]; ion transport [GO:0006811]; membrane [GO:0016020]; postsynaptic membrane [GO:0045211]; transport [GO:0006810]	Acetylcholine receptor [KOG3646]; Nicotinic acetylcholine receptor [meNOG00170]	SigP+TM(4x)	NCoils: 0.04 (21/534)	SEG: 0.07 (38/534)	0.01	0.01	0.01	0.02	0.02	0.02	0.02	0.02	0.01	0.1	0.28	0.19	0.27	0.28	0.22
WBGene00000049	R02E12.8	acr-10	0.25	0.17	1	0.08	0.17	0.08	0.25	0.06	0.11	0.06	0.17	0.33	0.67	0.33	1	0.33	0.67	0.33	1.5	1.5	protein	557 aa	557				Neur_chan_LBD [PF02931.22]; Neur_chan_memb [PF02932.15]	acetylcholine-activated cation-selective channel activity [GO:0004889]; extracellular ligand-gated ion channel activity [GO:0005230]; integral component of membrane [GO:0016021]; ion channel activity [GO:0005216]; ion transport [GO:0006811]; locomotion [GO:0040011]; membrane [GO:0016020]; postsynaptic membrane [GO:0045211]; transport [GO:0006810]		SigP+TM(4x)		SEG: 0.08 (46/557)	0.01	0.02	0.01	0.03	0.03	0.03	0.03	0.03	0.02	0.03	0.12	0.18	0.04	0.12	0.12
WBGene00000050	D2092.3	acr-11	0.03	0.03	0.1	0.01	0.02	0.01	0.03	0.01	0.02	0.01	0.03	0.03	0.07	0.03	0.1	0.33	0.67	0.33	1.5	1.5	protein	461 aa	461				Neur_chan_LBD [PF02931.22]; Neur_chan_memb [PF02932.15]	acetylcholine receptor activity [GO:0015464]; acetylcholine-activated cation-selective channel activity [GO:0004889]; extracellular ligand-gated ion channel activity [GO:0005230]; integral component of membrane [GO:0016021]; ion channel activity [GO:0005216]; ion transport [GO:0006811]; membrane [GO:0016020]; postsynaptic membrane [GO:0045211]; synapse [GO:0045202]; synaptic transmission [GO:0007…	Acetylcholine receptor [KOG3646]; Nicotinic acetylcholine receptor [meNOG00170]	TM(4x)		SEG: 0.06 (28/461)	0.01	0.02	0.01	0.03	0.03	0.03	0.03	0.03	0.02	0.29	1.02	1.04	0.68	0.57	1.02
WBGene00000051	R01E6.4	acr-12	0.01	0.04	0.03	0.01	0.01	0.01	0.01	0.02	0.02	0.02	0.04	0.01	0.01	0.01	0.03	0.5	0.5	0.5	2	2	protein	573 aa	573				Neur_chan_LBD [PF02931.22]; Neur_chan_memb [PF02932.15]	acetylcholine-activated cation-selective channel activity [GO:0004889]; extracellular ligand-gated ion channel activity [GO:0005230]; integral component of membrane [GO:0016021]; ion channel activity [GO:0005216]; ion transport [GO:0006811]; membrane [GO:0016020]; postsynaptic membrane [GO:0045211]; transport [GO:0006810]	Acetylcholine receptor [KOG3645]; Nicotinic acetylcholine-activated cation-selective channel [meNOG00409]	SigP+TM(4x)		SEG: 0.02 (11/573)	0.01	0.01	0.01	0.02	0.02	0.02	0.02	0.02	0.01	0.76	1.42	0.56	0.9	1.42	1.09
WBGene00000053	T05C12.2	acr-14	0.09	0.38	1	0.03	0.06	0.03	0.09	0.12	0.25	0.12	0.38	0.33	0.67	0.33	1	0.33	0.67	0.33	1.5	1.5	protein	500 aa	500				Neur_chan_LBD [PF02931.22]; Neur_chan_memb [PF02932.15]	acetylcholine-activated cation-selective channel activity [GO:0004889]; extracellular ligand-gated ion channel activity [GO:0005230]; integral component of membrane [GO:0016021]; ion channel activity [GO:0005216]; ion transport [GO:0006811]; locomotion [GO:0040011]; membrane [GO:0016020]; postsynaptic membrane [GO:0045211]; transport [GO:0006810]	Acetylcholine receptor [KOG3646]; Nicotinic acetylcholine receptor [meNOG00170]	SigP+TM(4x)	NCoils: 0.04 (21/500)	SEG: 0.03 (13/500)	0.01	0.02	0.01	0.03	0.03	0.03	0.03	0.03	0.02	0.03	0.33	0.08	0.33	0.21	0.32
WBGene00000054	F25G6.4	acr-15	0	0.02	0.01	0	0	0	0	0.01	0.01	0.01	0.02	0.01	0.01	0	0.01	0.67	0.67	0.33	1.5	1.5	protein	479 aa	479				Neur_chan_LBD [PF02931.22]; Neur_chan_memb [PF02932.15]	acetylcholine receptor activity [GO:0015464]; acetylcholine-activated cation-selective channel activity [GO:0004889]; extracellular ligand-gated ion channel activity [GO:0005230]; integral component of membrane [GO:0016021]; ion channel activity [GO:0005216]; ion transport [GO:0006811]; membrane [GO:0016020]; postsynaptic membrane [GO:0045211]; synapse [GO:0045202]; synaptic transmission [GO:0007…	Acetylcholine receptor [KOG3646]; Nicotinic acetylcholine receptor [meNOG00170]	SigP+TM(4x)		SEG: 0.07 (32/479)	0.02	0.02	0.01	0.03	0.03	0.03	0.03	0.03	0.02	3.16	6.08	1.64	5.58	6.08	5.98
WBGene00000055	F25G6.3	acr-16	0.01	0.02	0.07	0	0.01	0	0.01	0.01	0.01	0.01	0.02	0.03	0.04	0.03	0.07	0.4	0.6	0.4	1.67	1.67	protein	480-498 aa	498				Neur_chan_LBD [PF02931.22]; Neur_chan_memb [PF02932.15]	acetylcholine-activated cation-selective channel activity [GO:0004889]; cell projection [GO:0042995]; extracellular ligand-gated ion channel activity [GO:0005230]; integral component of membrane [GO:0016021]; ion channel activity [GO:0005216]; ion transmembrane transport [GO:0034220]; ion transport [GO:0006811]; locomotion [GO:0040011]; membrane [GO:0016020]; postsynaptic membrane [GO:0045211]; s…		SigP+TM(3x); SigP+TM(4x)		SEG: 0.03 (12/480)	0.02	0.03	0.02	0.05	0.05	0.05	0.05	0.05	0.03	0.76	4.55	2.26	4.08	4.35	4.55
WBGene00000056	F53E10.2	acr-17	0.12	0.07	0.44	0.04	0.07	0.05	0.12	0.02	0.04	0.03	0.07	0.12	0.25	0.19	0.44	0.29	0.57	0.43	1.75	1.75	protein	446-515 aa	515				Neur_chan_LBD [PF02931.22]; Neur_chan_memb [PF02932.15]	extracellular ligand-gated ion channel activity [GO:0005230]; integral component of membrane [GO:0016021]; ion transport [GO:0006811]; membrane [GO:0016020]; transport [GO:0006810]	Acetylcholine receptor [KOG3645]; Cholinergic receptor, nicotinic, alpha [meNOG03373]	SigP+TM(3x); SigP+TM(4x)		SEG: 0.03 (13/515)	0.02	0.04	0.03	0.07	0.07	0.07	0.07	0.07	0.04	0.16	0.57	0.97	0.53	0.57	0.46
WBGene00000057	F28F8.1	acr-18	0.01	0.02	0.1	0.01	0.01	0	0.01	0.01	0.01	0.01	0.02	0.07	0.07	0.03	0.1	0.67	0.67	0.33	1.5	1.5	protein	510 aa	510				Neur_chan_LBD [PF02931.22]; Neur_chan_memb [PF02932.15]	extracellular ligand-gated ion channel activity [GO:0005230]; integral component of membrane [GO:0016021]; ion transport [GO:0006811]; membrane [GO:0016020]; transport [GO:0006810]	Acetylcholine receptor [KOG3645]	SigP+TM(4x)		SEG: 0.05 (25/510)	0.02	0.02	0.01	0.03	0.03	0.03	0.03	0.03	0.02	0.29	3.21	1.52	2.89	3.21	2.91
WBGene00000058	C31H5.3	acr-19	0.04	0.11	1	0.02	0.03	0.02	0.04	0.04	0.07	0.04	0.11	0.4	0.6	0.4	1	0.4	0.6	0.4	1.67	1.67	protein	554-560 aa	560				Neur_chan_LBD [PF02931.22]; Neur_chan_memb [PF02932.15]	acetylcholine-activated cation-selective channel activity [GO:0004889]; extracellular ligand-gated ion channel activity [GO:0005230]; integral component of membrane [GO:0016021]; ion channel activity [GO:0005216]; ion transport [GO:0006811]; membrane [GO:0016020]; postsynaptic membrane [GO:0045211]; transport [GO:0006810]	Acetylcholine receptor [KOG3646]; Nicotinic acetylcholine receptor [meNOG00170]	SigP+TM(4x)		SEG: 0.05 (29/560)	0.02	0.03	0.02	0.05	0.05	0.05	0.05	0.05	0.03	0.05	1.16	0.46	0.86	1.16	1.01
WBGene00000059	R06A4.10	acr-20	0.07	0.05	0.36	0.03	0.05	0.03	0.07	0.02	0.03	0.02	0.05	0.14	0.27	0.14	0.36	0.38	0.75	0.38	1.33	1.33	protein	511-556 aa	556				Neur_chan_LBD [PF02931.22]; Neur_chan_memb [PF02932.15]	extracellular ligand-gated ion channel activity [GO:0005230]; integral component of membrane [GO:0016021]; ion transport [GO:0006811]; membrane [GO:0016020]; transport [GO:0006810]	Acetylcholine receptor [KOG3645]; Nicotinic acetylcholine-activated cation-selective channel [meNOG00409]	SigP+TM(4x); TM(4x)		SEG: 0.10 (58/556)	0.03	0.06	0.03	0.08	0.08	0.08	0.08	0.08	0.06	0.22	1.13	1.73	1.13	1.09	1.05
WBGene00000060	F27B3.2	acr-21	0.1	0.13	1.33	0.02	0.05	0.02	0.1	0.03	0.06	0.03	0.13	0.33	0.67	0.33	1.33	0.25	0.5	0.25	2	2	protein	469 aa	469				Neur_chan_LBD [PF02931.22]; Neur_chan_memb [PF02932.15]	acetylcholine-activated cation-selective channel activity [GO:0004889]; extracellular ligand-gated ion channel activity [GO:0005230]; integral component of membrane [GO:0016021]; ion channel activity [GO:0005216]; ion transport [GO:0006811]; membrane [GO:0016020]; postsynaptic membrane [GO:0045211]; transport [GO:0006810]	Acetylcholine receptor [KOG3645]; Cholinergic receptor, nicotinic, alpha [meNOG03373]	TM(3x)			0.01	0.02	0.01	0.04	0.04	0.04	0.04	0.04	0.02	0.03	0.41	0.31	0.32	0.41	0.34
WBGene00000061	F48E3.7	lgc-11	0.05	0.12	0.18	0.02	0.04	0.02	0.05	0.04	0.08	0.04	0.12	0.06	0.12	0.06	0.18	0.33	0.67	0.33	1.5	1.5	protein	434 aa	434				Neur_chan_LBD [PF02931.22]; Neur_chan_memb [PF02932.15]	extracellular ligand-gated ion channel activity [GO:0005230]; integral component of membrane [GO:0016021]; ion transport [GO:0006811]; membrane [GO:0016020]; transport [GO:0006810]	Acetylcholine receptor [KOG3645]; Cholinergic receptor, nicotinic, alpha [meNOG03373]	SigP+TM(4x)		SEG: 0.07 (31/434)	0.01	0.02	0.01	0.03	0.03	0.03	0.03	0.03	0.02	0.17	0.57	0.26	0.32	0.57	0.42
WBGene00000062	F59B1.9	acr-23	0.12	0.21	1	0.04	0.08	0.04	0.12	0.07	0.14	0.07	0.21	0.33	0.67	0.33	1	0.33	0.67	0.33	1.5	1.5	protein	545 aa	545				Neur_chan_LBD [PF02931.22]; Neur_chan_memb [PF02932.15]	embryo development ending in birth or egg hatching [GO:0009792]; extracellular ligand-gated ion channel activity [GO:0005230]; integral component of membrane [GO:0016021]; ion transport [GO:0006811]; membrane [GO:0016020]; transport [GO:0006810]	Acetylcholine receptor [KOG3645]; Nicotinic acetylcholine-activated cation-selective channel [meNOG00409]	SigP+TM(4x)		SEG: 0.04 (24/545)	0.01	0.02	0.01	0.03	0.03	0.03	0.03	0.03	0.02	0.03	0.25	0.14	0.2	0.2	0.25
WBGene00000063	T04C12.6	act-1	0.07	0.14	0.18	0.03	0.07	0.01	0.05	0.06	0.14	0.03	0.09	0.08	0.18	0.04	0.12	0.47	1.53	0.2	0.65	1.53	protein	376 aa	376	Housekeeping			Actin [PF00022.18]	actin cytoskeleton organization [GO:0030036]; cytokinesis [GO:0000910]; cytoskeleton [GO:0005856]; embryo development ending in birth or egg hatching [GO:0009792]; growth [GO:0040007]; hermaphrodite genitalia development [GO:0040035]; inductive cell migration [GO:0040039]; locomotion [GO:0040011]; muscle organ development [GO:0007517]; nematode larval development [GO:0002119]; receptor-mediated e…	Actin and related proteins [COG5277]; Actin and related proteins [KOG0676]; Actins are highly proteins that are involved in various types of cell motility and are ubiquitously expressed in all eukaryotic cells [meNOG00307]				120.39	254.46	50.54	166.5	254.46	254.46	166.5	254.46	254.46	1424.14	3479.69	1879.21	2136.35	3479.69	3046.79
WBGene00000064	T04C12.5	act-2	0.22	0.18	0.34	0.02	0.22	0	0.12	0.02	0.18	0	0.1	0.04	0.34	0	0.19	0.11	1.79	0.01	0.56	1.79	protein	376 aa	376	Housekeeping			Actin [PF00022.18]	ATP binding [GO:0005524]; ATPase activity [GO:0016887]; actin cytoskeleton organization [GO:0030036]; actin filament [GO:0005884]; actin filament-based process [GO:0030029]; cell cortex [GO:0005938]; cytokinesis [GO:0000910]; cytokinesis, initiation of separation [GO:0007108]; cytoplasm [GO:0005737]; embryo development [GO:0009790]; embryo development ending in birth or egg hatching [GO:0009792];…	Actin and related proteins [COG5277]; Actin and related proteins [KOG0676]; Actins are highly proteins that are involved in various types of cell motility and are ubiquitously expressed in all eukaryotic cells [meNOG00307]				34.2	319.55	3.54	178.25	319.55	319.55	178.25	319.55	319.55	932.3	1481.8	1727.71	1175.64	1481.8	1312.17
WBGene00000065	T04C12.4	act-3	0.1	0.15	0.05	0.02	0.08	0	0.1	0.03	0.12	0	0.15	0.01	0.04	0	0.05	0.17	0.79	0.01	1.27	1.27	protein	376 aa	376	Housekeeping			Actin [PF00022.18]	actin filament-based process [GO:0030029]; cytokinesis [GO:0000910]; embryo development [GO:0009790]; embryo development ending in birth or egg hatching [GO:0009792]; growth [GO:0040007]; hermaphrodite genitalia development [GO:0040035]; inductive cell migration [GO:0040039]; locomotion [GO:0040011]; mitotic cytokinesis [GO:0000281]; nematode larval development [GO:0002119]; receptor-mediated end…	Actin and related proteins [COG5277]; Actin and related proteins [KOG0676]; Actins are highly proteins that are involved in various types of cell motility and are ubiquitously expressed in all eukaryotic cells [meNOG00307]				29.18	131.94	1.59	167.98	167.98	167.98	167.98	167.98	131.94	3113.97	1732.78	1108.07	1329.39	1732.78	1624.14
WBGene00000066	M03F4.2	act-4	0.01	0.01	0.05	0	0	0	0.01	0	0	0	0.01	0.01	0	0	0.05	0.14	0.02	0.02	7.37	7.37	protein	332-376 aa	376	Housekeeping			Actin [PF00022.18]	actin cytoskeleton organization [GO:0030036]; apoptotic process [GO:0006915]; cytokinesis [GO:0000910]; cytoskeleton [GO:0005856]; embryo development ending in birth or egg hatching [GO:0009792]; hermaphrodite genitalia development [GO:0040035]; inductive cell migration [GO:0040039]; locomotion [GO:0040011]; membrane raft [GO:0045121]; nematode larval development [GO:0002119]; reproduction [GO:00…	Actin and related proteins [COG5277]; Actin and related proteins [KOG0676]; Actins are highly proteins that are involved in various types of cell motility and are ubiquitously expressed in all eukaryotic cells [meNOG00307]				1.38	0.23	0.25	10.17	10.17	10.17	10.17	10.17	1.38	218.86	2031.5	1314	1593.36	2031.5	2003.27
WBGene00000067	T25C8.2	act-5	3.26	2.57	0.45	1.68	3.26	1.44	0.84	1.32	2.57	1.14	0.66	0.23	0.45	0.2	0.12	0.52	1.94	0.44	0.26	1.94	protein	375 aa	375	Housekeeping			Actin [PF00022.18]	apoptotic process [GO:0006915]; embryo development ending in birth or egg hatching [GO:0009792]; hermaphrodite genitalia development [GO:0040035]; microvillar actin bundle [GO:0097516]; microvillus assembly [GO:0030033]; nematode larval development [GO:0002119]; receptor-mediated endocytosis [GO:0006898]; reproduction [GO:0000003]; terminal web [GO:1990357]; tube formation [GO:0035148]	Actin and related proteins [COG5277]; Actin and related proteins [KOG0676]; Actins are highly proteins that are involved in various types of cell motility and are ubiquitously expressed in all eukaryotic cells [meNOG00307]			SEG: 0.05 (19/375)	557.03	1080.75	479.13	277.76	1080.75	1080.75	557.03	1080.75	1080.75	2409.66	331.98	420.77	227.64	331.98	265.89
WBGene00000068	F17C8.1	acy-1	0	0.01	0.03	0	0	0	0	0.01	0.01	0.01	0.01	0.03	0.03	0.03	0.03	1	1	1	1	1	protein	1253 aa	1253				Guanylate_cyc [PF00211.19]	adenylate cyclase activity [GO:0004016]; adenylate cyclase-modulating G-protein coupled receptor signaling pathway [GO:0007188]; cell death [GO:0008219]; chemotaxis [GO:0006935]; cyclic nucleotide biosynthetic process [GO:0009190]; defense response [GO:0006952]; intracellular signal transduction [GO:0035556]; nematode larval development [GO:0002119]; phosphorus-oxygen lyase activity [GO:0016849];…	Adenylate cyclase [meNOG01903]; Adenylate cyclase, family 3 (some proteins contain HAMP domain) [COG2114]; Adenylyl cyclase [KOG3618]	TM(12x)		SEG: 0.09 (114/1253)	0	0.01	0	0.01	0.01	0.01	0.01	0.01	0.01	0.34	6.08	1.85	5.13	6.08	5.44
WBGene00000069	C10F3.3	acy-2	0.01	0.05	0.03	0.01	0.01	0.01	0.01	0.05	0.05	0.05	0.05	0.03	0.03	0.03	0.03	1	1	1	1	1	protein	1080 aa	1080				Guanylate_cyc [PF00211.19]	adenylate cyclase activity [GO:0004016]; adenylate cyclase-modulating G-protein coupled receptor signaling pathway [GO:0007188]; cyclic nucleotide biosynthetic process [GO:0009190]; intracellular signal transduction [GO:0035556]; locomotion [GO:0040011]; nematode larval development [GO:0002119]; phosphorus-oxygen lyase activity [GO:0016849]; plasma membrane [GO:0005886]	Adenylate cyclase [meNOG03459]; Adenylate cyclase, family 3 (some proteins contain HAMP domain) [COG2114]; Adenylate/guanylate cyclase [KOG3619]	TM(11x)		SEG: 0.07 (71/1080)	0	0.01	0.01	0.01	0.01	0.01	0.01	0.01	0.01	0.35	0.69	0.21	0.54	0.65	0.69
WBGene00000070	C44F1.5	acy-3	0	0	0.02	0	0	0	0	0	0	0	0	0.02	0.02	0.02	0.02	1	1	1	1	1	protein	1261 aa	1261				Guanylate_cyc [PF00211.19]	adenylate cyclase-activating G-protein coupled receptor signaling pathway [GO:0007189]; cAMP-mediated signaling [GO:0019933]; calcium- and calmodulin-responsive adenylate cyclase activity [GO:0008294]; cyclic nucleotide biosynthetic process [GO:0009190]; intracellular signal transduction [GO:0035556]; lipid storage [GO:0019915]; negative regulation of protein kinase C signaling [GO:0090038]; phos…	Adenylate cyclase [meNOG03459]; Adenylate cyclase, family 3 (some proteins contain HAMP domain) [COG2114]; Adenylate/guanylate cyclase [KOG3619]	TM(11x)		SEG: 0.03 (42/1261)	0	0.01	0	0.01	0.01	0.01	0.01	0.01	0.01	0.52	4.54	2.24	4.13	3.64	4.54
WBGene00000071	T01C2.1	acy-4	0	0.01	0.12	0	0	0	0	0.01	0.01	0.01	0.01	0.12	0.12	0.12	0.12	1	1	1	1	1	protein	1013 aa	1013				AC_N [PF16214.4]; Guanylate_cyc [PF00211.19]	G-protein coupled receptor signaling pathway [GO:0007186]; adenylate cyclase activity [GO:0004016]; cyclic nucleotide biosynthetic process [GO:0009190]; intracellular signal transduction [GO:0035556]; phosphorus-oxygen lyase activity [GO:0016849]; plasma membrane [GO:0005886]; positive regulation of oocyte maturation [GO:1900195]	Adenylate cyclase [meNOG03459]; Adenylate cyclase, family 3 (some proteins contain HAMP domain) [COG2114]; Adenylate/guanylate cyclase [KOG3619]	TM(11x)		SEG: 0.05 (46/1013)	0	0.01	0.01	0.01	0.01	0.01	0.01	0.01	0.01	0.08	4.1	1.67	4.03	4.1	3.81
WBGene00000072	F39C12.2	add-1	0.02	0.03	0.53	0.01	0.01	0.01	0.02	0.01	0.02	0.01	0.03	0.18	0.35	0.24	0.53	0.33	0.67	0.44	1.5	1.5	protein	679-732 aa	732				Aldolase_II [PF00596.20]	actin filament binding [GO:0051015]; barbed-end actin filament capping [GO:0051016]; long-term memory [GO:0007616]; memory [GO:0007613]; postsynaptic density [GO:0014069]; receptor localization to synapse [GO:0097120]; regulation of actin cytoskeleton reorganization [GO:2000249]; short-term memory [GO:0007614]	Cytoskeletal protein Adducin [KOG3699]; Protein involved in barbed-end actin filament capping [meNOG07436]; Ribulose-5-phosphate 4-epimerase and related epimerases and aldolases [COG0235]	TM(1x)		SEG: 0.03 (23/732)	0.03	0.06	0.04	0.09	0.09	0.09	0.09	0.09	0.06	0.17	4.21	2.77	3.67	4.21	3.68
WBGene00000073	F57F5.4	add-2	0.01	0.01	0.01	0.01	0	0	0.01	0.01	0	0	0.01	0	0	0	0.01	0.9	0.6	0.4	1.11	1.11	protein	294-611 aa	611				Aldolase_II [PF00596.20]		Cytoskeletal protein Adducin [KOG3699]; Protein involved in barbed-end actin filament capping [meNOG07436]; Ribulose-5-phosphate 4-epimerase and related epimerases and aldolases [COG0235]			SEG: 0.04 (22/611)	0.09	0.06	0.04	0.1	0.1	0.1	0.1	0.1	0.09	18.18	12.49	18	10.01	12.49	12.34
WBGene00000074	C04A11.4	adm-2	0.01	0.01	0.43	0.01	0	0	0	0.01	0	0	0	0.43	0.07	0.07	0.07	6	0.17	0.17	0.17	6	protein	952 aa	952				ADAM_CR [PF08516.11]; Disintegrin [PF00200.22]; Reprolysin [PF01421.18]; Reprolysin_2 [PF13574.5]; Reprolysin_3 [PF13582.5]; Reprolysin_4 [PF13583.5]; Reprolysin_5 [PF13688.5]	metalloendopeptidase activity [GO:0004222]; metallopeptidase activity [GO:0008237]; proteolysis [GO:0006508]	ADAM metallopeptidase domain-containing protein [meNOG00900]; Meltrins, fertilins and related Zn-dependent metalloproteinases of the ADAMs family [KOG3607]	TM(1x)		SEG: 0.07 (63/952)	0.06	0.01	0.01	0.01	0.06	0.01	0.06	0.06	0.06	0.14	4.29	11.21	3.75	4.1	4.29
WBGene00000075	ZK154.7	adm-4	0.02	0	0.01	0.02	0.01	0.01	0.01	0	0	0	0	0.01	0	0	0	1.5	0.33	0.33	0.67	1.5	protein	686 aa	686				ADAM17_MPD [PF16698.4]; Disintegrin [PF00200.22]; Reprolysin [PF01421.18]; Reprolysin_2 [PF13574.5]; Reprolysin_3 [PF13582.5]; Reprolysin_4 [PF13583.5]; Reprolysin_5 [PF13688.5]	metallopeptidase activity [GO:0008237]; reproduction [GO:0000003]	ADAM metallopeptidase domain 17 [meNOG04963]; Tumor necrosis factor-alpha-converting enzyme (TACE/ADAM17) and related metalloproteases [KOG3658]	SigP+TM(1x)			0.03	0.01	0.01	0.02	0.03	0.02	0.03	0.03	0.03	4.12	1.77	11.77	1.77	1.72	1.76
WBGene00000079	H15N14.1	adr-1	0.01	0.01	0.23	0	0.01	0	0.01	0	0	0	0.01	0.08	0.14	0.1	0.23	0.36	0.61	0.43	1.65	1.65	protein	100-964 aa	964				A_deamin [PF02137.17]; dsrm [PF00035.25]	RNA binding [GO:0003723]; RNA processing [GO:0006396]; adenosine deaminase activity [GO:0004000]; cytosolic ribosome [GO:0022626]; molting cycle, collagen and cuticulin-based cuticle [GO:0018996]; nematode larval development [GO:0002119]; nucleus [GO:0005634]; oogenesis [GO:0048477]	Adenosine deaminase, RNA-specific [meNOG09688]; tRNA-specific adenosine deaminase 1 [KOG2777]			SEG: 0.15 (15/100)	0.1	0.17	0.12	0.28	0.28	0.28	0.28	0.28	0.17	1.22	24.92	52.04	24.92	18.46	22.33
WBGene00000080	T20H4.4	adr-2	0	0	0.01	0	0	0	0	0	0	0	0	0.01	0	0	0	2.33	0.29	0.14	0.43	2.33	protein	495 aa	495				A_deamin [PF02137.17]; dsrm [PF00035.25]	RNA binding [GO:0003723]; RNA processing [GO:0006396]; adenosine deaminase activity [GO:0004000]; cytoplasm [GO:0005737]; nucleus [GO:0005634]	Adenosine deaminase, RNA-specific [meNOG09688]; tRNA-specific adenosine deaminase 1 [KOG2777]			SEG: 0.02 (12/495)	0.07	0.02	0.01	0.03	0.07	0.03	0.07	0.07	0.07	6.96	22.78	62.06	21.9	19.13	22.78
WBGene00000081	Y50D7A.7	ads-1	0	0	0	0	0	0	0	0	0	0	0	0	0	0	0	1.5	0.33	0.33	0.67	1.5	protein	597 aa	597				FAD-oxidase_C [PF02913.18]; FAD_binding_4 [PF01565.22]	UDP-N-acetylmuramate dehydrogenase activity [GO:0008762]; alkylglycerone-phosphate synthase activity [GO:0008609]; catalytic activity [GO:0003824]; embryo development ending in birth or egg hatching [GO:0009792]; flavin adenine dinucleotide binding [GO:0050660]; lipid biosynthetic process [GO:0008610]; nematode larval development [GO:0002119]; oxidation-reduction process [GO:0055114]; oxidoreduct…			NCoils: 0.04 (21/597)		0.03	0.01	0.01	0.02	0.03	0.02	0.03	0.03	0.03	25.03	58.51	83.44	51.67	58.51	57.21
WBGene00000082	C02B4.1	adt-1	0.04	0.03	1	0.04	0.04	0.04	0.04	0.03	0.03	0.03	0.03	1	1	1	1	1	1	1	1	1	protein	1461 aa	1461				Pep_M12B_propep [PF01562.18]; Reprolysin [PF01421.18]; Reprolysin_3 [PF13582.5]; Reprolysin_5 [PF13688.5]; TSP_1 [PF00090.18]	metalloendopeptidase activity [GO:0004222]; metallopeptidase activity [GO:0008237]; proteolysis [GO:0006508]; zinc ion binding [GO:0008270]	Disintegrin metalloproteinases with thrombospondin repeats [KOG3538]; Sema domain, seven thrombospondin repeats (type 1 and type 1-like), transmembrane domain and short cytoplasmic domain, protein [meNOG00779]	SigP	NCoils: 0.01 (21/1461)	SEG: 0.04 (62/1461)	0	0.01	0	0.01	0.01	0.01	0.01	0.01	0.01	0.01	0.26	0.3	0.13	0.24	0.26
WBGene00000083	F08C6.1	adt-2	0	0.01	0.02	0	0	0	0	0	0.01	0	0.01	0.01	0.01	0.01	0.02	0.33	0.67	0.44	1.5	1.5	protein	125-1020 aa	1020				Pep_M12B_propep [PF01562.18]; Reprolysin [PF01421.18]; Reprolysin_5 [PF13688.5]; TSP_1 [PF00090.18]	body morphogenesis [GO:0010171]; collagen fibril organization [GO:0030199]; determination of adult lifespan [GO:0008340]; engulfment of apoptotic cell [GO:0043652]; locomotion [GO:0040011]; metalloendopeptidase activity [GO:0004222]; metallopeptidase activity [GO:0008237]; molting cycle, collagen and cuticulin-based cuticle [GO:0018996]; nematode larval development [GO:0002119]; positive regulati…		SigP		SEG: 0.02 (17/975)	0.03	0.06	0.04	0.09	0.09	0.09	0.09	0.09	0.06	5.29	18.61	11.68	13.9	18.61	14.3
WBGene00000084	D2030.10	aex-1	0.03	0.03	0.23	0.03	0.01	0	0.01	0.03	0.01	0	0.01	0.23	0.07	0.03	0.1	2.33	0.29	0.14	0.43	2.33	protein	921-1009 aa	1009				C2 [PF00168.29]	defecation [GO:0030421]; intracellular [GO:0005622]; locomotion [GO:0040011]; male mating behavior [GO:0060179]; oviposition [GO:0018991]; positive regulation of acetylcholine secretion, neurotransmission [GO:0014057]; protein binding [GO:0005515]; protein catabolic process [GO:0030163]; protein localization to synapse [GO:0035418]; signal transducer activity [GO:0004871]; synaptic vesicle exocyt…	Protein involved in granuloma formation [meNOG06676]; Synaptic vesicle protein BAIAP3, involved in vesicle priming/regulation [KOG1328]	TM(1x)		SEG: 0.04 (35/921)	0.07	0.02	0.01	0.03	0.07	0.03	0.07	0.07	0.07	0.3	2.62	2.72	2.47	2.26	2.62
WBGene00000085	T14B1.2	aex-2	0.03	0.06	0.09	0.01	0.02	0.02	0.03	0.01	0.04	0.03	0.06	0.02	0.07	0.05	0.09	0.25	0.75	0.5	1.33	1.33	protein	321 aa	321			7TM_GPCRs	7tm_1 [PF00001.20]	G-protein coupled receptor activity [GO:0004930]; G-protein coupled receptor signaling pathway [GO:0007186]; integral component of membrane [GO:0016021]; protein catabolic process [GO:0030163]	Unnamed protein [LSE0893]	TM(7x)		SEG: 0.10 (33/321)	0.01	0.03	0.02	0.04	0.04	0.04	0.04	0.04	0.03	0.44	1.23	0.67	1.08	1.23	1.09
WBGene00000086	C02H7.3	aex-3	0.01	0.03	0.33	0.01	0	0	0.01	0.03	0.01	0.01	0.02	0.33	0.08	0.08	0.17	2	0.25	0.25	0.5	2	protein	1408-1409 aa	1409				DENN [PF02141.20]; uDENN [PF03456.17]	Rab guanyl-nucleotide exchange factor activity [GO:0017112]; cell [GO:0005623]; defecation [GO:0030421]; determination of adult lifespan [GO:0008340]; growth [GO:0040007]; mating [GO:0007618]; oviposition [GO:0018991]; positive regulation of acetylcholine secretion, neurotransmission [GO:0014057]; protein catabolic process [GO:0030163]; synaptic transmission [GO:0007268]	MAPK-activating protein DENN [KOG3570]; Map-Kinase activating death domain-containing protein [meNOG05054]	TM(2x); TM(3x)	NCoils: 0.01 (21/1409); 0.01 (21/1408)	SEG: 0.10 (136/1409)	0.04	0.01	0.01	0.02	0.04	0.02	0.04	0.04	0.04	0.12	3.95	1.26	3.15	3.95	3.82
WBGene00000088	F32A7.6	aex-5	0.01	0.03	1.12	0.01	0	0	0	0.03	0	0	0.01	1.12	0.19	0.06	0.31	3.6	0.17	0.06	0.28	3.6	protein	537 aa	537				P_proprotein [PF01483.19]; Peptidase_S8 [PF00082.21]	defecation [GO:0030421]; embryo development ending in birth or egg hatching [GO:0009792]; locomotion [GO:0040011]; nematode larval development [GO:0002119]; protein catabolic process [GO:0030163]; protein localization to synapse [GO:0035418]; proteolysis [GO:0006508]; serine-type endopeptidase activity [GO:0004252]	Serine-Type endopeptidase [meNOG25967]; Subtilisin-like proprotein convertase [KOG3525]; Subtilisin-like serine proteases [COG1404]	SigP		SEG: 0.05 (26/537)	0.18	0.03	0.01	0.05	0.18	0.05	0.18	0.18	0.18	0.16	13.6	6.94	13.3	11.18	13.6
WBGene00000089	Y87G2A.4	aex-6	0.01	0.01	0.55	0	0.01	0	0.01	0	0.01	0.01	0.01	0.18	0.36	0.27	0.55	0.33	0.67	0.5	1.5	1.5	protein	215 aa	215				Arf [PF00025.20]; Ras [PF00071.21]; Roc [PF08477.12]	GTP binding [GO:0005525]; GTP catabolic process [GO:0006184]; GTPase activity [GO:0003924]; hermaphrodite genitalia development [GO:0040035]; intracellular [GO:0005622]; intracellular protein transport [GO:0006886]; locomotion [GO:0040011]; membrane [GO:0016020]; nematode larval development [GO:0002119]; nucleocytoplasmic transport [GO:0006913]; protein transport [GO:0015031]; signal transduction…	GTPase Rab27, small G protein superfamily [KOG0081]; GTPase SAR1 and related small G proteins [COG1100]; Member RAS oncogene family protein [meNOG01719]		NCoils: 0.10 (21/215)	SEG: 0.05 (10/215)	0.02	0.04	0.03	0.06	0.06	0.06	0.06	0.06	0.04	0.11	7.96	4.37	7.75	7.96	7.84
WBGene00000090	B0334.8	age-1	0	0	0.01	0	0	0	0	0	0	0	0	0	0	0	0.01	0.33	0.33	0.33	3	3	protein	1182 aa	1182				PI3K_C2 [PF00792.23]; PI3K_p85B [PF02192.15]; PI3K_rbd [PF00794.17]; PI3Ka [PF00613.19]; PI3_PI4_kinase [PF00454.26]	binding [GO:0005488]; dauer entry [GO:0043053]; determination of adult lifespan [GO:0008340]; embryo development ending in birth or egg hatching [GO:0009792]; learning or memory [GO:0007611]; locomotion [GO:0040011]; phosphatidylinositol phosphorylation [GO:0046854]; phosphatidylinositol-mediated signaling [GO:0048015]; phosphotransferase activity, alcohol group as acceptor [GO:0016773]; protein …	3-Kinase, catalytic [meNOG07706]; Phosphatidylinositol 3-kinase catalytic subunit (p110) [KOG0904]; Phosphatidylinositol kinase and protein kinases of the PI-3 kinase family [COG5032]			SEG: 0.02 (24/1182)	0	0.01	0	0.03	0.03	0.03	0.03	0.03	0.01	4.56	9.53	37.7	8.18	7.42	9.53
WBGene00000092	F32A6.4	ags-3	0.03	0.02	0.04	0.01	0.02	0.01	0.03	0.01	0.01	0.01	0.02	0.02	0.03	0.02	0.04	0.38	0.62	0.42	1.62	1.62	protein	75-589 aa	589				GoLoco [PF02188.16]; Rapsyn_N [PF10579.8]; TPR_1 [PF00515.27]; TPR_12 [PF13424.5]; TPR_2 [PF07719.16]; TPR_7 [PF13176.5]	G-protein alpha-subunit binding [GO:0001965]; GTPase activator activity [GO:0005096]; GTPase regulator activity [GO:0030695]; cell death [GO:0008219]; embryo development ending in birth or egg hatching [GO:0009792]; membrane [GO:0016020]; protein binding [GO:0005515]; regulation of feeding behavior [GO:0060259]	FOG: TPR repeat [COG0457]; G-Protein signaling modulator [meNOG09014]; Predicted G-alpha GTPase interaction protein, contains GoLoco domain [KOG1130]			SEG: 0.07 (39/589)	0.1	0.16	0.11	0.26	0.26	0.26	0.26	0.26	0.16	5.88	7.74	13.97	7.06	7.74	7.5
WBGene00000093	Y62E10A.5	agt-1	8.58	5.11	0.97	0.98	0.68	8.58	7.57	0.58	0.41	5.11	4.5	0.11	0.08	0.97	0.86	0.11	0.08	1.13	0.88	1.13	protein	133-175 aa	175				DNA_binding_1 [PF01035.19]	DNA dealkylation involved in DNA repair [GO:0006307]; DNA repair [GO:0006281]; catalytic activity [GO:0003824]; damaged DNA binding [GO:0003684]; nucleus [GO:0005634]; transferase activity, transferring alkyl or aryl (other than methyl) groups [GO:0016765]	6-O-methylguanine-DNA methyltransferase MGMT/MGT1, involved in DNA repair [KOG4062]; Alkylguanine-Dna alkyltransferase [meNOG21616]; Methylated DNA-protein cysteine methyltransferase [COG0350]			SEG: 0.13 (22/175)	24.9	17.31	217.86	192.19	217.86	217.86	217.86	192.19	217.86	223.51	25.38	42.67	25.38	22.62	23.13
WBGene00000094	F09E5.13	agt-2	0.01	0	0.01	0.01	0.01	0	0.01	0	0	0	0	0.01	0.01	0	0.01	1	1	0.33	0.67	1	protein	274 aa	274					embryo development ending in birth or egg hatching [GO:0009792]				SEG: 0.10 (27/274)	0.06	0.06	0.02	0.04	0.06	0.06	0.06	0.06	0.06	5.35	6.66	34.56	6.66	4.9	6.28
WBGene00000095	C25A1.11	aha-1	0.01	0.01	1	0	0	0	0.01	0	0	0	0.01	0.33	0.67	0.33	1	0.33	0.67	0.33	1.5	1.5	protein	451-453 aa	453		TF[Gupta+Thomas+Walhout]		HLH [PF00010.25]; PAS [PF00989.24]; PAS_11 [PF14598.5]; PAS_3 [PF08447.11]; PAS_9 [PF13426.6]	DNA binding [GO:0003677]; RNA polymerase II transcription factor binding [GO:0001085]; body morphogenesis [GO:0010171]; cytoplasm [GO:0005737]; intracellular [GO:0005622]; intracellular receptor signaling pathway [GO:0030522]; locomotion [GO:0040011]; nematode larval development [GO:0002119]; nucleus [GO:0005634]; positive regulation of transcription from RNA polymerase II promoter [GO:0045944]; …	Aryl hydrocarbon receptor nuclear translocator [meNOG01253]; Aryl-hydrocarbon receptor nuclear translocator [KOG3561]				0.02	0.04	0.02	0.06	0.06	0.06	0.06	0.06	0.04	0.06	8.6	11.92	6.24	6.94	8.6
WBGene00000096	C41G7.5	ahr-1	0.07	0.09	0.2	0.03	0.04	0.03	0.07	0.04	0.06	0.04	0.09	0.08	0.12	0.08	0.2	0.4	0.6	0.4	1.67	1.67	protein	560-602 aa	602		TF[Gupta+Thomas+Walhout]		PAS [PF00989.24]; PAS_11 [PF14598.5]; PAS_3 [PF08447.11]; PAS_9 [PF13426.6]	DNA binding [GO:0003677]; RNA polymerase II transcription factor binding [GO:0001085]; aryl hydrocarbon receptor activity [GO:0004874]; intracellular [GO:0005622]; intracellular receptor signaling pathway [GO:0030522]; protein binding [GO:0005515]; regulation of transcription, DNA-templated [GO:0006355]; response to xenobiotic stimulus [GO:0009410]; signal transducer activity [GO:0004871]; signal…	Aryl hydrocarbon receptor [meNOG02901]; Aryl-hydrocarbon receptor [KOG3560]			SEG: 0.04 (23/602)	0.02	0.03	0.02	0.05	0.05	0.05	0.05	0.05	0.03	0.25	0.73	0.54	0.51	0.54	0.73
WBGene00000097	F58E10.4	aip-1	0.11	0.11	0.14	0.04	0.11	0.06	0.05	0.04	0.11	0.06	0.05	0.05	0.14	0.08	0.06	0.36	1.67	0.6	0.44	1.67	protein	202 aa	202	Housekeeping			zf-AN1 [PF01428.15]	cellular response to misfolded protein [GO:0071218]; cytoplasm [GO:0005737]; determination of adult lifespan [GO:0008340]; locomotion [GO:0040011]; nucleus [GO:0005634]; response to arsenic-containing substance [GO:0046685]; zinc ion binding [GO:0008270]	Predicted Zn-finger protein [KOG3183]; Zinc finger, AN1-type domain protein [meNOG07768]				1.98	5.56	3.32	2.46	5.56	5.56	3.32	5.56	5.56	40.73	52.55	52.01	41.66	34.16	52.55
WBGene00000098	K07C11.2	air-1	0.09	0.05	0.04	0.04	0.09	0	0	0.02	0.05	0	0	0.02	0.04	0	0	0.41	2.46	0	0.01	2.46	protein	326 aa	326	Housekeeping			Kinase-like [PF14531.5]; Pkinase [PF00069.24]; Pkinase_Tyr [PF07714.16]	ATP binding [GO:0005524]; apoptotic process [GO:0006915]; astral microtubule [GO:0000235]; centrosome [GO:0005813]; condensed nuclear chromosome [GO:0000794]; embryo development ending in birth or egg hatching [GO:0009792]; kinetochore microtubule [GO:0005828]; microtubule nucleation [GO:0007020]; protein binding [GO:0005515]; protein kinase activity [GO:0004672]; protein phosphorylation [GO:0006…	Protein serine/threonine kinase [meNOG00384]; Serine\/threonine protein kinase [COG0515]; Serine\/threonine protein kinase [KOG0580]			SEG: 0.04 (12/326)	4.05	9.95	0.03	0.07	9.95	9.95	4.05	9.95	9.95	235.88	105.73	207.73	96.44	84.36	105.73
WBGene00000099	B0207.4	air-2	0.2	0.12	0.54	0.09	0.02	0.2	0.13	0.06	0.01	0.12	0.08	0.25	0.05	0.54	0.34	0.46	0.09	1.58	0.63	1.58	protein	305 aa	305				Pkinase [PF00069.24]; Pkinase_Tyr [PF07714.16]	ATP binding [GO:0005524]; ATPase binding [GO:0051117]; chromosome condensation [GO:0030261]; chromosome segregation [GO:0007059]; condensed chromosome [GO:0000793]; condensed nuclear chromosome [GO:0000794]; cytokinesis, completion of separation [GO:0007109]; embryo development ending in birth or egg hatching [GO:0009792]; establishment of protein localization [GO:0045184]; hermaphrodite genitali…	Protein serine/threonine kinase [meNOG00384]; Serine\/threonine protein kinase [COG0515]; Serine\/threonine protein kinase [KOG0580]				4.74	0.94	10.36	6.54	10.36	10.36	10.36	6.54	10.36	19.14	51.51	82.89	46.75	37.51	51.51
WBGene00000100	C25A11.4	ajm-1	0	0	0.06	0	0	0	0	0	0	0	0	0.02	0.03	0.02	0.06	0.33	0.5	0.33	2	2	protein	845-1480 aa	1480					apical junction complex [GO:0043296]; apicolateral plasma membrane [GO:0016327]; cell-cell adherens junction [GO:0005913]; cell-cell junction organization [GO:0045216]; cytoskeletal protein binding [GO:0008092]; embryo development ending in birth or egg hatching [GO:0009792]; locomotion [GO:0040011]; negative regulation of vulval development [GO:0040027]	Unnamed protein [LSE2648]	TM(2x)	NCoils: 0.33 (486/1480); 0.49 (465/944); 0.42 (486/1148); 0.34 (486/1439); 0.53 (451/845)	SEG: 0.54 (513/944)	0.02	0.03	0.02	0.06	0.06	0.06	0.06	0.06	0.03	1.02	14.5	16	11.74	14.5	13.87
WBGene00000101	D1022.7	aka-1	0.05	0.02	0.09	0	0	0	0.05	0	0	0	0.02	0.01	0	0	0.09	0.08	0.04	0.03	12.8	12.8	protein	605-1284 aa	1284				DUF3480 [PF11979.7]; FYVE [PF01363.20]	determination of adult lifespan [GO:0008340]; metal ion binding [GO:0046872]; nematode larval development [GO:0002119]; phosphatidylinositol-3-phosphate binding [GO:0032266]	Smad anchor for receptor activation [KOG1841]; Zinc finger, FYVE domain containing protein [meNOG03874]			SEG: 0.12 (71/605)	0.1	0.05	0.04	1.28	1.28	1.28	1.28	1.28	0.1	14.81	27.58	82.11	26.15	21.68	27.58
WBGene00000102	C12D8.10	akt-1	0.01	0	0.01	0	0.01	0	0	0	0	0	0	0	0.01	0	0	0.33	3	0.11	0.22	3	protein	254-546 aa	546				Kinase-like [PF14531.5]; PH [PF00169.28]; Pkinase [PF00069.24]; Pkinase_C [PF00433.23]; Pkinase_Tyr [PF07714.16]	ATP binding [GO:0005524]; calmodulin binding [GO:0005516]; dauer entry [GO:0043053]; determination of adult lifespan [GO:0008340]; insulin receptor signaling pathway [GO:0008286]; lipid storage [GO:0019915]; neuronal cell body [GO:0043025]; protein kinase activity [GO:0004672]; protein phosphorylation [GO:0006468]; protein serine/threonine kinase activity [GO:0004674]; transferase activity, trans…	Serine/threonine protein kinase [COG0515]; Serine\/threonine protein kinase [KOG0690]; V-Akt murine thymoma viral oncogene homolog protein [meNOG03969]			SEG: 0.02 (12/546)	0.09	0.27	0.03	0.06	0.27	0.27	0.09	0.27	0.27	24.18	49.69	115.73	49.69	46.19	47.49
WBGene00000103	F28H6.1	akt-2	0	0.01	0.01	0	0	0	0	0	0	0	0.01	0	0	0	0.01	0.25	0.5	0.5	2	2	protein	483-528 aa	528				Kinase-like [PF14531.5]; PH [PF00169.28]; Pkinase [PF00069.24]; Pkinase_C [PF00433.23]; Pkinase_Tyr [PF07714.16]	ATP binding [GO:0005524]; dauer entry [GO:0043053]; determination of adult lifespan [GO:0008340]; insulin receptor signaling pathway [GO:0008286]; intracellular [GO:0005622]; protein kinase activity [GO:0004672]; protein phosphorylation [GO:0006468]; protein serine/threonine kinase activity [GO:0004674]; transferase activity, transferring phosphorus-containing groups [GO:0016772]	Serine/threonine protein kinase [COG0515]; Serine\/threonine protein kinase [KOG0690]; V-Akt murine thymoma viral oncogene homolog protein [meNOG03969]			SEG: 0.02 (11/528)	0.01	0.02	0.02	0.04	0.04	0.04	0.04	0.04	0.02	4.1	11.71	7.24	9.91	11.71	8.06
WBGene00000105	F48F7.1	alg-1	0.05	0.03	0.28	0.05	0	0	0	0.03	0	0	0	0.28	0.01	0.01	0.01	21	0.02	0.02	0.05	21	protein	1002-1023 aa	1023	Housekeeping			ArgoL1 [PF08699.9]; ArgoL2 [PF16488.4]; ArgoMid [PF16487.4]; ArgoN [PF16486.4]; PAZ [PF02170.21]; Piwi [PF02171.16]	cytoplasm [GO:0005737]; cytoplasmic mRNA processing body [GO:0000932]; embryo development [GO:0009790]; embryo development ending in birth or egg hatching [GO:0009792]; germ cell development [GO:0007281]; hermaphrodite genitalia development [GO:0040035]; locomotion [GO:0040011]; miRNA binding [GO:0035198]; micro-ribonucleoprotein complex [GO:0035068]; molting cycle, collagen and cuticulin-based c…	Eukaryotic translation initiation factor 2C [meNOG00016]; Translation initiation factor 2C (eIF-2C) and related proteins [KOG1041]			SEG: 0.08 (83/1023)	0.42	0.01	0.01	0.02	0.42	0.02	0.42	0.42	0.42	1.51	9.28	13.39	7.07	8.32	9.28
WBGene00000106	T07D3.7	alg-2	0.01	0	0	0	0	0	0.01	0	0	0	0	0	0	0	0	0.33	0.67	0.33	1.5	1.5	protein	891-910 aa	910				ArgoL1 [PF08699.9]; ArgoL2 [PF16488.4]; ArgoMid [PF16487.4]; ArgoN [PF16486.4]; PAZ [PF02170.21]; Piwi [PF02171.16]	cytoplasm [GO:0005737]; determination of adult lifespan [GO:0008340]; embryo development [GO:0009790]; embryo development ending in birth or egg hatching [GO:0009792]; miRNA binding [GO:0035198]; micro-ribonucleoprotein complex [GO:0035068]; nematode larval development [GO:0002119]; nucleic acid binding [GO:0003676]; protein binding [GO:0005515]; reproduction [GO:0000003]	Eukaryotic translation initiation factor 2C [meNOG00016]; Translation initiation factor 2C (eIF-2C) and related proteins [KOG1041]				0.01	0.02	0.01	0.03	0.03	0.03	0.03	0.03	0.02	8.36	4.78	38.69	3.59	4.78	4.49
WBGene00000107	F54D8.3	alh-1	0.03	0.02	0.03	0	0	0	0.03	0	0	0	0.02	0	0	0	0.03	0.02	0.02	0.01	49.09	49.09	protein	422-510 aa	510	Housekeeping			Aldedh [PF00171.21]	lipid storage [GO:0019915]; metabolic process [GO:0008152]; multicellular organismal homeostasis [GO:0048871]; oxidation-reduction process [GO:0055114]; oxidoreductase activity [GO:0016491]; oxidoreductase activity, acting on the aldehyde or oxo group of donors, NAD or NADP as acceptor [GO:0016620]	Aldehyde dehydrogenase [KOG2450]; Aldehyde dehydrogenase [meNOG01700]; NAD-dependent aldehyde dehydrogenases [COG1012]				0.09	0.11	0.07	5.4	5.4	5.4	5.4	5.4	0.11	172.01	177.58	221.24	165.62	177.58	177.09
WBGene00000108	K04F1.15	alh-2	0.43	0.6	1	0.14	0.29	0.14	0.43	0.2	0.4	0.2	0.6	0.33	0.67	0.33	1	0.33	0.67	0.33	1.5	1.5	protein	514 aa	514				Aldedh [PF00171.21]	metabolic process [GO:0008152]; oxidation-reduction process [GO:0055114]; oxidoreductase activity [GO:0016491]; oxidoreductase activity, acting on the aldehyde or oxo group of donors, NAD or NADP as acceptor [GO:0016620]	Aldehyde dehydrogenase [KOG2450]; Aldehyde dehydrogenase [meNOG01700]; NAD-dependent aldehyde dehydrogenases [COG1012]				0.01	0.02	0.01	0.03	0.03	0.03	0.03	0.03	0.02	0.03	0.07	0.05	0.05	0.02	0.07
WBGene00000109	F36H1.6	alh-3	0	0	0.12	0	0	0	0	0	0	0	0	0.12	0.02	0.01	0.01	6.33	0.16	0.05	0.05	6.33	protein	908 aa	908				Aldedh [PF00171.21]; Formyl_trans_C [PF02911.17]; Formyl_trans_N [PF00551.18]; PP-binding [PF00550.24]	10-formyltetrahydrofolate catabolic process [GO:0009258]; biosynthetic process [GO:0009058]; catalytic activity [GO:0003824]; cytoplasm [GO:0005737]; formyltetrahydrofolate dehydrogenase activity [GO:0016155]; hydroxymethyl-, formyl- and related transferase activity [GO:0016742]; metabolic process [GO:0008152]; one-carbon metabolic process [GO:0006730]; oxidation-reduction process [GO:0055114]; o…	Aldehyde dehydrogenase 1 family, member [meNOG03345]; Formyltetrahydrofolate dehydrogenase [KOG2452]; Methionyl-tRNA formyltransferase [COG0223]; NAD-dependent aldehyde dehydrogenases [COG1012]		NCoils: 0.02 (21/908)	SEG: 0.03 (30/908)	0.19	0.03	0.01	0.01	0.19	0.03	0.19	0.19	0.19	1.56	40.82	42.85	31.91	31.97	40.82
WBGene00000110	T05H4.13	alh-4	0.04	0.05	0.92	0	0	0.02	0.04	0	0	0.02	0.05	0.02	0.02	0.36	0.92	0.02	0.02	0.39	2.57	2.57	protein	493-494 aa	494				Aldedh [PF00171.21]	aldehyde dehydrogenase [NAD(P)+] activity [GO:0004030]; cellular aldehyde metabolic process [GO:0006081]; determination of adult lifespan [GO:0008340]; embryo development ending in birth or egg hatching [GO:0009792]; metabolic process [GO:0008152]; nematode larval development [GO:0002119]; oxidation-reduction process [GO:0055114]; oxidoreductase activity [GO:0016491]; oxidoreductase activity, act…	Aldehyde dehydrogenase [KOG2456]; Aldehyde dehydrogenase [meNOG06589]; NAD-dependent aldehyde dehydrogenases [COG1012]	TM(1x)	NCoils: 0.04 (21/493); 0.04 (21/493); 0.04 (21/494)	SEG: 0.02 (9/494)	0.12	0.1	2.08	5.34	5.34	5.34	5.34	5.34	2.08	5.79	137.86	99.65	113.63	121.35	137.86
WBGene00000111	T08B1.3	alh-5	0	0.01	0.09	0	0	0	0	0	0.01	0.01	0.01	0.02	0.04	0.04	0.09	0.25	0.5	0.5	2	2	protein	437 aa	437				Aldedh [PF00171.21]	aldehyde dehydrogenase [NAD(P)+] activity [GO:0004030]; cellular aldehyde metabolic process [GO:0006081]; metabolic process [GO:0008152]; oxidation-reduction process [GO:0055114]; oxidoreductase activity [GO:0016491]; oxidoreductase activity, acting on the aldehyde or oxo group of donors, NAD or NADP as acceptor [GO:0016620]	Aldehyde dehydrogenase [KOG2456]; Aldehyde dehydrogenase [meNOG06589]; NAD-dependent aldehyde dehydrogenases [COG1012]		NCoils: 0.05 (22/437)	SEG: 0.03 (13/437)	0.01	0.02	0.02	0.04	0.04	0.04	0.04	0.04	0.02	0.45	19.99	3.71	14.71	19.99	12.75
WBGene00000112	F56D12.1	alh-6	0	0.01	0.09	0	0	0	0	0	0	0	0.01	0.03	0.05	0.04	0.09	0.34	0.59	0.41	1.71	1.71	protein	394-563 aa	563				Aldedh [PF00171.21]	1-pyrroline-5-carboxylate dehydrogenase activity [GO:0003842]; developmental process [GO:0032502]; glutamate biosynthetic process [GO:0006537]; locomotion [GO:0040011]; metabolic process [GO:0008152]; oxidation-reduction process [GO:0055114]; oxidoreductase activity [GO:0016491]; oxidoreductase activity, acting on the aldehyde or oxo group of donors, NAD or NADP as acceptor [GO:0016620]; proline …	Aldehyde dehydrogenase 4 family, member A1 [meNOG04807]; Delta-1-pyrroline-5-carboxylate dehydrogenase [KOG2455]; NAD-dependent aldehyde dehydrogenases [COG1012]				0.1	0.17	0.12	0.29	0.29	0.29	0.29	0.29	0.17	3.13	64.68	49.32	59.11	64.68	56.99
WBGene00000113	F45H10.1	alh-7	0.36	0.37	0.65	0.03	0.36	0	0.05	0.03	0.37	0	0.05	0.06	0.65	0	0.09	0.09	7.51	0.01	0.13	7.51	protein	205-493 aa	493				Aldedh [PF00171.21]	embryo development ending in birth or egg hatching [GO:0009792]; locomotion [GO:0040011]; metabolic process [GO:0008152]; nematode larval development [GO:0002119]; oxidation-reduction process [GO:0055114]; oxidoreductase activity [GO:0016491]; oxidoreductase activity, acting on the aldehyde or oxo group of donors, NAD or NADP as acceptor [GO:0016620]					1.19	12.99	0.07	1.73	12.99	12.99	1.73	12.99	12.99	20.1	35.85	35.05	35.85	27.05	23.05
WBGene00000114	F13D12.4	alh-8	0.21	0.12	0.16	0.16	0.02	0.21	0.01	0.1	0.01	0.12	0.01	0.12	0.01	0.16	0.01	0.78	0.09	1.28	0.05	1.28	protein	113-523 aa	523	Housekeeping			Aldedh [PF00171.21]	metabolic process [GO:0008152]; methylmalonate-semialdehyde dehydrogenase (acylating) activity [GO:0004491]; mitochondrion [GO:0005739]; oxidation-reduction process [GO:0055114]; oxidoreductase activity [GO:0016491]; oxidoreductase activity, acting on the aldehyde or oxo group of donors, NAD or NADP as acceptor [GO:0016620]	Aldehyde dehydrogenase 6 family, member A1 [meNOG04601]; Methylmalonate semialdehyde dehydrogenase [KOG2449]; NAD-dependent aldehyde dehydrogenases [COG1012]			SEG: 0.03 (15/523)	51.08	6.14	65.53	3.12	65.53	65.53	65.53	51.08	65.53	415.86	311.72	528.92	253.07	311.72	274.69
WBGene00000115	F01F1.6	alh-9	0	0	0	0	0	0	0	0	0	0	0	0	0	0	0	0.4	0.6	0.4	1.67	1.67	protein	531 aa	531				Aldedh [PF00171.21]	metabolic process [GO:0008152]; oxidation-reduction process [GO:0055114]; oxidoreductase activity [GO:0016491]; oxidoreductase activity, acting on the aldehyde or oxo group of donors, NAD or NADP as acceptor [GO:0016620]	Aldehyde dehydrogenase 7 family, member A1 [meNOG05751]; Aldehyde dehydrogenase [KOG2453]; NAD-dependent aldehyde dehydrogenases [COG1012]	SigP		SEG: 0.06 (32/531)	0.02	0.03	0.02	0.05	0.05	0.05	0.05	0.05	0.03	25.14	117.78	138.66	108.41	103.59	117.78
WBGene00000116	C54D1.4	alh-10	0	0	1	0	0	0	0	0	0	0	0	0.33	0.67	0.33	1	0.33	0.67	0.33	1.5	1.5	protein	506 aa	506				Aldedh [PF00171.21]	metabolic process [GO:0008152]; multicellular organismal homeostasis [GO:0048871]; oxidation-reduction process [GO:0055114]; oxidoreductase activity [GO:0016491]; oxidoreductase activity, acting on the aldehyde or oxo group of donors, NAD or NADP as acceptor [GO:0016620]	Aldehyde dehydrogenase 8 family, member A1 [meNOG05840]; Aldehyde dehydrogenase [KOG2450]; NAD-dependent aldehyde dehydrogenases [COG1012]		NCoils: 0.04 (21/506)		0.01	0.02	0.01	0.03	0.03	0.03	0.03	0.03	0.02	0.03	9.89	12.57	8.75	9.18	9.89
WBGene00000117	F42G9.5	alh-11	0	0	0	0	0	0	0	0	0	0	0	0	0	0	0	1	0.6	0.4	1	1	protein	503-687 aa	687				Aldedh [PF00171.21]; Peptidase_C92 [PF05708.11]	metabolic process [GO:0008152]; oxidation-reduction process [GO:0055114]; oxidoreductase activity [GO:0016491]; oxidoreductase activity, acting on the aldehyde or oxo group of donors, NAD or NADP as acceptor [GO:0016620]	Aldehyde dehydrogenase 9 family, member A1 [meNOG09623]; Aldehyde dehydrogenase [KOG2450]; NAD-dependent aldehyde dehydrogenases [COG1012]			SEG: 0.05 (27/503)	0.05	0.03	0.02	0.05	0.05	0.05	0.05	0.05	0.05	19.05	32.16	32.91	32.16	26.44	31.26
WBGene00000118	Y69F12A.2	alh-12	0	0	0.02	0	0	0	0	0	0	0	0	0.01	0.02	0.01	0.02	0.36	0.64	0.45	1.57	1.57	protein	430-499 aa	499				Aldedh [PF00171.21]	metabolic process [GO:0008152]; oxidation-reduction process [GO:0055114]; oxidoreductase activity [GO:0016491]; oxidoreductase activity, acting on the aldehyde or oxo group of donors, NAD or NADP as acceptor [GO:0016620]	Aldehyde dehydrogenase 9 family, member A1 [meNOG09623]; Aldehyde dehydrogenase [KOG2450]; NAD-dependent aldehyde dehydrogenases [COG1012]			SEG: 0.03 (11/430)	0.04	0.07	0.05	0.11	0.11	0.11	0.11	0.11	0.07	4.4	37.19	53.5	37.18	37.18	37.19
WBGene00000120	C01F6.5	aly-1	0.01	0	0.01	0	0	0	0.01	0	0	0	0	0	0.01	0	0.01	0.38	0.62	0.38	1.6	1.6	protein	223 aa	223				FoP_duplication [PF13865.5]	locomotion [GO:0040011]; nucleotide binding [GO:0000166]	RRM motif-containing protein [KOG0533]			SEG: 0.07 (15/223)	0.03	0.05	0.03	0.08	0.08	0.08	0.08	0.08	0.05	7.83	10.04	28.74	9	10.04	9.57
WBGene00000121	F23B2.6	aly-2	0.01	0	0.09	0	0.01	0	0	0	0	0	0	0	0.09	0	0.01	0.05	12.5	0.03	0.08	12.5	protein	227 aa	227				FoP_duplication [PF13865.5]	locomotion [GO:0040011]; nucleotide binding [GO:0000166]; reproduction [GO:0000003]	Component of the THO subcomplex of the TREX complex. The TREX complex specifically associates with spliced mRNA and not with unspliced pre-mRNA. It is recruited to spliced mRNAs by a transcription-independent mechanism. Binds to mRNA upstream of the exon-junction complex (EJC) and is recruited in a splicing- and cap-dependent manner to a region near the 5' end of the mRNA where it functions in mR…			SEG: 0.19 (43/227)	0.05	1	0.03	0.08	1	1	0.08	1	1	11.57	94.87	357.31	94.87	77.84	78.6
WBGene00000122	M18.7	aly-3	0.03	0.02	0.03	0.02	0	0.03	0	0.01	0	0.02	0	0.02	0	0.03	0	0.63	0.05	1.59	0.05	1.59	protein; ncRNA	240 aa	240	Housekeeping			FoP_duplication [PF13865.5]	locomotion [GO:0040011]; nucleotide binding [GO:0000166]				SEG: 0.20 (48/240)	2.02	0.16	3.21	0.16	3.21	3.21	3.21	2.02	3.21	120.36	95.7	210.7	95.7	81.92	81.19
WBGene00000123	F36A4.7	ama-1	0	0	1	0	0	0	0	0	0	0	0	1	1	1	1	1	1	1	1	1	protein	1856 aa	1856				RNA_pol_Rpb1_1 [PF04997.11]; RNA_pol_Rpb1_2 [PF00623.19]; RNA_pol_Rpb1_3 [PF04983.17]; RNA_pol_Rpb1_4 [PF05000.16]; RNA_pol_Rpb1_5 [PF04998.16]; RNA_pol_Rpb1_6 [PF04992.13]; RNA_pol_Rpb1_7 [PF04990.11]; RNA_pol_Rpb1_R [PF05001.12]	DNA binding [GO:0003677]; DNA-directed RNA polymerase II, core complex [GO:0005665]; DNA-directed RNA polymerase activity [GO:0003899]; RNA polymerase II activity [GO:0001055]; asymmetric cell division [GO:0008356]; developmental process [GO:0032502]; embryo development ending in birth or egg hatching [GO:0009792]; exit from mitosis [GO:0010458]; gastrulation [GO:0007369]; hatching [GO:0035188]; …	DNA-directed RNA polymerase, beta' subunit/160 kD subunit [COG0086]; Dna-Directed RNA polymerase [meNOG01029]; RNA polymerase II, large subunit [KOG0260]			SEG: 0.16 (300/1856)	0	0	0	0.01	0.01	0.01	0.01	0.01	0	0.01	17.28	57.82	15.97	15.65	17.28
WBGene00000133	C05E11.4	amt-1	0	0.03	1	0	0	0	0	0.01	0.02	0.01	0.03	0.33	0.67	0.33	1	0.33	0.67	0.33	1.5	1.5	protein	534 aa	534				Ammonium_transp [PF00909.20]	ammonium transmembrane transport [GO:0072488]; ammonium transmembrane transporter activity [GO:0008519]; ammonium transport [GO:0015696]; membrane [GO:0016020]	Ammonia permease [COG0004]; Ammonia permease [KOG0682]; Ammonium transmembrane transporter protein [meNOG14234]	TM(11x)			0.01	0.02	0.01	0.03	0.03	0.03	0.03	0.03	0.02	0.03	23.6	1.06	13.16	23.6	7.66
WBGene00000134	F49E11.3	amt-2	0.03	0.19	0.05	0.01	0.02	0.01	0.03	0.06	0.12	0.06	0.19	0.02	0.04	0.02	0.05	0.33	0.67	0.33	1.5	1.5	protein	515 aa	515				Ammonium_transp [PF00909.20]	ammonium transmembrane transport [GO:0072488]; ammonium transmembrane transporter activity [GO:0008519]; ammonium transport [GO:0015696]; determination of adult lifespan [GO:0008340]; membrane [GO:0016020]	Ammonia permease [COG0004]; Ammonia permease [KOG0682]; Ammonium transporter protein [meNOG09958]	TM(11x)		SEG: 0.03 (13/515)	0.01	0.02	0.01	0.03	0.03	0.03	0.03	0.03	0.02	0.57	0.9	0.16	0.84	0.89	0.9
WBGene00000135	M195.3	amt-3	0.01	0.04	1	0.01	0.01	0.01	0.01	0.02	0.02	0.02	0.04	0.5	0.5	0.5	1	0.5	0.5	0.5	2	2	protein	687 aa	687				Ammonium_transp [PF00909.20]	ammonium transmembrane transport [GO:0072488]; ammonium transmembrane transporter activity [GO:0008519]; ammonium transport [GO:0015696]; membrane [GO:0016020]	Ammonia permease [COG0004]; Ammonia permease [KOG0682]; Ammonium transporter protein [meNOG09958]	TM(11x)	NCoils: 0.03 (22/687)	SEG: 0.14 (99/687)	0.01	0.01	0.01	0.02	0.02	0.02	0.02	0.02	0.01	0.02	1.59	0.51	1.36	1.56	1.59
WBGene00000136	C05E11.5	amt-4	0	0	0	0	0	0	0	0	0	0	0	0	0	0	0	1	0.5	0.5	1	1	protein	577 aa	577				Ammonium_transp [PF00909.20]	ammonium transmembrane transport [GO:0072488]; ammonium transmembrane transporter activity [GO:0008519]; ammonium transport [GO:0015696]; membrane [GO:0016020]	Ammonia permease [COG0004]; Ammonia permease [KOG0682]; Ammonium transmembrane transporter protein [meNOG14234]	TM(9x)		SEG: 0.02 (12/577)	0.02	0.01	0.01	0.02	0.02	0.02	0.02	0.02	0.02	19.04	14.13	25.78	5.12	5.29	14.13
WBGene00000137	R13G10.2	amx-1	0.01	0	0.01	0	0	0	0.01	0	0	0	0	0.01	0.01	0.01	0.01	0.5	0.5	0.5	2	2	protein	824 aa	824				Amino_oxidase [PF01593.23]; DAO [PF01266.23]; NAD_binding_8 [PF13450.5]; Pyr_redox [PF00070.26]	DNA binding [GO:0003677]; determination of adult lifespan [GO:0008340]; histone H3-K4 demethylation [GO:0034720]; histone demethylase activity (H3-dimethyl-K4 specific) [GO:0034648]; oxidation-reduction process [GO:0055114]; oxidoreductase activity [GO:0016491]	Amine oxidase [KOG0029]; Lysine (K)-specific demethylase 1B [meNOG00741]			SEG: 0.04 (37/824)	0.01	0.01	0.01	0.02	0.02	0.02	0.02	0.02	0.01	1.41	2.2	10.48	1.63	1.57	2.2
WBGene00000138	B0019.1	amx-2	0	0	0.02	0	0	0	0	0	0	0	0	0.01	0.01	0.01	0.02	0.5	0.5	0.5	2	2	protein	724 aa	724				Amino_oxidase [PF01593.23]; FAD_binding_2 [PF00890.23]; Lycopene_cycl [PF05834.11]; NAD_binding_8 [PF13450.5]; Thi4 [PF01946.16]	oxidation-reduction process [GO:0055114]; oxidoreductase activity [GO:0016491]; striated muscle myosin thick filament assembly [GO:0071688]	Amine oxidase [KOG0029]; Monoamine oxidase [COG1231]	SigP		SEG: 0.12 (86/724)	0.01	0.01	0.01	0.02	0.02	0.02	0.02	0.02	0.01	1.11	9.22	4.79	9.22	8.01	9.06
WBGene00000139	F25C8.2	amx-3	0.02	0.02	0.06	0.01	0.01	0.01	0.02	0.01	0.01	0.01	0.02	0.02	0.04	0.02	0.06	0.38	0.62	0.38	1.6	1.6	protein	365-454 aa	454				Amino_oxidase [PF01593.23]; NAD_binding_8 [PF13450.5]	determination of adult lifespan [GO:0008340]; oxidation-reduction process [GO:0055114]; oxidoreductase activity [GO:0016491]	Flavin-containing amine oxidase [KOG0685]				0.03	0.05	0.03	0.08	0.08	0.08	0.08	0.08	0.05	1.4	4.2	4.17	3.79	4.2	4.05
WBGene00000140	ZK973.6	anc-1	0	0	0.03	0	0	0	0	0	0	0	0	0.03	0.01	0.01	0.01	2	0.5	0.5	0.5	2	protein	8545 aa	8545				CAMSAP_CH [PF11971.7]; CH [PF00307.30]; DUF2247 [PF10004.8]; KASH [PF10541.8]; RBD-FIP [PF09457.9]; Trimer_CC [PF08954.10]	actin binding [GO:0003779]; chaperone binding [GO:0051087]; cytoplasm [GO:0005737]; cytoskeleton organization [GO:0007010]; embryo development ending in birth or egg hatching [GO:0009792]; integral component of membrane [GO:0016021]; localization [GO:0051179]; molting cycle, collagen and cuticulin-based cuticle [GO:0018996]; nematode larval development [GO:0002119]; pronuclear migration [GO:00350…	Ca2+-binding actin-bundling protein fimbrin/plastin (EF-Hand superfamily) [COG5069]; Dystonin, GAS (Growth-arrest-specific protein), and related proteins [KOG0516]; Spectrin repeat containing, nuclear envelope protein [meNOG00419]		NCoils: 0.26 (2260/8545)	SEG: 0.09 (733/8545)	0.02	0	0	0	0.02	0	0.02	0.02	0.02	0.77	9.36	10.69	7.03	8.15	9.36
WBGene00000142	C08B6.9	aos-1	0.01	0	0.01	0.01	0	0	0	0	0	0	0	0.01	0	0	0	6.6	0.15	0.06	0.12	6.6	protein	343 aa	343				ThiF [PF00899.20]	catalytic activity [GO:0003824]; embryo development ending in birth or egg hatching [GO:0009792]; nematode larval development [GO:0002119]; oogenesis [GO:0048477]; protein sumoylation [GO:0016925]; reproduction [GO:0000003]	Activating enzyme subunit 1 [meNOG08026]; Dinucleotide-utilizing enzymes involved in molybdopterin and thiamine biosynthesis family 2 [COG0476]; SMT3/SUMO-activating complex, AOS1\/RAD31 component [KOG2014]				0.33	0.05	0.02	0.04	0.33	0.05	0.33	0.33	0.33	23.02	35.18	104.13	34.56	29.59	35.18
WBGene00000143	K06H7.6	apc-2	0	0	0.01	0	0	0	0	0	0	0	0	0	0	0	0.01	0.5	0.5	0.5	2	2	protein	731 aa	731				ANAPC2 [PF08672.10]; Cullin [PF00888.21]	cullin-RING ubiquitin ligase complex [GO:0031461]; embryo development ending in birth or egg hatching [GO:0009792]; hermaphrodite genitalia development [GO:0040035]; inductive cell migration [GO:0040039]; receptor-mediated endocytosis [GO:0006898]; reproduction [GO:0000003]; ubiquitin protein ligase binding [GO:0031625]; ubiquitin-dependent protein catabolic process [GO:0006511]	Anaphase-Promoting complex subunit 2 [meNOG07456]; Anaphase-promoting complex (APC), subunit 2 [KOG2165]			SEG: 0.04 (27/731)	0.01	0.01	0.01	0.02	0.02	0.02	0.02	0.02	0.01	3.32	12.96	44.97	12.96	9.86	12.18
WBGene00000144	F15H10.3	apc-10	0.02	0.01	0.07	0.01	0.01	0.01	0.02	0	0.01	0	0.01	0.03	0.04	0.03	0.07	0.41	0.61	0.41	1.65	1.65	protein	201-212 aa	212				ANAPC10 [PF03256.15]	locomotion [GO:0040011]; nematode larval development [GO:0002119]					0.21	0.31	0.21	0.51	0.51	0.51	0.51	0.51	0.31	7.6	23	54.89	23	20.44	19.31
WBGene00000145	F35G12.9	apc-11	0.08	0.02	0.07	0.08	0	0.01	0.01	0.02	0	0	0	0.07	0	0.01	0	12.38	0.04	0.08	0.06	12.38	protein	135 aa	135				zf-ANAPC11 [PF12861.6]; zf-C3HC4 [PF00097.24]; zf-RING_2 [PF13639.5]; zf-rbx1 [PF12678.6]	anaphase-promoting complex [GO:0005680]; cyclin catabolic process [GO:0008054]; embryo development [GO:0009790]; embryo development ending in birth or egg hatching [GO:0009792]; meiotic chromosome segregation [GO:0045132]; negative regulation of vulval development [GO:0040027]; oogenesis [GO:0048477]; protein binding [GO:0005515]; protein ubiquitination involved in ubiquitin-dependent protein cat…	Anaphase promoting complex subunit 11 [meNOG16984]; Anaphase-promoting complex (APC), subunit 11 [KOG1493]; Component of SCF ubiquitin ligase and anaphase-promoting complex [COG5194]				1.98	0.08	0.16	0.12	1.98	0.16	1.98	1.98	1.98	28.94	23.46	94.26	20.26	21.17	23.46
WBGene00000146	F46F3.4	ape-1	0	0	1	0	0	0	0	0	0	0	0	0.33	0.56	0.44	1	0.33	0.56	0.44	1.8	1.8	protein	341-769 aa	769				Ank [PF00023.29]; Ank_2 [PF12796.6]; Ank_3 [PF13606.5]; Ank_4 [PF13637.5]; Ank_5 [PF13857.5]; SH3_1 [PF00018.27]; SH3_2 [PF07653.16]; SH3_9 [PF14604.5]	apoptotic process [GO:0006915]; cell death [GO:0008219]; negative regulation of apoptotic process [GO:0043066]; nucleus [GO:0005634]; p53 binding [GO:0002039]; protein binding [GO:0005515]	Protein involved in induction of apoptosis [meNOG08791]; p53-interacting protein 53BP/ASPP, contains ankyrin and SH3 domains [KOG0515]		NCoils: 0.08 (59/769); 0.08 (59/705)	SEG: 0.13 (89/705)	0.03	0.05	0.04	0.09	0.09	0.09	0.09	0.09	0.05	0.09	29.83	94.04	21.87	25.09	29.83
WBGene00000147	VF36H2L.1	aph-1	0.01	0	0.69	0	0.01	0	0.01	0	0	0	0	0.15	0.69	0.15	0.38	0.22	1.8	0.22	0.56	1.8	protein	308 aa	308				Aph-1 [PF06105.11]	Notch signaling pathway [GO:0007219]; cell fate commitment [GO:0045165]; cell fate commitment involved in pattern specification [GO:0060581]; embryo development ending in birth or egg hatching [GO:0009792]; embryonic morphogenesis [GO:0048598]; integral component of membrane [GO:0016021]; locomotion [GO:0040011]; oocyte development [GO:0048599]; pharynx development [GO:0060465]; positive regulati…	Anterior pharynx defective 1 homolog protein [meNOG07270]; Predicted membrane protein [KOG3972]	TM(7x)		SEG: 0.07 (21/308)	0.02	0.09	0.02	0.05	0.09	0.09	0.05	0.09	0.09	0.13	8.08	39.54	5.7	6.75	8.08
WBGene00000148	ZC434.6	aph-2	0.01	0	0.67	0	0	0	0.01	0	0	0	0	0.17	0.33	0.33	0.67	0.25	0.5	0.5	2	2	protein	721-723 aa	723				Nicastrin [PF05450.14]	Notch signaling pathway [GO:0007219]; cell fate commitment involved in pattern specification [GO:0060581]; embryo development ending in birth or egg hatching [GO:0009792]; embryonic morphogenesis [GO:0048598]; integral component of membrane [GO:0016021]; oviposition [GO:0018991]; pharynx development [GO:0060465]; plasma membrane [GO:0005886]; protein processing [GO:0016485]	Nicastrin protein [meNOG06803]; Transmembrane glycoprotein nicastrin [KOG2657]	SigP+TM(1x)		SEG: 0.03 (23/723)	0.01	0.02	0.02	0.04	0.04	0.04	0.04	0.04	0.02	0.06	6.95	25.74	6.22	5.51	6.95
WBGene00000149	C42D8.8	apl-1	0	0	0	0	0	0	0	0	0	0	0	0	0	0	0	1.33	0.5	0.25	0.75	1.33	protein	684-686 aa	686	Housekeeping			APP_Cu_bd [PF12924.6]; APP_E2 [PF12925.6]; APP_N [PF02177.15]; APP_amyloid [PF10515.8]	body morphogenesis [GO:0010171]; cytoplasmic vesicle [GO:0031410]; ecdysis, collagen and cuticulin-based cuticle [GO:0042395]; heparin binding [GO:0008201]; integral component of membrane [GO:0016021]; locomotion [GO:0040011]; molting cycle, collagen and cuticulin-based cuticle [GO:0018996]; nematode larval development [GO:0002119]; neuron projection [GO:0043005]; neuronal cell body [GO:0043025];…	Beta amyloid precursor protein [KOG3540]; Protein involved in collateral sprouting in absence of injury [meNOG04693]	SigP+TM(1x)	NCoils: 0.04 (28/686); 0.04 (28/684)	SEG: 0.17 (118/686)	0.04	0.02	0.01	0.03	0.04	0.03	0.04	0.04	0.04	21.46	107.24	63.48	88.87	107.24	100.7
WBGene00000150	F55A12.7	apm-1	0	0	0.5	0	0	0	0	0	0	0	0	0.17	0.33	0.17	0.5	0.33	0.67	0.33	1.5	1.5	protein	426 aa	426				Adap_comp_sub [PF00928.20]; Clat_adaptor_s [PF01217.19]	clathrin adaptor complex [GO:0030131]; innate immune response [GO:0045087]; intracellular protein transport [GO:0006886]; locomotion [GO:0040011]; nematode larval development [GO:0002119]; protein binding [GO:0005515]; protein secretion [GO:0009306]; reproduction [GO:0000003]; transport [GO:0006810]; vesicle-mediated transport [GO:0016192]	Adaptor complexes medium subunit family [KOG0937]; Adaptor-Related protein complex 1, mu [meNOG09723]				0.01	0.02	0.01	0.03	0.03	0.03	0.03	0.03	0.02	0.06	44.97	17.21	44.17	42.03	44.97
WBGene00000151	T05H10.2	apn-1	0	0	0	0	0	0	0	0	0	0	0	0	0	0	0	0.25	0.5	0.5	2	2	protein	396 aa	396				AP_endonuc_2 [PF01261.23]	DNA binding [GO:0003677]; DNA repair [GO:0006281]; DNA-(apurinic or apyrimidinic site) lyase activity [GO:0003906]; apoptotic process [GO:0006915]; base-excision repair [GO:0006284]; embryo development ending in birth or egg hatching [GO:0009792]; phosphoric diester hydrolase activity [GO:0008081]; zinc ion binding [GO:0008270]	Deoxyribonuclease IV (phage-T4-induced) [meNOG12003]; Endonuclease IV [COG0648]; Major apurinic/apyrimidinic endonuclease\/3'-repair diesterase APN1 [KOG3997]		NCoils: 0.05 (21/396)		0.01	0.02	0.02	0.04	0.04	0.04	0.04	0.04	0.02	21.42	21.9	54.99	21.9	19.53	19.85
WBGene00000155	W03G9.4	app-1	0	0	0	0	0	0	0	0	0	0	0	0	0	0	0	0.25	0.5	0.5	2	2	protein	616 aa	616				Creatinase_N [PF01321.17]; Creatinase_N_2 [PF16189.4]; Peptidase_M24 [PF00557.23]; Peptidase_M24_C [PF16188.4]	hydrolase activity [GO:0016787]	X-Prolyl aminopeptidase (aminopeptidase P) [meNOG00040]; Xaa-Pro aminopeptidase [COG0006]; Xaa-Pro aminopeptidase [KOG2413]				0.01	0.02	0.02	0.04	0.04	0.04	0.04	0.04	0.02	16.47	62.77	129.29	60.1	54.37	62.77
WBGene00000156	K04G2.8	2022-04-01	0	0	0.25	0	0	0	0	0	0	0	0	0.12	0.12	0.12	0.25	0.5	0.5	0.5	2	2	protein	1186-1188 aa	1188					adherens junction [GO:0005912]; asymmetric cell division [GO:0008356]; beta-catenin binding [GO:0008013]; binding [GO:0005488]; body morphogenesis [GO:0010171]; cell cortex [GO:0005938]; cell fate specification [GO:0001708]; cytoplasm [GO:0005737]; embryo development ending in birth or egg hatching [GO:0009792]; embryonic morphogenesis [GO:0048598]; endodermal cell fate specification [GO:0001714]…	Beta-catenin-binding protein APC, contains ARM repeats [KOG2122]; Polyposis coli protein [meNOG13554]		NCoils: 0.02 (21/1186); 0.02 (21/1188)	SEG: 0.13 (149/1186)	0.01	0.01	0.01	0.02	0.02	0.02	0.02	0.02	0.01	0.08	7.94	49.1	5.54	5.27	7.94
WBGene00000157	F02E8.3	aps-2	0.01	0	0.28	0	0	0	0.01	0	0	0	0	0.09	0.16	0.12	0.28	0.33	0.58	0.42	1.71	1.71	protein	142 aa	142				Clat_adaptor_s [PF01217.19]	AP-2 adaptor complex [GO:0030122]; body morphogenesis [GO:0010171]; cell [GO:0005623]; clathrin binding [GO:0030276]; embryo development ending in birth or egg hatching [GO:0009792]; growth [GO:0040007]; nematode larval development [GO:0002119]; protein transport [GO:0015031]; protein transporter activity [GO:0008565]; reproduction [GO:0000003]; transport [GO:0006810]	Clathrin adaptor complex, small subunit [COG5030]; Clathrin adaptor complex, small subunit [KOG0935]; Component of the adaptor protein complex 2 (AP-2). Adaptor protein complexes function in protein Transport via Transport vesicles in different membrane traffic pathways. Adaptor protein complexes are vesicle coat components and appear to be involved in cargo selection and vesicle formation. AP-2 …				0.04	0.07	0.05	0.12	0.12	0.12	0.12	0.12	0.07	0.43	20.29	46.86	20.29	16.24	19.2
WBGene00000158	Y105E8A.9	apg-1	0	0	0.04	0	0	0	0	0	0	0	0	0.04	0.04	0.04	0.04	1	1	1	1	1	protein	829 aa	829				Adaptin_N [PF01602.19]; Alpha_adaptinC2 [PF02883.19]; Cnd1 [PF12717.6]	Golgi apparatus [GO:0005794]; binding [GO:0005488]; clathrin adaptor complex [GO:0030131]; embryo development ending in birth or egg hatching [GO:0009792]; intracellular protein transport [GO:0006886]; locomotion [GO:0040011]; membrane coat [GO:0030117]; nematode larval development [GO:0002119]; protein binding [GO:0005515]; protein secretion [GO:0009306]; protein transport [GO:0015031]; protein …	Adaptor-Related protein complex 1, gamma [meNOG01586]; Vesicle coat complex AP-1, gamma subunit [KOG1062]		NCoils: 0.03 (21/829)	SEG: 0.04 (34/829)	0.01	0.01	0.01	0.01	0.01	0.01	0.01	0.01	0.01	0.25	36.86	41.48	36.86	32.59	35.01
WBGene00000159	F29G9.3	aps-1	0.01	0	0.01	0	0.01	0	0	0	0	0	0	0	0.01	0	0	0.34	2.94	0.11	0.23	2.94	protein	157 aa	157	Housekeeping			Clat_adaptor_s [PF01217.19]	embryo development ending in birth or egg hatching [GO:0009792]; locomotion [GO:0040011]; nematode larval development [GO:0002119]; protein transport [GO:0015031]; protein transporter activity [GO:0008565]; reproduction [GO:0000003]; transport [GO:0006810]	Adaptor-Related protein complex 1, sigma [meNOG06972]; Clathrin adaptor complex, small subunit [COG5030]; Clathrin adaptor complex, small subunit [KOG0934]				0.16	0.47	0.05	0.11	0.47	0.47	0.16	0.47	0.47	58.08	90.35	104.9	90.35	77.88	86.2
WBGene00000160	Y71H2B.10	apb-1	0	0	0.15	0	0	0	0	0	0	0	0	0.15	0.09	0.06	0.15	1	0.6	0.4	1	1	protein	226-955 aa	955				Adaptin_N [PF01602.19]; Alpha_adaptinC2 [PF02883.19]; Arm [PF00514.22]; B2-adapt-app_C [PF09066.9]; Cnd1 [PF12717.6]; HEAT [PF02985.21]; HEAT_2 [PF13646.5]	apoptotic process [GO:0006915]; binding [GO:0005488]; clathrin adaptor complex [GO:0030131]; embryo development ending in birth or egg hatching [GO:0009792]; intracellular protein transport [GO:0006886]; membrane coat [GO:0030117]; nematode larval development [GO:0002119]; protein transport [GO:0015031]; protein transporter activity [GO:0008565]; receptor-mediated endocytosis [GO:0006898]; reprod…	Adaptor-Related protein complex 2, beta 1 subunit [meNOG05647]; Vesicle coat complex AP-1/AP-2\/AP-4, beta subunit [KOG1061]; Vesicle coat complex, various subunits [COG5096]			SEG: 0.11 (24/226)	0.1	0.06	0.04	0.1	0.1	0.1	0.1	0.1	0.1	0.66	42.04	53.13	35.12	34.19	42.04
WBGene00000161	T20B5.1	apa-2	0	0	1	0	0	0	0	0	0	0	0	0.33	0.33	0.33	1	0.33	0.33	0.33	3	3	protein	925 aa	925				Adaptin_N [PF01602.19]; Alpha_adaptinC2 [PF02883.19]; Alpha_adaptin_C [PF02296.15]; Cnd1 [PF12717.6]	GTPase activating protein binding [GO:0032794]; binding [GO:0005488]; clathrin adaptor complex [GO:0030131]; clathrin-coated endocytic vesicle [GO:0045334]; embryo development ending in birth or egg hatching [GO:0009792]; endocytic vesicle [GO:0030139]; intracellular protein transport [GO:0006886]; locomotion [GO:0040011]; membrane [GO:0016020]; membrane coat [GO:0030117]; plasma membrane [GO:000…	Component of the adaptor protein complex 2 (AP-2). Adaptor protein complexes function in protein transport via transport vesicles in different membrane traffic pathways. Adaptor protein complexes are vesicle coat components and appear to be involved in cargo selection and vesicle formation. AP-2 is involved in clathrin-dependent endocytosis in which cargo proteins are incorporated into vesicles s…		NCoils: 0.02 (21/925)	SEG: 0.03 (26/925)	0.01	0.01	0.01	0.03	0.03	0.03	0.03	0.03	0.01	0.03	10.13	19.68	8.97	9.55	10.13
WBGene00000162	W09G10.4	apd-3	0	0	0.1	0	0	0	0	0	0	0	0	0.05	0.05	0.05	0.1	0.5	0.5	0.5	2	2	protein	979-1251 aa	1251				AP3D1 [PF06375.10]; Adaptin_N [PF01602.19]; Cnd1 [PF12717.6]	Golgi apparatus [GO:0005794]; binding [GO:0005488]; body morphogenesis [GO:0010171]; embryo development ending in birth or egg hatching [GO:0009792]; intracellular protein transport [GO:0006886]; membrane coat [GO:0030117]; nematode larval development [GO:0002119]; protein transport [GO:0015031]; protein transporter activity [GO:0008565]; vesicle-mediated transport [GO:0016192]	Related protein complex 3, delta 1 subunit [meNOG07452]; Vesicle coat complex AP-3, delta subunit [KOG1059]; Vesicle coat complex, various subunits [COG5096]			SEG: 0.17 (170/979)	0.01	0.01	0.01	0.02	0.02	0.02	0.02	0.02	0.01	0.21	4.02	20.71	4.02	3.9	3.85
WBGene00000163	R11A5.1	apb-3	0	0	0.07	0	0	0	0	0	0	0	0	0.02	0.05	0.02	0.07	0.33	0.67	0.33	1.5	1.5	protein	935-945 aa	945				AP3B1_C [PF14796.5]; Adaptin_N [PF01602.19]; Cnd1 [PF12717.6]	AP-3 adaptor complex [GO:0030123]; binding [GO:0005488]; body morphogenesis [GO:0010171]; embryo development ending in birth or egg hatching [GO:0009792]; intracellular protein transport [GO:0006886]; lipid storage [GO:0019915]; lysosome organization [GO:0007040]; membrane coat [GO:0030117]; nematode larval development [GO:0002119]; vesicle-mediated transport [GO:0016192]			NCoils: 0.05 (51/945); 0.05 (51/935)	SEG: 0.13 (117/935)	0.01	0.02	0.01	0.03	0.03	0.03	0.03	0.03	0.02	0.4	10.15	47.04	8.83	8.83	10.15
WBGene00000164	F53H8.1	apm-3	0.01	0	0.05	0	0	0	0.01	0	0	0	0	0.02	0.03	0.02	0.05	0.33	0.67	0.33	1.5	1.5	protein	414 aa	414				Adap_comp_sub [PF00928.20]; Clat_adaptor_s [PF01217.19]	body morphogenesis [GO:0010171]; clathrin adaptor complex [GO:0030131]; embryo development ending in birth or egg hatching [GO:0009792]; intracellular protein transport [GO:0006886]; lipid storage [GO:0019915]; lysosome organization [GO:0007040]; nematode larval development [GO:0002119]; protein binding [GO:0005515]; transport [GO:0006810]; vesicle-mediated transport [GO:0016192]	Adaptor-Related protein complex 3, mu [meNOG04382]; Clathrin-associated protein medium chain [KOG2740]				0.01	0.02	0.01	0.03	0.03	0.03	0.03	0.03	0.02	0.65	4.43	12.98	2.71	4.43	4.06
WBGene00000165	Y48G8AL.14	aps-3	0	0	1.11	0	0	0	0	0	0	0	0	0.44	0.67	0.44	1.11	0.4	0.6	0.4	1.67	1.67	protein	192 aa	192				Clat_adaptor_s [PF01217.19]	AP-3 adaptor complex [GO:0030123]; apoptotic process [GO:0006915]; body morphogenesis [GO:0010171]; embryo development ending in birth or egg hatching [GO:0009792]; nematode larval development [GO:0002119]; oogenesis [GO:0048477]; protein transport [GO:0015031]; protein transporter activity [GO:0008565]; reproduction [GO:0000003]; transport [GO:0006810]	Adaptor-Related protein complex 3, sigma [meNOG07026]; Clathrin adaptor complex, small subunit [COG5030]; Clathrin adaptor complex, small subunit [KOG0936]				0.04	0.06	0.04	0.1	0.1	0.1	0.1	0.1	0.06	0.09	36.36	106.07	34.41	31.55	36.36
WBGene00000166	W04G3.4	apt-9	0.02	0.05	1	0.01	0.01	0.01	0.02	0.03	0.03	0.03	0.05	0.5	0.5	0.5	1	0.5	0.5	0.5	2	2	protein	588 aa	588				VHS [PF00790.18]	intracellular protein transport [GO:0006886]; protein N-terminus binding [GO:0047485]; protein secretion [GO:0009306]	Cytosolic sorting protein/ADP-ribosylation factor effector GGA [KOG1086]; Golgi associated, gamma adaptin ear containing, ARF binding protein [meNOG02442]			SEG: 0.02 (12/588)	0.01	0.01	0.01	0.02	0.02	0.02	0.02	0.02	0.01	0.02	1.2	0.37	0.92	1.2	0.96
WBGene00000168	K08D9.3	apx-1	0	0	0.04	0	0	0	0	0	0	0	0	0.02	0.02	0.02	0.04	0.5	0.5	0.5	2	2	protein	515 aa	515				DSL [PF01414.18]; EGF [PF00008.26]; EGF_2 [PF07974.12]	cell communication [GO:0007154]; embryo development ending in birth or egg hatching [GO:0009792]; embryonic pattern specification [GO:0009880]; lateral inhibition [GO:0046331]; membrane [GO:0016020]; morphogenesis of embryonic epithelium [GO:0016331]; protein binding [GO:0005515]; regulation of cell proliferation [GO:0042127]; regulation of meiosis [GO:0040020]; regulation of vulval development […	Fibrillins and related proteins containing Ca2+-binding EGF-like domains [KOG1217]	SigP+TM(1x)		SEG: 0.08 (39/515)	0.01	0.01	0.01	0.02	0.02	0.02	0.02	0.02	0.01	0.56	9.15	62.41	8.95	7.72	9.15
WBGene00000169	F32A5.5	aqp-1	0	0	0.38	0	0	0	0	0	0	0	0	0.13	0.22	0.16	0.38	0.35	0.59	0.41	1.7	1.7	protein	295-304 aa	304				MIP [PF00230.19]	basolateral plasma membrane [GO:0016323]; defense response to Gram-negative bacterium [GO:0050829]; determination of adult lifespan [GO:0008340]; glycerol transport [GO:0015793]; innate immune response [GO:0045087]; membrane [GO:0016020]; substrate-specific channel activity [GO:0022838]; transport [GO:0006810]; transporter activity [GO:0005215]	Aquaporin (major intrinsic protein family) [KOG0224]; Glycerol uptake facilitator and related permeases (Major Intrinsic Protein Family) [COG0580]	TM(6x)		SEG: 0.04 (11/304)	0.06	0.1	0.07	0.17	0.17	0.17	0.17	0.17	0.1	0.45	40.43	51.43	29.17	34.78	40.43
WBGene00000170	C01G6.1	aqp-2	0.01	0.01	0.27	0	0	0	0.01	0	0	0	0.01	0.09	0.16	0.11	0.27	0.33	0.59	0.41	1.69	1.69	protein	285-290 aa	290				MIP [PF00230.19]	membrane [GO:0016020]; transport [GO:0006810]; transporter activity [GO:0005215]; water channel activity [GO:0015250]; water transport [GO:0006833]	Aquaporin (major intrinsic protein family) [KOG0224]; Aquaporin protein [meNOG04232]; Glycerol uptake facilitator and related permeases (Major Intrinsic Protein Family) [COG0580]	TM(6x)		SEG: 0.07 (21/290)	0.09	0.16	0.11	0.27	0.27	0.27	0.27	0.27	0.16	0.99	46	37.63	27.85	37.06	46
WBGene00000171	Y69E1A.7	aqp-3	0.01	0.09	1.12	0	0.01	0	0.01	0.03	0.05	0.04	0.09	0.38	0.62	0.5	1.12	0.33	0.56	0.44	1.8	1.8	protein	322-421 aa	421				MIP [PF00230.19]	glycerol transport [GO:0015793]; membrane [GO:0016020]; substrate-specific channel activity [GO:0022838]; transport [GO:0006810]; transporter activity [GO:0005215]; water channel activity [GO:0015250]; water transport [GO:0006833]	Aquaporin (major intrinsic protein family) [KOG0224]; Aquaporin 7 protein [meNOG12366]; Glycerol uptake facilitator and related permeases (Major Intrinsic Protein Family) [COG0580]	TM(6x)		SEG: 0.03 (11/421)	0.03	0.05	0.04	0.09	0.09	0.09	0.09	0.09	0.05	0.08	8.03	0.96	7.46	6.46	8.03
WBGene00000172	F40F9.9	aqp-4	0	0	0	0	0	0	0	0	0	0	0	0	0	0	0	0.33	0.5	0.33	2	2	protein	273 aa	273				MIP [PF00230.19]	apical plasma membrane [GO:0016324]; membrane [GO:0016020]; plasma membrane [GO:0005886]; transport [GO:0006810]; transporter activity [GO:0005215]; water channel activity [GO:0015250]; water transport [GO:0006833]	Aquaporin (major intrinsic protein family) [KOG0223]; Aquaporin 8 protein [meNOG10438]; Glycerol uptake facilitator and related permeases (Major Intrinsic Protein Family) [COG0580]	TM(6x)			0.02	0.03	0.02	0.06	0.06	0.06	0.06	0.06	0.03	13.12	19.25	16.42	18.29	18.31	19.25
WBGene00000173	C35A5.1	aqp-5	0.13	0.24	0.11	0.05	0.08	0.05	0.13	0.1	0.14	0.1	0.24	0.04	0.06	0.04	0.11	0.4	0.6	0.4	1.67	1.67	protein	316 aa	316				MIP [PF00230.19]	cell surface [GO:0009986]; membrane [GO:0016020]; transport [GO:0006810]; transporter activity [GO:0005215]	Aquaporin (major intrinsic protein family) [KOG0223]; Glycerol uptake facilitator and related permeases (Major Intrinsic Protein Family) [COG0580]	TM(5x)		SEG: 0.04 (12/316)	0.02	0.03	0.02	0.05	0.05	0.05	0.05	0.05	0.03	0.47	0.39	0.21	0.34	0.37	0.39
WBGene00000174	C32C4.2	aqp-6	0.06	0.31	1	0.02	0.03	0.02	0.06	0.11	0.19	0.13	0.31	0.35	0.6	0.42	1	0.35	0.6	0.42	1.68	1.68	protein	44-291 aa	291				MIP [PF00230.19]	cilium [GO:0005929]; membrane [GO:0016020]; neuronal cell body [GO:0043025]; transport [GO:0006810]; transporter activity [GO:0005215]; water channel activity [GO:0015250]; water transport [GO:0006833]	Aquaporin (major intrinsic protein family) [KOG0223]; Aquaporin 4 protein [meNOG01351]; Glycerol uptake facilitator and related permeases (Major Intrinsic Protein Family) [COG0580]	TM(5x)		SEG: 0.06 (15/244)	0.2	0.34	0.24	0.57	0.57	0.57	0.57	0.57	0.34	0.57	10.18	1.82	8.77	8.1	10.18
WBGene00000175	M02F4.8	aqp-7	0	0	0	0	0	0	0	0	0	0	0	0	0	0	0	3	0.15	0.33	0.27	3	protein	291 aa	291	Housekeeping			MIP [PF00230.19]	glycerol transport [GO:0015793]; membrane [GO:0016020]; substrate-specific channel activity [GO:0022838]; transport [GO:0006810]; transporter activity [GO:0005215]; water channel activity [GO:0015250]; water transport [GO:0006833]	Aquaporin (major intrinsic protein family) [KOG0224]; Aquaporin protein [meNOG04232]; Glycerol uptake facilitator and related permeases (Major Intrinsic Protein Family) [COG0580]	TM(6x)		SEG: 0.09 (26/291)	0.33	0.05	0.11	0.09	0.33	0.11	0.33	0.33	0.33	113.43	266.67	178.39	178.54	266.67	247.14
WBGene00000176	K02G10.7	aqp-8	0.01	0.01	0.11	0.01	0	0	0	0.01	0	0	0	0.11	0.02	0.01	0.03	3.7	0.16	0.11	0.27	3.7	protein	258-294 aa	294				MIP [PF00230.19]	cell surface [GO:0009986]; membrane [GO:0016020]; transport [GO:0006810]; transporter activity [GO:0005215]	Aquaporin (major intrinsic protein family) [KOG0224]; Aquaporin 10 protein [meNOG16734]; Glycerol uptake facilitator and related permeases (Major Intrinsic Protein Family) [COG0580]	TM(4x); TM(6x)			0.37	0.06	0.04	0.1	0.37	0.1	0.37	0.37	0.37	3.22	42.22	29.68	34.41	42.22	37.73
WBGene00000177	K07A1.16	aqp-9	0.01	0.02	0.19	0	0	0	0.01	0.01	0.01	0.01	0.02	0.06	0.11	0.07	0.19	0.33	0.6	0.4	1.67	1.67	protein	63-269 aa	269						Aquaporin protein [euNOG00186]; Aquaporin protein [meNOG00456]	TM(1x); TM(7x)		SEG: 0.24 (15/63)	0.05	0.09	0.06	0.15	0.15	0.15	0.15	0.15	0.09	0.8	22.25	7.23	22.08	22.25	21.48
WBGene00000178	ZK1321.3	aqp-10	0	0	0.01	0	0	0	0	0	0	0	0	0	0	0	0.01	0.33	0.5	0.33	2	2	protein	280 aa	280					innate immune response [GO:0045087]	Aquaporin [TWOG0022]; Aquaporin protein [euNOG00186]	TM(7x)		SEG: 0.07 (21/280)	0.02	0.03	0.02	0.06	0.06	0.06	0.06	0.06	0.03	11.41	34.06	49.24	34.06	31.27	30.94
WBGene00000179	ZK525.2	aqp-11	0	0	0.12	0	0	0	0	0	0	0	0	0.04	0.08	0.06	0.12	0.33	0.67	0.5	1.5	1.5	protein	279 aa	279						Aquaporin [TWOG0022]; Aquaporin protein [euNOG00186]; Aquaporin protein [meNOG00456]	TM(3x)		SEG: 0.08 (21/279)	0.02	0.04	0.03	0.06	0.06	0.06	0.06	0.06	0.04	0.49	39.68	41.44	39.68	38.92	33.1
WBGene00000180	ZK1320.6	arc-1	0	0	0.02	0	0	0	0	0	0	0	0	0.01	0.01	0.01	0.02	0.33	0.67	0.33	1.5	1.5	protein	539 aa	539				Arf [PF00025.20]; Gtr1_RagA [PF04670.11]; MMR_HSR1 [PF01926.22]; Ras [PF00071.21]; Roc [PF08477.12]; SRPRB [PF09439.9]; zf-B_box [PF00643.23]; zf-RING_UBOX [PF13445.5]	GTP binding [GO:0005525]; intracellular [GO:0005622]; intracellular protein transport [GO:0006886]; protein binding [GO:0005515]; protein transport [GO:0015031]; small GTPase mediated signal transduction [GO:0007264]; zinc ion binding [GO:0008270]	GTP-binding ADP-ribosylation factor Arf1 [KOG0070]; GTPase SAR1 and related small G proteins [COG1100]; Predicted E3 ubiquitin ligase [KOG4185]; Tripartite motif-containing 23 protein [meNOG08634]		NCoils: 0.09 (49/539)		0.01	0.02	0.01	0.03	0.03	0.03	0.03	0.03	0.02	1.53	10.16	7.23	8.96	10.16	9.12
WBGene00000181	F01G4.2	ard-1	0	0	0	0	0	0	0	0	0	0	0	0	0	0	0	0.25	1.39	0.31	0.72	1.39	protein	84-258 aa	258	Housekeeping			KR [PF08659.9]; adh_short [PF00106.24]; adh_short_C2 [PF13561.5]	hermaphrodite genitalia development [GO:0040035]; locomotion [GO:0040011]; metabolic process [GO:0008152]; nematode larval development [GO:0002119]; oxidoreductase activity [GO:0016491]; reproduction [GO:0000003]	Dehydrogenase [meNOG08583]; Dehydrogenases with different specificities (related to short-chain alcohol dehydrogenases) [COG1028]; Short-chain alcohol dehydrogenase/3-hydroxyacyl-CoA dehydrogenase [KOG1199]	SigP			0.08	0.32	0.1	0.23	0.32	0.32	0.23	0.32	0.32	116.63	111.94	205.04	98.98	111.94	109.8
WBGene00000182	B0336.2	arf-1.2	0.04	0.04	0.2	0.04	0	0.02	0	0.04	0	0.01	0	0.2	0	0.07	0	2.77	0.01	0.36	0.01	2.77	protein	181 aa	181	Housekeeping			Arf [PF00025.20]; Gtr1_RagA [PF04670.11]; MMR_HSR1 [PF01926.22]; Ras [PF00071.21]; Roc [PF08477.12]; SRPRB [PF09439.9]	GTP binding [GO:0005525]; apoptotic process [GO:0006915]; asymmetric cell division [GO:0008356]; embryo development ending in birth or egg hatching [GO:0009792]; hermaphrodite genitalia development [GO:0040035]; intracellular [GO:0005622]; intracellular protein transport [GO:0006886]; locomotion [GO:0040011]; nematode larval development [GO:0002119]; oocyte development [GO:0048599]; protein trans…	Adp-Ribosylation factor [meNOG00911]; GTP-binding ADP-ribosylation factor Arf1 [KOG0070]; GTPase SAR1 and related small G proteins [COG1100]				12.7	0.08	4.59	0.09	12.7	4.59	12.7	12.7	12.7	64.4	286.88	321.1	240.88	266.92	286.88
WBGene00000183	F57H12.1	arf-3	0.01	0.01	0.04	0.01	0	0	0	0.01	0	0	0	0.04	0	0	0	32.83	0.01	0.03	0.03	32.83	protein	180 aa	180	Housekeeping			Arf [PF00025.20]; G-alpha [PF00503.19]; Gtr1_RagA [PF04670.11]; MMR_HSR1 [PF01926.22]; Ras [PF00071.21]; Roc [PF08477.12]; SRPRB [PF09439.9]	GTP binding [GO:0005525]; asymmetric cell division [GO:0008356]; body morphogenesis [GO:0010171]; embryo development ending in birth or egg hatching [GO:0009792]; germ cell development [GO:0007281]; growth [GO:0040007]; hermaphrodite genitalia development [GO:0040035]; inductive cell migration [GO:0040039]; intracellular [GO:0005622]; intracellular protein transport [GO:0006886]; locomotion [GO:0…	Adp-Ribosylation factor [meNOG03954]; GTP-binding ADP-ribosylation factor Arf1 [KOG0070]; GTPase SAR1 and related small G proteins [COG1100]		NCoils: 0.12 (21/180)		3.94	0.04	0.12	0.12	3.94	0.12	3.94	3.94	3.94	90.1	448.35	372.84	356.39	424.17	448.35
WBGene00000184	Y116A8C.12	arf-6	0.03	0.02	1.61	0.03	0	0	0	0.02	0	0	0	1.61	0.09	0.06	0.14	11.27	0.06	0.04	0.09	11.27	protein	175 aa	175				Arf [PF00025.20]; Gtr1_RagA [PF04670.11]; Ras [PF00071.21]; Roc [PF08477.12]; SRPRB [PF09439.9]	GTP binding [GO:0005525]; asymmetric cell division [GO:0008356]; embryo development ending in birth or egg hatching [GO:0009792]; endomembrane system [GO:0012505]; intracellular [GO:0005622]; intracellular protein transport [GO:0006886]; protein transport [GO:0015031]; small GTPase mediated signal transduction [GO:0007264]				SEG: 0.09 (16/175)	1.24	0.07	0.05	0.11	1.24	0.11	1.24	1.24	1.24	0.77	47.17	68.36	47.17	37.85	40.21
WBGene00000185	F31A9.3	arg-1	0.62	0.83	1.11	0.25	0.38	0.25	0.62	0.33	0.5	0.33	0.83	0.44	0.67	0.44	1.11	0.4	0.6	0.4	1.67	1.67	protein	349-357 aa	357				DSL [PF01414.18]; EGF [PF00008.26]	cell communication [GO:0007154]; membrane [GO:0016020]; protein binding [GO:0005515]; regulation of cell proliferation [GO:0042127]; regulation of meiosis [GO:0040020]	Delta-Like protein [meNOG04803]; Fibrillins and related proteins containing Ca2+-binding EGF-like domains [KOG1217]	SigP; SigP+TM(1x)			0.04	0.06	0.04	0.1	0.1	0.1	0.1	0.1	0.06	0.09	0.16	0.12	0.11	0.13	0.16
WBGene00000186	C01C7.1	ark-1	0	0	0.04	0	0	0	0	0	0	0	0	0.02	0.02	0.02	0.04	0.5	0.5	0.5	2	2	protein	1039-1043 aa	1043				PBD [PF00786.27]; Pkinase [PF00069.24]; Pkinase_Tyr [PF07714.16]; SH3_2 [PF07653.16]	embryo development ending in birth or egg hatching [GO:0009792]; germ cell development [GO:0007281]; negative regulation of epidermal growth factor receptor signaling pathway [GO:0042059]; negative regulation of vulval development [GO:0040027]; protein binding [GO:0005515]; protein kinase activity [GO:0004672]; protein phosphorylation [GO:0006468]; protein tyrosine kinase activity [GO:0004713]; t…	ACK and related non-receptor tyrosine kinases [KOG0199]; Protein tyrosine kinase [meNOG05849]; Serine/threonine protein kinase [COG0515]		NCoils: 0.04 (42/1043); 0.04 (42/1039)	SEG: 0.17 (181/1043)	0.01	0.01	0.01	0.02	0.02	0.02	0.02	0.02	0.01	0.52	7.25	19.94	6.71	6.1	7.25
WBGene00000187	F54C9.10	arl-1	0	0	0.01	0	0	0	0	0	0	0	0	0.01	0.01	0.01	0.01	0.36	0.64	0.45	1.57	1.57	protein	180 aa	180				Arf [PF00025.20]; Gtr1_RagA [PF04670.11]; MMR_HSR1 [PF01926.22]; Ras [PF00071.21]; Roc [PF08477.12]; SRPRB [PF09439.9]	GTP binding [GO:0005525]; embryo development ending in birth or egg hatching [GO:0009792]; intracellular [GO:0005622]; intracellular protein transport [GO:0006886]; protein transport [GO:0015031]; receptor-mediated endocytosis [GO:0006898]; small GTPase mediated signal transduction [GO:0007264]	Adp-Ribosylation factor-like [meNOG00820]; GTP-binding ADP-ribosylation factor-like protein ARL1 [KOG0072]; GTPase SAR1 and related small G proteins [COG1100]				0.04	0.07	0.05	0.11	0.11	0.11	0.11	0.11	0.07	7.54	51.22	46.31	49.47	41.17	51.22
WBGene00000188	F19H8.3	arl-3	0.03	0.06	0.05	0.01	0.02	0.01	0.03	0.02	0.04	0.02	0.06	0.02	0.03	0.02	0.05	0.38	0.62	0.38	1.62	1.62	protein	184 aa	184				Arf [PF00025.20]; G-alpha [PF00503.19]; Gtr1_RagA [PF04670.11]; MMR_HSR1 [PF01926.22]; Ras [PF00071.21]; Roc [PF08477.12]; SRPRB [PF09439.9]	GTP binding [GO:0005525]; determination of adult lifespan [GO:0008340]; intracellular [GO:0005622]; intracellular protein transport [GO:0006886]; protein transport [GO:0015031]; small GTPase mediated signal transduction [GO:0007264]	Adp-Ribosylation factor-like [meNOG04800]; GTP-binding ADP-ribosylation factor-like protein ARL3 [KOG0074]; GTPase SAR1 and related small G proteins [COG1100]				0.05	0.08	0.05	0.13	0.13	0.13	0.13	0.13	0.08	2.48	4.08	2.19	3.95	4.08	2.8
WBGene00000189	ZK632.8	arl-5	0.02	0	0.01	0.02	0.01	0.01	0.01	0	0	0	0	0.01	0	0	0.01	1.33	0.42	0.33	0.75	1.33	protein	178 aa	178				Arf [PF00025.20]; Gtr1_RagA [PF04670.11]; MMR_HSR1 [PF01926.22]; Ras [PF00071.21]; Roc [PF08477.12]; SRPRB [PF09439.9]	GTP binding [GO:0005525]; embryo development ending in birth or egg hatching [GO:0009792]; germline cell cycle switching, mitotic to meiotic cell cycle [GO:0051729]; gonad development [GO:0008406]; intracellular [GO:0005622]; intracellular protein transport [GO:0006886]; microtubule cytoskeleton organization [GO:0000226]; negative regulation of vulval development [GO:0040027]; nematode larval dev…	Adp-Ribosylation factor-like [meNOG02454]; GTP-binding ADP-ribosylation factor Arf1 [KOG0070]; GTPase SAR1 and related small G proteins [COG1100]			SEG: 0.08 (14/178)	0.12	0.05	0.04	0.09	0.12	0.09	0.12	0.12	0.12	14.8	7.15	36.16	7.15	5.09	5.96
WBGene00000190	F45E4.1	arf-1.1	0	0.03	0.02	0	0	0	0	0.01	0.02	0.01	0.03	0.01	0.01	0.01	0.02	0.3	0.6	0.4	1.67	1.67	protein	179 aa	179				Arf [PF00025.20]; Gtr1_RagA [PF04670.11]; Ras [PF00071.21]; Roc [PF08477.12]; SRPRB [PF09439.9]	GTP binding [GO:0005525]; endoplasmic reticulum unfolded protein response [GO:0030968]; intracellular [GO:0005622]; intracellular protein transport [GO:0006886]; small GTPase mediated signal transduction [GO:0007264]	Adp-Ribosylation factor [meNOG00911]; GTP-binding ADP-ribosylation factor Arf1 [KOG0070]; GTPase SAR1 and related small G proteins [COG1100]				0.03	0.06	0.04	0.1	0.1	0.1	0.1	0.1	0.06	4.67	26.14	2.94	26.14	22.16	18.28
WBGene00000192	Y57G11C.13	arl-8	0	0	0	0	0	0	0	0	0	0	0	0	0	0	0	0.4	0.6	0.4	1.67	1.67	protein	185 aa	185				Arf [PF00025.20]; Gtr1_RagA [PF04670.11]; MMR_HSR1 [PF01926.22]; Ras [PF00071.21]; Roc [PF08477.12]; SRPRB [PF09439.9]	GTP binding [GO:0005525]; GTP catabolic process [GO:0006184]; axon cargo transport [GO:0008088]; determination of adult lifespan [GO:0008340]; embryo development ending in birth or egg hatching [GO:0009792]; endosome to lysosome transport [GO:0008333]; intracellular [GO:0005622]; intracellular protein transport [GO:0006886]; lysosome [GO:0005764]; membrane [GO:0016020]; presynaptic active zone [G…	Adp-Ribosylation factor-like [meNOG02497]; GTP-binding ADP-ribosylation factor-like protein [KOG0075]; GTPase SAR1 and related small G proteins [COG1100]				0.02	0.03	0.02	0.05	0.05	0.05	0.05	0.05	0.03	10.29	55.07	186.69	40.63	45.82	55.07
WBGene00000193	C38D4.8	arl-6	0.09	0.26	1.09	0.03	0.05	0.04	0.09	0.09	0.15	0.11	0.26	0.36	0.64	0.45	1.09	0.33	0.58	0.42	1.71	1.71	protein	190 aa	190				Arf [PF00025.20]; Gtr1_RagA [PF04670.11]; MMR_HSR1 [PF01926.22]; Ras [PF00071.21]; Roc [PF08477.12]; SRPRB [PF09439.9]	GTP binding [GO:0005525]; GTPase activity [GO:0003924]; axoneme [GO:0005930]; cytosol [GO:0005829]; dendrite [GO:0030425]; intracellular [GO:0005622]; intracellular protein transport [GO:0006886]; intracellular transport [GO:0046907]; protein transport [GO:0015031]; small GTPase mediated signal transduction [GO:0007264]	Adp-Ribosylation factor-like [meNOG04439]; GTP-binding ADP-ribosylation factor Arf1 [KOG0070]; GTPase SAR1 and related small G proteins [COG1100]			SEG: 0.07 (13/190)	0.04	0.07	0.05	0.12	0.12	0.12	0.12	0.12	0.07	0.11	1.34	0.47	1.21	1.16	1.34
WBGene00000195	F53H8.2	arr-1	0.01	0	0.01	0	0.01	0	0	0	0	0	0	0	0.01	0	0.01	0.25	1.33	0.25	0.75	1.33	protein	435 aa	435				Arrestin_C [PF02752.21]; Arrestin_N [PF00339.28]	multicellular organismal process [GO:0032501]; positive regulation of growth rate [GO:0040010]; signal transduction [GO:0007165]	Arrestin [KOG3865]; Functions in regulating agonist-mediated G-protein coupled receptor (GPCR) signaling by mediating both receptor desensitization and resensitization processes. During homologous desensitization, beta-arrestins bind to the GPRK-phosphorylated receptor and sterically preclude its coupling to the cognate G- protein\; the binding appears to require additional receptor determinants …			SEG: 0.03 (12/435)	0.01	0.04	0.01	0.03	0.04	0.04	0.03	0.04	0.04	4.21	6.93	14.23	5.29	6.93	5.21
WBGene00000196	W02B12.6	aars-1	0	0	0.01	0	0	0	0	0	0	0	0	0	0.01	0	0.01	0.25	0.5	0.25	2	2	protein; ncRNA	793 aa	793				tRNA-synt_2c [PF01411.18]; tRNA_SAD [PF07973.13]	ATP binding [GO:0005524]; alanine-tRNA ligase activity [GO:0004813]; alanyl-tRNA aminoacylation [GO:0006419]; cytoplasm [GO:0005737]; ligase activity, forming aminoacyl-tRNA and related compounds [GO:0016876]; nucleotide binding [GO:0000166]; receptor-mediated endocytosis [GO:0006898]; reproduction [GO:0000003]; tRNA aminoacylation [GO:0043039]	Alanyl-Trna synthetase [meNOG00443]; Alanyl-tRNA synthetase [COG0013]; Alanyl-tRNA synthetase [KOG0188]				0.01	0.02	0.01	0.04	0.04	0.04	0.04	0.04	0.02	3.94	8.42	14.65	8.42	6.9	7.21
WBGene00000197	F28H1.3	aars-2	0	0	0	0	0	0	0	0	0	0	0	0	0	0	0	1	0.5	0.5	1	1	protein	968 aa	968				DHHA1 [PF02272.18]; tRNA-synt_2c [PF01411.18]; tRNA_SAD [PF07973.13]	ATP binding [GO:0005524]; alanine-tRNA ligase activity [GO:0004813]; alanyl-tRNA aminoacylation [GO:0006419]; cytoplasm [GO:0005737]; embryo development ending in birth or egg hatching [GO:0009792]; ligase activity, forming aminoacyl-tRNA and related compounds [GO:0016876]; locomotion [GO:0040011]; nematode larval development [GO:0002119]; nucleic acid binding [GO:0003676]; nucleotide binding [GO…	Alanyl-Trna synthetase [meNOG00443]; Alanyl-tRNA synthetase [COG0013]; Alanyl-tRNA synthetase [KOG0188]		NCoils: 0.02 (21/968)		0.04	0.02	0.02	0.04	0.04	0.04	0.04	0.04	0.04	13.18	40.48	129.76	40.3	37.03	40.48
WBGene00000198	C15F1.6	art-1	0.02	0.01	0.02	0.01	0.02	0.01	0	0.01	0.01	0	0	0.02	0.02	0.01	0	0.66	1.51	0.25	0.02	1.51	protein	308 aa	308	Housekeeping			Steroid_dh [PF02544.15]; ubiquitin [PF00240.22]	cytoplasm [GO:0005737]; integral component of membrane [GO:0016021]; lipid metabolic process [GO:0006629]; oxidoreductase activity, acting on the CH-CH group of donors [GO:0016627]; protein binding [GO:0005515]	Steroid reductase required for elongation of the very long chain fatty acids [KOG1639]; Trans-2,3-Enoyl-Coa reductase [meNOG04523]	TM(4x)	NCoils: 0.08 (25/308)	SEG: 0.05 (15/308)	1.74	2.62	0.65	0.05	2.62	2.62	1.74	2.62	2.62	113.31	129.39	246.92	116.14	119.25	129.39
WBGene00000199	Y71F9AL.16	arx-1	0	0	0.38	0	0	0	0	0	0	0	0	0.12	0.25	0.12	0.38	0.33	0.67	0.33	1.5	1.5	protein	425 aa	425				Actin [PF00022.18]	Arp2/3 complex-mediated actin nucleation [GO:0034314]; cell leading edge [GO:0031252]; cytoplasm [GO:0005737]; embryo development ending in birth or egg hatching [GO:0009792]; epithelial cell migration [GO:0010631]; morphogenesis of embryonic epithelium [GO:0016331]	Actin and related proteins [COG5277]; Actin-Related protein 3 [meNOG04424]; Actin-related protein Arp2/3 complex, subunit Arp3 [KOG0678]				0.01	0.02	0.01	0.03	0.03	0.03	0.03	0.03	0.02	0.08	32.5	67.3	32.5	29.43	28.91
WBGene00000200	K07C5.1	arx-2	0.03	0.01	0.01	0.02	0.03	0.01	0	0.01	0.01	0	0	0.01	0.01	0	0	0.65	1.54	0.21	0.03	1.54	protein	395 aa	395	Housekeeping			Actin [PF00022.18]	Arp2/3 complex-mediated actin nucleation [GO:0034314]; embryo development [GO:0009790]; embryo development ending in birth or egg hatching [GO:0009792]; engulfment of apoptotic cell [GO:0043652]; epithelial cell migration [GO:0010631]; locomotion [GO:0040011]; meiotic nuclear division [GO:0007126]; morphogenesis of embryonic epithelium [GO:0016331]; nematode larval development [GO:0002119]; recep…	Actin and related proteins [COG5277]; Actin-related protein Arp2/3 complex, subunit Arp2 [KOG0677]; Functions as ATP-binding component of the Arp2\/3 complex which is involved in regulation of actin polymerization and together with an activating nucleation-promoting factor (NPF) mediates the formation of branched actin networks. Seems to contact the pointed end of the daughter actin filament [meN…			SEG: 0.04 (15/395)	0.76	1.17	0.25	0.03	1.17	1.17	0.76	1.17	1.17	86.48	40.1	86.98	40.1	37.03	38.69
WBGene00000201	Y79H2A.6	arx-3	0.02	0.01	0.06	0.02	0	0	0	0.01	0	0	0	0.06	0	0	0	25	0.02	0.02	0.04	25	protein	368 aa	368	Housekeeping			ANAPC4_WD40 [PF12894.6]; WD40 [PF00400.31]	actin binding [GO:0003779]; cytoskeleton [GO:0005856]; embryo development ending in birth or egg hatching [GO:0009792]; engulfment of apoptotic cell [GO:0043652]; growth [GO:0040007]; locomotion [GO:0040011]; nematode larval development [GO:0002119]; positive regulation of multicellular organism growth [GO:0040018]; protein binding [GO:0005515]; regulation of actin filament polymerization [GO:003…	Actin related protein 2/3 complex, subunit [meNOG00998]; Actin-related protein Arp2\/3 complex, subunit ARPC1\/p41-ARC [KOG1523]; FOG: WD40 repeat [COG2319]			SEG: 0.04 (16/368)	1	0.02	0.02	0.04	1	0.04	1	1	1	16.41	42.53	77.8	36.5	39.57	42.53
WBGene00000202	Y6D11A.1	exos-4.2	0	0	0.05	0	0	0	0	0	0	0	0	0.01	0.03	0.02	0.05	0.29	0.57	0.43	1.75	1.75	protein	241 aa	241				RNase_PH [PF01138.20]		Exosomal 3'-5' exoribonuclease complex, subunit Rrp41 and related exoribonucleases [KOG1068]; Exosome component 6 protein [meNOG15697]; RNase PH [COG0689]				0.02	0.04	0.03	0.07	0.07	0.07	0.07	0.07	0.04	1.51	15.37	75.22	15.37	12.07	11.9
WBGene00000203	Y37D8A.1	arx-5	0.01	0	0.03	0.01	0	0	0	0	0	0	0	0.03	0.01	0	0.01	2.89	0.23	0.15	0.35	2.89	protein	183 aa	183				P21-Arc [PF04062.13]	Arp2/3 complex-mediated actin nucleation [GO:0034314]; Arp2/3 protein complex [GO:0005885]; cytoplasm [GO:0005737]; cytoskeleton [GO:0005856]; embryo development ending in birth or egg hatching [GO:0009792]; engulfment of apoptotic cell [GO:0043652]; epithelial cell migration [GO:0010631]; meiotic chromosome segregation [GO:0045132]; morphogenesis of embryonic epithelium [GO:0016331]; negative re…	Actin related protein 2/3 complex, subunit 3 [meNOG03415]; Actin-related protein Arp2\/3 complex, subunit ARPC3 [KOG3155]				0.26	0.06	0.04	0.09	0.26	0.09	0.26	0.26	0.26	10.16	41.7	88.2	41.7	40.25	40.14
WBGene00000204	C35D10.16	arx-6	0	0	0	0	0	0	0	0	0	0	0	0	0	0	0	0.38	0.62	0.38	1.6	1.6	protein	169 aa	169	Housekeeping			ARPC4 [PF05856.11]	Arp2/3 complex-mediated actin nucleation [GO:0034314]; Arp2/3 protein complex [GO:0005885]; actin filament polymerization [GO:0030041]; cytoskeleton [GO:0005856]; embryo development [GO:0009790]; embryo development ending in birth or egg hatching [GO:0009792]; engulfment of apoptotic cell [GO:0043652]; epithelial cell migration [GO:0010631]; morphogenesis of embryonic epithelium [GO:0016331]	Actin related protein 2/3 complex subunit 4 [meNOG05985]; Actin-related protein Arp2\/3 complex, subunit ARPC4 [KOG1876]				0.03	0.05	0.03	0.08	0.08	0.08	0.08	0.08	0.05	40.2	34.63	88.03	31.82	31.67	34.63
WBGene00000205	M01B12.3	arx-7	0.05	0.02	0.03	0.05	0	0	0	0.02	0	0	0	0.03	0	0	0	10.89	0.05	0.04	0.09	10.89	protein	152 aa	152	Housekeeping			P16-Arc [PF04699.13]	Arp2/3 complex-mediated actin nucleation [GO:0034314]; cytoplasm [GO:0005737]; cytoskeleton [GO:0005856]; embryo development [GO:0009790]; embryo development ending in birth or egg hatching [GO:0009792]; engulfment of apoptotic cell [GO:0043652]; epithelial cell migration [GO:0010631]; locomotion [GO:0040011]; morphogenesis of embryonic epithelium [GO:0016331]; nematode larval development [GO:000…	Actin-Related protein 2/3 complex subunit 5 [meNOG17055]; Actin-related protein Arp2\/3 complex, subunit ARPC5 [KOG3380]				0.98	0.05	0.04	0.09	0.98	0.09	0.98	0.98	0.98	29.39	18.73	50.4	17.04	16.14	18.73
WBGene00000206	F35G12.10	asb-1	0.03	0.03	0.09	0	0.03	0	0	0	0.03	0	0	0.01	0.09	0	0	0.06	15.68	0	0.02	15.68	protein	301 aa	301				Mt_ATP-synt_B [PF05405.13]	ATP synthesis coupled proton transport [GO:0015986]; apoptotic process [GO:0006915]; cilium [GO:0005929]; embryo development ending in birth or egg hatching [GO:0009792]; germ cell development [GO:0007281]; hydrogen ion transmembrane transporter activity [GO:0015078]; mitochondrial proton-transporting ATP synthase complex, coupling factor F(o) [GO:0000276]; mitochondrion [GO:0005739]; negative re…	ATP synthase, H+ transporting, mitochondrial F0 complex, subunit [meNOG01309]; Mitochondrial F1F0-ATP synthase, subunit b/ATP4 [KOG3976]				0.6	9.41	0.04	0.15	9.41	9.41	0.6	9.41	9.41	108.51	271.2	371.48	254.63	244.94	271.2
WBGene00000207	F02E8.1	asb-2	0	0	0	0	0	0	0	0	0	0	0	0	0	0	0	1.07	0.53	0.4	0.93	1.07	protein	305 aa	305	Housekeeping			Mt_ATP-synt_B [PF05405.13]	ATP synthesis coupled proton transport [GO:0015986]; determination of adult lifespan [GO:0008340]; embryo development ending in birth or egg hatching [GO:0009792]; hydrogen ion transmembrane transporter activity [GO:0015078]; mitochondrial proton-transporting ATP synthase complex, coupling factor F(o) [GO:0000276]; nematode larval development [GO:0002119]; reproduction [GO:0000003]	ATP synthase, H+ transporting, mitochondrial F0 complex, subunit [meNOG01309]; Mitochondrial F1F0-ATP synthase, subunit b/ATP4 [KOG3976]			SEG: 0.06 (18/305)	0.15	0.08	0.06	0.14	0.15	0.14	0.15	0.15	0.15	89.48	406.12	334.4	335.96	406.12	389.86
WBGene00000208	Y53F4B.15	asc-1	0	0	0.22	0	0	0	0	0	0	0	0	0.06	0.11	0.11	0.22	0.25	0.5	0.5	2	2	protein	425 aa	425				zf-C2HC5 [PF06221.12]	dauer larval development [GO:0040024]; nucleus [GO:0005634]; regulation of transcription, DNA-templated [GO:0006355]; zinc ion binding [GO:0008270]	Activating signal cointegrator 1 [KOG2845]; Thyroid hormone receptor interactor 4 [meNOG00323]		NCoils: 0.05 (21/425)	SEG: 0.08 (34/425)	0.01	0.02	0.02	0.04	0.04	0.04	0.04	0.04	0.02	0.18	19.94	37.28	19.94	18.02	17.62
WBGene00000209	K07A12.3	asg-1	0.02	0.01	0.12	0.02	0	0	0	0.01	0	0	0	0.12	0.03	0.01	0	4.36	0.23	0.05	0.03	4.36	protein	131 aa	131				ATP-synt_G [PF04718.14]	ATP synthesis coupled proton transport [GO:0015986]; body morphogenesis [GO:0010171]; embryo development ending in birth or egg hatching [GO:0009792]; hydrogen ion transmembrane transporter activity [GO:0015078]; mitochondrial proton-transporting ATP synthase complex, coupling factor F(o) [GO:0000276]; reproduction [GO:0000003]	Mitochondrial F1F0-ATP synthase, subunit g/ATP20 [KOG4103]; Mitochondrial membrane ATP synthase (FF ATP synthase or Complex V) produces ATP from ADP in the presence of a proton gradient across the membrane which is generated by electron transport complexes of the respiratory chain. F-type ATPases consist of two structural domains, F - containing the extramembraneous catalytic core, and F - contai…	TM(1x)			6.15	1.41	0.33	0.16	6.15	1.41	6.15	6.15	6.15	51.63	397.15	517.72	397.15	373.84	316.13
WBGene00000210	C53B7.4	asg-2	0.03	0.03	0.39	0.03	0	0.01	0	0.03	0	0.01	0	0.39	0.01	0.08	0.01	4.69	0.02	0.21	0.01	4.69	protein	131 aa	131	Housekeeping			ATP-synt_G [PF04718.14]	ATP synthesis coupled proton transport [GO:0015986]; cilium [GO:0005929]; determination of adult lifespan [GO:0008340]; embryo development ending in birth or egg hatching [GO:0009792]; hydrogen ion transmembrane transporter activity [GO:0015078]; mitochondrial proton-transporting ATP synthase complex, coupling factor F(o) [GO:0000276]; mitochondrion [GO:0005739]; reproduction [GO:0000003]; respon…	Mitochondrial F1F0-ATP synthase, subunit g/ATP20 [KOG4103]; Mitochondrial membrane ATP synthase (FF ATP synthase or Complex V) produces ATP from ADP in the presence of a proton gradient across the membrane which is generated by electron transport complexes of the respiratory chain. F-type ATPases consist of two structural domains, F - containing the extramembraneous catalytic core, and F - contai…	TM(1x)			10.09	0.25	2.15	0.14	10.09	2.15	10.09	10.09	10.09	26.2	337.35	304.34	321.44	337.35	293.52
WBGene00000211	B0252.2	asm-1	0.01	0.01	0.12	0	0.01	0	0.01	0	0.01	0	0.01	0.02	0.11	0.02	0.12	0.14	0.86	0.14	1.17	1.17	protein	564 aa	564				Metallophos [PF00149.27]	extracellular region [GO:0005576]; hydrolase activity [GO:0016787]; lysosome [GO:0005764]; sphingomyelin catabolic process [GO:0006685]; sphingomyelin phosphodiesterase activity [GO:0004767]	Acid sphingomyelinase and PHM5 phosphate metabolism protein [KOG3770]; Sphingomyelin phosphodiesterase [meNOG00979]	SigP			0.01	0.06	0.01	0.07	0.07	0.07	0.07	0.07	0.06	0.56	9.17	6.43	8.21	7.76	9.17
WBGene00000212	ZK455.4	asm-2	0	0	0.02	0	0	0	0	0	0	0	0	0.01	0.01	0.01	0.02	0.5	0.5	0.5	2	2	protein	618 aa	618				Metallophos [PF00149.27]; SapB_1 [PF05184.14]	extracellular region [GO:0005576]; hydrolase activity [GO:0016787]; intracellular [GO:0005622]; lipid metabolic process [GO:0006629]; sphingomyelin catabolic process [GO:0006685]; sphingomyelin phosphodiesterase activity [GO:0004767]	Acid sphingomyelinase and PHM5 phosphate metabolism protein [KOG3770]; Sphingomyelin phosphodiesterase [meNOG00979]	SigP		SEG: 0.06 (34/618)	0.01	0.01	0.01	0.02	0.02	0.02	0.02	0.02	0.01	1.12	13	9.86	12.27	12.95	13
WBGene00000213	W03G1.7	asm-3	0.01	0	0.28	0	0	0	0.01	0	0	0	0	0.11	0.17	0.11	0.28	0.4	0.6	0.4	1.67	1.67	protein	545-589 aa	589				Metallophos [PF00149.27]	determination of adult lifespan [GO:0008340]; hydrolase activity [GO:0016787]; sphingomyelin catabolic process [GO:0006685]; sphingomyelin phosphodiesterase activity [GO:0004767]	Acid sphingomyelinase and PHM5 phosphate metabolism protein [KOG3770]; Sphingomyelin phosphodiesterase [meNOG00979]	SigP		SEG: 0.02 (12/589)	0.02	0.03	0.02	0.05	0.05	0.05	0.05	0.05	0.03	0.18	9	16.45	8.11	6.21	9
WBGene00000214	Y39B6A.20	asp-1	0	0	0	0	0	0	0	0	0	0	0	0	0	0	0	1.13	0.89	0.21	0.43	1.13	protein	396 aa	396	Housekeeping			Asp [PF00026.22]; TAXi_N [PF14543.5]	aspartic-type endopeptidase activity [GO:0004190]; cell [GO:0005623]; cell death [GO:0008219]; endopeptidase activity [GO:0004175]; protein catabolic process [GO:0030163]; proteolysis [GO:0006508]	Aspartyl protease [KOG1339]; Progastricsin (pepsinogen C) protein [meNOG10024]	SigP		SEG: 0.03 (13/396)	8.54	7.57	1.81	3.64	8.54	7.57	8.54	8.54	8.54	2014.12	3867.44	2104.1	3718.36	3867.44	3587.32
WBGene00000215	T18H9.2	asp-2	0.01	0.01	0.01	0.01	0	0	0	0.01	0	0	0	0.01	0	0	0	3.96	0.03	0.25	0.17	3.96	protein	429-635 aa	635	Housekeeping			Asp [PF00026.22]; TAXi_N [PF14543.5]	aspartic-type endopeptidase activity [GO:0004190]; cell death [GO:0008219]; proteolysis [GO:0006508]		SigP; TM(1x)		SEG: 0.05 (31/635)	3.76	0.13	0.95	0.65	3.76	0.95	3.76	3.76	3.76	299.71	562.08	400.45	427.85	562.08	544.34
WBGene00000216	H22K11.1	asp-3	1.07	2.35	0.79	0.04	0.04	0.02	1.07	0.08	0.09	0.04	2.35	0.03	0.03	0.01	0.79	0.03	0.04	0.02	25.92	25.92	protein	398 aa	398	Housekeeping			Asp [PF00026.22]; TAXi_C [PF14541.5]; TAXi_N [PF14543.5]	aspartic-type endopeptidase activity [GO:0004190]; cell death [GO:0008219]; cytoplasm [GO:0005737]; defense response [GO:0006952]; determination of adult lifespan [GO:0008340]; lysosome [GO:0005764]; necrotic cell death [GO:0070265]; proteolysis [GO:0006508]		SigP		SEG: 0.03 (11/398)	42.6	48.71	22.48	1262.71	1262.71	1262.71	1262.71	1262.71	48.71	1607.34	1176.33	537.43	1038.96	1176.33	1163.31
WBGene00000217	R12H7.2	asp-4	0	0	0.03	0	0	0	0	0	0	0	0	0.02	0.02	0.01	0.03	0.67	0.67	0.33	1.5	1.5	protein	444 aa	444				Asp [PF00026.22]; TAXi_C [PF14541.5]; TAXi_N [PF14543.5]	aspartic-type endopeptidase activity [GO:0004190]; cell death [GO:0008219]; cytoplasm [GO:0005737]; lysosome [GO:0005764]; necrotic cell death [GO:0070265]; proteolysis [GO:0006508]	Aspartyl protease [KOG1339]; Cathepsin protein [meNOG02593]	SigP		SEG: 0.04 (16/444)	0.02	0.02	0.01	0.03	0.03	0.03	0.03	0.03	0.02	0.93	263.43	227.44	257.81	263.43	260.84
WBGene00000218	F21F8.3	asp-5	0.08	0.19	0.17	0.06	0.08	0.02	0.03	0.14	0.19	0.05	0.06	0.13	0.17	0.04	0.05	0.75	1.33	0.25	0.32	1.33	protein	393 aa	393	Housekeeping			Asp [PF00026.22]; TAXi_N [PF14543.5]	aspartic-type endopeptidase activity [GO:0004190]; cell death [GO:0008219]; locomotion [GO:0040011]; proteolysis [GO:0006508]	Aspartyl protease [KOG1339]; Cathepsin protein [meNOG02593]	SigP		SEG: 0.06 (24/393)	59.26	78.73	19.57	25.53	78.73	78.73	59.26	78.73	78.73	468.72	952.77	420.64	891.17	952.77	882.97
WBGene00000219	F21F8.7	asp-6	0	0	0.8	0	0	0	0	0	0	0	0	0.8	0.15	0.1	0.2	4	0.19	0.12	0.25	4	protein	389 aa	389				Asp [PF00026.22]; TAXi_N [PF14543.5]	aspartic-type endopeptidase activity [GO:0004190]; cell death [GO:0008219]; proteolysis [GO:0006508]	Aspartyl protease [KOG1339]; Pregnancy-Associated glycoprotein [meNOG00294]	SigP		SEG: 0.06 (25/389)	0.16	0.03	0.02	0.04	0.16	0.04	0.16	0.16	0.16	0.2	2048.02	1067.17	1633.43	2048.02	1922.03
WBGene00000220	K08F8.2	atf-2	0.02	0.02	0.01	0.01	0.01	0.01	0.02	0.01	0.01	0.01	0.02	0	0.01	0	0.01	0.25	0.5	0.25	2	2	protein	401 aa	401		TF[Gupta+Thomas+Walhout]		bZIP_1 [PF00170.20]; bZIP_2 [PF07716.14]	RNA polymerase II regulatory region DNA binding [GO:0001012]; negative regulation of transcription from RNA polymerase II promoter [GO:0000122]; regulation of transcription, DNA-templated [GO:0006355]; sequence-specific DNA binding [GO:0043565]; sequence-specific DNA binding transcription factor activity [GO:0003700]	Basic region leucine zipper transcription factor [KOG3119]; Protein dimerization [meNOG21964]		NCoils: 0.07 (28/401)	SEG: 0.28 (112/401)	0.01	0.02	0.01	0.04	0.04	0.04	0.04	0.04	0.02	3	1.95	1.67	0.86	0.78	1.95
WBGene00000221	T04C10.4	atf-5	0	0	1.1	0	0	0	0	0	0	0	0	0.4	0.7	0.5	1.1	0.36	0.64	0.45	1.57	1.57	protein	208 aa	208		TF[Gupta+Thomas+Walhout]		bZIP_1 [PF00170.20]; bZIP_2 [PF07716.14]	regulation of transcription, DNA-templated [GO:0006355]; sequence-specific DNA binding [GO:0043565]; sequence-specific DNA binding transcription factor activity [GO:0003700]	Activating transcription factor 4 [KOG4571]		NCoils: 0.20 (42/208)	SEG: 0.30 (63/208)	0.04	0.07	0.05	0.11	0.11	0.11	0.11	0.11	0.07	0.1	79.23	65.41	69.85	77.8	79.23
WBGene00000222	F45E6.2	atf-6	0.01	0	0.04	0	0	0	0.01	0	0	0	0	0.02	0.02	0.02	0.04	0.5	0.5	0.5	2	2	protein	589 aa	589		TF[Gupta+Thomas+Walhout]		bZIP_2 [PF07716.14]	RNA polymerase II regulatory region sequence-specific DNA binding [GO:0000977]; determination of adult lifespan [GO:0008340]; positive regulation of transcription from RNA polymerase II promoter involved in unfolded protein response [GO:0006990]; regulation of transcription, DNA-templated [GO:0006355]; response to topologically incorrect protein [GO:0035966]; sequence-specific DNA binding [GO:004…	Activating transcription factor 6 [meNOG09969]; bZIP transcription factor ATF6 [KOG4343]	TM(1x)	NCoils: 0.06 (35/589)	SEG: 0.15 (87/589)	0.01	0.01	0.01	0.02	0.02	0.02	0.02	0.02	0.01	0.53	3.05	5.37	2.36	3.05	2.36
WBGene00000223	C07G2.2	atf-7	0.01	0	0.04	0	0	0.01	0	0	0	0	0	0	0.01	0.04	0.01	0.1	0.18	3.25	0.31	3.25	protein	373-509 aa	509		TF[Gupta+Thomas+Walhout]		bZIP_2 [PF07716.14]	defense response [GO:0006952]; defense response to Gram-negative bacterium [GO:0050829]; mitogen-activated protein kinase binding [GO:0051019]; negative regulation of innate immune response [GO:0045824]; negative regulation of transcription from RNA polymerase II promoter [GO:0000122]; nucleus [GO:0005634]; positive regulation of innate immune response [GO:0045089]; positive regulation of transcr…	Transcriptional activator FOSB/c-Fos and related bZIP transcription factors [KOG1414]	TM(1x)	NCoils: 0.09 (42/457); 0.08 (38/460); 0.07 (38/509); 0.06 (21/373)	SEG: 0.18 (67/373)	0.04	0.07	0.39	0.12	0.39	0.39	0.39	0.12	0.39	10.62	68.05	130.54	50.99	48.29	68.05
WBGene00000224	F26D10.9	atgp-1	0	0.01	0.01	0	0	0	0	0.01	0	0	0.01	0.01	0	0	0	1.56	0.43	0.29	0.64	1.56	protein	177-613 aa	613				Alpha-amylase [PF00128.23]; SLC3A2_N [PF16028.4]	carbohydrate metabolic process [GO:0005975]; catalytic activity [GO:0003824]; cation binding [GO:0043169]; plasma membrane [GO:0005886]	Alpha-amylase [KOG0471]; Glycosidases [COG0366]; Required for the function of light chain amino-acid transporters. Involved in sodium-independent, high-affinity transport of large neutral amino acids such as phenylalanine, tyrosine, leucine, arginine and tryptophan. Involved in guiding and targeting of LAT1 and LAT2 to the plasma membrane. When associated with SLC7A6 or SLC7A7 acts as an arginine…	TM(1x)			0.14	0.06	0.04	0.09	0.14	0.09	0.14	0.14	0.14	20.19	36.41	16.09	30.55	33.85	36.41
WBGene00000225	C38C6.2	atgp-2	0.02	0.02	0.58	0.01	0.01	0.01	0.02	0.01	0.01	0.01	0.02	0.21	0.33	0.25	0.58	0.36	0.57	0.43	1.75	1.75	protein	191-647 aa	647				Alpha-amylase [PF00128.23]; SLC3A2_N [PF16028.4]	amino acid transmembrane transport [GO:0003333]; amino acid transport complex [GO:1990184]; carbohydrate metabolic process [GO:0005975]; catalytic activity [GO:0003824]; cation binding [GO:0043169]; plasma membrane [GO:0005886]	Alpha-amylase [KOG0471]; Glycosidases [COG0366]; Solute carrier family 3 (cystine, dibasic and neutral amino acid transporters, activator of cystine, dibasic and neutral amino acid transport), member 1 protein [meNOG00038]	TM(1x)		SEG: 0.02 (10/647)	0.05	0.08	0.06	0.14	0.14	0.14	0.14	0.14	0.08	0.24	9.29	9.03	8.26	9.29	6.3
WBGene00000226	T06E4.3	atl-1	0	0	0.02	0	0	0	0	0	0	0	0	0.01	0.01	0.01	0.02	0.5	0.5	0.5	2	2	protein	1057-2531 aa	2531				FATC [PF02260.19]; PI3_PI4_kinase [PF00454.26]	1-phosphatidylinositol-3-kinase activity [GO:0016303]; condensed nuclear chromosome [GO:0000794]; embryo development [GO:0009790]; embryo development ending in birth or egg hatching [GO:0009792]; meiotic chromosome segregation [GO:0045132]; meiotic nuclear division [GO:0007126]; nucleus [GO:0005634]; phosphotransferase activity, alcohol group as acceptor [GO:0016773]; protein binding [GO:0005515]…	Phosphatidylinositol kinase and protein kinases of the PI-3 kinase family [COG5032]; Protein kinase of the PI-3 kinase family involved in mitotic growth, DNA repair and meiotic recombination [KOG0890]; Protein serine/threonine kinase [meNOG03115]		NCoils: 0.01 (21/2531); 0.01 (21/2514); 0.02 (21/1057)	SEG: 0.02 (50/2531)	0.01	0.01	0.01	0.02	0.02	0.02	0.02	0.02	0.01	0.9	17.26	30.31	17.26	12.69	16.11
WBGene00000227	Y48G1BL.2	atm-1	0	0	1	0	0	0	0	0	0	0	0	1	1	1	1	1	1	1	1	1	protein	1701-2378 aa	2378				FATC [PF02260.19]; PI3_PI4_kinase [PF00454.26]	chromatin [GO:0000785]; phosphotransferase activity, alcohol group as acceptor [GO:0016773]; protein binding [GO:0005515]; transferase activity, transferring phosphorus-containing groups [GO:0016772]			NCoils: 0.01 (28/2378)	SEG: 0.02 (51/2378)	0	0.01	0.01	0.01	0.01	0.01	0.01	0.01	0.01	0.01	3.58	15.77	3.58	2.6	3.2
WBGene00000228	W04D2.1	atn-1	0	0	0.03	0	0	0	0	0	0	0	0	0.01	0.02	0.01	0.03	0.4	0.6	0.4	1.67	1.67	protein	823-920 aa	920				CAMSAP_CH [PF11971.7]; CH [PF00307.30]; EFhand_Ca_insen [PF08726.9]; Spectrin [PF00435.20]	calcium ion binding [GO:0005509]; embryo development ending in birth or egg hatching [GO:0009792]; mitotic nuclear division [GO:0007067]; protein binding [GO:0005515]; protein catabolic process [GO:0030163]; striated muscle dense body [GO:0055120]; striated muscle thin filament [GO:0005865]	Actinin, alpha protein [meNOG04717]; Ca2+-binding actin-bundling protein (actinin), alpha chain (EF-Hand protein superfamily) [KOG0035]; Ca2+-binding actin-bundling protein fimbrin/plastin (EF-Hand superfamily) [COG5069]		NCoils: 0.09 (84/920); 0.09 (84/894); 0.10 (84/849); 0.10 (84/823)	SEG: 0.02 (20/920)	0.02	0.03	0.02	0.05	0.05	0.05	0.05	0.05	0.03	1.54	126.19	66.18	103.13	125.23	126.19
WBGene00000229	C34E10.6	atp-2	0.02	0.02	0.05	0.01	0.01	0	0.02	0.01	0.01	0	0.02	0.02	0.02	0.01	0.05	0.33	0.35	0.18	2.83	2.83	protein	538 aa	538	Housekeeping			ATP-synt_ab [PF00006.24]; ATP-synt_ab_N [PF02874.22]	ATP binding [GO:0005524]; ATP hydrolysis coupled proton transport [GO:0015991]; ATP metabolic process [GO:0046034]; ATP synthesis coupled proton transport [GO:0015986]; apoptotic process [GO:0006915]; cilium [GO:0005929]; dauer larval development [GO:0040024]; defecation [GO:0030421]; determination of adult lifespan [GO:0008340]; embryo development ending in birth or egg hatching [GO:0009792]; em…	F0F1-type ATP synthase, beta subunit [COG0055]; F0F1-type ATP synthase, beta subunit [KOG1350]; Produces ATP from ADP in the presence of a proton gradient across the membrane protein [meNOG06186]			SEG: 0.11 (58/538)	8.92	9.52	4.96	26.98	26.98	26.98	26.98	26.98	9.52	540.63	1247.07	1525.84	1137.51	1247.07	1226.45
WBGene00000230	F27C1.7	atp-3	0	0	0.01	0	0	0	0	0	0	0	0	0	0	0	0.01	0.17	0.81	0.15	1.24	1.24	protein	207-228 aa	228	Housekeeping			OSCP [PF00213.17]	ATP synthesis coupled proton transport [GO:0015986]; apoptotic process [GO:0006915]; determination of adult lifespan [GO:0008340]; embryo development ending in birth or egg hatching [GO:0009792]; lipid storage [GO:0019915]; mitochondrial ATP synthesis coupled proton transport [GO:0042776]; nematode larval development [GO:0002119]; proton-transporting ATP synthase activity, rotational mechanism [G…	F0F1-type ATP synthase, delta subunit (mitochondrial oligomycin sensitivity protein) [COG0712]; Mitochondrial F1F0-ATP synthase, subunit OSCP/ATP5 [KOG1662]; Mitochondrial membrane ATP synthase (FF ATP synthase or Complex V) produces ATP from ADP in the presence of a proton gradient across the membrane which is generated by electron transport complexes of the respiratory chain. F-type ATPases con…	SigP			0.19	0.88	0.16	1.09	1.09	1.09	1.09	1.09	0.88	183.48	621.16	604.19	564.36	621.16	580.36
WBGene00000231	D2045.1	atx-2	0	0	0.04	0	0	0	0	0	0	0	0	0.02	0.03	0.02	0.04	0.4	0.6	0.4	1.67	1.67	protein	634-1026 aa	1026				SM-ATX [PF14438.5]	cytoplasm [GO:0005737]; embryo development ending in birth or egg hatching [GO:0009792]; feminization of hermaphroditic germ-line [GO:0040022]; germline cell cycle switching, mitotic to meiotic cell cycle [GO:0051729]; meiotic nuclear division [GO:0007126]; oviposition [GO:0018991]; reproduction [GO:0000003]	Protein interacting with poly(A)-binding protein [KOG2375]; Protein involved in stress granule assembly [meNOG03869]			SEG: 0.42 (265/634)	0.02	0.03	0.02	0.05	0.05	0.05	0.05	0.05	0.03	1.16	76.81	114.24	61.68	64.79	76.81
WBGene00000232	B0207.12	avr-14	0.02	0.05	1.07	0.01	0.02	0.01	0.02	0.02	0.03	0.02	0.05	0.4	0.67	0.47	1.07	0.38	0.62	0.44	1.6	1.6	protein	239-430 aa	430				Neur_chan_LBD [PF02931.22]; Neur_chan_memb [PF02932.15]	drug binding [GO:0008144]; extracellular ligand-gated ion channel activity [GO:0005230]; extracellular-glutamate-gated chloride channel activity [GO:0008068]; integral component of membrane [GO:0016021]; ion transport [GO:0006811]; locomotion involved in locomotory behavior [GO:0031987]; membrane [GO:0016020]; regulation of pharyngeal pumping [GO:0043051]; response to drug [GO:0042493]; transport…	Glycine receptor, alpha [meNOG04702]; Ligand-gated ion channel [KOG3644]	SigP; SigP+TM(4x)		SEG: 0.06 (27/416)	0.06	0.1	0.07	0.16	0.16	0.16	0.16	0.16	0.1	0.15	6.66	3.04	4.7	6.66	5.61
WBGene00000233	R11G10.1	avr-15	0	0.02	0.2	0	0	0	0	0.01	0.01	0.01	0.02	0.07	0.12	0.09	0.2	0.38	0.62	0.44	1.6	1.6	protein	179-657 aa	657				Neur_chan_LBD [PF02931.22]; Neur_chan_memb [PF02932.15]	action potential [GO:0001508]; extracellular ligand-gated ion channel activity [GO:0005230]; integral component of membrane [GO:0016021]; ion transport [GO:0006811]; locomotion involved in locomotory behavior [GO:0031987]; membrane [GO:0016020]; regulation of pharyngeal pumping [GO:0043051]; transport [GO:0006810]	Glycine receptor, alpha [meNOG04702]; Ligand-gated ion channel [KOG3644]	SigP+TM(2x); SigP+TM(4x); TM(4x)		SEG: 0.14 (90/657)	0.06	0.1	0.07	0.16	0.16	0.16	0.16	0.16	0.1	0.81	37.23	8.87	23.92	27.54	37.23
WBGene00000235	B0464.7	baf-1	0.22	0.1	0.22	0	0.22	0	0	0	0.1	0	0	0	0.22	0	0	0	89.08	0	0.01	89.08	protein	89 aa	89	Housekeeping			BAF [PF02961.13]	DNA binding [GO:0003677]; body morphogenesis [GO:0010171]; chromosome organization [GO:0051276]; chromosome segregation [GO:0007059]; condensed chromosome [GO:0000793]; condensed chromosome, centromeric region [GO:0000779]; cytoplasm [GO:0005737]; double-stranded DNA binding [GO:0003690]; embryo development ending in birth or egg hatching [GO:0009792]; hermaphrodite genitalia development [GO:0040…					0.05	22.27	0.05	0.25	22.27	22.27	0.25	22.27	22.27	103.26	101.17	231.41	101.17	97.79	93.78
WBGene00000236	F57B10.11	bag-1	0	0	0.03	0	0	0	0	0	0	0	0	0.01	0.02	0.01	0.03	0.33	0.67	0.44	1.5	1.5	protein	210 aa	210				BAG [PF02179.15]; ubiquitin [PF00240.22]	cell growth [GO:0016049]; chaperone binding [GO:0051087]; protein binding [GO:0005515]; protein folding [GO:0006457]	Bcl2-Associated athanogene protein [euNOG01725]; Bcl2-Associated athanogene protein [meNOG04152]; Unnamed protein [TWOG0037]		NCoils: 0.10 (21/210)		0.03	0.06	0.04	0.09	0.09	0.09	0.09	0.09	0.06	3.54	57.09	103.91	57.09	44.7	47.55
WBGene00000237	Y71F9AR.1	bam-2	0	0	0.01	0	0	0	0	0	0	0	0	0.01	0.01	0.01	0.01	1	1	1	1	1	protein	1007 aa	1007					integral component of plasma membrane [GO:0005887]		SigP+TM(1x)		SEG: 0.05 (51/1007)	0	0.01	0.01	0.01	0.01	0.01	0.01	0.01	0.01	1.06	8.61	4.54	7.44	8.61	8.19
WBGene00000238	C54D1.6	bar-1	0	0.01	0.04	0	0	0	0	0	0	0	0.01	0.02	0.02	0.02	0.04	0.5	0.5	0.5	2	2	protein	811 aa	811		TF[Thomas+Walhout]		Arm [PF00514.22]	Ras protein signal transduction [GO:0007265]; Wnt signaling pathway [GO:0016055]; binding [GO:0005488]; cell-cell adherens junction [GO:0005913]; cytoplasm [GO:0005737]; cytosol [GO:0005829]; hermaphrodite genitalia development [GO:0040035]; locomotion [GO:0040011]; mating behavior [GO:0007617]; membrane [GO:0016020]; morphogenesis of an epithelium [GO:0002009]; nucleus [GO:0005634]; oviposition …				SEG: 0.06 (49/811)	0.01	0.01	0.01	0.02	0.02	0.02	0.02	0.02	0.01	0.47	5.29	3.29	4.65	5.29	4.61
WBGene00000239	C05D2.4	bas-1	0.12	0.19	0.54	0.08	0.01	0.12	0.03	0.12	0.02	0.19	0.04	0.35	0.06	0.54	0.12	0.65	0.12	1.53	0.23	1.53	protein	514-523 aa	523				Pyridoxal_deC [PF00282.18]	carboxy-lyase activity [GO:0016831]; carboxylic acid metabolic process [GO:0019752]; catalytic activity [GO:0003824]; cellular amino acid metabolic process [GO:0006520]; dopamine biosynthetic process [GO:0042416]; locomotion involved in locomotory behavior [GO:0031987]; male mating behavior [GO:0060179]; oviposition [GO:0018991]; pyridoxal phosphate binding [GO:0030170]; sensory perception of che…	Aromatic-L-amino-acid/L-histidine decarboxylase [KOG0628]; Decarboxylase [meNOG00691]; Glutamate decarboxylase and related PLP-dependent proteins [COG0076]				1.87	0.34	2.86	0.66	2.86	2.86	2.86	1.87	2.86	5.31	24.32	14.96	20.49	24.32	18.99
WBGene00000240	K08F8.4	pah-1	0	0.01	0.01	0	0	0	0	0.01	0	0	0	0.01	0.01	0	0	2.21	0.45	0.23	0.23	2.21	protein	453-457 aa	457				ACT [PF01842.24]; Biopterin_H [PF00351.20]	L-phenylalanine catabolic process [GO:0006559]; amino acid binding [GO:0016597]; aromatic amino acid family metabolic process [GO:0009072]; collagen and cuticulin-based cuticle development [GO:0040002]; determination of adult lifespan [GO:0008340]; embryo development ending in birth or egg hatching [GO:0009792]; iron ion binding [GO:0005506]; melanin biosynthetic process [GO:0042438]; metabolic p…	Aromatic amino acid hydroxylase [KOG3820]; Hydroxylase [meNOG01821]; Phenylalanine-4-hydroxylase [COG3186]		NCoils: 0.05 (21/457); 0.05 (21/453)		0.31	0.14	0.07	0.07	0.31	0.14	0.31	0.31	0.31	22.69	90.97	51.86	71.56	90.97	69.22
WBGene00000241	Y105E8A.5	bbs-1	0.03	0.12	1	0.01	0.01	0.01	0.03	0.06	0.06	0.06	0.12	0.5	0.5	0.5	1	0.5	0.5	0.5	2	2	protein	576 aa	576				BBS1 [PF14779.5]	axoneme [GO:0005930]	Bardet-Biedl syndrome 1 protein [meNOG03543]; Protein involved in cilium assembly [euNOG01471]; Uncharacterized conserved protein [TWOG0008]			SEG: 0.02 (13/576)	0.01	0.01	0.01	0.02	0.02	0.02	0.02	0.02	0.01	0.02	0.68	0.16	0.62	0.68	0.61
WBGene00000242	F20D12.3	bbs-2	0.03	0.18	1	0.01	0.01	0.01	0.03	0.09	0.09	0.09	0.18	0.5	0.5	0.5	1	0.5	0.5	0.5	2	2	protein	714 aa	714				BBS2_C [PF14782.5]; BBS2_Mid [PF14783.5]; BBS2_N [PF14781.5]	BBSome [GO:0034464]; nonmotile primary cilium assembly [GO:0035058]; protein binding [GO:0005515]			NCoils: 0.03 (21/714)	SEG: 0.04 (32/714)	0.01	0.01	0.01	0.02	0.02	0.02	0.02	0.02	0.01	0.02	0.69	0.11	0.69	0.53	0.49
WBGene00000244	T25F10.5	bbs-8	0.04	0.06	0.07	0.01	0.02	0.01	0.04	0.02	0.04	0.02	0.06	0.02	0.05	0.02	0.07	0.33	0.67	0.33	1.5	1.5	protein	506 aa	506				ANAPC3 [PF12895.6]; BTAD [PF03704.16]; Coatomer_E [PF04733.13]; TPR_1 [PF00515.27]; TPR_10 [PF13374.5]; TPR_11 [PF13414.5]; TPR_12 [PF13424.5]; TPR_14 [PF13428.5]; TPR_16 [PF13432.5]; TPR_17 [PF13431.5]; TPR_19 [PF14559.5]; TPR_2 [PF07719.16]; TPR_6 [PF13174.5]; TPR_7 [PF13176.5]; TPR_8 [PF13181.5]	BBSome [GO:0034464]; chemotaxis [GO:0006935]; cilium assembly [GO:0042384]; intraciliary transport [GO:0042073]; nonmotile primary cilium [GO:0031513]; nonmotile primary cilium assembly [GO:0035058]; olfactory learning [GO:0008355]; protein binding [GO:0005515]; retrograde vesicle-mediated transport, Golgi to ER [GO:0006890]; structural molecule activity [GO:0005198]	FOG: TPR repeat [COG0457]; TPR repeat-containing protein [KOG1129]; Tetratricopeptide repeat domain 8 [meNOG05659]			SEG: 0.04 (20/506)	0.01	0.02	0.01	0.03	0.03	0.03	0.03	0.03	0.02	0.43	0.85	0.51	0.74	0.75	0.85
WBGene00000245	T13C5.5	bca-1	0.06	0.05	0.01	0.06	0	0	0	0.05	0	0	0	0.01	0	0	0	19	0.03	0.02	0.05	19	protein	270 aa	270				Pro_CA [PF00484.18]	carbonate dehydratase activity [GO:0004089]; zinc ion binding [GO:0008270]	Carbonic anhydrase [COG0288]; Carbonic anhydrase [meNOG07022]; Predicted carbonic anhydrase involved in protection against oxidative damage [KOG1578]				0.95	0.03	0.02	0.05	0.95	0.05	0.95	0.95	0.95	79.78	16.94	20.41	13.3	16.94	15.65
WBGene00000246	M7.3	bcc-1	0	0.01	0.05	0	0	0	0	0.01	0.01	0.01	0.01	0.02	0.02	0.02	0.05	0.5	0.5	0.5	2	2	protein	644 aa	644				KH_1 [PF00013.28]; SAM_1 [PF00536.29]; SAM_2 [PF07647.16]	RNA binding [GO:0003723]; embryo development ending in birth or egg hatching [GO:0009792]; protein binding [GO:0005515]	Bicaudal C protein [meNOG03910]; RNA-binding protein Bicaudal-C [KOG4374]; Vigilin [KOG2208]		NCoils: 0.03 (21/644)	SEG: 0.04 (27/644)	0.01	0.01	0.01	0.02	0.02	0.02	0.02	0.02	0.01	0.4	5.18	1.52	3.69	5.18	3.52
WBGene00000247	T19E7.3	bec-1	0.01	0	0.3	0	0	0	0.01	0	0	0	0	0.11	0.18	0.12	0.3	0.35	0.59	0.41	1.7	1.7	protein	118-375 aa	375				APG6 [PF04111.11]	apoptotic cell clearance [GO:0043277]; autophagy [GO:0006914]; cell death [GO:0008219]; cellular response to starvation [GO:0009267]; cytoplasm [GO:0005737]; cytoplasmic vesicle [GO:0031410]; dauer larval development [GO:0040024]; defense response [GO:0006952]; determination of adult lifespan [GO:0008340]; embryo development ending in birth or egg hatching [GO:0009792]; growth [GO:0040007]; herma…	Beclin-like protein [KOG2751]; Protein involved in positive regulation of macroautophagy [meNOG11902]		NCoils: 0.11 (42/375)	SEG: 0.15 (57/375)	0.06	0.1	0.07	0.17	0.17	0.17	0.17	0.17	0.1	0.56	28.83	36.87	23.44	20.8	28.83
WBGene00000248	C54C6.2	ben-1	0	0	0.05	0	0	0	0	0	0	0	0	0.05	0.01	0.01	0.03	2	0.25	0.12	0.5	2	protein	444 aa	444				Tubulin [PF00091.24]; Tubulin_C [PF03953.16]	GTP binding [GO:0005525]; GTP catabolic process [GO:0006184]; GTPase activity [GO:0003924]; chemosensory behavior [GO:0007635]; embryo development ending in birth or egg hatching [GO:0009792]; hermaphrodite genitalia development [GO:0040035]; microtubule [GO:0005874]; microtubule-based process [GO:0007017]; nematode larval development [GO:0002119]; positive regulation of multicellular organism gr…	Beta tubulin [KOG1375]; Tubulin [COG5023]; Tubulin is the major constituent of microtubules. It binds two moles of GTP, one at an exchangeable site on the beta chain and one at a non-exchangeable site on the alpha-chain protein [meNOG03434]		NCoils: 0.05 (21/444)	SEG: 0.12 (55/444)	0.08	0.02	0.01	0.04	0.08	0.04	0.08	0.08	0.08	1.59	123.01	29.73	113.54	104.25	123.01
WBGene00000249	T27F2.3	bir-1	0.01	0	0.05	0	0	0	0.01	0	0	0	0	0.03	0.02	0.01	0.05	0.66	0.38	0.28	1.53	1.53	protein	155 aa	155				BIR [PF00653.20]; zf-C3HC [PF07967.12]	body morphogenesis [GO:0010171]; condensed chromosome [GO:0000793]; embryo development ending in birth or egg hatching [GO:0009792]; hermaphrodite genitalia development [GO:0040035]; histone acetylation [GO:0016573]; inductive cell migration [GO:0040039]; locomotion [GO:0040011]; meiotic nuclear division [GO:0007126]; mitotic spindle organization [GO:0007052]; nematode larval development [GO:0002…	Apoptosis inhibitor IAP1 and related BIR domain proteins [KOG1101]; Baculoviral IAP repeat-containing protein [meNOG18673]				0.19	0.11	0.08	0.29	0.29	0.29	0.29	0.29	0.19	5.7	44.46	90.99	44.46	37.67	41.64
WBGene00000250	C50B8.2	bir-2	0	0	0	0	0	0	0	0	0	0	0	0	0	0	0	0.4	0.6	0.4	1.67	1.67	protein	308 aa	308				BIR [PF00653.20]	determination of adult lifespan [GO:0008340]; embryo development ending in birth or egg hatching [GO:0009792]; gamete generation [GO:0007276]	Apoptosis inhibitor IAP1 and related BIR domain proteins [KOG1101]; Protein involved in negative regulation of apoptosis [meNOG17666]			SEG: 0.06 (18/308)	0.02	0.03	0.02	0.05	0.05	0.05	0.05	0.05	0.03	24.43	14.58	57.53	14.39	10.67	14.58
WBGene00000251	C09G5.6	bli-1	0.01	0.01	0	0.01	0.01	0.01	0.01	0.01	0.01	0.01	0.01	0	0	0	0	1	1	1	1	1	protein	948 aa	948				Col_cuticle_N [PF01484.16]; Collagen [PF01391.17]; SspO [PF08175.11]	collagen and cuticulin-based cuticle development [GO:0040002]; embryo development ending in birth or egg hatching [GO:0009792]; locomotion [GO:0040011]; molting cycle, collagen and cuticulin-based cuticle [GO:0018996]; nematode larval development [GO:0002119]; proteinaceous extracellular matrix [GO:0005578]; reproduction [GO:0000003]; structural constituent of collagen and cuticulin-based cuticle…	Collagens (type IV and type XIII), and related proteins [KOG3544]	SigP		SEG: 0.22 (205/948)	0	0.01	0.01	0.01	0.01	0.01	0.01	0.01	0.01	24.08	1.54	0.94	1.54	0.29	1.32
WBGene00000252	F59E12.12	bli-2	0.61	2.46	0.04	0.61	0.01	0.01	0.02	2.46	0.04	0.02	0.06	0.04	0	0	0	39.83	0.02	0.01	0.03	39.83	protein	311 aa	311				Col_cuticle_N [PF01484.16]; Collagen [PF01391.17]	collagen and cuticulin-based cuticle development [GO:0040002]; external encapsulating structure [GO:0030312]; locomotion [GO:0040011]; structural constituent of collagen and cuticulin-based cuticle [GO:0042329]; structural constituent of cuticle [GO:0042302]	Collagens (type IV and type XIII), and related proteins [KOG3544]	TM(1x)		SEG: 0.43 (134/311)	2.39	0.04	0.02	0.06	2.39	0.06	2.39	2.39	2.39	64.06	3.93	0.97	3.93	0.26	2.59
WBGene00000253	F56C11.1	bli-3	0	0	0.01	0	0	0	0	0	0	0	0	0.01	0.01	0.01	0.01	1	1	1	1	1	protein	1497 aa	1497				An_peroxidase [PF03098.14]; FAD_binding_8 [PF08022.11]; Ferric_reduct [PF01794.18]; NAD_binding_6 [PF08030.11]	body morphogenesis [GO:0010171]; calcium ion binding [GO:0005509]; collagen and cuticulin-based cuticle development [GO:0040002]; cuticle development involved in collagen and cuticulin-based cuticle molting cycle [GO:0042338]; defense response [GO:0006952]; embryo development ending in birth or egg hatching [GO:0009792]; heme binding [GO:0020037]; locomotion [GO:0040011]; molting cycle, collagen …	Dual oxidase [meNOG06446]; Ferric reductase, NADH/NADPH oxidase and related proteins [KOG0039]	SigP+TM(7x)		SEG: 0.03 (42/1497)	0	0.01	0	0.01	0.01	0.01	0.01	0.01	0.01	0.8	8.4	5.33	7.21	8.4	8.08
WBGene00000254	K04F10.4	bli-4	0	0	0.01	0	0	0	0	0	0	0	0	0.01	0.01	0	0.01	1.16	0.5	0.36	0.86	1.16	protein	666-942 aa	942				P_proprotein [PF01483.19]; Peptidase_S8 [PF00082.21]; S8_pro-domain [PF16470.4]	body morphogenesis [GO:0010171]; collagen and cuticulin-based cuticle development [GO:0040002]; embryo development ending in birth or egg hatching [GO:0009792]; locomotion [GO:0040011]; molting cycle, collagen and cuticulin-based cuticle [GO:0018996]; nematode larval development [GO:0002119]; nucleus [GO:0005634]; proteolysis [GO:0006508]; serine-type endopeptidase activity [GO:0004252]	Proprotein convertase subtilisin/kexin type [meNOG00272]; Regulatory P domain of the subtilisin-like proprotein convertases and other proteases [COG4935]; Subtilisin-like proprotein convertase [KOG3525]; Subtilisin-like serine proteases [COG1404]	SigP; SigP+TM(1x)		SEG: 0.07 (64/942)	0.22	0.11	0.08	0.19	0.22	0.19	0.22	0.22	0.22	17.11	73.2	91.72	61.66	58.13	73.2
WBGene00000255	F45G2.5	bli-5	0.07	0.1	0.11	0.03	0.04	0.03	0.07	0.04	0.06	0.04	0.1	0.04	0.07	0.05	0.11	0.36	0.64	0.45	1.57	1.57	protein	202 aa	202				Kunitz_BPTI [PF00014.22]	collagen and cuticulin-based cuticle development [GO:0040002]; cuticle development involved in collagen and cuticulin-based cuticle molting cycle [GO:0042338]; locomotion [GO:0040011]; molting cycle, collagen and cuticulin-based cuticle [GO:0018996]; multicellular organismal protein catabolic process [GO:0044254]; nematode larval development [GO:0002119]; serine-type endopeptidase activity [GO:00…	Serine proteinase inhibitor (KU family) [KOG4295]	SigP			0.04	0.07	0.05	0.11	0.11	0.11	0.11	0.11	0.07	0.98	1.56	1.13	1.56	1.07	1
WBGene00000256	Y73B6BL.34	bli-6	3.36	6.57	0.11	3.36	0.37	0.38	0.08	6.57	0.73	0.75	0.16	0.11	0.01	0.01	0	8.78	0.11	0.11	0.02	8.78	protein	297 aa	297				Col_cuticle_N [PF01484.16]; Collagen [PF01391.17]	collagen and cuticulin-based cuticle development [GO:0040002]; structural constituent of cuticle [GO:0042302]	Collagens (type IV and type XIII), and related proteins [KOG3544]	TM(1x)		SEG: 0.58 (171/297)	284.15	31.65	32.37	6.82	284.15	32.37	284.15	284.15	284.15	2515.08	84.54	43.22	52.8	84.54	36.92
WBGene00000257	F23B12.8	bmk-1	0	0	0.02	0	0	0	0	0	0	0	0	0.02	0.01	0.01	0.01	1.25	0.6	0.4	0.8	1.25	protein	958-963 aa	963				Kinesin [PF00225.22]; Microtub_bd [PF16796.4]	ATP binding [GO:0005524]; apoptotic process [GO:0006915]; kinesin complex [GO:0005871]; microtubule binding [GO:0008017]; microtubule motor activity [GO:0003777]; microtubule-based movement [GO:0007018]; mitotic spindle organization [GO:0007052]; negative regulation of mitotic spindle elongation [GO:1902845]; plus-end-directed microtubule motor activity [GO:0008574]; protein binding [GO:0005515];…			NCoils: 0.08 (81/958); 0.08 (81/963)	SEG: 0.06 (56/963)	0.05	0.03	0.02	0.04	0.05	0.04	0.05	0.05	0.05	3.24	43.29	42.29	41.99	32.57	43.29
WBGene00000259	F13H8.10	bpl-1	0.02	0.02	0.06	0	0.02	0	0.01	0	0.02	0	0	0.01	0.06	0.01	0.01	0.11	4.62	0.11	0.22	4.62	protein	558-1215 aa	1215				BPL_LplA_LipB [PF03099.18]	biotin-[acetyl-CoA-carboxylase] ligase activity [GO:0004077]; cellular protein modification process [GO:0006464]	Biotin holocarboxylase synthetase/biotin-protein ligase [KOG1536]; Biotin-(acetyl-CoA carboxylase) ligase [COG0340]; Holocarboxylase synthetase (biotin-(proprionyl-Coenzyme A-carboxylase (ATP-hydrolysing)) ligase) [meNOG01388]	SigP		SEG: 0.09 (108/1215)	0.04	0.37	0.04	0.08	0.37	0.37	0.08	0.37	0.37	6.42	15.82	21.57	15.82	12.8	13.56
WBGene00000262	F54B11.6	bra-1	0.02	0.01	0.03	0	0.01	0.01	0.02	0	0	0	0.01	0.01	0.02	0.01	0.03	0.29	0.57	0.43	1.75	1.75	protein	183 aa	183				zf-MYND [PF01753.17]	axon [GO:0030424]; dendrite [GO:0030425]; negative regulation of transforming growth factor beta receptor signaling pathway [GO:0030512]; receptor binding [GO:0005102]	PHD Zn-finger protein [KOG3612]		NCoils: 0.24 (44/183)		0.02	0.04	0.03	0.07	0.07	0.07	0.07	0.07	0.04	2.33	4.6	9.29	4.6	3.48	4.03
WBGene00000263	F23H11.5		0.38	0.42	1.85	0.38	0.13	0.34	0.02	0.42	0.15	0.38	0.02	1.85	0.66	1.67	0.11	1.11	0.36	0.9	0.06	1.11	protein	96 aa	96	Housekeeping			Deltameth_res [PF16020.4]	body morphogenesis [GO:0010171]; embryo development ending in birth or egg hatching [GO:0009792]; lipid storage [GO:0019915]; nematode larval development [GO:0002119]; reproduction [GO:0000003]		TM(1x)		SEG: 0.12 (12/96)	269.77	96.45	243.71	15.84	269.77	243.71	269.77	269.77	269.77	146.2	718.89	649	649.32	718.89	652.65
WBGene00000264	C36A4.8	brc-1	0.02	0.01	0.15	0.01	0.01	0.01	0.02	0	0	0	0.01	0.05	0.08	0.06	0.15	0.33	0.56	0.39	1.8	1.8	protein	117-612 aa	612		TF[Gupta]		BRCT [PF00533.25]; BRCT_2 [PF16589.4]; zf-C3HC4 [PF00097.24]; zf-RING_5 [PF14634.5]; zf-RING_UBOX [PF13445.5]	BRCA1-BARD1 complex [GO:0031436]; DNA binding [GO:0003677]; DNA repair [GO:0006281]; apoptotic process [GO:0006915]; cell death [GO:0008219]; cellular response to DNA damage stimulus [GO:0006974]; cellular response to stress [GO:0033554]; double-strand break repair via homologous recombination [GO:0000724]; meiotic chromosome segregation [GO:0045132]; meiotic chromosome separation [GO:0051307]; n…	The BRCA1-BARD1 heterodimer coordinates a diverse range of cellular pathways such as DNA damage repair, ubiquitination and transcriptional regulation to maintain genomic stability. Acts by mediating ubiquitin E3 ligase activity that is required for its tumor suppressor function. Plays a central role in DNA repair by facilitating cellular response to DNA repair. Required for appropriate cell cycle…		NCoils: 0.03 (21/612)	SEG: 0.08 (47/612)	0.06	0.1	0.07	0.18	0.18	0.18	0.18	0.18	0.1	1.18	10.06	30.32	8.88	7.45	10.06
WBGene00000265	K04C2.4	brd-1	0.01	0	0.02	0	0	0.01	0.01	0	0	0	0	0.01	0.01	0.02	0.02	0.25	0.5	1.33	0.75	1.33	protein	702 aa	702				Ank [PF00023.29]; Ank_2 [PF12796.6]; Ank_3 [PF13606.5]; Ank_4 [PF13637.5]; Ank_5 [PF13857.5]; BRCT [PF00533.25]	BRCA1-BARD1 complex [GO:0031436]; DNA repair [GO:0006281]; cell death [GO:0008219]; cellular response to DNA damage stimulus [GO:0006974]; cellular response to stress [GO:0033554]; meiotic chromosome segregation [GO:0045132]; protein binding [GO:0005515]; protein ubiquitination [GO:0016567]	BRCA1 associated RING domain protein [meNOG13328]			SEG: 0.01 (7/702)	0.02	0.04	0.08	0.06	0.08	0.08	0.08	0.06	0.08	3.38	9.04	28.59	9.04	7.6	8.87
WBGene00000266	C53B4.7	bre-1	0.85	4.51	0.78	0.85	0.05	0.06	0.1	4.51	0.26	0.34	0.51	0.78	0.04	0.06	0.09	8.93	0.06	0.07	0.11	8.93	protein	368-399 aa	399	Housekeeping			Epimerase [PF01370.20]; GDP_Man_Dehyd [PF16363.4]; Polysacc_synt_2 [PF02719.14]; RmlD_sub_bind [PF04321.16]	GDP-L-fucose biosynthetic process [GO:0042350]; GDP-mannose 4,6-dehydratase activity [GO:0008446]; GDP-mannose metabolic process [GO:0019673]; catalytic activity [GO:0003824]; coenzyme binding [GO:0050662]; endoplasmic reticulum [GO:0005783]; endoplasmic reticulum unfolded protein response [GO:0030968]; sarcomere [GO:0030017]; striated muscle dense body [GO:0055120]; striated muscle myosin thick …	GDP-D-mannose dehydratase [COG1089]; GDP-mannose 4,6 dehydratase [KOG1372]; Gdp-Mannose 4,6-dehydratase [meNOG06487]			SEG: 0.06 (21/368)	78.78	4.5	5.86	8.82	78.78	8.82	78.78	78.78	78.78	100.96	92.33	17.45	79.68	87.5	92.33
WBGene00000267	Y39E4B.9	bre-2	0.04	0.07	0.44	0.01	0.02	0.02	0.04	0.02	0.04	0.03	0.07	0.15	0.27	0.2	0.44	0.33	0.61	0.44	1.64	1.64	protein	308-400 aa	400				Galactosyl_T [PF01762.20]	galactosyltransferase activity [GO:0008378]; membrane [GO:0016020]; protein glycosylation [GO:0006486]	Beta-1,3-Galactosyltransferase [meNOG13345]; Galactosyltransferases [KOG2287]	TM(1x)			0.06	0.11	0.08	0.18	0.18	0.18	0.18	0.18	0.11	0.41	4.56	2.59	4.56	3.77	4.44
WBGene00000268	B0464.4	bre-3	0	0	0.01	0	0	0	0	0	0	0	0	0	0.01	0	0.01	0.25	0.75	0.5	1.33	1.33	protein	455 aa	455				Glyco_tranf_2_3 [PF13641.5]; Glyco_trans_2_3 [PF13632.5]	beta-1,4-mannosyltransferase activity [GO:0019187]	Beta-1,4-Mannosyltransferase [euNOG05581]; Beta-1,4-Mannosyltransferase [meNOG00634]; Unnamed protein [TWOG0798]	TM(5x)		SEG: 0.07 (32/455)	0.01	0.03	0.02	0.04	0.04	0.04	0.04	0.04	0.03	5.23	57.65	42.46	49.09	48.82	57.65
WBGene00000269	Y73E7A.7	bre-4	0	0.01	0.01	0	0	0	0	0.01	0	0	0.01	0.01	0.01	0.01	0.01	0.91	0.64	0.45	1.1	1.1	protein	218-383 aa	383				Glyco_transf_7C [PF02709.13]; Glyco_transf_7N [PF13733.5]	beta-1,4-N-acetylgalactosaminyltransferase activity [GO:0033207]; carbohydrate metabolic process [GO:0005975]; positive regulation of Notch signaling pathway [GO:0045747]; protein glycosylation [GO:0006486]; response to toxic substance [GO:0009636]; transferase activity, transferring glycosyl groups [GO:0016757]	Beta-1,4-Galactosyltransferase [meNOG01170]; UDP-Gal:glucosylceramide beta-1,4-galactosyltransferase [KOG3916]	SigP		SEG: 0.04 (14/383)	0.1	0.07	0.05	0.11	0.11	0.11	0.11	0.11	0.1	8.41	24.11	17.92	24.11	19.21	18.72
WBGene00000270	T12G3.8	bre-5	0.01	0	0.04	0	0	0	0.01	0	0	0	0	0.03	0.02	0.01	0.04	0.83	0.5	0.33	1.2	1.2	protein	231-322 aa	322				Galactosyl_T [PF01762.20]	carbohydrate biosynthetic process [GO:0016051]; galactosyltransferase activity [GO:0008378]; membrane [GO:0016020]; positive regulation of Notch signaling pathway [GO:0045747]; protein glycosylation [GO:0006486]; response to toxic substance [GO:0009636]	Beta-1,3-Galactosyltransferase [meNOG15868]; Galactosyltransferases [KOG2287]	TM(1x)		SEG: 0.05 (17/322)	0.05	0.03	0.02	0.06	0.06	0.06	0.06	0.06	0.05	1.62	10.68	22.02	10.68	8.72	9.5
WBGene00000271	F45E12.2	brf-1	0	0	0.01	0	0	0	0	0	0	0	0	0	0	0	0.01	0.5	0.5	0.5	2	2	protein	759 aa	759				BRF1 [PF07741.12]; Cyclin_N [PF00134.22]; TFIIB [PF00382.18]; TF_Zn_Ribbon [PF08271.11]	DNA-templated transcription, initiation [GO:0006352]; TBP-class protein binding [GO:0017025]; nematode larval development [GO:0002119]; receptor-mediated endocytosis [GO:0006898]; regulation of transcription, DNA-templated [GO:0006355]; reproduction [GO:0000003]; zinc ion binding [GO:0008270]	BRF1 homolog, subunit of RNA polymerase III transcription initiation factor IIIB [meNOG01279]; Transcription initiation factor TFIIIB, Brf1 subunit [KOG1598]; Transcription initiation factor TFIIIB, Brf1 subunit/Transcription initiation factor TFIIB [COG1405]		NCoils: 0.05 (35/759)	SEG: 0.08 (58/759)	0.01	0.01	0.01	0.02	0.02	0.02	0.02	0.02	0.01	2.68	7.66	38.35	7.14	6.53	7.66
WBGene00000272	F56A3.5	bro-1	0.09	0.65	1.15	0.03	0.05	0.04	0.09	0.22	0.39	0.26	0.65	0.38	0.69	0.46	1.15	0.33	0.6	0.4	1.67	1.67	protein	152 aa	152				CBF_beta [PF02312.16]	nucleus [GO:0005634]; tail tip morphogenesis [GO:0045138]; transcription coactivator activity [GO:0003713]	Transcription factor CBF, beta subunit [KOG4785]			SEG: 0.24 (36/152)	0.05	0.09	0.06	0.15	0.15	0.15	0.15	0.15	0.09	0.13	1.65	0.23	1.65	1.48	1.21
WBGene00000273	Y79H2A.1	brp-1	0	0	0.01	0	0	0	0	0	0	0	0	0.01	0	0	0	2.13	0.28	0.19	0.47	2.13	protein	412-552 aa	552						Unnamed protein [LSE4056]	TM(1x)	NCoils: 0.04 (21/552); 0.05 (21/466); 0.04 (21/515); 0.05 (21/412); 0.04 (21/534)	SEG: 0.41 (193/466)	0.32	0.09	0.06	0.15	0.32	0.15	0.32	0.32	0.32	34.25	364.18	189.71	338.92	347.76	364.18
WBGene00000274	F15D4.1	btf-1	0	0	0.1	0	0	0	0	0	0	0	0	0.1	0.1	0.1	0.1	1	1	1	1	1	protein	1649 aa	1649				DUF3535 [PF12054.7]; HEAT [PF02985.21]; Helicase_C [PF00271.30]; SNF2_N [PF00176.22]	ATP binding [GO:0005524]; DNA binding [GO:0003677]; binding [GO:0005488]	BTAF1 RNA polymerase II, B-TFIID transcription factor-associated, 170kDa (Mot1 homolog, S. cerevisiae) [meNOG08086]; SNF2 family DNA-dependent ATPase domain-containing protein [KOG0392]; Superfamily II DNA/RNA helicases, SNF2 family [COG0553]			SEG: 0.01 (19/1649)	0	0	0	0.01	0.01	0.01	0.01	0.01	0	0.1	4.66	18.86	4.66	4.37	4.5
WBGene00000275	R06C7.8	bub-1	0.04	0.03	0.06	0.02	0.04	0.01	0	0.01	0.03	0.01	0	0.03	0.06	0.01	0	0.54	1.86	0.23	0.02	1.86	protein	987 aa	987				Pkinase [PF00069.24]; Pkinase_Tyr [PF07714.16]	ATP binding [GO:0005524]; apoptotic process [GO:0006915]; embryo development ending in birth or egg hatching [GO:0009792]; hermaphrodite genitalia development [GO:0040035]; kinetochore [GO:0000776]; locomotion [GO:0040011]; nematode larval development [GO:0002119]; protein kinase activity [GO:0004672]; protein phosphorylation [GO:0006468]; reproduction [GO:0000003]; transferase activity, transfer…	Budding uninhibited by benzimidazoles 1 homolog protein [meNOG00735]; Mitotic checkpoint serine/threonine protein kinase [KOG1166]; Unnamed protein [LSE0746]			SEG: 0.05 (50/987)	1.21	2.25	0.52	0.04	2.25	2.25	1.21	2.25	2.25	35.22	57	84.12	55.75	47.09	57
WBGene00000276	F57B9.5	byn-1	0	0	0	0	0	0	0	0	0	0	0	0	0	0	0	0.33	2	0.17	0.5	2	protein	449 aa	449				Bystin [PF05291.10]	embryo development ending in birth or egg hatching [GO:0009792]; gamete generation [GO:0007276]; hermaphrodite genitalia development [GO:0040035]; nematode larval development [GO:0002119]; receptor-mediated endocytosis [GO:0006898]; reproduction [GO:0000003]	Cell adhesion complex protein bystin [KOG3871]; Protein involved in ribosome biogenesis [meNOG04087]		NCoils: 0.05 (21/449)	SEG: 0.06 (25/449)	0.02	0.06	0.01	0.03	0.06	0.06	0.03	0.06	0.06	41.08	30.18	74.99	30.18	28.19	29.83
WBGene00000277	C23H4.1	cab-1	0.03	0.08	0.4	0.01	0.03	0	0.01	0.02	0.08	0	0.02	0.1	0.4	0.02	0.09	0.25	3.94	0.05	0.24	3.94	protein	425 aa	425	Housekeeping			NPDC1 [PF06809.10]	cell [GO:0005623]; embryo development ending in birth or egg hatching [GO:0009792]; integral component of membrane [GO:0016021]; nematode larval development [GO:0002119]; synaptic transmission [GO:0007268]	Neural proliferation, differentiation and control protein [KOG3884]; Neural proliferation, differentiation and control protein [meNOG07772]	SigP+TM(1x)	NCoils: 0.10 (42/425)	SEG: 0.07 (30/425)	0.89	3.51	0.18	0.83	3.51	3.51	0.89	3.51	3.51	8.79	104.79	41.48	97.07	104.79	103.12
WBGene00000279	F54D8.4	cah-1	0.02	0.02	0.03	0.01	0.01	0.01	0.02	0.01	0.01	0.01	0.02	0.02	0.02	0.01	0.03	0.6	0.6	0.4	1.67	1.67	protein	365 aa	365				Carb_anhydrase [PF00194.20]		Carbonic anhydrase [COG3338]; Carbonic anhydrase [KOG0382]; Carbonic anhydrase [meNOG07873]	SigP+TM(2x)			0.03	0.03	0.02	0.05	0.05	0.05	0.05	0.05	0.03	1.98	2.58	2.28	2	2.36	2.58
WBGene00000280	D1022.8	cah-2	0.18	0.52	0.28	0.18	0.01	0.01	0.02	0.52	0.04	0.03	0.06	0.28	0.02	0.02	0.03	9	0.08	0.06	0.11	9	protein	337 aa	337				Carb_anhydrase [PF00194.20]		Carbonic anhydrase [COG3338]; Carbonic anhydrase [KOG0382]; Carbonic anhydrase [meNOG07873]				0.36	0.03	0.02	0.04	0.36	0.04	0.36	0.36	0.36	1.3	2.05	0.69	1.78	2.05	1.7
WBGene00000281	K05G3.3	cah-3	0	0	0.01	0	0	0	0	0	0	0	0	0	0.01	0	0.01	0.4	0.6	0.4	1.67	1.67	protein	246 aa	246				Carb_anhydrase [PF00194.20]		Carbonic anhydrase [COG3338]; Carbonic anhydrase [KOG0382]; Carbonic anhydrase [meNOG05184]				0.02	0.03	0.02	0.05	0.05	0.05	0.05	0.05	0.03	4.26	60.3	37.89	57.06	60.3	55.89
WBGene00000282	R01E6.3	cah-4	0.01	0.02	0.02	0.01	0	0	0	0.02	0	0	0	0.02	0	0	0	20.64	0.03	0.02	0.05	20.64	protein	235-280 aa	280	Housekeeping			Carb_anhydrase [PF00194.20]	body morphogenesis [GO:0010171]; carbonate dehydratase activity [GO:0004089]; locomotion [GO:0040011]; small molecule metabolic process [GO:0044281]	Carbonic anhydrase [COG3338]; Carbonic anhydrase [KOG0382]; Carbonic anhydrase [meNOG05184]			SEG: 0.07 (20/280)	2.27	0.06	0.04	0.11	2.27	0.11	2.27	2.27	2.27	93.1	181.99	148.33	108.42	116.1	181.99
WBGene00000283	R173.1	cah-5	0	0	0	0	0	0	0	0	0	0	0	0	0	0	0	1.6	0.38	0.25	0.62	1.6	protein	310 aa	310				Carb_anhydrase [PF00194.20]		Carbonic anhydrase [COG3338]; Carbonic anhydrase [KOG0382]; Carbonic anhydrase [meNOG05184]	SigP+TM(1x)		SEG: 0.08 (25/310)	0.08	0.03	0.02	0.05	0.08	0.05	0.08	0.08	0.08	19.8	33.35	29.25	24.52	33.35	31.67
WBGene00000284	T28F2.3	cah-6	0.01	0.03	1.2	0	0	0	0.01	0.01	0.02	0.01	0.03	0.4	0.8	0.4	1.2	0.33	0.67	0.33	1.5	1.5	protein	319 aa	319				Carb_anhydrase [PF00194.20]		Carbonic anhydrase [COG3338]; Carbonic anhydrase [KOG0382]; Carbonic anhydrase [meNOG05184]				0.02	0.04	0.02	0.06	0.06	0.06	0.06	0.06	0.04	0.05	8.36	1.75	5.6	8.36	6.75
WBGene00000285	C13C12.1	cal-1	0.01	0.02	0.08	0	0.01	0	0.01	0.01	0.01	0.01	0.02	0.03	0.05	0.03	0.08	0.38	0.62	0.44	1.6	1.6	protein	161-180 aa	180				EF-hand_1 [PF00036.31]; EF-hand_11 [PF08976.10]; EF-hand_4 [PF12763.6]; EF-hand_5 [PF13202.5]; EF-hand_6 [PF13405.5]; EF-hand_7 [PF13499.5]; EF-hand_8 [PF13833.5]; EF-hand_9 [PF14658.5]; SPARC_Ca_bdg [PF10591.8]	calcium ion binding [GO:0005509]; embryo development ending in birth or egg hatching [GO:0009792]	Ca2+-binding protein (EF-Hand superfamily) [COG5126]; Calmodulin and related proteins (EF-Hand superfamily) [KOG0027]; Calmodulin protein [meNOG10158]				0.06	0.1	0.07	0.16	0.16	0.16	0.16	0.16	0.1	2.11	16.2	7.52	12.63	16.2	13.86
WBGene00000286	C18E9.1	cal-2	0.01	0.01	0.01	0	0	0	0.01	0	0.01	0	0.01	0.01	0.01	0.01	0.01	0.38	0.62	0.38	1.6	1.6	protein	171 aa	171				EF-hand_1 [PF00036.31]; EF-hand_11 [PF08976.10]; EF-hand_4 [PF12763.6]; EF-hand_5 [PF13202.5]; EF-hand_6 [PF13405.5]; EF-hand_7 [PF13499.5]; EF-hand_8 [PF13833.5]; EF-hand_9 [PF14658.5]	calcium ion binding [GO:0005509]; embryo development ending in birth or egg hatching [GO:0009792]	Ca2+-binding protein (EF-Hand superfamily) [COG5126]; Calmodulin and related proteins (EF-Hand superfamily) [KOG0027]; Calmodulin protein [meNOG10158]			SEG: 0.13 (23/171)	0.03	0.05	0.03	0.08	0.08	0.08	0.08	0.08	0.05	5.86	11.23	8.74	10.31	10	11.23
WBGene00000287	M02B7.6	cal-3	0.04	0.06	1.13	0.01	0.02	0.01	0.04	0.02	0.04	0.03	0.06	0.4	0.67	0.47	1.13	0.35	0.59	0.41	1.7	1.7	protein	164-234 aa	234				EF-hand_1 [PF00036.31]; EF-hand_4 [PF12763.6]; EF-hand_5 [PF13202.5]; EF-hand_6 [PF13405.5]; EF-hand_7 [PF13499.5]; EF-hand_8 [PF13833.5]; EF-hand_9 [PF14658.5]	calcium ion binding [GO:0005509]	Ca2+-binding protein (EF-Hand superfamily) [COG5126]; Calmodulin and related proteins (EF-Hand superfamily) [KOG0027]; Calmodulin protein [meNOG10158]			SEG: 0.07 (11/164)	0.06	0.1	0.07	0.17	0.17	0.17	0.17	0.17	0.1	0.15	4.82	2.67	4.63	3.69	4.82
WBGene00000288	T07G12.1	cal-4	0.36	1.51	1.34	0.01	0.01	0.01	0.36	0.02	0.04	0.03	1.51	0.02	0.03	0.02	1.34	0.01	0.02	0.02	40.2	40.2	protein	182-236 aa	236				EF-hand_1 [PF00036.31]; EF-hand_4 [PF12763.6]; EF-hand_5 [PF13202.5]; EF-hand_6 [PF13405.5]; EF-hand_7 [PF13499.5]; EF-hand_8 [PF13833.5]; EF-hand_9 [PF14658.5]; SPARC_Ca_bdg [PF10591.8]; TerB [PF05099.12]	calcium ion binding [GO:0005509]	Ca2+-binding protein (EF-Hand superfamily) [COG5126]; Calmodulin and related proteins (EF-Hand superfamily) [KOG0027]; Calmodulin protein [meNOG10158]	SigP		SEG: 0.12 (29/236)	0.06	0.1	0.07	4.02	4.02	4.02	4.02	4.02	0.1	3.01	11.17	2.67	8.13	11.17	10.65
WBGene00000289	C01G6.8	cam-1	0.01	0	0.33	0	0	0	0.01	0	0	0	0	0.08	0.17	0.17	0.33	0.25	0.5	0.5	2	2	protein	769-928 aa	928				Fz [PF01392.21]; I-set [PF07679.15]; Ig_2 [PF13895.5]; Ig_3 [PF13927.5]; Kringle [PF00051.17]; Pkinase [PF00069.24]; Pkinase_Tyr [PF07714.16]; ig [PF00047.24]	ATP binding [GO:0005524]; Wnt-protein binding [GO:0017147]; axon [GO:0030424]; axon guidance [GO:0007411]; cell migration [GO:0016477]; cell projection [GO:0042995]; dendrite [GO:0030425]; establishment of neuroblast polarity [GO:0045200]; frizzled binding [GO:0005109]; hermaphrodite genitalia development [GO:0040035]; integral component of plasma membrane [GO:0005887]; locomotion [GO:0040011]; n…	Nerve growth factor receptor TRKA and related tyrosine kinases [KOG1026]; Receptor tyrosine kinase-like orphan receptor [meNOG03871]; Serine/threonine protein kinase [COG0515]	TM(1x)		SEG: 0.05 (42/928)	0.01	0.02	0.02	0.04	0.04	0.04	0.04	0.04	0.02	0.12	7.98	36.64	6.26	6.47	7.98
WBGene00000292	D2024.6	cap-1	0.01	0	0.02	0.01	0.01	0	0	0	0	0	0	0.02	0.01	0	0	1.07	0.94	0.06	0.29	1.07	protein	282 aa	282				F-actin_cap_A [PF01267.16]	F-actin capping protein complex [GO:0008290]; WASH complex [GO:0071203]; actin binding [GO:0003779]; actin cytoskeleton organization [GO:0030036]; apoptotic process [GO:0006915]; dynactin complex [GO:0005869]; embryo development ending in birth or egg hatching [GO:0009792]; nematode larval development [GO:0002119]; reproduction [GO:0000003]	Capping protein (actin filament) muscle Z-line, alpha [meNOG04393]; F-actin capping protein, alpha subunit [KOG0836]				0.31	0.29	0.02	0.09	0.31	0.29	0.31	0.31	0.31	19.35	54.38	104.22	54.2	53.58	54.38
WBGene00000293	M106.5	cap-2	0	0	0	0	0	0	0	0	0	0	0	0	0	0	0	2.33	0.29	0.14	0.43	2.33	protein	270 aa	270	Housekeeping			F_actin_cap_B [PF01115.16]	F-actin capping protein complex [GO:0008290]; WASH complex [GO:0071203]; actin binding [GO:0003779]; actin cytoskeleton organization [GO:0030036]; actin filament binding [GO:0051015]; body morphogenesis [GO:0010171]; cytoplasm [GO:0005737]; dynactin complex [GO:0005869]; embryo development ending in birth or egg hatching [GO:0009792]; embryonic axis specification [GO:0000578]; feminization of her…	Capping protein (actin filament) muscle Z-line, beta [meNOG00673]; F-actin capping protein, beta subunit [KOG3174]				0.07	0.02	0.01	0.03	0.07	0.03	0.07	0.07	0.07	44.2	59.95	102.75	58.92	58.2	59.95
WBGene00000294	F41G4.2	cas-1	0.02	0.02	0.01	0.02	0	0	0	0.02	0	0	0	0.01	0	0	0	12.88	0.08	0.03	0.06	12.88	protein	495-1256 aa	1256	Housekeeping			CAP_C [PF08603.10]; CAP_N [PF01213.18]	actin binding [GO:0003779]; cell morphogenesis [GO:0000902]; cytoskeleton organization [GO:0007010]	Adenylate cyclase-associated protein (CAP/Srv2p) [KOG2675]; Cyclase-Associated protein [meNOG04509]			SEG: 0.19 (93/495)	1.03	0.08	0.03	0.06	1.03	0.08	1.03	1.03	1.03	128.5	51.26	56.27	46.88	47.26	51.26
WBGene00000295	W01C8.6	cat-1	0	0.08	0.05	0	0	0	0	0.03	0.05	0.03	0.08	0.02	0.03	0.02	0.05	0.4	0.6	0.4	1.67	1.67	protein	490-553 aa	553				MFS_1 [PF07690.15]	dopamine biosynthetic process [GO:0042416]; feeding behavior [GO:0007631]; integral component of membrane [GO:0016021]; male mating behavior [GO:0060179]; monoamine transmembrane transporter activity [GO:0008504]; monoamine transport [GO:0015844]; synaptic vesicle [GO:0008021]; transmembrane transport [GO:0055085]; turning behavior involved in mating [GO:0034607]	Solute carrier family 18 (vesicular monoamine), member protein [meNOG03189]; Vesicular amine transporter [KOG3764]	TM(10x); TM(11x)		SEG: 0.08 (39/490)	0.02	0.03	0.02	0.05	0.05	0.05	0.05	0.05	0.03	0.97	10.12	0.63	7.36	10.12	7.83
WBGene00000296	B0432.5	cat-2	0.04	0.15	0.39	0.01	0.02	0.02	0.04	0.05	0.08	0.07	0.15	0.13	0.22	0.17	0.39	0.33	0.56	0.44	1.8	1.8	protein	454-524 aa	524				Biopterin_H [PF00351.20]	aromatic amino acid family metabolic process [GO:0009072]; axon [GO:0030424]; dopamine biosynthetic process [GO:0042416]; dopamine metabolic process [GO:0042417]; habituation [GO:0046959]; iron ion binding [GO:0005506]; male mating behavior [GO:0060179]; mechanosensory behavior [GO:0007638]; monooxygenase activity [GO:0004497]; oxidation-reduction process [GO:0055114]; oxidoreductase activity, ac…					0.03	0.05	0.04	0.09	0.09	0.09	0.09	0.09	0.05	0.23	2.09	0.61	1.24	2.09	1.31
WBGene00000298	F32G8.6	cat-4	0.04	0.04	0.03	0.01	0	0.04	0	0.01	0	0.04	0	0.01	0	0.03	0	0.25	0.01	4.01	0.02	4.01	protein	223 aa	223				GTP_cyclohydroI [PF01227.21]	GTP cyclohydrolase I activity [GO:0003934]; cytoplasm [GO:0005737]; dopamine biosynthetic process [GO:0042416]; dopamine metabolic process [GO:0042417]; male mating behavior [GO:0060179]; melanin biosynthetic process [GO:0042438]; tetrahydrofolate biosynthetic process [GO:0046654]; turning behavior involved in mating [GO:0034607]	GTP cyclohydrolase I [COG0302]; GTP cyclohydrolase I [KOG2698]; GTP cyclohydrolase [meNOG02135]				0.76	0.04	3.05	0.06	3.05	3.05	3.05	0.76	3.05	121.85	84.48	74.36	66.15	72.79	84.48
WBGene00000301	T13F2.8	cav-1	0.02	0	0.01	0.01	0.01	0.01	0.02	0	0	0	0	0	0.01	0	0.01	0.33	0.62	0.43	1.62	1.62	protein	126-276 aa	276				Caveolin [PF01146.16]	Ras protein signal transduction [GO:0007265]; caveola [GO:0005901]; cell cortex [GO:0005938]; cortical granule [GO:0060473]; cytoplasmic side of plasma membrane [GO:0009898]; growth [GO:0040007]; integral component of plasma membrane [GO:0005887]; locomotion [GO:0040011]; meiotic nuclear division [GO:0007126]; membrane raft [GO:0045121]; perinuclear region of cytoplasm [GO:0048471]; regulation of…	Caveolin [TWOG0057]; May act as a scaffolding protein within caveolar membranes. Interacts directly with G-protein alpha subunits and can functionally regulate their [euNOG04620]; May act as a scaffolding protein within caveolar membranes. Interacts directly with G-protein alpha subunits and can functionally regulate their [meNOG09583]	TM(2x)			0.07	0.13	0.09	0.21	0.21	0.21	0.21	0.21	0.13	18.38	12.45	101.11	3.45	2.14	12.45
WBGene00000302	C56A3.7	cav-2	0.12	0.04	0.71	0.04	0.07	0.05	0.12	0.01	0.03	0.02	0.04	0.24	0.42	0.29	0.71	0.33	0.59	0.41	1.69	1.69	protein	160-351 aa	351				Caveolin [PF01146.16]	caveola [GO:0005901]; cell surface receptor signaling pathway [GO:0007166]; regulation of oviposition [GO:0046662]; signal transducer activity [GO:0004871]	Caveolin [TWOG0057]	TM(2x)		SEG: 0.23 (73/319)	0.09	0.16	0.11	0.27	0.27	0.27	0.27	0.27	0.16	0.38	2.26	6.03	1.89	2.23	2.26
WBGene00000308	C04A11.t1		1.03	0.67	0.88	0.38	0.63	0.45	1.03	0.25	0.41	0.29	0.67	0.33	0.54	0.39	0.88	0.37	0.61	0.44	1.64	1.64	ncRNA												2.02	3.32	2.39	5.45	5.45	5.45	5.45	5.45	3.32	6.2	5.27	8.19	5.01	4.56	5.27
WBGene00000310	C05C9.t1		1.03	0.66	0.88	0.38	0.63	0.45	1.03	0.25	0.4	0.29	0.66	0.33	0.53	0.39	0.88	0.37	0.61	0.44	1.64	1.64	ncRNA												2.24	3.67	2.65	6.03	6.03	6.03	6.03	6.03	3.67	6.87	5.83	9.07	5.54	5.04	5.83
WBGene00000311	C05C9.t2		1.03	0.66	0.88	0.38	0.63	0.45	1.03	0.25	0.4	0.29	0.66	0.33	0.53	0.39	0.88	0.37	0.61	0.44	1.64	1.64	ncRNA												2.24	3.67	2.65	6.03	6.03	6.03	6.03	6.03	3.67	6.87	5.83	9.07	5.54	5.04	5.83
WBGene00000366	R10E11.1	cbp-1	0.01	0	0.24	0.01	0	0	0	0	0	0	0	0.24	0.02	0.02	0.03	7	0.07	0.07	0.14	7	protein	1977-2017 aa	2017		TF[Gupta]		Bromodomain [PF00439.24]; DUF902 [PF06001.12]; HAT_KAT11 [PF08214.10]; KIX [PF02172.15]; KIX_2 [PF16987.4]; ZZ [PF00569.16]; zf-TAZ [PF02135.15]	apoptotic process [GO:0006915]; cytoplasm [GO:0005737]; determination of adult lifespan [GO:0008340]; embryo development [GO:0009790]; embryo development ending in birth or egg hatching [GO:0009792]; hermaphrodite genitalia development [GO:0040035]; histone acetylation [GO:0016573]; histone acetyltransferase activity [GO:0004402]; inductive cell migration [GO:0040039]; internal peptidyl-lysine ac…			NCoils: 0.03 (57/2006); 0.03 (57/2017); 0.03 (57/1977)	SEG: 0.23 (458/2017)	0.14	0.01	0.01	0.02	0.14	0.02	0.14	0.14	0.14	0.58	14.53	41.85	11.92	11.75	14.53
WBGene00000367	C54D2.5	cca-1	0.02	0.02	0.19	0	0.01	0.01	0.02	0.01	0.01	0.01	0.02	0.05	0.1	0.1	0.19	0.25	0.5	0.5	2	2	protein	1418-1885 aa	1885				Ion_trans [PF00520.30]; PKD_channel [PF08016.11]	calcium ion transmembrane transport [GO:0070588]; ion channel activity [GO:0005216]; ion transport [GO:0006811]; low voltage-gated calcium channel activity [GO:0008332]; membrane [GO:0016020]; membrane depolarization [GO:0051899]; positive regulation of action potential [GO:0045760]; regulation of pharyngeal pumping [GO:0043051]; transmembrane transport [GO:0055085]; voltage-gated calcium channel…	Calcium channel, voltage-dependent, T type, alpha [meNOG03250]; Kef-type K+ transport systems, predicted NAD-binding component [COG1226]; T-type voltage-gated Ca2+ channel, pore-forming alpha1I subunit [KOG2302]	TM(16x); TM(23x)	NCoils: 0.07 (133/1837); 0.07 (133/1852); 0.07 (133/1885); 0.07 (133/1844); 0.08 (112/1418)	SEG: 0.13 (241/1885)	0.01	0.02	0.02	0.04	0.04	0.04	0.04	0.04	0.02	0.21	2.44	1.7	2.19	2.44	2.22
WBGene00000368	T28F2.5	ccb-1	0	0.01	1	0	0	0	0	0	0	0	0.01	0.5	0.5	0.5	1	0.5	0.5	0.5	2	2	protein	526 aa	526				Guanylate_kin [PF00625.20]; VGCC_beta4Aa_N [PF12052.7]	calcium ion transmembrane transport [GO:0070588]; locomotion [GO:0040011]; oviposition [GO:0018991]; positive regulation of locomotion [GO:0040017]; presynaptic active zone [GO:0048786]; protein binding [GO:0005515]; regulation of calcium ion transport [GO:0051924]; striated muscle contraction involved in embryonic body morphogenesis [GO:0061199]; voltage-gated calcium channel activity [GO:000524…	Calcium channel, voltage-dependent, beta [meNOG06161]; L-type voltage-dependent Ca2+ channel, beta subunit [KOG3812]			SEG: 0.09 (47/526)	0.01	0.01	0.01	0.02	0.02	0.02	0.02	0.02	0.01	0.02	6.69	3.44	6.1	6.69	5.79
WBGene00000369	Y56A3A.20	ccf-1	0	0	0.01	0	0	0	0	0	0	0	0	0.01	0.01	0	0.01	1	1	0.4	0.8	1	protein	310 aa	310				CAF1 [PF04857.19]	CCR4-NOT complex [GO:0030014]; P granule [GO:0043186]; apoptotic process [GO:0006915]; body morphogenesis [GO:0010171]; cytoplasm [GO:0005737]; cytoplasmic mRNA processing body [GO:0000932]; embryo development [GO:0009790]; embryo development ending in birth or egg hatching [GO:0009792]; germline cell cycle switching, mitotic to meiotic cell cycle [GO:0051729]; hermaphrodite genitalia development…	CCR4-NOT transcription complex, subunit [meNOG03261]; mRNA deadenylase subunit [COG5228]; mRNA deadenylase subunit [KOG0304]			SEG: 0.11 (33/310)	0.05	0.05	0.02	0.04	0.05	0.05	0.05	0.05	0.05	6.32	47.34	145.17	47.34	41.77	44.69
WBGene00000370	Y73F8A.6	ccg-1	0	0	0.02	0	0	0	0	0	0	0	0	0	0	0	0.02	0.06	0.19	0.06	5.17	5.17	protein	294 aa	294	Housekeeping						SigP	NCoils: 0.07 (21/294)		0.02	0.06	0.02	0.31	0.31	0.31	0.31	0.31	0.06	17.52	206.83	84.69	181.39	206.83	159.38
WBGene00000371	F26E4.9	cco-1	0.52	0.55	1	0.52	0.16	0.06	0.09	0.55	0.18	0.06	0.09	1	0.32	0.11	0.17	3.12	0.32	0.11	0.17	3.12	protein	132 aa	132	Housekeeping			COX5B [PF01215.18]	cytochrome-c oxidase activity [GO:0004129]; determination of adult lifespan [GO:0008340]; embryo development ending in birth or egg hatching [GO:0009792]; lipid metabolic process [GO:0006629]; lipid storage [GO:0019915]; mitochondrial ATP synthesis coupled proton transport [GO:0042776]; mitochondrial envelope [GO:0005740]; nematode larval development [GO:0002119]; reproduction [GO:0000003]	Cytochrome c oxidase [meNOG12905]; Cytochrome c oxidase, subunit Vb/COX4 [KOG3352]				334.75	107.18	37.78	56.52	334.75	107.18	334.75	334.75	334.75	334.34	649.58	606.21	649.58	582.45	496.66
WBGene00000372	T10B9.10	cyp-13A7	0.38	0.6	1	0.25	0.25	0.12	0.38	0.4	0.4	0.2	0.6	0.67	0.67	0.33	1	0.67	0.67	0.33	1.5	1.5	protein	518 aa	518				p450 [PF00067.21]	heme binding [GO:0020037]; iron ion binding [GO:0005506]; oxidation-reduction process [GO:0055114]; oxidoreductase activity, acting on paired donors, with incorporation or reduction of molecular oxygen [GO:0016705]	Cytochrome P450 CYP3/CYP5\/CYP6\/CYP9 subfamilies [KOG0158]; Cytochrome P450 [COG2124]; Cytochrome P450 protein [meNOG01902]	TM(2x)		SEG: 0.04 (22/518)	0.02	0.02	0.01	0.03	0.03	0.03	0.03	0.03	0.02	0.03	0.08	0.05	0.08	0.02	0.06
WBGene00000373	F08F3.7	cyp-14A5	0	0.01	0.5	0	0	0	0	0	0	0	0.01	0.17	0.33	0.17	0.5	0.33	0.67	0.33	1.5	1.5	protein	492 aa	492				p450 [PF00067.21]	heme binding [GO:0020037]; iron ion binding [GO:0005506]; oxidation-reduction process [GO:0055114]; oxidoreductase activity, acting on paired donors, with incorporation or reduction of molecular oxygen [GO:0016705]; response to gamma radiation [GO:0010332]	Cytochrome P450 CYP2 subfamily [KOG0156]; Cytochrome P450 [COG2124]; Cytochrome P450 protein [meNOG00186]	SigP			0.01	0.02	0.01	0.03	0.03	0.03	0.03	0.03	0.02	0.06	8.12	5.65	7.55	8.12	6.78
WBGene00000375	ZK177.5	cyp-44A1	0.01	0	0.62	0	0	0	0.01	0	0	0	0	0.25	0.38	0.25	0.62	0.4	0.6	0.4	1.67	1.67	protein	489 aa	489				p450 [PF00067.21]	heme binding [GO:0020037]; iron ion binding [GO:0005506]; oxidation-reduction process [GO:0055114]; oxidoreductase activity, acting on paired donors, with incorporation or reduction of molecular oxygen [GO:0016705]	Cytochrome P450 CYP11/CYP12\/CYP24\/CYP27 subfamilies [KOG0159]; Cytochrome P450 [COG2124]; Cytochrome P450 protein [meNOG00868]	TM(1x)		SEG: 0.05 (24/489)	0.02	0.03	0.02	0.05	0.05	0.05	0.05	0.05	0.03	0.08	8.31	29.47	8.07	7.68	8.31
WBGene00000376	ZC518.3	ccr-4	0.09	0.02	0.27	0.03	0.09	0	0	0.01	0.02	0	0	0.09	0.27	0.01	0.01	0.32	3.1	0.03	0.03	3.1	protein	400-677 aa	677	Housekeeping	TF[Gupta]		Exo_endo_phos [PF03372.22]	CCR4-NOT complex [GO:0030014]; collagen and cuticulin-based cuticle development [GO:0040002]; cytoplasm [GO:0005737]; determination of adult lifespan [GO:0008340]; embryo development ending in birth or egg hatching [GO:0009792]; locomotion [GO:0040011]; positive regulation of multicellular organism growth [GO:0040018]; protein binding [GO:0005515]; reproduction [GO:0000003]	CCR4-NOT transcription complex, subunit 6 [meNOG00617]; Glucose-repressible alcohol dehydrogenase transcriptional effector CCR4 and related proteins [KOG0620]; mRNA deadenylase, exonuclease subunit and related nucleases [COG5239]			SEG: 0.06 (44/677)	1.28	3.97	0.12	0.12	3.97	3.97	1.28	3.97	3.97	14.5	46.18	170.76	35.74	36.7	46.18
WBGene00000377	T05C12.7	cct-1	3.08	0.86	0.19	2.52	1.6	3.08	0.7	0.7	0.44	0.86	0.2	0.15	0.1	0.19	0.04	0.82	0.52	1.22	0.23	1.22	protein	549 aa	549	Housekeeping			Cpn60_TCP1 [PF00118.23]	ATP binding [GO:0005524]; apoptotic process [GO:0006915]; cellular protein metabolic process [GO:0044267]; chaperonin-containing T-complex [GO:0005832]; embryo development ending in birth or egg hatching [GO:0009792]; hermaphrodite genitalia development [GO:0040035]; inductive cell migration [GO:0040039]; nematode larval development [GO:0002119]; nucleus [GO:0005634]; receptor-mediated endocytosi…	Chaperonin GroEL (HSP60 family) [COG0459]; Chaperonin complex component, TCP-1 alpha subunit (CCT1) [KOG0360]; T-Complex protein 1 [meNOG01285]			SEG: 0.02 (12/549)	206.77	131.08	253.14	57.69	253.14	253.14	253.14	206.77	253.14	1348.47	82.13	294.81	75.75	81.35	82.13
WBGene00000378	T21B10.7	cct-2	0.01	0	0.01	0	0.01	0	0	0	0	0	0	0	0.01	0	0	0.45	2.2	0.01	0.03	2.2	protein	529 aa	529	Housekeeping			Cpn60_TCP1 [PF00118.23]	ATP binding [GO:0005524]; apoptotic process [GO:0006915]; cellular protein metabolic process [GO:0044267]; determination of adult lifespan [GO:0008340]; embryo development ending in birth or egg hatching [GO:0009792]; hermaphrodite genitalia development [GO:0040035]; nematode larval development [GO:0002119]; positive regulation of multicellular organism growth [GO:0040018]; protein folding [GO:00…	Chaperonin GroEL (HSP60 family) [COG0459]; Chaperonin complex component, TCP-1 beta subunit (CCT2) [KOG0363]; Chaperonin containing TCP1, subunit 2 (beta) [meNOG03638]			SEG: 0.06 (31/529)	0.35	0.77	0.01	0.02	0.77	0.77	0.35	0.77	0.77	107.15	91.97	267.58	91.97	79.81	91.95
WBGene00000379	K01C8.10	cct-4	0.85	0.42	0.09	0.4	0.6	0.23	0.85	0.2	0.3	0.12	0.42	0.04	0.07	0.03	0.09	0.47	0.71	0.28	1.41	1.41	protein	540 aa	540	Housekeeping			Cpn60_TCP1 [PF00118.23]	ATP binding [GO:0005524]; apoptotic process [GO:0006915]; body morphogenesis [GO:0010171]; cellular protein metabolic process [GO:0044267]; determination of adult lifespan [GO:0008340]; embryo development ending in birth or egg hatching [GO:0009792]; nematode larval development [GO:0002119]; post-embryonic body morphogenesis [GO:0040032]; protein folding [GO:0006457]; receptor-mediated endocytosi…	Chaperonin GroEL (HSP60 family) [COG0459]; Chaperonin complex component, TCP-1 delta subunit (CCT4) [KOG0358]; Chaperonin containing Tcp1, subunit 4 (delta) [meNOG01510]			SEG: 0.04 (23/540)	60.19	90.26	35.24	127.58	127.58	127.58	127.58	127.58	90.26	1378.86	150.74	303.23	137.21	129.44	150.74
WBGene00000380	C07G2.3	cct-5	0.01	0	0	0	0.01	0	0	0	0	0	0	0	0	0	0	0.18	5.45	0.06	0.15	5.45	protein	336-542 aa	542	Housekeeping			Cpn60_TCP1 [PF00118.23]	ATP binding [GO:0005524]; apoptotic process [GO:0006915]; cellular protein metabolic process [GO:0044267]; chaperonin-containing T-complex [GO:0005832]; embryo development ending in birth or egg hatching [GO:0009792]; hermaphrodite genitalia development [GO:0040035]; locomotion [GO:0040011]; nematode larval development [GO:0002119]; protein folding [GO:0006457]; receptor-mediated endocytosis [GO:…	Chaperonin GroEL (HSP60 family) [COG0459]; Chaperonin complex component, TCP-1 epsilon subunit (CCT5) [KOG0357]; Chaperonin containing TCP1, subunit 5 (epsilon) [meNOG11018]			SEG: 0.03 (17/542)	0.29	1.58	0.09	0.24	1.58	1.58	0.29	1.58	1.58	324.81	152.04	440.01	137.69	142.48	152.04
WBGene00000381	F01F1.8	cct-6	0	0	0.01	0	0	0	0	0	0	0	0	0	0.01	0	0.01	0.3	2.3	0.17	0.43	2.3	protein	429-539 aa	539	Housekeeping			Cpn60_TCP1 [PF00118.23]	ATP binding [GO:0005524]; apoptotic process [GO:0006915]; cellular protein metabolic process [GO:0044267]; determination of adult lifespan [GO:0008340]; embryo development ending in birth or egg hatching [GO:0009792]; hermaphrodite genitalia development [GO:0040035]; locomotion [GO:0040011]; nematode larval development [GO:0002119]; protein folding [GO:0006457]; reproduction [GO:0000003]; unfolde…	Chaperonin GroEL (HSP60 family) [COG0459]; Chaperonin complex component, TCP-1 zeta subunit (CCT6) [KOG0359]; Chaperonin containing TCP1, subunit [meNOG07024]			SEG: 0.11 (47/429)	0.07	0.23	0.04	0.1	0.23	0.23	0.1	0.23	0.23	18.98	95.85	256.63	83.45	87.75	95.85
WBGene00000382	C43E11.10	cdc-6	0.13	0.02	0.18	0.13	0.02	0.03	0.05	0.02	0	0	0.01	0.18	0.03	0.04	0.07	2.69	0.14	0.22	0.37	2.69	protein	518 aa	518				AAA [PF00004.28]; AAA_16 [PF13191.5]; AAA_22 [PF13401.5]; TIP49 [PF06068.12]	condensed nuclear chromosome [GO:0000794]; cytoplasm [GO:0005737]; embryo development ending in birth or egg hatching [GO:0009792]; hermaphrodite genitalia development [GO:0040035]; nematode larval development [GO:0002119]; nucleolus [GO:0005730]; nucleus [GO:0005634]; receptor-mediated endocytosis [GO:0006898]; reproduction [GO:0000003]; striated muscle myosin thick filament assembly [GO:0071688]	Cdc6-related protein, AAA superfamily ATPase [COG1474]; Cell division cycle 6 homolog (S. cerevisiae) protein [meNOG08639]; Pre-initiation complex, subunit CDC6, AAA+ superfamily ATPase [KOG2227]			SEG: 0.15 (79/518)	1.13	0.16	0.25	0.42	1.13	0.42	1.13	1.13	1.13	6.39	8.93	60.91	7.66	7.49	8.93
WBGene00000383	C17G10.4	cdc-14	0.01	0	0.01	0.01	0	0	0	0	0	0	0	0.01	0	0	0.01	1.22	0.55	0.36	0.82	1.22	protein	681-1063 aa	1063		TF[Gupta+Thomas+Walhout]		DSPc [PF00782.19]; DSPn [PF14671.5]; Y_phosphatase [PF00102.26]	astral microtubule [GO:0000235]; centrosome [GO:0005813]; cytoplasm [GO:0005737]; dephosphorylation [GO:0016311]; embryo development ending in birth or egg hatching [GO:0009792]; midbody [GO:0030496]; mitotic cell cycle arrest [GO:0071850]; mitotic cytokinesis [GO:0000281]; mitotic spindle midzone [GO:1990023]; nucleic acid binding [GO:0003676]; nucleolus [GO:0005730]; nucleus [GO:0005634]; phosp…	CDC14 cell division cycle 14 homolog protein [meNOG00623]; Predicted protein-tyrosine phosphatase [COG2453]; Protein tyrosine phosphatase CDC14 [KOG1720]; Tam3-transposase (Ac family) [KOG1121]			SEG: 0.07 (51/707)	0.11	0.06	0.04	0.09	0.11	0.09	0.11	0.11	0.11	13.23	20.04	82.61	16.79	17.21	20.04
WBGene00000386	K06A5.7	cdc-25.1	0.05	0.01	0.02	0.05	0.03	0	0	0.01	0	0	0	0.02	0.01	0	0	1.9	0.53	0.02	0.04	1.9	protein	604 aa	604	Housekeeping			Rhodanese [PF00581.19]	apoptotic process [GO:0006915]; cell division [GO:0051301]; cell proliferation [GO:0008283]; embryo development ending in birth or egg hatching [GO:0009792]; germline cell cycle switching, mitotic to meiotic cell cycle [GO:0051729]; intracellular [GO:0005622]; meiotic nuclear division [GO:0007126]; meiotic spindle organization [GO:0000212]; mitotic M phase [GO:0000087]; nucleus [GO:0005634]; phos…	Cell division cycle 25 homolog protein [meNOG08337]; M-phase inducer phosphatase [KOG3772]; Mitotic inducer, protein phosphatase [COG5105]			SEG: 0.10 (63/604)	0.91	0.48	0.02	0.04	0.91	0.48	0.91	0.91	0.91	49.28	18.45	128.57	16.45	15.56	18.45
WBGene00000387	F16B4.8	cdc-25.2	0.04	0	1.22	0.04	0	0	0.01	0	0	0	0	1.22	0.11	0.11	0.22	5.5	0.09	0.09	0.18	5.5	protein	480 aa	480				Rhodanese [PF00581.19]	body morphogenesis [GO:0010171]; embryo development ending in birth or egg hatching [GO:0009792]; intracellular [GO:0005622]; mitotic M phase [GO:0000087]; nematode larval development [GO:0002119]; protein dephosphorylation [GO:0006470]; protein tyrosine phosphatase activity [GO:0004725]; receptor-mediated endocytosis [GO:0006898]; reproduction [GO:0000003]	Cell division cycle 25 homolog C (S. pombe) protein [meNOG14522]; M-phase inducer phosphatase [KOG3772]; Mitotic inducer, protein phosphatase [COG5105]			SEG: 0.09 (43/480)	0.11	0.01	0.01	0.02	0.11	0.02	0.11	0.11	0.11	0.09	2.79	29.84	1.12	1.2	2.79
WBGene00000388	ZK637.11	cdc-25.3	0.16	0	0.16	0.06	0.09	0.06	0.16	0	0	0	0	0.06	0.1	0.06	0.16	0.4	0.6	0.4	1.67	1.67	protein	316 aa	316				Rhodanese [PF00581.19]	intracellular [GO:0005622]; mitotic M phase [GO:0000087]; mitotic cell cycle [GO:0000278]; nucleus [GO:0005634]; phosphoprotein phosphatase activity [GO:0004721]; protein dephosphorylation [GO:0006470]; protein tyrosine phosphatase activity [GO:0004725]	Cell division cycle 25 homolog C (S. pombe) protein [meNOG14522]; M-phase inducer phosphatase [KOG3772]; Mitotic inducer, protein phosphatase [COG5105]			SEG: 0.09 (27/316)	0.02	0.03	0.02	0.05	0.05	0.05	0.05	0.05	0.03	0.31	0.32	51.83	0.15	0.27	0.32
WBGene00000389	R05H5.2	cdc-25.4	0.05	2.52	0.57	0.05	0	0	0	2.52	0.06	0.05	0.11	0.57	0.01	0.01	0.02	23.43	0.02	0.02	0.04	23.43	protein	278 aa	278				Rhodanese [PF00581.19]	intracellular [GO:0005622]; mitotic M phase [GO:0000087]; protein dephosphorylation [GO:0006470]; protein tyrosine phosphatase activity [GO:0004725]	Cell division cycle 25 homolog C (S. pombe) protein [meNOG14522]; M-phase inducer phosphatase [KOG3772]; Mitotic inducer, protein phosphatase [COG5105]			SEG: 0.05 (13/278)	1.64	0.04	0.03	0.07	1.64	0.07	1.64	1.64	1.64	2.89	36.39	0.65	36.39	27.93	35.75
WBGene00000390	R07G3.1	cdc-42	0	0	0.03	0	0	0	0	0	0	0	0	0.01	0.02	0.01	0.03	0.4	0.6	0.4	1.67	1.67	protein	191 aa	191				Arf [PF00025.20]; Ras [PF00071.21]; Roc [PF08477.12]	GTP binding [GO:0005525]; GTP catabolic process [GO:0006184]; GTPase activity [GO:0003924]; body morphogenesis [GO:0010171]; cell cortex [GO:0005938]; cell migration [GO:0016477]; centrosome [GO:0005813]; collagen and cuticulin-based cuticle development [GO:0040002]; cytokinesis [GO:0000910]; cytoplasm [GO:0005737]; cytosol [GO:0005829]; embryo development ending in birth or egg hatching [GO:0009…	Cell division cycle 42 (GTP binding protein, 25kDa) [meNOG06956]; GTPase SAR1 and related small G proteins [COG1100]; Ras-related small GTPase, Rho type [KOG0393]				0.02	0.03	0.02	0.05	0.05	0.05	0.05	0.05	0.03	1.55	107.02	205.45	104.12	100.81	107.02
WBGene00000391	C47D2.2	cdd-1	0.03	0.09	0.26	0.03	0	0	0	0.09	0	0	0.01	0.26	0.01	0.01	0.02	15.29	0.04	0.03	0.07	15.29	protein	158 aa	158				dCMP_cyt_deam_1 [PF00383.22]; dCMP_cyt_deam_2 [PF08211.11]	RNA binding [GO:0003723]; RNA metabolic process [GO:0016070]; RNA modification [GO:0009451]; catalytic activity [GO:0003824]; cytidine deaminase activity [GO:0004126]; cytidine deamination [GO:0009972]; deoxycytidine catabolic process [GO:0006217]; deoxycytidine deaminase activity [GO:0047844]; hydrolase activity [GO:0016787]; intracellular [GO:0005622]; zinc ion binding [GO:0008270]	Cytidine deaminase [COG0295]; Cytidine deaminase [KOG0833]; Cytidine deaminase [meNOG20940]				1.07	0.04	0.03	0.07	1.07	0.07	1.07	1.07	1.07	4.13	33.62	11.67	33.41	33.62	27.17
WBGene00000392	F49E8.4	cdd-2	0	0	0.01	0	0	0	0	0	0	0	0	0	0.01	0	0.01	0.21	1.73	0.21	0.58	1.73	protein	166 aa	166				dCMP_cyt_deam_1 [PF00383.22]; dCMP_cyt_deam_2 [PF08211.11]	RNA binding [GO:0003723]; RNA modification [GO:0009451]; catalytic activity [GO:0003824]; cell [GO:0005623]; cytidine deaminase activity [GO:0004126]; cytidine deamination [GO:0009972]; deoxycytidine catabolic process [GO:0006217]; deoxycytidine deaminase activity [GO:0047844]; embryo development [GO:0009790]; hydrolase activity [GO:0016787]; zinc ion binding [GO:0008270]	Cytidine deaminase [COG0295]; Cytidine deaminase [KOG0833]; Cytidine deaminase [meNOG20940]				0.04	0.19	0.04	0.11	0.19	0.19	0.11	0.19	0.19	15.14	38.06	83.36	38.06	32.31	35.49
WBGene00000393	C15B12.7	cdf-1	0	0	0.2	0	0	0	0	0	0	0	0	0.05	0.15	0.1	0.2	0.25	0.75	0.5	1.33	1.33	protein	519-561 aa	561				Cation_efflux [PF01545.20]	cation transmembrane transporter activity [GO:0008324]; cation transport [GO:0006812]; cellular response to zinc ion [GO:0071294]; integral component of membrane [GO:0016021]; lipid storage [GO:0019915]; plasma membrane [GO:0005886]; positive regulation of Ras protein signal transduction [GO:0046579]; positive regulation of vulval development [GO:0040026]; response to zinc ion [GO:0010043]; trans…	Co/Zn\/Cd efflux system component [COG1230]; Solute carrier family 30 protein [meNOG00621]; Zn2+ transporter ZNT1 and related Cd2+\/Zn2+ transporters (cation diffusion facilitator superfamily) [KOG1483]	TM(6x)		SEG: 0.10 (50/519)	0.01	0.03	0.02	0.04	0.04	0.04	0.04	0.04	0.03	0.2	12.62	13.44	11.44	12.25	12.62
WBGene00000395	ZK112.7	cdh-3	0.05	0.01	0.33	0.05	0.05	0.05	0.05	0.01	0.01	0.01	0.01	0.33	0.33	0.33	0.33	1	1	1	1	1	protein	3343 aa	3343				Cadherin [PF00028.16]; Cadherin_2 [PF08266.11]; Cadherin_3 [PF16184.4]; Laminin_G_1 [PF00054.22]; Laminin_G_2 [PF02210.23]	calcium ion binding [GO:0005509]; cytoplasm [GO:0005737]; homophilic cell adhesion [GO:0007156]; membrane [GO:0016020]; morphogenesis of embryonic epithelium [GO:0016331]; plasma membrane [GO:0005886]; structural molecule activity [GO:0005198]; tail tip morphogenesis [GO:0045138]	FAT tumor suppressor homolog protein [meNOG02270]; Uncharacterized conserved protein, contains laminin, cadherin and EGF domains [KOG1219]	TM(2x)		SEG: 0.03 (100/3343)	0	0	0	0	0	0	0	0	0	0.03	0.22	0.92	0.1	0.1	0.22
WBGene00000396	F25F2.2	cdh-4	0	0	0.1	0	0	0	0	0	0	0	0	0.1	0.1	0.1	0.1	1	1	1	1	1	protein	1938-4292 aa	4292				Cadherin [PF00028.16]; Cadherin_2 [PF08266.11]; EGF [PF00008.26]; Laminin_G_1 [PF00054.22]; Laminin_G_2 [PF02210.23]	axon guidance [GO:0007411]; axonal fasciculation [GO:0007413]; calcium ion binding [GO:0005509]; establishment or maintenance of cell polarity [GO:0007163]; homophilic cell adhesion [GO:0007156]; membrane [GO:0016020]; protein binding [GO:0005515]	FAT tumor suppressor homolog protein [meNOG02270]; Uncharacterized conserved protein, contains laminin, cadherin and EGF domains [KOG1219]	SigP+TM(1x); TM(1x)		SEG: 0.03 (64/1938)	0	0.01	0	0.01	0.01	0.01	0.01	0.01	0.01	0.1	2.78	18.1	2.08	2.02	2.78
WBGene00000397	F08B4.2	cdh-5	0.05	0.08	1	0.01	0.03	0.03	0.05	0.02	0.04	0.04	0.08	0.25	0.5	0.5	1	0.25	0.5	0.5	2	2	protein	1299-1450 aa	1450				Cadherin [PF00028.16]	calcium ion binding [GO:0005509]; homophilic cell adhesion [GO:0007156]; membrane [GO:0016020]		TM(1x)		SEG: 0.10 (142/1450)	0.01	0.02	0.02	0.04	0.04	0.04	0.04	0.04	0.02	0.04	0.75	0.52	0.39	0.48	0.75
WBGene00000399	R05H10.6	cdh-7	0.01	0.06	0.02	0.01	0.01	0.01	0.01	0.06	0.06	0.06	0.06	0.02	0.02	0.02	0.02	1	1	1	1	1	protein	1364 aa	1364				Cadherin [PF00028.16]; Cadherin_pro [PF08758.10]	calcium ion binding [GO:0005509]; homophilic cell adhesion [GO:0007156]; membrane [GO:0016020]	FOG: Cadherin repeats [KOG3594]; Protein involved in cell-cell adhesion [meNOG15502]	SigP+TM(1x)		SEG: 0.04 (57/1364)	0	0.01	0	0.01	0.01	0.01	0.01	0.01	0.01	0.45	0.72	0.18	0.42	0.52	0.72
WBGene00000401	F59C12.1	cdh-9	0.03	0.03	1	0.01	0.01	0.01	0.03	0.01	0.01	0.01	0.03	0.5	0.5	0.5	1	0.5	0.5	0.5	2	2	protein	623 aa	623				Cadherin [PF00028.16]; Cadherin_3 [PF16184.4]	calcium ion binding [GO:0005509]; homophilic cell adhesion [GO:0007156]; membrane [GO:0016020]	FOG: Cadherin repeats [KOG3594]; Protein involved in homophilic cell adhesion [meNOG15510]	SigP+TM(1x)		SEG: 0.11 (69/623)	0.01	0.01	0.01	0.02	0.02	0.02	0.02	0.02	0.01	0.02	0.69	0.71	0.68	0.4	0.69
WBGene00000402	C45G7.5	cdh-10	0.01	0.05	1	0.01	0.01	0.01	0.01	0.05	0.05	0.05	0.05	1	1	1	1	1	1	1	1	1	protein	1775 aa	1775				Cadherin [PF00028.16]; Cadherin_2 [PF08266.11]	calcium ion binding [GO:0005509]; homophilic cell adhesion [GO:0007156]; membrane [GO:0016020]		SigP+TM(1x)	NCoils: 0.01 (21/1775)	SEG: 0.10 (169/1775)	0	0	0	0.01	0.01	0.01	0.01	0.01	0	0.01	0.75	0.21	0.48	0.37	0.75
WBGene00000403	B0034.3	casy-1	0	0.01	0.68	0	0	0	0	0	0	0	0.01	0.21	0.42	0.26	0.68	0.31	0.62	0.38	1.62	1.62	protein	160-984 aa	984				Cadherin [PF00028.16]	associative learning [GO:0008306]; calcium ion binding [GO:0005509]; embryo development ending in birth or egg hatching [GO:0009792]; extracellular space [GO:0005615]; homophilic cell adhesion [GO:0007156]; intracellular membrane-bounded organelle [GO:0043231]; membrane [GO:0016020]; neuronal cell body membrane [GO:0032809]; olfactory learning [GO:0008355]	Calsyntenin [KOG1834]; Calsyntenin protein [meNOG03540]	SigP+TM(1x); TM(1x)		SEG: 0.39 (62/160)	0.04	0.08	0.05	0.13	0.13	0.13	0.13	0.13	0.08	0.19	51.75	21.92	37.84	46.6	51.75
WBGene00000405	T05G5.3	cdk-1	0.1	0.03	0.03	0.08	0.08	0.1	0.03	0.02	0.02	0.03	0.01	0.03	0.03	0.03	0.01	0.78	0.78	1.28	0.27	1.28	protein	332 aa	332				Pkinase [PF00069.24]; Pkinase_Tyr [PF07714.16]	ATP binding [GO:0005524]; collagen and cuticulin-based cuticle development [GO:0040002]; cyclin-dependent protein serine/threonine kinase activity [GO:0004693]; cytoplasm [GO:0005737]; embryo development ending in birth or egg hatching [GO:0009792]; hermaphrodite genitalia development [GO:0040035]; locomotion [GO:0040011]; meiotic nuclear division [GO:0007126]; mitotic nuclear division [GO:000706…					4.43	4.41	5.68	1.53	5.68	5.68	5.68	4.43	5.68	162.7	54.56	220.1	54.56	45.96	52.79
WBGene00000406	F18H3.5	cdk-4	0.08	0.01	0.53	0.03	0.05	0.03	0.08	0	0	0	0.01	0.2	0.33	0.2	0.53	0.38	0.62	0.38	1.6	1.6	protein	342-406 aa	406				Kdo [PF06293.13]; Kinase-like [PF14531.5]; Pkinase [PF00069.24]; Pkinase_Tyr [PF07714.16]	ATP binding [GO:0005524]; G1/S transition of mitotic cell cycle [GO:0000082]; body morphogenesis [GO:0010171]; cell [GO:0005623]; embryo development ending in birth or egg hatching [GO:0009792]; hermaphrodite genitalia development [GO:0040035]; locomotion [GO:0040011]; meiotic nuclear division [GO:0007126]; mitotic nuclear division [GO:0007067]; nematode larval development [GO:0002119]; positive …	Cyclin-Dependent kinase [meNOG01319]; Protein kinase PCTAIRE and related kinases [KOG0594]; Serine/threonine protein kinase [COG0515]			SEG: 0.04 (16/406)	0.03	0.05	0.03	0.08	0.08	0.08	0.08	0.08	0.05	0.15	0.99	11	0.86	0.99	0.86
WBGene00000407	T27E9.3	cdk-5	1.19	0.68	0.37	1.19	0.15	0.62	0.07	0.68	0.08	0.35	0.04	0.37	0.05	0.19	0.02	1.91	0.12	0.52	0.06	1.91	protein	292 aa	292				Pkinase [PF00069.24]; Pkinase_Tyr [PF07714.16]	ATP binding [GO:0005524]; axon [GO:0030424]; embryo development ending in birth or egg hatching [GO:0009792]; protein kinase activity [GO:0004672]; protein phosphorylation [GO:0006468]; regulation of gene expression [GO:0010468]; regulation of protein localization [GO:0032880]; reproduction [GO:0000003]; synapse [GO:0045202]; synaptic transmission, GABAergic [GO:0051932]; synaptic vesicle transpo…	Cyclin dependent kinase 5 [meNOG07300]; Cyclin-dependent kinase CDK5 [KOG0662]; Serine/threonine protein kinase [COG0515]				33.8	4.2	17.7	1.97	33.8	17.7	33.8	33.8	33.8	92.49	28.38	49.9	21.67	20.77	28.38
WBGene00000408	Y39G10AL.3	cdk-7	0	0	0.01	0	0	0	0	0	0	0	0	0.01	0	0	0.01	1.25	0.5	0.3	0.8	1.25	protein	330 aa	330				Pkinase [PF00069.24]; Pkinase_Tyr [PF07714.16]	ATP binding [GO:0005524]; RNA polymerase II carboxy-terminal domain kinase activity [GO:0008353]; embryo development ending in birth or egg hatching [GO:0009792]; holo TFIIH complex [GO:0005675]; mRNA transcription [GO:0009299]; mitotic cell cycle, embryonic [GO:0045448]; protein kinase activity [GO:0004672]; protein phosphorylation [GO:0006468]; transferase activity, transferring phosphorus-cont…	Cdk activating kinase (CAK)/RNA polymerase II transcription initiation\/nucleotide excision repair factor TFIIH\/TFIIK, kinase subunit CDK7 [KOG0659]; Cyclin-Dependent kinase [meNOG02654]; Serine\/threonine protein kinase [COG0515]				0.1	0.05	0.03	0.08	0.1	0.08	0.1	0.1	0.1	15.36	26.04	68.89	24.81	21.88	26.04
WBGene00000409	F39H11.3	cdk-8	0.43	0.09	0.42	0.43	0	0	0	0.09	0	0	0	0.42	0	0	0	203	0	0	0	203	protein	588 aa	588				Pkinase [PF00069.24]; Pkinase_Tyr [PF07714.16]	ATP binding [GO:0005524]; body morphogenesis [GO:0010171]; embryo development ending in birth or egg hatching [GO:0009792]; negative regulation of vulval development [GO:0040027]; nematode larval development [GO:0002119]; protein kinase activity [GO:0004672]; protein phosphorylation [GO:0006468]; reproduction [GO:0000003]; transferase activity, transferring phosphorus-containing groups [GO:001677…	Cyclin C-dependent kinase CDK8 [KOG0666]; Cyclin-Dependent kinase [meNOG05403]; Serine/threonine protein kinase [COG0515]			SEG: 0.20 (117/588)	4.06	0.01	0.02	0.02	4.06	0.02	4.06	4.06	4.06	9.66	9.36	44.25	7.34	8.01	9.36
WBGene00000410	H25P06.2	cdk-9	0	0	0.02	0	0	0	0	0	0	0	0	0	0.01	0.01	0.02	0.29	0.57	0.43	1.75	1.75	protein	445-478 aa	478		TF[Gupta]		Pkinase [PF00069.24]; Pkinase_Tyr [PF07714.16]	ATP binding [GO:0005524]; chromosome [GO:0005694]; embryo development ending in birth or egg hatching [GO:0009792]; locomotion [GO:0040011]; nematode larval development [GO:0002119]; protein kinase activity [GO:0004672]; protein methylation [GO:0006479]; protein phosphorylation [GO:0006468]; transferase activity, transferring phosphorus-containing groups [GO:0016772]	Cyclin T-dependent kinase CDK9 [KOG0669]; Cyclin-Dependent kinase 9 [meNOG12805]; Serine/threonine protein kinase [COG0515]			SEG: 0.07 (33/478)	0.02	0.04	0.03	0.07	0.07	0.07	0.07	0.07	0.04	4.34	35.19	30.36	35.19	30.73	34.48
WBGene00000411	R06F6.1	cdl-1	0.07	0.01	0.01	0.07	0.01	0	0.01	0.01	0	0	0	0.01	0	0	0	5.03	0.11	0.07	0.2	5.03	protein	367 aa	367				SLBP_RNA_bind [PF15247.5]	RNA binding [GO:0003723]; RNA interference [GO:0016246]; apoptotic process [GO:0006915]; body morphogenesis [GO:0010171]; cytoplasm [GO:0005737]; embryo development [GO:0009790]; embryo development ending in birth or egg hatching [GO:0009792]; hermaphrodite genitalia development [GO:0040035]; mRNA 3'-UTR binding [GO:0003730]; mRNA binding [GO:0003729]; mitotic chromosome condensation [GO:0007076]…	Histone mRNA stem-loop binding protein [KOG3934]; Stem-Loop binding protein [meNOG07159]			SEG: 0.16 (58/367)	1.81	0.2	0.13	0.36	1.81	0.36	1.81	1.81	1.81	230.82	26.38	180.55	23.32	20.3	26.38
WBGene00000412	F35E8.11	cdr-1	0.04	0.09	0.09	0.04	0.02	0.01	0.03	0.09	0.03	0.03	0.06	0.09	0.03	0.02	0.06	1.57	0.36	0.27	0.64	1.57	protein	277 aa	277				GST_C [PF00043.24]; GST_C_2 [PF13410.5]; GST_C_3 [PF14497.5]; GST_C_6 [PF17171.3]; GST_N_3 [PF13417.5]; GST_N_4 [PF17172.3]	integral component of membrane [GO:0016021]; lysosome [GO:0005764]; protein binding [GO:0005515]; stress response to cadmium ion [GO:1990170]	Failed axon connections (fax) protein/glutathione S-transferase-like protein [KOG4244]; Protein involved in determination of adult lifespan [meNOG11004]	SigP		SEG: 0.04 (10/277)	0.11	0.04	0.03	0.07	0.11	0.07	0.11	0.11	0.11	1.21	2.59	1.19	2.59	1.68	1.47
WBGene00000413	Y54E10A.15	cdt-1	0.02	0	1.6	0.02	0	0	0.01	0	0	0	0	1.6	0.2	0.2	0.4	4	0.12	0.12	0.25	4	protein	684 aa	684				CDT1 [PF08839.10]; CDT1_C [PF16679.4]	DNA replication [GO:0006260]; body morphogenesis [GO:0010171]; cytoplasm [GO:0005737]; determination of adult lifespan [GO:0008340]; embryo development ending in birth or egg hatching [GO:0009792]; growth [GO:0040007]; hermaphrodite genitalia development [GO:0040035]; locomotion [GO:0040011]; nematode larval development [GO:0002119]; nucleus [GO:0005634]; reproduction [GO:0000003]	DNA replication factor [KOG4762]; DNA replication factor [meNOG07320]		NCoils: 0.03 (21/684)	SEG: 0.10 (69/684)	0.08	0.01	0.01	0.02	0.08	0.02	0.08	0.08	0.08	0.05	3.43	35.08	3.05	2.49	3.43
WBGene00000414	ZK1236.2	cec-1	0	0	0.06	0	0	0	0	0	0	0	0	0.01	0.04	0.03	0.06	0.25	0.75	0.5	1.33	1.33	protein	304 aa	304				Chromo [PF00385.23]		Uncharacterized conserved protein, contains chromo domain [KOG2748]		NCoils: 0.24 (74/304)	SEG: 0.70 (213/304)	0.01	0.03	0.02	0.04	0.04	0.04	0.04	0.04	0.03	0.67	12.66	20.57	12.57	12.47	12.66
WBGene00000415	Y47H9C.4	ced-1	0	0	0.9	0	0	0	0	0	0	0	0	0.5	0.6	0.4	0.9	0.56	0.67	0.44	1.5	1.5	protein	49-1111 aa	1111				Laminin_EGF [PF00053.23]	defense response [GO:0006952]; determination of adult lifespan [GO:0008340]; engulfment of apoptotic cell [GO:0043652]; phagocytic cup [GO:0001891]; phagocytic vesicle membrane [GO:0030670]; plasma membrane [GO:0005886]; protein binding [GO:0005515]; pseudopodium membrane [GO:0031260]; recognition of apoptotic cell [GO:0043654]; scavenger receptor activity [GO:0005044]	Multiple EGF-like-domains protein [meNOG01570]; Proteins containing Ca2+-binding EGF-like domains [KOG1218]	SigP+TM(1x)		SEG: 0.31 (15/49)	0.05	0.06	0.04	0.09	0.09	0.09	0.09	0.09	0.06	0.1	21.97	39.99	21.97	18.43	20.91
WBGene00000416	Y41D4B.13	ced-2	0.02	0.01	0.2	0.01	0.01	0.01	0.02	0	0	0	0.01	0.07	0.12	0.08	0.2	0.35	0.59	0.43	1.68	1.68	protein	29-279 aa	279				SH2 [PF00017.23]; SH3_1 [PF00018.27]; SH3_2 [PF07653.16]; SH3_9 [PF14604.5]	SH3/SH2 adaptor activity [GO:0005070]; cell migration [GO:0016477]; engulfment of apoptotic cell [GO:0043652]; plasma membrane [GO:0005886]; programmed cell death [GO:0012501]; protein binding [GO:0005515]	Crk family adapters [KOG4792]; V-Crk sarcoma virus CT10 oncogene homolog (avian) protein [meNOG04997]			SEG: 0.14 (15/105)	0.13	0.22	0.16	0.37	0.37	0.37	0.37	0.37	0.22	1.89	16.73	73.27	16.73	13.37	15.05
WBGene00000417	C48D1.2	ced-3	0.01	0	0.53	0	0	0	0.01	0	0	0	0	0.18	0.29	0.24	0.53	0.33	0.56	0.44	1.8	1.8	protein	287-503 aa	503				CARD [PF00619.20]; Peptidase_C14 [PF00656.21]	apoptotic process [GO:0006915]; cell death [GO:0008219]; cysteine-type endopeptidase activity [GO:0004197]; cysteine-type endopeptidase activity involved in execution phase of apoptosis [GO:0097200]; cysteine-type peptidase activity [GO:0008234]; cytoplasm [GO:0005737]; determination of adult lifespan [GO:0008340]; embryo development ending in birth or egg hatching [GO:0009792]; endopeptidase act…	Caspase, apoptotic cysteine protease [KOG3573]; Protein involved in programmed cell death [meNOG09821]			SEG: 0.12 (60/503)	0.03	0.05	0.04	0.09	0.09	0.09	0.09	0.09	0.05	0.17	15.42	107.69	14.71	13.01	15.42
WBGene00000418	C35D10.9	ced-4	0.01	0	0.01	0	0	0	0.01	0	0	0	0	0	0.01	0	0.01	0.4	0.6	0.4	1.67	1.67	protein	549-571 aa	571				CARD [PF00619.20]; NB-ARC [PF00931.21]	ADP binding [GO:0043531]; ATP binding [GO:0005524]; BH1 domain binding [GO:0051432]; BH3 domain binding [GO:0051434]; apoptotic process [GO:0006915]; cell death [GO:0008219]; cytosol [GO:0005829]; embryo development ending in birth or egg hatching [GO:0009792]; embryonic morphogenesis [GO:0048598]; endopeptidase activator activity [GO:0061133]; membrane [GO:0016020]; mitochondrion [GO:0005739]; p…	Apoptotic ATPase [KOG4658]; Apoptotic peptidase activating factor 1 [meNOG02738]				0.02	0.03	0.02	0.05	0.05	0.05	0.05	0.05	0.03	4.67	8.16	29.71	8.16	6.27	7.45
WBGene00000419	C02F4.1	ced-5	0	0	0.01	0	0	0	0	0	0	0	0	0.01	0.01	0.01	0.01	1	1	1	1	1	protein	1781 aa	1781				DHR-2 [PF06920.12]; DOCK-C2 [PF14429.5]; DOCK_N [PF16172.4]	binding [GO:0005488]; cell migration [GO:0016477]; engulfment of apoptotic cell [GO:0043652]; guanyl-nucleotide exchange factor activity [GO:0005085]; inductive cell migration [GO:0040039]; plasma membrane [GO:0005886]; protein binding [GO:0005515]; small GTPase mediated signal transduction [GO:0007264]; small GTPase regulator activity [GO:0005083]	Dedicator of cytokinesis protein [meNOG02721]; Signaling protein DOCK180 [KOG1998]		NCoils: 0.03 (49/1781)	SEG: 0.02 (35/1781)	0	0	0	0.01	0.01	0.01	0.01	0.01	0	0.7	11.88	28.59	10.57	9.66	11.88
WBGene00000420	F56D2.7	ced-6	0.01	0	0.01	0.01	0	0	0	0	0	0	0	0.01	0	0	0	3.5	0.14	0.14	0.29	3.5	protein	492 aa	492		TF[Gupta]		PID [PF00640.22]; PTB [PF08416.12]	cytoplasmic side of plasma membrane [GO:0009898]; engulfment of apoptotic cell [GO:0043652]; phagocytic vesicle [GO:0045335]; programmed cell death [GO:0012501]; protein binding [GO:0005515]; protein phosphorylated amino acid binding [GO:0045309]; scavenger receptor binding [GO:0005124]	Adaptor protein CED-6, contains PTB domain [KOG3536]; GULP, engulfment adaptor PTB domain containing 1 protein [meNOG02247]		NCoils: 0.04 (21/492)	SEG: 0.25 (123/492)	0.07	0.01	0.01	0.02	0.07	0.02	0.07	0.07	0.07	13.36	10.2	42.65	10.2	10.01	9.77
WBGene00000421	C48B4.4	ced-7	0	0	0.01	0	0	0	0	0	0	0	0	0	0	0	0.01	0.67	0.67	0.33	1.5	1.5	protein	1689-1758 aa	1758				AAA_21 [PF13304.5]; ABC2_membrane_3 [PF12698.6]; ABC_tran [PF00005.26]	ATP binding [GO:0005524]; ATPase activity [GO:0016887]; ATPase activity, coupled to transmembrane movement of substances [GO:0042626]; engulfment of apoptotic cell [GO:0043652]; plasma membrane [GO:0005886]; programmed cell death [GO:0012501]; transport [GO:0006810]	ABC-type multidrug transport system, ATPase component [COG1131]; Atp-Binding cassette, sub-family A protein [meNOG02662]; Lipid exporter ABCA1 and related proteins, ABC superfamily [KOG0059]	TM(15x); TM(16x)	NCoils: 0.01 (21/1758)	SEG: 0.03 (61/1758)	0.02	0.02	0.01	0.03	0.03	0.03	0.03	0.03	0.02	4.72	14.02	44.81	12.12	11.87	14.02
WBGene00000422	F08F1.5	ced-8	0.14	0	1	0.05	0.09	0.05	0.14	0	0	0	0	0.33	0.67	0.33	1	0.33	0.67	0.33	1.5	1.5	protein	458 aa	458				XK-related [PF09815.8]	embryo development [GO:0009790]; engulfment of apoptotic cell [GO:0043652]; plasma membrane [GO:0005886]; programmed cell death [GO:0012501]; transporter activity [GO:0005215]	Uncharacterized conserved protein [KOG4790]; XK, Kell blood group complex subunit-related family, member [meNOG04529]	TM(9x)		SEG: 0.03 (15/458)	0.01	0.02	0.01	0.03	0.03	0.03	0.03	0.03	0.02	0.03	0.22	6.23	0.21	0.15	0.22
WBGene00000423	T07C4.8	ced-9	0	0	0.03	0	0	0	0	0	0	0	0	0.01	0.02	0.02	0.03	0.25	0.5	0.5	2	2	protein	280 aa	280				BH4 [PF02180.16]; Bcl-2 [PF00452.18]	GTPase activator activity [GO:0005096]; apoptotic process [GO:0006915]; cell death [GO:0008219]; embryo development ending in birth or egg hatching [GO:0009792]; membrane [GO:0016020]; mitochondrial outer membrane [GO:0005741]; mitochondrion [GO:0005739]; negative regulation of apoptotic process [GO:0043066]; negative regulation of programmed cell death [GO:0043069]; organelle membrane [GO:003109…	Anti-apoptotic Bcl-2 family proteins, prevent opening of mitochondrial porin channel [KOG4728]; Bcl2-Like 2 protein [meNOG05580]	TM(1x)		SEG: 0.06 (17/280)	0.01	0.02	0.02	0.04	0.04	0.04	0.04	0.04	0.02	1.19	11.44	80.17	11.2	11.44	10.01
WBGene00000424	C09G12.8	ced-10	0	0	0.44	0	0	0	0	0	0	0	0	0.16	0.44	0.2	0.44	0.36	1	0.45	1	1	protein	129-191 aa	191				Arf [PF00025.20]; Ras [PF00071.21]; Roc [PF08477.12]	GTP binding [GO:0005525]; GTP catabolic process [GO:0006184]; GTPase activity [GO:0003924]; axon extension involved in axon guidance [GO:0048846]; axon guidance [GO:0007411]; axon regeneration [GO:0031103]; body morphogenesis [GO:0010171]; cell migration [GO:0016477]; cytoplasmic side of plasma membrane [GO:0009898]; cytoplasmic vesicle [GO:0031410]; dorsal/ventral axon guidance [GO:0033563]; eng…	GTPase SAR1 and related small G proteins [COG1100]; Ras-Related C3 botulinum toxin substrate protein [meNOG02920]; Ras-related small GTPase, Rho type [KOG0393]				0.04	0.11	0.05	0.11	0.11	0.11	0.11	0.11	0.11	0.25	25.23	47.78	25.23	21.51	20.38
WBGene00000425	ZK512.3	ced-11	0.01	0.01	0.09	0.01	0.01	0.01	0.01	0.01	0.01	0.01	0.01	0.09	0.09	0.09	0.09	1	1	1	1	1	protein	1418 aa	1418					apoptotic process [GO:0006915]	Ca2+/Mg2+-permeable cation channels (LTRPC family) [KOG3614]	TM(7x)		SEG: 0.05 (71/1418)	0	0.01	0	0.01	0.01	0.01	0.01	0.01	0.01	0.11	1.51	1.36	1.13	1.28	1.51
WBGene00000426	Y106G6E.5	ced-12	0	0	0	0	0	0	0	0	0	0	0	0	0	0	0	0.67	0.67	0.67	1.5	1.5	protein	731-738 aa	738				DUF3361 [PF11841.7]; ELMO_CED12 [PF04727.12]; PH_12 [PF16457.4]	Rho GTPase binding [GO:0017048]; SH3 domain binding [GO:0017124]; actin filament organization [GO:0007015]; binding [GO:0005488]; cell migration [GO:0016477]; cytoplasm [GO:0005737]; cytoskeleton [GO:0005856]; embryo development ending in birth or egg hatching [GO:0009792]; engulfment of apoptotic cell [GO:0043652]; gonad morphogenesis [GO:0035262]; inductive cell migration [GO:0040039]; phagocyt…	Engulfment and cell motility protein [meNOG03785]; Regulator of Rac1, required for phagocytosis and cell migration [KOG2999]			SEG: 0.06 (45/738)	0.02	0.02	0.02	0.03	0.03	0.03	0.03	0.03	0.02	7.49	13.51	39.05	12.52	10.04	13.51
WBGene00000427	R09F10.9	ced-13	1.46	0.9	1	0.54	0.85	0.62	1.46	0.33	0.52	0.38	0.9	0.37	0.58	0.42	1	0.37	0.58	0.42	1.73	1.73	protein	98 aa	98				EGL-1 [PF11430.7]	BH domain binding [GO:0051400]; intrinsic apoptotic signaling pathway in response to DNA damage by p53 class mediator [GO:0042771]; positive regulation of apoptotic process [GO:0043065]		SigP			0.07	0.11	0.08	0.19	0.19	0.19	0.19	0.19	0.11	0.19	0.13	0.21	0.13	0.12	0.13
WBGene00000428	F16H11.4	ceh-1	0.21	0.1	0.14	0.07	0.12	0.09	0.21	0.03	0.06	0.04	0.1	0.05	0.08	0.06	0.14	0.33	0.58	0.42	1.71	1.71	protein	132 aa	132		TF[Gupta+Thomas+Walhout]		Homeobox [PF00046.28]	DNA binding [GO:0003677]	Protein involved in regulation of generation of precursor metabolites and energy [meNOG18074]; Transcription factor BarH and related HOX domain proteins [KOG0488]			SEG: 0.12 (16/132)	0.04	0.07	0.05	0.12	0.12	0.12	0.12	0.12	0.07	0.85	0.58	1.17	0.48	0.43	0.58
WBGene00000429	C27A12.5	ceh-2	0.1	0.17	0.54	0.04	0.07	0.04	0.1	0.07	0.12	0.07	0.17	0.23	0.38	0.23	0.54	0.43	0.71	0.43	1.4	1.4	protein	209 aa	209		TF[Gupta+Thomas+Walhout]		Homeobox [PF00046.28]	DNA binding [GO:0003677]; nucleus [GO:0005634]	Transcription factor EMX1 and related HOX domain proteins [KOG0843]		NCoils: 0.11 (22/209)	SEG: 0.20 (42/209)	0.03	0.05	0.03	0.07	0.07	0.07	0.07	0.07	0.05	0.13	0.68	0.41	0.3	0.68	0.47
WBGene00000430	C16C2.1	ceh-5	0.16	0.05	0.38	0.06	0.1	0.06	0.16	0.02	0.03	0.02	0.05	0.15	0.24	0.15	0.38	0.38	0.62	0.38	1.62	1.62	protein	134 aa	134		TF[Gupta+Thomas+Walhout]		Homeobox [PF00046.28]	DNA binding [GO:0003677]	Transcription factor EMX1 and related HOX domain proteins [KOG0843]; Ventral anterior homeobox 2 protein [meNOG11157]			SEG: 0.09 (12/134)	0.05	0.08	0.05	0.13	0.13	0.13	0.13	0.13	0.08	0.34	0.8	2.64	0.6	0.8	0.71
WBGene00000431	K02B12.1	ceh-6	0.01	0.05	1	0	0.01	0	0.01	0.02	0.03	0.02	0.05	0.33	0.67	0.33	1	0.33	0.67	0.33	1.5	1.5	protein	380 aa	380		TF[Gupta+Thomas+Walhout]		Homeobox [PF00046.28]; Pou [PF00157.16]	DNA binding [GO:0003677]; body morphogenesis [GO:0010171]; cell differentiation [GO:0030154]; cytoplasm [GO:0005737]; cytosol [GO:0005829]; excretion [GO:0007588]; locomotion [GO:0040011]; molting cycle, collagen and cuticulin-based cuticle [GO:0018996]; nematode larval development [GO:0002119]; nucleus [GO:0005634]; regulation of transcription, DNA-templated [GO:0006355]; reproduction [GO:000000…	POU class 3 homeobox protein [meNOG08226]; Transcription factor OCT-1, contains POU and HOX domains [KOG3802]			SEG: 0.12 (45/380)	0.01	0.02	0.01	0.03	0.03	0.03	0.03	0.03	0.02	0.03	2.23	0.65	1.43	1.93	2.23
WBGene00000432	C34C6.8	ceh-7	0.16	0.82	0.89	0.06	0.1	0.07	0.16	0.31	0.49	0.37	0.82	0.33	0.53	0.4	0.89	0.37	0.6	0.45	1.67	1.67	protein	84 aa	84		TF[Gupta+Thomas+Walhout]		Homeobox [PF00046.28]	DNA binding [GO:0003677]	Transcription factor EMX1 and related HOX domain proteins [KOG0843]; Ventral anterior homeobox 1 protein [meNOG12447]	SigP			0.15	0.24	0.18	0.4	0.4	0.4	0.4	0.4	0.24	0.45	2.51	0.49	2.43	1.9	2.51
WBGene00000433	ZK265.4	ceh-8	0.05	0.22	0.11	0.02	0.03	0.02	0.05	0.07	0.15	0.07	0.22	0.04	0.08	0.04	0.11	0.33	0.67	0.33	1.5	1.5	protein	276 aa	276		TF[Gupta+Thomas+Walhout]		Homeobox [PF00046.28]	DNA binding [GO:0003677]; nucleus [GO:0005634]; pattern specification process [GO:0007389]; sequence-specific DNA binding transcription factor activity [GO:0003700]	Retina and anterior neural fold homeobox protein [meNOG14404]; Transcription factor, contains HOX domain [KOG0490]			SEG: 0.14 (39/276)	0.02	0.04	0.02	0.06	0.06	0.06	0.06	0.06	0.04	0.53	1.32	0.27	0.83	1.32	1.13
WBGene00000434	Y65B4BR.9	ceh-9	0.14	0.16	0.27	0.05	0.08	0.06	0.14	0.06	0.09	0.07	0.16	0.09	0.16	0.11	0.27	0.35	0.59	0.41	1.7	1.7	protein	147 aa	147		TF[Gupta+Thomas+Walhout]		Homeobox [PF00046.28]	DNA binding [GO:0003677]	Transcription factor NKX-5.1/HMX1, contains HOX domain [KOG0485]				0.06	0.1	0.07	0.17	0.17	0.17	0.17	0.17	0.1	0.64	1.25	1.07	1.25	1.13	0.47
WBGene00000435	W03A3.1	ceh-10	0.11	0.08	0.12	0.04	0.06	0.04	0.11	0.03	0.05	0.03	0.08	0.05	0.07	0.05	0.12	0.4	0.6	0.4	1.67	1.67	protein	344 aa	344		TF[Gupta+Thomas+Walhout]		Homeobox [PF00046.28]	DNA binding [GO:0003677]; cell differentiation [GO:0030154]; cell fate specification [GO:0001708]; locomotion [GO:0040011]; neuron migration [GO:0001764]; nucleus [GO:0005634]; oviposition [GO:0018991]; regulation of cell migration [GO:0030334]; sequence-specific DNA binding transcription factor activity [GO:0003700]	Transcription factor CHX10 and related HOX domain proteins [KOG0494]; Visual system homeobox protein [meNOG10600]			SEG: 0.19 (66/344)	0.02	0.03	0.02	0.05	0.05	0.05	0.05	0.05	0.03	0.41	0.47	0.59	0.47	0.45	0.41
WBGene00000436	F33D11.4	ceh-12	0.36	0.31	0.37	0.14	0.22	0.14	0.36	0.12	0.19	0.12	0.31	0.14	0.23	0.14	0.37	0.38	0.62	0.38	1.62	1.62	protein	180 aa	180		TF[Gupta+Thomas+Walhout]		Homeobox [PF00046.28]	DNA binding [GO:0003677]	Motor neuron and pancreas homeobox protein [meNOG13087]; Transcription factor zerknullt and related HOX domain proteins [KOG0489]			SEG: 0.23 (42/180)	0.05	0.08	0.05	0.13	0.13	0.13	0.13	0.13	0.08	0.35	0.36	0.42	0.17	0.23	0.36
WBGene00000437	R13A5.5	ceh-13	0.01	0.01	0.22	0	0.01	0	0.01	0	0.01	0	0.01	0.09	0.13	0.09	0.22	0.4	0.6	0.4	1.67	1.67	protein	202 aa	202		TF[Gupta+Thomas+Walhout]		Homeobox [PF00046.28]	DNA binding [GO:0003677]; axon guidance [GO:0007411]; axonal fasciculation [GO:0007413]; body morphogenesis [GO:0010171]; cytoplasm [GO:0005737]; dendrite development [GO:0016358]; embryo development [GO:0009790]; embryo development ending in birth or egg hatching [GO:0009792]; locomotion [GO:0040011]; nematode larval development [GO:0002119]; nucleus [GO:0005634]; positive regulation of multicel…	Sequence-Specific transcription factor which is part of a developmental regulatory system that provides cells with specific positional identities on the anterior-posterior [meNOG08667]; Transcription factor zerknullt and related HOX domain proteins [KOG0489]		NCoils: 0.10 (21/202)	SEG: 0.21 (43/202)	0.02	0.03	0.02	0.05	0.05	0.05	0.05	0.05	0.03	0.23	4.48	5.08	4.48	3.69	3.71
WBGene00000438	F46C8.5	ceh-14	0.07	0.03	0.11	0.03	0.04	0.03	0.07	0.01	0.02	0.01	0.03	0.04	0.06	0.04	0.11	0.4	0.6	0.4	1.67	1.67	protein	351 aa	351		TF[Gupta+Thomas+Walhout]		Homeobox [PF00046.28]; Homeobox_KN [PF05920.10]; LIM [PF00412.21]	DNA binding [GO:0003677]; nucleus [GO:0005634]; protein binding [GO:0005515]; sequence-specific DNA binding transcription factor activity [GO:0003700]; thermosensory behavior [GO:0040040]; zinc ion binding [GO:0008270]	Lim/Homeobox protein [meNOG00732]; Transcription factor LIM3, contains LIM and HOX domains [KOG4577]				0.02	0.03	0.02	0.05	0.05	0.05	0.05	0.05	0.03	0.47	0.74	1.71	0.56	0.74	0.74
WBGene00000439	C13G5.1	ceh-16	0.3	0.22	0.38	0.1	0.18	0.13	0.3	0.08	0.13	0.1	0.22	0.13	0.23	0.17	0.38	0.35	0.61	0.43	1.64	1.64	protein	187 aa	187		TF[Gupta+Thomas+Walhout]		Homeobox [PF00046.28]	DNA binding [GO:0003677]; embryo development ending in birth or egg hatching [GO:0009792]; embryonic body morphogenesis [GO:0010172]; epidermal cell fate specification [GO:0009957]; formation of anatomical boundary [GO:0048859]; locomotion [GO:0040011]; negative regulation of transcription from RNA polymerase II promoter [GO:0000122]; nucleus [GO:0005634]; plasma membrane fusion [GO:0045026]; pos…	Engrailed protein [meNOG01567]; Transcription factor Engrailed, contains HOX domain [KOG0493]			SEG: 0.24 (44/187)	0.08	0.14	0.1	0.23	0.23	0.23	0.23	0.23	0.14	0.6	0.77	1.05	0.37	0.53	0.77
WBGene00000440	D1007.1	ceh-17	0.28	0.31	0.29	0.09	0.16	0.12	0.28	0.1	0.17	0.14	0.31	0.1	0.16	0.13	0.29	0.33	0.56	0.44	1.8	1.8	protein	237 aa	237		TF[Gupta+Thomas+Walhout]		DLL_N [PF12413.7]; Homeobox [PF00046.28]	DNA binding [GO:0003677]; axon guidance [GO:0007411]; nucleus [GO:0005634]; regulation of axon extension [GO:0030516]; sequence-specific DNA binding transcription factor activity [GO:0003700]	Paired-Like homeobox protein [meNOG06920]; Transcription factor PHOX2/ARIX, contains HOX domain [KOG0484]			SEG: 0.15 (36/237)	0.03	0.05	0.04	0.09	0.09	0.09	0.09	0.09	0.05	0.31	0.32	0.29	0.18	0.32	0.25
WBGene00000441	ZC64.3	ceh-18	0.01	0.02	0.28	0	0.01	0	0.01	0.01	0.01	0.01	0.02	0.1	0.17	0.1	0.28	0.38	0.62	0.38	1.6	1.6	protein	417-542 aa	542		TF[Gupta+Thomas+Walhout]		Homeobox [PF00046.28]; Pou [PF00157.16]	DNA binding [GO:0003677]; determination of adult lifespan [GO:0008340]; embryo development ending in birth or egg hatching [GO:0009792]; epidermis development [GO:0008544]; germ cell migration [GO:0008354]; negative regulation of oocyte maturation [GO:1900194]; nucleus [GO:0005634]; oocyte maturation [GO:0001556]; ovulation [GO:0030728]; regulation of transcription, DNA-templated [GO:0006355]; re…	POU class 2 homeobox 2 protein [meNOG12167]; Transcription factor OCT-1, contains POU and HOX domains [KOG3802]			SEG: 0.16 (87/542)	0.03	0.05	0.03	0.08	0.08	0.08	0.08	0.08	0.05	0.29	8.11	4.51	6.24	8.11	5.93
WBGene00000442	F20D12.6	ceh-19	0.07	0.11	0.53	0.02	0.04	0.03	0.07	0.04	0.06	0.05	0.11	0.19	0.33	0.23	0.53	0.35	0.61	0.43	1.64	1.64	protein	122-199 aa	199		TF[Gupta+Thomas+Walhout]		Homeobox [PF00046.28]	DNA binding [GO:0003677]	Transcription factor BarH and related HOX domain proteins [KOG0488]			SEG: 0.16 (31/199)	0.08	0.14	0.1	0.23	0.23	0.23	0.23	0.23	0.14	0.43	3.29	2.16	3.29	3.06	2.48
WBGene00000443	F31E3.1	ceh-20	0	0	0.17	0	0	0	0	0	0	0	0	0.04	0.09	0.09	0.17	0.25	0.5	0.5	2	2	protein	338 aa	338		TF[Gupta+Thomas+Walhout]		Homeobox [PF00046.28]; Homeobox_KN [PF05920.10]; PBC [PF03792.12]	DNA binding [GO:0003677]; RNA polymerase II transcription coactivator binding [GO:0001225]; anterior/posterior pattern specification [GO:0009952]; body morphogenesis [GO:0010171]; cell migration [GO:0016477]; embryo development ending in birth or egg hatching [GO:0009792]; locomotion [GO:0040011]; mesoderm development [GO:0007498]; mesodermal cell fate specification [GO:0007501]; muscle cell diff…	Pre-B-Cell leukemia protein [meNOG01940]; Transcription factor PBX and related HOX domain proteins [KOG0774]		NCoils: 0.06 (21/338)	SEG: 0.09 (31/338)	0.01	0.02	0.02	0.04	0.04	0.04	0.04	0.04	0.02	0.23	13.24	17.35	11.5	12.06	13.24
WBGene00000444	T26C11.6	ceh-21	0.02	0	0	0.01	0.01	0.01	0.02	0	0	0	0	0	0	0	0	0.5	0.5	0.5	2	2	protein	495 aa	495		TF[Gupta+Thomas+Walhout]		CUT [PF02376.14]; Homeobox [PF00046.28]	DNA binding [GO:0003677]	Unnamed protein [LSE1080]			SEG: 0.15 (76/495)	0.01	0.01	0.01	0.02	0.02	0.02	0.02	0.02	0.01	15.44	0.84	11.09	0.78	0.69	0.84
WBGene00000445	F29F11.5	ceh-22	0.11	0.2	0.06	0.04	0.07	0.04	0.11	0.07	0.12	0.08	0.2	0.02	0.04	0.03	0.06	0.33	0.6	0.4	1.67	1.67	protein	215-346 aa	346		TF[Gupta+Thomas+Walhout]		Homeobox [PF00046.28]	DNA binding [GO:0003677]; nucleus [GO:0005634]; pharyngeal muscle development [GO:0043282]; positive regulation of transcription from RNA polymerase II promoter [GO:0045944]; receptor-mediated endocytosis [GO:0006898]; sequence-specific DNA binding [GO:0043565]	Protein involved in ventral spinal cord interneuron fate determination [meNOG12786]; Transcription factor tinman/NKX2-3, contains HOX domain [KOG0842]	SigP		SEG: 0.23 (81/346)	0.05	0.09	0.06	0.15	0.15	0.15	0.15	0.15	0.09	2.37	1.36	0.74	1.04	1.36	1.06
WBGene00000446	ZK652.5	ceh-23	0.1	0.1	0.26	0.04	0.06	0.04	0.1	0.04	0.06	0.04	0.1	0.11	0.16	0.11	0.26	0.4	0.6	0.4	1.67	1.67	protein	305 aa	305		TF[Gupta+Thomas+Walhout]		Homeobox [PF00046.28]	DNA binding [GO:0003677]; nucleus [GO:0005634]	Developing brain homeobox protein [meNOG08009]; Transcription factor EMX1 and related HOX domain proteins [KOG0843]			SEG: 0.17 (51/305)	0.02	0.03	0.02	0.05	0.05	0.05	0.05	0.05	0.03	0.19	0.51	0.5	0.27	0.51	0.44
WBGene00000447	F55B12.1	ceh-24	0.17	0.13	1.17	0.05	0.1	0.07	0.17	0.04	0.08	0.06	0.13	0.33	0.67	0.5	1.17	0.29	0.57	0.43	1.75	1.75	protein	299 aa	299		TF[Gupta+Thomas+Walhout]		Homeobox [PF00046.28]	DNA binding [GO:0003677]; embryo development ending in birth or egg hatching [GO:0009792]; locomotion [GO:0040011]; nucleus [GO:0005634]; regulation of transcription elongation from RNA polymerase II promoter [GO:0034243]; reproduction [GO:0000003]; sequence-specific DNA binding RNA polymerase II transcription factor activity [GO:0000981]	Protein involved in menarche [meNOG06050]; Transcription factor tinman/NKX2-3, contains HOX domain [KOG0842]			SEG: 0.23 (69/299)	0.02	0.04	0.03	0.07	0.07	0.07	0.07	0.07	0.04	0.06	0.41	0.52	0.32	0.41	0.28
WBGene00000448	K12H4.1	pros-1	0.01	0.02	0.03	0	0	0	0.01	0.01	0.01	0.01	0.02	0.01	0.01	0.01	0.03	0.5	0.5	0.5	2	2	protein	594 aa	594		TF[Gupta+Thomas+Walhout]		HPD [PF05044.11]	DNA binding [GO:0003677]; locomotion [GO:0040011]; molting cycle, collagen and cuticulin-based cuticle [GO:0018996]; multicellular organismal development [GO:0007275]; nematode larval development [GO:0002119]; nucleus [GO:0005634]; regulation of transcription from RNA polymerase II promoter [GO:0006357]; regulation of transcription, DNA-templated [GO:0006355]; sequence-specific DNA binding RNA po…	Homeobox transcription factor prospero [KOG3779]; Prospero homeobox protein [meNOG03277]			SEG: 0.29 (171/594)	0.01	0.01	0.01	0.02	0.02	0.02	0.02	0.02	0.01	0.67	3.23	0.96	2.68	2.91	3.23
WBGene00000449	F46F3.1	ceh-27	0.12	0.08	1.11	0.04	0.07	0.05	0.12	0.03	0.05	0.03	0.08	0.39	0.67	0.44	1.11	0.35	0.6	0.4	1.67	1.67	protein	170-263 aa	263		TF[Gupta+Thomas+Walhout]		Homeobox [PF00046.28]; Homeobox_KN [PF05920.10]	DNA binding [GO:0003677]; body morphogenesis [GO:0010171]; embryo development ending in birth or egg hatching [GO:0009792]; nematode larval development [GO:0002119]; nucleus [GO:0005634]; regulation of transcription elongation from RNA polymerase II promoter [GO:0034243]; reproduction [GO:0000003]; sequence-specific DNA binding RNA polymerase II transcription factor activity [GO:0000981]	Protein involved in menarche [meNOG06050]; Transcription factor tinman/NKX2-3, contains HOX domain [KOG0842]			SEG: 0.24 (64/263)	0.07	0.12	0.08	0.2	0.2	0.2	0.2	0.2	0.12	0.18	1.63	2.46	1.21	1.47	1.63
WBGene00000450	K03A11.3	ceh-28	1.5	0.9	1.12	0.5	0.83	0.67	1.5	0.3	0.5	0.4	0.9	0.38	0.62	0.5	1.12	0.33	0.56	0.44	1.8	1.8	protein	201 aa	201		TF[Gupta+Thomas+Walhout]		Homeobox [PF00046.28]	DNA binding [GO:0003677]; nucleus [GO:0005634]; positive regulation of transcription from RNA polymerase II promoter [GO:0045944]; regulation of synapse organization [GO:0050807]; regulation of transcription elongation from RNA polymerase II promoter [GO:0034243]; regulation of transcription from RNA polymerase II promoter [GO:0006357]; sequence-specific DNA binding RNA polymerase II transcriptio…	Transcription factor tinman/NKX2-3, contains HOX domain [KOG0842]			SEG: 0.03 (7/201)	0.03	0.05	0.04	0.09	0.09	0.09	0.09	0.09	0.05	0.08	0.06	0.1	0.06	0.05	0.06
WBGene00000451	C33D12.7	ceh-30	0.14	0.05	1	0.06	0.08	0.06	0.14	0.02	0.03	0.02	0.05	0.4	0.6	0.4	1	0.4	0.6	0.4	1.67	1.67	protein	237 aa	237		TF[Gupta+Thomas+Walhout]		Homeobox [PF00046.28]	DNA binding [GO:0003677]; nucleus [GO:0005634]	Barh-Like homeobox 2 protein [meNOG06124]; Transcription factor BarH and related HOX domain proteins [KOG0488]	SigP		SEG: 0.23 (55/237)	0.02	0.03	0.02	0.05	0.05	0.05	0.05	0.05	0.03	0.05	0.36	0.95	0.08	0.24	0.36
WBGene00000452	C33D12.1	ceh-31	0.06	0.08	0.23	0.02	0.03	0.02	0.06	0.03	0.05	0.03	0.08	0.09	0.14	0.09	0.23	0.4	0.6	0.4	1.67	1.67	protein	260 aa	260		TF[Gupta+Thomas+Walhout]		Homeobox [PF00046.28]	DNA binding [GO:0003677]	Barh-Like homeobox 2 protein [meNOG06124]; Transcription factor BarH and related HOX domain proteins [KOG0488]	SigP		SEG: 0.08 (20/260)	0.02	0.03	0.02	0.05	0.05	0.05	0.05	0.05	0.03	0.22	0.87	0.64	0.86	0.87	0.75
WBGene00000453	W05E10.3	ceh-32	0.01	0	1	0	0	0	0.01	0	0	0	0	0.5	0.5	0.5	1	0.5	0.5	0.5	2	2	protein	439 aa	439		TF[Gupta+Thomas+Walhout]		Homeobox [PF00046.28]; Homeobox_KN [PF05920.10]; SIX1_SD [PF16878.4]	DNA binding [GO:0003677]; body morphogenesis [GO:0010171]; embryo development ending in birth or egg hatching [GO:0009792]; locomotion [GO:0040011]; nematode larval development [GO:0002119]; nucleus [GO:0005634]; post-embryonic morphogenesis [GO:0009886]; regulation of transcription, DNA-templated [GO:0006355]; sequence-specific DNA binding transcription factor activity [GO:0003700]	Protein involved in forebrain anterior/posterior pattern formation [meNOG09790]; Transcription factor SIX and related HOX domain proteins [KOG0775]			SEG: 0.18 (77/439)	0.01	0.01	0.01	0.02	0.02	0.02	0.02	0.02	0.01	0.02	3.1	4.22	1.74	2.18	3.1
WBGene00000454	C10G8.7	ceh-33	0.05	0.07	0.54	0.02	0.03	0.02	0.05	0.03	0.05	0.03	0.07	0.23	0.38	0.23	0.54	0.43	0.71	0.43	1.4	1.4	protein	261 aa	261		TF[Gupta+Thomas+Walhout]		Homeobox [PF00046.28]; Homeobox_KN [PF05920.10]; SIX1_SD [PF16878.4]	DNA binding [GO:0003677]; regulation of transcription, DNA-templated [GO:0006355]; sequence-specific DNA binding transcription factor activity [GO:0003700]	Protein involved in myoblast migration [meNOG03520]; Transcription factor SIX and related HOX domain proteins [KOG0775]			SEG: 0.02 (6/261)	0.03	0.05	0.03	0.07	0.07	0.07	0.07	0.07	0.05	0.13	1.47	0.99	1.47	1.37	0.58
WBGene00000455	C10G8.6	ceh-34	0.02	0.02	1	0.01	0.01	0.01	0.02	0.01	0.01	0.01	0.02	0.4	0.6	0.4	1	0.4	0.6	0.4	1.67	1.67	protein	256 aa	256		TF[Gupta+Thomas+Walhout]		Homeobox [PF00046.28]; Homeobox_KN [PF05920.10]; SIX1_SD [PF16878.4]	DNA binding [GO:0003677]; apoptotic process [GO:0006915]; mesodermal cell fate specification [GO:0007501]; nucleus [GO:0005634]; sequence-specific DNA binding [GO:0043565]	Protein involved in myoblast migration [meNOG03520]; Transcription factor SIX and related HOX domain proteins [KOG0775]			SEG: 0.06 (16/256)	0.02	0.03	0.02	0.05	0.05	0.05	0.05	0.05	0.03	0.05	3.02	2.65	3.02	2.82	2.82
WBGene00000457	C37E2.4	ceh-36	0.23	0.06	0.04	0.06	0.13	0.1	0.23	0.02	0.03	0.03	0.06	0.01	0.02	0.02	0.04	0.29	0.57	0.43	1.75	1.75	protein	257 aa	257		TF[Gupta+Thomas+Walhout]		Homeobox [PF00046.28]	DNA binding [GO:0003677]; embryo development ending in birth or egg hatching [GO:0009792]; nucleus [GO:0005634]	Homeobox transcription factor [KOG2251]			SEG: 0.48 (124/257)	0.02	0.04	0.03	0.07	0.07	0.07	0.07	0.07	0.04	1.7	0.31	1.16	0.1	0.22	0.31
WBGene00000458	C37E2.5	ceh-37	0.02	0.03	0.12	0.01	0.01	0.01	0.02	0.01	0.02	0.01	0.03	0.04	0.07	0.05	0.12	0.36	0.57	0.43	1.75	1.75	protein	243-278 aa	278		TF[Gupta+Thomas+Walhout]		Homeobox [PF00046.28]	DNA binding [GO:0003677]; chromosome, telomeric region [GO:0000781]; mRNA transcription [GO:0009299]; neuron fate specification [GO:0048665]; regulation of transcription from RNA polymerase II promoter [GO:0006357]; telomere maintenance [GO:0000723]; telomeric DNA binding [GO:0042162]	Cone-Rod homeobox protein [meNOG14413]; Homeobox transcription factor [KOG2251]			SEG: 0.18 (43/243)	0.05	0.08	0.06	0.14	0.14	0.14	0.14	0.14	0.08	1.21	5.93	4.32	5.93	5.02	5.69
WBGene00000459	F22D3.1	ceh-38	0	0	0.14	0	0	0	0	0	0	0	0	0.05	0.1	0.05	0.14	0.33	0.67	0.33	1.5	1.5	protein	632-641 aa	641		TF[Gupta+Thomas+Walhout]		CUT [PF02376.14]; Homeobox [PF00046.28]	DNA binding [GO:0003677]	CCAAT displacement protein and related homeoproteins [KOG2252]; Protein involved in pancreas development [meNOG03929]			SEG: 0.19 (117/632)	0.01	0.02	0.01	0.03	0.03	0.03	0.03	0.03	0.02	0.21	13.13	58.31	10.99	10.5	13.13
WBGene00000460	T26C11.7	ceh-39	0.04	0	0.14	0.01	0.02	0.01	0.04	0	0	0	0	0.05	0.1	0.05	0.14	0.33	0.67	0.33	1.5	1.5	protein	399 aa	399		TF[Gupta+Thomas+Walhout]		CUT [PF02376.14]; Homeobox [PF00046.28]	DNA binding [GO:0003677]; condensed nuclear chromosome [GO:0000794]; germ cell nucleus [GO:0043073]; negative regulation of transcription from RNA polymerase II promoter [GO:0000122]; nucleus [GO:0005634]; primary sex determination [GO:0007538]	CCAAT displacement protein and related homeoproteins [KOG2252]; Protein involved in pancreas development [meNOG03929]			SEG: 0.05 (20/399)	0.01	0.02	0.01	0.03	0.03	0.03	0.03	0.03	0.02	0.21	0.81	24.61	0.77	0.55	0.81
WBGene00000461	F17A2.5	ceh-40	0.12	0.01	0.02	0.07	0.07	0.05	0.12	0	0	0	0.01	0.01	0.01	0.01	0.02	0.6	0.6	0.4	1.67	1.67	protein	329 aa	329		TF[Gupta+Thomas+Walhout]		Homeobox [PF00046.28]; Homeobox_KN [PF05920.10]; PBC [PF03792.12]	DNA binding [GO:0003677]; embryo development ending in birth or egg hatching [GO:0009792]; nematode larval development [GO:0002119]; nucleus [GO:0005634]; sequence-specific DNA binding transcription factor activity [GO:0003700]	Pre-B-Cell leukemia protein [meNOG01940]; Transcription factor PBX and related HOX domain proteins [KOG0774]		NCoils: 0.06 (21/329)		0.03	0.03	0.02	0.05	0.05	0.05	0.05	0.05	0.03	2.5	0.42	7.61	0.15	0.23	0.42
WBGene00000462	T26C11.5	ceh-41	0.02	0.01	0.57	0	0.01	0.01	0.02	0	0	0	0.01	0.14	0.29	0.29	0.57	0.25	0.5	0.5	2	2	protein	278 aa	278		TF[Gupta+Thomas+Walhout]		Homeobox [PF00046.28]	DNA binding [GO:0003677]	Unnamed protein [LSE1080]			SEG: 0.17 (47/278)	0.01	0.02	0.02	0.04	0.04	0.04	0.04	0.04	0.02	0.07	2.18	7.38	2.18	1.45	1.7
WBGene00000463	C28A5.4	ceh-43	0.02	0.01	0.04	0.01	0.01	0.01	0.02	0	0	0	0.01	0.02	0.02	0.02	0.04	0.4	0.6	0.4	1.67	1.67	protein	273 aa	273		TF[Gupta+Thomas+Walhout]		Homeobox [PF00046.28]	DNA binding [GO:0003677]; cell adhesion [GO:0007155]; embryo development [GO:0009790]; embryo development ending in birth or egg hatching [GO:0009792]; locomotion [GO:0040011]; nematode larval development [GO:0002119]; reproduction [GO:0000003]; sequence-specific DNA binding transcription factor activity [GO:0003700]	Distal-Less homeobox protein [meNOG01121]; Forkhead/HNF-3-related transcription factor [KOG3563]; Transcription factor DLX and related proteins with LIM Zn-binding and HOX domains [KOG0850]			SEG: 0.11 (31/273)	0.02	0.03	0.02	0.05	0.05	0.05	0.05	0.05	0.03	1.26	2.94	6.38	1.5	2.64	2.94
WBGene00000464	Y54F10AM.4	ceh-44	0	0	0.01	0	0	0	0	0	0	0	0	0	0.01	0	0.01	0.4	0.6	0.4	1.67	1.67	protein	619-1273 aa	1273		TF[Gupta+Thomas+Walhout]		CUT [PF02376.14]; Homeobox [PF00046.28]	DNA binding [GO:0003677]; integral component of Golgi membrane [GO:0030173]; intra-Golgi vesicle-mediated transport [GO:0006891]	CCAAT displacement protein and related homeoproteins [KOG2252]; Cut-Like homeobox protein [meNOG00049]; Transcription factor/CCAAT displacement protein CDP1 [KOG0963]	TM(1x)	NCoils: 0.19 (247/1273); 0.43 (268/619); 0.43 (268/621)	SEG: 0.07 (85/1273)	0.02	0.03	0.02	0.05	0.05	0.05	0.05	0.05	0.03	5.83	32.13	43.67	32.13	26.18	30.25
WBGene00000465	C07G2.1	cpg-1	23.23	0.54	0.31	23.23	11.67	6.19	8.33	0.54	0.27	0.14	0.19	0.31	0.16	0.08	0.11	1.99	0.5	0.27	0.36	1.99	protein	160-584 aa	584				CBM_14 [PF01607.23]	chitin binding [GO:0008061]; chitin metabolic process [GO:0006030]; eggshell formation [GO:0030703]; embryo development ending in birth or egg hatching [GO:0009792]; extracellular region [GO:0005576]; regulation of cytokinesis [GO:0032465]	Chitin binding protein [euNOG20641]; Chitin binding protein [meNOG20570]; Unnamed protein [TWOG0222]	SigP		SEG: 0.29 (168/584)	1131.15	568.21	301.53	405.55	1131.15	568.21	1131.15	1131.15	1131.15	3592.52	48.69	2082.71	37.86	34.24	48.69
WBGene00000466	C03D6.3	cel-1	0	0	0.03	0	0	0	0	0	0	0	0	0.01	0.02	0.01	0.03	0.4	0.6	0.4	1.67	1.67	protein	573-623 aa	623				DNA_ligase_A_M [PF01068.20]; DSPc [PF00782.19]; mRNA_cap_C [PF03919.14]; mRNA_cap_enzyme [PF01331.18]	7-methylguanosine mRNA capping [GO:0006370]; RNA-dependent ATPase activity [GO:0008186]; body morphogenesis [GO:0010171]; dephosphorylation [GO:0016311]; determination of adult lifespan [GO:0008340]; embryo development ending in birth or egg hatching [GO:0009792]; intracellular [GO:0005622]; lipid storage [GO:0019915]; locomotion [GO:0040011]; mRNA guanylyltransferase activity [GO:0004484]; mRNA …	RNA guanylyltransferase and 5'-phosphatase [meNOG00594]; mRNA capping enzyme, guanylyltransferase (alpha) subunit [COG5226]; mRNA capping enzyme, guanylyltransferase (alpha) subunit [KOG2386]			SEG: 0.07 (42/623)	0.02	0.03	0.02	0.05	0.05	0.05	0.05	0.05	0.03	1.61	13.56	36.14	12.6	11.6	13.56
WBGene00000467	F52B5.5	cep-1	0.08	0.04	0.1	0.01	0.08	0	0.02	0	0.04	0	0.01	0.01	0.1	0	0.03	0.11	3.72	0.02	0.27	3.72	protein	197-644 aa	644		TF[Gupta+Thomas+Walhout]		CEP1-DNA_bind [PF09287.9]	DNA binding [GO:0003677]; apoptotic process [GO:0006915]; dauer entry [GO:0043053]; determination of adult lifespan [GO:0008340]; embryo development ending in birth or egg hatching [GO:0009792]; intrinsic apoptotic signaling pathway in response to DNA damage by p53 class mediator [GO:0042771]; meiotic chromosome segregation [GO:0045132]; nucleolus [GO:0005730]; nucleoplasm [GO:0005654]; nucleus […				SEG: 0.07 (13/197)	0.23	2.01	0.04	0.54	2.01	2.01	0.54	2.01	2.01	20.38	25.14	50.01	23.84	18.64	25.14
WBGene00000468	F43G9.11	ces-1	0.47	0.18	0.03	0.13	0.27	0.2	0.47	0.05	0.11	0.08	0.18	0.01	0.02	0.01	0.03	0.29	0.57	0.43	1.75	1.75	protein	270 aa	270		TF[Gupta+Thomas+Walhout]		zf-C2H2 [PF00096.25]; zf-C2H2_11 [PF16622.4]; zf-C2H2_4 [PF13894.5]; zf-C2H2_6 [PF13912.5]; zf-C2H2_jaz [PF12171.7]; zf-H2C2_2 [PF13465.5]; zf-met [PF12874.6]	asymmetric cell division [GO:0008356]; metal ion binding [GO:0046872]; negative regulation of programmed cell death [GO:0043069]; negative regulation of transcription from RNA polymerase II promoter [GO:0000122]; nucleic acid binding [GO:0003676]; nucleus [GO:0005634]; sequence-specific DNA binding [GO:0043565]	C2H2-type Zn-finger protein [KOG2462]; FOG: Zn-finger [COG5048]; Zinc finger protein [meNOG02413]			SEG: 0.10 (27/270)	0.02	0.04	0.03	0.07	0.07	0.07	0.07	0.07	0.04	2.01	0.15	0.38	0.15	0.13	0.15
WBGene00000469	ZK909.4	ces-2	0.07	0.03	0.02	0.02	0.03	0.02	0.07	0.01	0.02	0.01	0.03	0.01	0.01	0.01	0.02	0.33	0.5	0.33	2	2	protein	211 aa	211		TF[Gupta+Thomas+Walhout]		bZIP_2 [PF07716.14]	RNA polymerase II regulatory region DNA binding [GO:0001012]; apoptotic process [GO:0006915]; asymmetric cell division [GO:0008356]; positive regulation of programmed cell death [GO:0043068]; regulation of transcription, DNA-templated [GO:0006355]; sequence-specific DNA binding [GO:0043565]; sequence-specific DNA binding transcription factor activity [GO:0003700]	Basic region leucine zipper transcription factor [KOG3119]; Protein dimerization [meNOG21580]		NCoils: 0.10 (21/211)	SEG: 0.27 (58/211)	0.02	0.03	0.02	0.06	0.06	0.06	0.06	0.06	0.03	2.73	0.88	1.99	0.68	0.11	0.88
WBGene00000472	F33A8.3	cey-1	0	0	0.01	0	0	0	0	0	0	0	0	0.01	0	0	0.01	0.56	0.16	0.06	1.78	1.78	protein	208 aa	208	Housekeeping	TF[Gupta+Thomas+Walhout]		CSD [PF00313.21]	DNA binding [GO:0003677]; endoplasmic reticulum [GO:0005783]; nucleic acid binding [GO:0003676]; regulation of transcription, DNA-templated [GO:0006355]	Cold shock proteins [COG1278]; Predicted RNA-binding protein containing PIN domain and invovled in translation or RNA processing [KOG3070]; Y box binding protein [meNOG05737]			SEG: 0.36 (74/208)	0.18	0.05	0.02	0.32	0.32	0.32	0.32	0.32	0.18	28.69	348.14	353.65	322.91	348.14	347.98
WBGene00000473	F46F11.2	cey-2	12.95	1.19	0.5	9.7	10.16	3.51	12.95	0.89	0.93	0.32	1.19	0.38	0.39	0.14	0.5	0.75	0.78	0.27	1.27	1.27	protein	267 aa	267		TF[Gupta+Thomas+Walhout]		CSD [PF00313.21]	DNA binding [GO:0003677]; nucleic acid binding [GO:0003676]; regulation of transcription, DNA-templated [GO:0006355]	Cold shock proteins [COG1278]; Predicted RNA-binding protein containing PIN domain and invovled in translation or RNA processing [KOG3070]			SEG: 0.16 (43/267)	1852.87	1941.69	670.28	2473.8	2473.8	2473.8	2473.8	2473.8	1941.69	4925.39	191.07	2077.11	191.07	169.02	182.38
WBGene00000474	M01E11.5	cey-3	59.46	7.18	4.98	3.4	10.72	9.38	59.46	0.41	1.29	1.13	7.18	0.28	0.9	0.79	4.98	0.06	0.18	0.16	5.55	5.55	protein	265 aa	265		TF[Gupta+Thomas+Walhout]		CSD [PF00313.21]	DNA binding [GO:0003677]; nucleic acid binding [GO:0003676]; regulation of transcription, DNA-templated [GO:0006355]; ribonucleoprotein complex [GO:0030529]; ribonucleoprotein complex binding [GO:0043021]			NCoils: 0.09 (24/265)	SEG: 0.07 (19/265)	357.57	1128.98	987.92	6260.64	6260.64	6260.64	6260.64	6260.64	1128.98	1256.67	105.3	872.11	103.84	105.3	101.38
WBGene00000475	Y39A1C.3	cey-4	0.03	0.02	0.02	0.03	0.02	0.01	0.03	0.02	0.01	0.01	0.02	0.02	0.01	0.01	0.02	1.09	0.53	0.37	0.92	1.09	protein	294 aa	294	Housekeeping	TF[Gupta+Thomas+Walhout]		CSD [PF00313.21]	DNA binding [GO:0003677]; nucleic acid binding [GO:0003676]; regulation of transcription, DNA-templated [GO:0006355]; ribonucleoprotein complex [GO:0030529]; ribonucleoprotein complex binding [GO:0043021]	Predicted RNA-binding protein containing PIN domain and invovled in translation or RNA processing [KOG3070]		NCoils: 0.07 (21/294)	SEG: 0.36 (105/294)	10.09	5.32	3.77	9.27	10.09	9.27	10.09	10.09	10.09	576.26	303.92	586.42	303.92	298.48	275.44
WBGene00000476	T23D8.8	cfi-1	0.01	0.02	1.33	0	0	0	0.01	0.01	0.01	0.01	0.02	0.33	0.67	0.33	1.33	0.25	0.5	0.25	2	2	protein	467 aa	467		TF[Gupta+Thomas+Walhout]		ARID [PF01388.20]	DNA binding [GO:0003677]; cell fate commitment [GO:0045165]; intracellular [GO:0005622]; negative regulation of transcription from RNA polymerase II promoter [GO:0000122]; neuron differentiation [GO:0030182]; nucleus [GO:0005634]; positive regulation of transcription from RNA polymerase II promoter [GO:0045944]; sequence-specific DNA binding [GO:0043565]	AT rich interactive domain protein [meNOG03253]; DNA-binding proteins Bright/BRCAA1\/RBP1 and related proteins containing BRIGHT domain [KOG2744]		NCoils: 0.04 (21/467)	SEG: 0.08 (39/467)	0.01	0.02	0.01	0.04	0.04	0.04	0.04	0.04	0.02	0.03	7.45	1.82	6.2	7.45	5.41
WBGene00000477	C18C4.2	cft-1	0.01	0.01	1	0.01	0.01	0.01	0.01	0.01	0.01	0.01	0.01	1	1	1	1	1	1	1	1	1	protein	1247 aa	1247				ABC_membrane [PF00664.22]; ABC_tran [PF00005.26]	ATP binding [GO:0005524]; ATPase activity [GO:0016887]; ATPase activity, coupled to transmembrane movement of substances [GO:0042626]; integral component of membrane [GO:0016021]; transmembrane transport [GO:0055085]; transport [GO:0006810]	ABC-type multidrug transport system, ATPase and permease components [COG1132]; Atp-Binding cassette, sub-family C (CFTR/MRP), member protein [meNOG05102]; Multidrug resistance-associated protein\/mitoxantrone resistance protein, ABC superfamily [KOG0054]	TM(12x)		SEG: 0.03 (39/1247)	0	0.01	0	0.01	0.01	0.01	0.01	0.01	0.01	0.01	1.52	0.77	1.3	1.51	1.52
WBGene00000478	F27E11.3	cfz-2	0.04	0.03	1	0.02	0.03	0.02	0.04	0.01	0.02	0.01	0.03	0.4	0.6	0.4	1	0.4	0.6	0.4	1.67	1.67	protein	550-578 aa	578				Frizzled [PF01534.16]; Fz [PF01392.21]	cell surface receptor signaling pathway [GO:0007166]; membrane [GO:0016020]; protein binding [GO:0005515]	Receptor for Wnt proteins. Most of frizzled receptors are coupled to the beta-catenin canonical signaling pathway, which leads to the activation of disheveled proteins, inhibition of GSK- 3 kinase, nuclear accumulation of beta-catenin and activation of Wnt target genes. A second signaling pathway involving PKC and calcium fluxes has been seen for some family members, but it is not yet clear if it…	SigP+TM(7x)		SEG: 0.04 (21/578)	0.02	0.03	0.02	0.05	0.05	0.05	0.05	0.05	0.03	0.05	1.16	1.75	0.85	1.01	1.16
WBGene00000479	C07H6.5	cgh-1	0.08	0.01	0.04	0.08	0.01	0.04	0	0.01	0	0.01	0	0.04	0	0.02	0	1.83	0.08	0.55	0.03	1.83	protein	430 aa	430	Housekeeping			DEAD [PF00270.28]; Helicase_C [PF00271.30]	ATP binding [GO:0005524]; P granule [GO:0043186]; RNA helicase activity [GO:0003724]; apoptotic process [GO:0006915]; cell death [GO:0008219]; cytoplasmic mRNA processing body [GO:0000932]; cytoplasmic stress granule [GO:0010494]; embryo development ending in birth or egg hatching [GO:0009792]; gamete generation [GO:0007276]; gene expression [GO:0010467]; germline cell cycle switching, mitotic to…	ATP-dependent RNA helicase [KOG0326]; DEAD (Asp-Glu-Ala-Asp) box polypeptide 6 [meNOG02157]; Superfamily II DNA and RNA helicases [COG0513]				11.39	0.94	6.21	0.34	11.39	6.21	11.39	11.39	11.39	271.98	145.21	1164.8	101.14	119.71	145.21
WBGene00000480	Y38C9A.2	cgp-1	0	0	0.02	0	0	0	0	0	0	0	0	0.02	0	0	0.01	2.25	0.22	0.22	0.44	2.25	protein	613 aa	613				GTP_EFTU [PF00009.26]; GTP_EFTU_D2 [PF03144.24]	GTP binding [GO:0005525]; GTPase activity [GO:0003924]	GTP binding protein [meNOG00142]; GTP-binding protein GP-1 [KOG0463]; GTPase [COG5258]		NCoils: 0.03 (21/613)	SEG: 0.05 (32/613)	0.09	0.02	0.02	0.04	0.09	0.04	0.09	0.09	0.09	4.75	18.54	75.99	18.54	16.88	17.81
WBGene00000481	ZC416.8	cha-1	0.01	0.02	1	0	0	0	0.01	0.01	0.01	0.01	0.02	0.5	0.5	0.5	1	0.5	0.5	0.5	2	2	protein	627 aa	627				Carn_acyltransf [PF00755.19]	acetylcholine biosynthetic process [GO:0008292]; choline O-acetyltransferase activity [GO:0004102]; cytosol [GO:0005829]; excitatory synapse [GO:0060076]; locomotion [GO:0040011]; neuron projection [GO:0043005]; neuronal cell body [GO:0043025]; organelle membrane [GO:0031090]; oviposition [GO:0018991]; plasma membrane [GO:0005886]; synapse [GO:0045202]; transferase activity, transferring acyl gro…	Acetyltransferase [meNOG06695]; Carnitine O-acyltransferase CRAT [KOG3717]		NCoils: 0.03 (21/627)	SEG: 0.02 (15/627)	0.01	0.01	0.01	0.02	0.02	0.02	0.02	0.02	0.01	0.02	2.86	0.98	2.68	2.86	2.56
WBGene00000482	T14G8.1	chd-3	0.01	0	0	0.01	0	0	0	0	0	0	0	0	0	0	0	3	0.33	0.33	0.33	3	protein	1787 aa	1787	Housekeeping	TF[Gupta]		CHDCT2 [PF08074.10]; CHDNT [PF08073.11]; Chromo [PF00385.23]; DUF1086 [PF06461.10]; DUF1087 [PF06465.12]; Helicase_C [PF00271.30]; PHD [PF00628.28]; ResIII [PF04851.14]; SNF2_N [PF00176.22]	ATP binding [GO:0005524]; DNA binding [GO:0003677]; DNA helicase activity [GO:0003678]; cell fate determination [GO:0001709]; chromatin binding [GO:0003682]; chromatin remodeling [GO:0006338]; histone deacetylase complex [GO:0000118]; hydrolase activity, acting on acid anhydrides, in phosphorus-containing anhydrides [GO:0016818]; negative regulation of Ras protein signal transduction [GO:0046580]…	Chromodomain helicase DNA binding protein [meNOG05305]; Predicted helicase [KOG0383]; Superfamily II DNA/RNA helicases, SNF2 family [COG0553]		NCoils: 0.01 (25/1787)	SEG: 0.11 (190/1787)	0.03	0	0	0.01	0.03	0.01	0.03	0.03	0.03	6.42	4.69	11.4	4.16	4.69	4.47
WBGene00000483	C55B7.12	che-1	0.56	0.6	1.2	0.19	0.34	0.22	0.56	0.2	0.37	0.23	0.6	0.4	0.73	0.47	1.2	0.33	0.61	0.39	1.64	1.64	protein	214-273 aa	273		TF[Gupta+Thomas+Walhout]		GAGA [PF09237.10]; zf-C2H2 [PF00096.25]; zf-C2H2_4 [PF13894.5]; zf-C2H2_6 [PF13912.5]; zf-C2H2_jaz [PF12171.7]; zf-Di19 [PF05605.11]; zf-H2C2_2 [PF13465.5]	embryo development ending in birth or egg hatching [GO:0009792]; neuron differentiation [GO:0030182]; nucleic acid binding [GO:0003676]; nucleus [GO:0005634]; positive regulation of transcription from RNA polymerase II promoter [GO:0045944]; regulation of chemotaxis [GO:0050920]; sequence-specific DNA binding [GO:0043565]	FOG: Zn-finger [COG5048]; FOG: Zn-finger [KOG1721]; Protein involved in compound eye photoreceptor cell differentiation [meNOG15568]			SEG: 0.06 (13/214)	0.06	0.11	0.07	0.18	0.18	0.18	0.18	0.18	0.11	0.15	0.32	0.3	0.23	0.11	0.32
WBGene00000484	F38G1.1	che-2	0.05	0.24	0.24	0.01	0.03	0.03	0.05	0.06	0.12	0.12	0.24	0.06	0.12	0.12	0.24	0.25	0.5	0.5	2	2	protein	760 aa	760				ANAPC4_WD40 [PF12894.6]; WD40 [PF00400.31]	chemotaxis [GO:0006935]; cilium assembly [GO:0042384]; dauer entry [GO:0043053]; dauer larval development [GO:0040024]; negative regulation of transforming growth factor beta receptor signaling pathway [GO:0030512]; nonmotile primary cilium [GO:0031513]; positive regulation of multicellular organism growth [GO:0040018]; protein binding [GO:0005515]; structural molecule activity [GO:0005198]	FOG: WD40 repeat [COG2319]; Intraflagellar transport 80 homolog (Chlamydomonas) protein [meNOG00459]; WD40 repeat-containing protein CHE-2 [KOG1524]	TM(1x)			0.01	0.02	0.02	0.04	0.04	0.04	0.04	0.04	0.02	0.17	0.75	0.17	0.55	0.62	0.75
WBGene00000485	F18C12.1	che-3	0.02	0.06	1	0.02	0.02	0.02	0.02	0.06	0.06	0.06	0.06	1	1	1	1	1	1	1	1	1	protein	4171 aa	4171				AAA [PF00004.28]; AAA_16 [PF13191.5]; AAA_5 [PF07728.13]; AAA_6 [PF12774.6]; AAA_7 [PF12775.6]; AAA_8 [PF12780.6]; AAA_9 [PF12781.6]; DHC_N1 [PF08385.11]; DHC_N2 [PF08393.12]; Dynein_heavy [PF03028.14]; MT [PF12777.6]	ATP binding [GO:0005524]; ATPase activity [GO:0016887]; chemosensory behavior [GO:0007635]; cilium [GO:0005929]; cilium assembly [GO:0042384]; cilium or flagellum-dependent cell motility [GO:0001539]; dauer entry [GO:0043053]; dynein complex [GO:0030286]; microtubule motor activity [GO:0003777]; microtubule-based movement [GO:0007018]; negative regulation of transforming growth factor beta recept…	Dynein, cytoplasmic 2, heavy chain 1 protein [meNOG03949]; Dynein, heavy chain [COG5245]; Dyneins, heavy chain [KOG3595]		NCoils: 0.06 (255/4171)	SEG: 0.05 (216/4171)	0	0	0	0	0	0	0	0	0	0	0.57	0.18	0.5	0.46	0.57
WBGene00000487	C23H5.7	che-6	0.1	0.15	1	0.05	0.05	0.05	0.1	0.08	0.08	0.08	0.15	0.5	0.5	0.5	1	0.5	0.5	0.5	2	2	protein	628 aa	628				cNMP_binding [PF00027.28]	neuronal cell body [GO:0043025]		TM(5x)		SEG: 0.03 (16/628)	0.01	0.01	0.01	0.02	0.02	0.02	0.02	0.02	0.01	0.02	0.21	0.13	0.1	0.2	0.21
WBGene00000488	F26D11.10	che-7	0.02	0.04	0.03	0.01	0.01	0.01	0.02	0.02	0.02	0.02	0.04	0.02	0.02	0.02	0.03	0.5	0.5	0.5	2	2	protein	554 aa	554				Innexin [PF00876.17]	gap junction [GO:0005921]; lipid storage [GO:0019915]; positive regulation of multicellular organism growth [GO:0040018]	Innexin-type channels [TWOG0193]	TM(5x)		SEG: 0.07 (37/554)	0.01	0.01	0.01	0.02	0.02	0.02	0.02	0.02	0.01	0.66	0.9	0.51	0.9	0.84	0.72
WBGene00000490	C27A7.4	che-11	0.01	0.04	0.5	0.01	0.01	0.01	0.01	0.04	0.04	0.04	0.04	0.5	0.5	0.5	0.5	1	1	1	1	1	protein	1437 aa	1437					dauer entry [GO:0043053]; determination of adult lifespan [GO:0008340]; hyperosmotic response [GO:0006972]; intraciliary transport [GO:0042073]; intraciliary transport particle A [GO:0030991]; nonmotile primary cilium [GO:0031513]; protein binding [GO:0005515]; response to heat [GO:0009408]; response to oxidative stress [GO:0006979]	Intraflagellar transport 140 homolog (Chlamydomonas) protein [meNOG04514]; WD40 and TPR repeat-containing protein [KOG3617]		NCoils: 0.03 (49/1437)	SEG: 0.01 (16/1437)	0	0.01	0	0.01	0.01	0.01	0.01	0.01	0.01	0.02	0.73	0.23	0.73	0.5	0.72
WBGene00000491	B0024.8	che-12	0.05	0.18	0.07	0.02	0.03	0.03	0.05	0.07	0.11	0.09	0.18	0.02	0.04	0.03	0.07	0.38	0.62	0.5	1.6	1.6	protein	599-1282 aa	1282				CLASP_N [PF12348.7]	binding [GO:0005488]; chemotaxis [GO:0006935]; dauer entry [GO:0043053]; hyperosmotic response [GO:0006972]; nonmotile primary cilium assembly [GO:0035058]	Family with sequence similarity 179, member protein [meNOG10074]; Uncharacterized conserved protein [KOG2933]		NCoils: 0.02 (21/1282); 0.03 (21/690); 0.03 (21/601); 0.04 (21/599)	SEG: 0.04 (45/1282)	0.03	0.05	0.04	0.08	0.08	0.08	0.08	0.08	0.05	1.23	1.51	0.45	1.25	1.5	1.51
WBGene00000492	F59C6.7	che-13	0.04	0.19	0.17	0.01	0.02	0.02	0.04	0.06	0.1	0.08	0.19	0.06	0.09	0.07	0.17	0.33	0.56	0.44	1.8	1.8	protein	325-412 aa	412				IFT57 [PF10498.8]	axoneme [GO:0005930]; chemosensory behavior [GO:0007635]; ciliary transition zone [GO:0035869]; cilium assembly [GO:0042384]; dauer entry [GO:0043053]; protein localization [GO:0008104]; structural molecule activity [GO:0005198]	Huntingtin interacting protein 1 (Hip1) interactor Hippi [KOG0972]; Intraflagellar transport 57 homolog protein [meNOG08291]		NCoils: 0.12 (49/412); 0.15 (49/325)	SEG: 0.09 (36/412)	0.03	0.05	0.04	0.09	0.09	0.09	0.09	0.09	0.05	0.54	2.39	0.48	2.01	2.39	1.91
WBGene00000493	F56H1.1	che-14	0.03	0.02	0.5	0.03	0.03	0.03	0.03	0.02	0.02	0.02	0.02	0.5	0.5	0.5	0.5	1	1	1	1	1	protein	917 aa	917				Sterol-sensing [PF12349.7]	apical plasma membrane [GO:0016324]; dauer entry [GO:0043053]	Dispatched homolog protein [meNOG00111]; Predicted patched transmembrane receptor [KOG3664]	TM(13x)		SEG: 0.05 (48/917)	0.01	0.01	0.01	0.01	0.01	0.01	0.01	0.01	0.01	0.02	0.39	0.61	0.37	0.29	0.39
WBGene00000496	T25G3.2	chs-1	0	0	0.01	0	0	0	0	0	0	0	0	0	0	0	0.01	0.5	0.5	0.5	2	2	protein	1322 aa	1322				Chitin_synth_2 [PF03142.14]; Glyco_tranf_2_3 [PF13641.5]; Glyco_trans_2_3 [PF13632.5]	apoptotic process [GO:0006915]; cell cortex [GO:0005938]; chitin synthase activity [GO:0004100]; eggshell formation [GO:0030703]; embryo development ending in birth or egg hatching [GO:0009792]; plasma membrane [GO:0005886]; reproduction [GO:0000003]; transferase activity, transferring hexosyl groups [GO:0016758]	Chitin synthase/hyaluronan synthase (glycosyltransferases) [KOG2571]; Glycosyltransferases, probably involved in cell wall biogenesis [COG1215]; Hyaluronan synthase [meNOG00011]	TM(15x)	NCoils: 0.04 (49/1322)	SEG: 0.02 (30/1322)	0.01	0.01	0.01	0.02	0.02	0.02	0.02	0.02	0.01	2.54	5.81	168.42	4.2	4.05	5.81
WBGene00000497	F48A11.1	chs-2	0.01	0.01	0.5	0.01	0.01	0.01	0.01	0.01	0.01	0.01	0.01	0.5	0.5	0.5	0.5	1	1	1	1	1	protein	1668 aa	1668				Chitin_synth_2 [PF03142.14]; CitMHS [PF03600.15]; Glyco_tranf_2_3 [PF13641.5]; Glyco_trans_2_3 [PF13632.5]	body morphogenesis [GO:0010171]; chitin synthase activity [GO:0004100]; embryo development ending in birth or egg hatching [GO:0009792]; growth [GO:0040007]; locomotion [GO:0040011]; nematode larval development [GO:0002119]; reproduction [GO:0000003]; transferase activity, transferring hexosyl groups [GO:0016758]	Chitin synthase [meNOG01381]; Chitin synthase/hyaluronan synthase (glycosyltransferases) [KOG2571]; Glycosyltransferases, probably involved in cell wall biogenesis [COG1215]	TM(18x)		SEG: 0.07 (125/1668)	0	0	0	0.01	0.01	0.01	0.01	0.01	0	0.02	1.81	0.9	1.71	1.55	1.81
WBGene00000498	Y39H10A.7	chk-1	0.01	0	0.01	0	0	0	0.01	0	0	0	0	0	0	0	0.01	0.36	0.55	0.45	1.83	1.83	protein	411-503 aa	503				Pkinase [PF00069.24]; Pkinase_Tyr [PF07714.16]	ATP binding [GO:0005524]; apoptotic process [GO:0006915]; body morphogenesis [GO:0010171]; cell cycle [GO:0007049]; embryo development ending in birth or egg hatching [GO:0009792]; nematode larval development [GO:0002119]; protein kinase activity [GO:0004672]; protein phosphorylation [GO:0006468]; reproduction [GO:0000003]; transferase activity, transferring phosphorus-containing groups [GO:00167…	Checkpoint kinase and related serine/threonine protein kinases [KOG0590]; Protein serine\/threonine kinase [meNOG00977]; Serine\/threonine protein kinase [COG0515]			SEG: 0.07 (33/503)	0.04	0.06	0.05	0.11	0.11	0.11	0.11	0.11	0.06	18.94	17.75	68.5	17.75	12.33	14.5
WBGene00000499	Y60A3A.12	chk-2	0.01	0	1	0	0	0	0.01	0	0	0	0	0.33	0.67	0.33	1	0.33	0.67	0.33	1.5	1.5	protein	476 aa	476				FHA [PF00498.25]; Kinase-like [PF14531.5]; Pkinase [PF00069.24]; Pkinase_Tyr [PF07714.16]	ATP binding [GO:0005524]; embryo development ending in birth or egg hatching [GO:0009792]; meiotic chromosome segregation [GO:0045132]; meiotic nuclear division [GO:0007126]; protein binding [GO:0005515]; protein kinase activity [GO:0004672]; protein phosphorylation [GO:0006468]; reproduction [GO:0000003]; transferase activity, transferring phosphorus-containing groups [GO:0016772]	CHK2 checkpoint homolog (S. pombe) protein [meNOG12266]; Serine/threonine protein kinase Chk2 and related proteins [KOG0615]; Serine\/threonine protein kinase [COG0515]	TM(1x)		SEG: 0.06 (28/476)	0.01	0.02	0.01	0.03	0.03	0.03	0.03	0.03	0.02	0.03	5.34	7.74	5.34	4.09	4.62
WBGene00000500	T09B4.10	chn-1	0.01	0	0	0.01	0	0	0	0	0	0	0	0	0	0	0	1.78	0.38	0.25	0.56	1.78	protein	266 aa	266	Housekeeping			TPR_1 [PF00515.27]; TPR_11 [PF13414.5]; TPR_12 [PF13424.5]; TPR_2 [PF07719.16]; TPR_8 [PF13181.5]; U-box [PF04564.14]	Hsp70 protein binding [GO:0030544]; chaperone binding [GO:0051087]; cytoplasm [GO:0005737]; locomotion [GO:0040011]; nematode larval development [GO:0002119]; oviposition [GO:0018991]; protein autoubiquitination [GO:0051865]; protein binding [GO:0005515]; protein polyubiquitination [GO:0000209]; protein ubiquitination [GO:0016567]; sarcomere organization [GO:0045214]; ubiquitin protein ligase bin…	Chaperone-dependent E3 ubiquitin protein ligase (contains TPR repeats) [KOG4642]; STIP1 homology and U-Box containing protein 1 [meNOG05228]				0.16	0.06	0.04	0.09	0.16	0.09	0.16	0.16	0.16	36.45	25.79	74.54	25.14	22.95	25.79
WBGene00000501	C48D1.3	cho-1	0	0.02	0.05	0	0	0	0	0.01	0.01	0.01	0.02	0.02	0.02	0.02	0.05	0.5	0.5	0.5	2	2	protein	576 aa	576				SSF [PF00474.16]	axon [GO:0030424]; choline transmembrane transporter activity [GO:0015220]; choline transport [GO:0015871]; membrane [GO:0016020]; neuron projection [GO:0043005]; neuronal cell body [GO:0043025]; synapse [GO:0045202]; synaptic vesicle [GO:0008021]; transmembrane transport [GO:0055085]; transport [GO:0006810]; transporter activity [GO:0005215]	Choline transporter [KOG3761]; Choline transporter protein [meNOG09996]; Na+/proline symporter [COG0591]	TM(13x)		SEG: 0.05 (30/576)	0.01	0.01	0.01	0.02	0.02	0.02	0.02	0.02	0.01	0.4	4.74	1.03	3.44	4.74	4.65
WBGene00000502	Y110A7A.13	chp-1	0	0	0	0	0	0	0	0	0	0	0	0	0	0	0	0.25	0.75	0.5	1.33	1.33	protein	321 aa	321				CHORD [PF04968.11]; CS [PF04969.15]	embryo development ending in birth or egg hatching [GO:0009792]; gonad development [GO:0008406]; hermaphrodite genitalia development [GO:0040035]; negative regulation of vulval development [GO:0040027]; nematode larval development [GO:0002119]; receptor-mediated endocytosis [GO:0006898]; reproduction [GO:0000003]; striated muscle myosin thick filament assembly [GO:0071688]	Cysteine and histidine-rich domain (CHORD)-containing protein [meNOG02236]; Zn2+-binding protein Melusin/RAR1, contains CHORD domain [KOG1667]				0.01	0.03	0.02	0.04	0.04	0.04	0.04	0.04	0.03	17.58	52.31	74.58	52.31	40.1	42.33
WBGene00000503	C04F6.3	cht-1	0.01	0	0.03	0	0.01	0	0.01	0	0	0	0	0.01	0.03	0.01	0.02	0.33	1.5	0.33	0.67	1.5	protein	617 aa	617				CBM_14 [PF01607.23]; Glyco_hydro_18 [PF00704.27]	carbohydrate metabolic process [GO:0005975]; chitin binding [GO:0008061]; chitin catabolic process [GO:0006032]; chitin metabolic process [GO:0006030]; chitinase activity [GO:0004568]; embryo development ending in birth or egg hatching [GO:0009792]; extracellular region [GO:0005576]; hydrolase activity, hydrolyzing O-glycosyl compounds [GO:0004553]; response to fungus [GO:0009620]	Chitinase [COG3325]; Chitinase [KOG2806]; Chitinase [meNOG08905]	SigP		SEG: 0.13 (79/617)	0.01	0.03	0.01	0.02	0.03	0.03	0.02	0.03	0.03	0.96	2.22	23.57	0.57	0.2	2.22
WBGene00000506	H14E04.5	cic-1	0	0	0.01	0	0	0	0	0	0	0	0	0	0	0	0.01	0.6	0.6	0.4	1.67	1.67	protein	302 aa	302				Cyclin_N [PF00134.22]	DNA-directed RNA polymerase II, holoenzyme [GO:0016591]; protein kinase binding [GO:0019901]; regulation of cell cycle [GO:0051726]; regulation of cyclin-dependent protein serine/threonine kinase activity [GO:0000079]; regulation of transcription, DNA-templated [GO:0006355]	CDK8 kinase-activating protein cyclin C [KOG0794]; Cdk activating kinase (CAK)/RNA polymerase II transcription initiation\/nucleotide excision repair factor TFIIH\/TFIIK, cyclin H subunit [COG5333]; Component of the Mediator complex, a coactivator involved in regulated gene transcription of nearly all RNA polymerase II-dependent genes. Mediator functions as a bridge to convey information from gen…			SEG: 0.04 (13/302)	0.03	0.03	0.02	0.05	0.05	0.05	0.05	0.05	0.03	9.56	10.83	30.34	8.97	8.6	10.83
WBGene00000507	F44B9.4	cit-1.1	0.01	0	0.04	0	0.01	0	0.01	0	0	0	0	0.01	0.02	0.02	0.04	0.36	0.57	0.43	1.75	1.75	protein	183-468 aa	468				Cyclin_N [PF00134.22]	protein kinase binding [GO:0019901]; regulation of cyclin-dependent protein serine/threonine kinase activity [GO:0000079]; regulation of transcription, DNA-templated [GO:0006355]	CDK9 kinase-activating protein cyclin T [KOG0834]; Cdk activating kinase (CAK)/RNA polymerase II transcription initiation\/nucleotide excision repair factor TFIIH\/TFIIK, cyclin H subunit [COG5333]; Snrna binding protein [meNOG01023]		NCoils: 0.04 (21/468); 0.05 (21/438); 0.11 (21/183)	SEG: 0.19 (35/183)	0.05	0.08	0.06	0.14	0.14	0.14	0.14	0.14	0.08	3.65	12.93	37.41	12.93	11.58	12.01
WBGene00000508	F44B9.3	cit-1.2	0	0	0.08	0	0	0	0	0	0	0	0	0.03	0.05	0.03	0.08	0.4	0.6	0.4	1.67	1.67	protein	381-555 aa	555				Cyclin_N [PF00134.22]	determination of adult lifespan [GO:0008340]; protein kinase binding [GO:0019901]; regulation of cyclin-dependent protein serine/threonine kinase activity [GO:0000079]; regulation of transcription, DNA-templated [GO:0006355]	CDK9 kinase-activating protein cyclin T [KOG0834]; Cdk activating kinase (CAK)/RNA polymerase II transcription initiation\/nucleotide excision repair factor TFIIH\/TFIIK, cyclin H subunit [COG5333]; Snrna binding protein [meNOG01023]			SEG: 0.21 (80/381)	0.02	0.03	0.02	0.05	0.05	0.05	0.05	0.05	0.03	0.61	15.59	22.78	11.4	13.54	15.59
WBGene00000509	C28D4.2	cka-1	0.01	0	0.87	0	0	0	0.01	0	0	0	0	0.13	0.22	0.22	0.87	0.15	0.25	0.25	4	4	protein	448-474 aa	474				APH [PF01636.22]; Choline_kinase [PF01633.19]	CDP-choline pathway [GO:0006657]; cell cortex [GO:0005938]; choline kinase activity [GO:0004103]; cytoplasm [GO:0005737]; transferase activity, transferring phosphorus-containing groups [GO:0016772]	Choline kinase [KOG2686]; Choline kinase [meNOG07006]; Predicted choline kinase involved in LPS biosynthesis [COG0510]				0.03	0.05	0.05	0.2	0.2	0.2	0.2	0.2	0.05	0.23	21.16	42.32	17.87	21.16	19.67
WBGene00000510	C52B9.1	cka-2	0	0.02	0.04	0	0	0	0	0.01	0.01	0.01	0.02	0.01	0.03	0.02	0.04	0.33	0.67	0.5	1.5	1.5	protein	408-429 aa	429				APH [PF01636.22]; Choline_kinase [PF01633.19]	CDP-choline pathway [GO:0006657]; choline kinase activity [GO:0004103]; transferase activity, transferring phosphorus-containing groups [GO:0016772]	Choline kinase [KOG2686]; Choline kinase [meNOG07006]; Predicted choline kinase involved in LPS biosynthesis [COG0510]				0.02	0.04	0.03	0.06	0.06	0.06	0.06	0.06	0.04	1.55	12.65	3.76	11.59	12.65	10.9
WBGene00000511	B0285.8	ckb-1	0.01	0.01	0.12	0	0	0	0.01	0	0.01	0.01	0.01	0.03	0.06	0.06	0.12	0.25	0.5	0.5	2	2	protein	371 aa	371				APH [PF01636.22]; Choline_kinase [PF01633.19]	lipid storage [GO:0019915]; transferase activity, transferring phosphorus-containing groups [GO:0016772]	Choline kinase [KOG2686]; Choline kinase [meNOG07006]; Predicted choline kinase involved in LPS biosynthesis [COG0510]	TM(1x)		SEG: 0.03 (10/371)	0.01	0.02	0.02	0.04	0.04	0.04	0.04	0.04	0.02	0.32	6.36	3.3	6.36	4.95	6.31
WBGene00000512	B0285.9	ckb-2	0	0	0.01	0	0	0	0	0	0	0	0	0	0.01	0.01	0.01	0.25	0.5	0.5	2	2	protein	369 aa	369				APH [PF01636.22]; Choline_kinase [PF01633.19]	CDP-choline pathway [GO:0006657]; choline kinase activity [GO:0004103]; endoplasmic reticulum unfolded protein response [GO:0030968]; transferase activity, transferring phosphorus-containing groups [GO:0016772]	Choline kinase [KOG2686]; Choline kinase [meNOG07006]; Predicted choline kinase involved in LPS biosynthesis [COG0510]				0.01	0.02	0.02	0.04	0.04	0.04	0.04	0.04	0.02	3.24	34.7	20.06	21.08	15.96	34.7
WBGene00000513	B0285.10	ckb-3	0.23	0.2	1.25	0.09	0.14	0.09	0.23	0.08	0.12	0.08	0.2	0.5	0.75	0.5	1.25	0.4	0.6	0.4	1.67	1.67	protein	368 aa	368				APH [PF01636.22]; Choline_kinase [PF01633.19]	transferase activity, transferring phosphorus-containing groups [GO:0016772]	Choline kinase [KOG2686]; Choline kinase [meNOG07006]; Predicted choline kinase involved in LPS biosynthesis [COG0510]	TM(1x)			0.02	0.03	0.02	0.05	0.05	0.05	0.05	0.05	0.03	0.04	0.22	0.25	0.11	0.13	0.22
WBGene00000514	F22F7.5	ckb-4	0	0.01	0.29	0	0	0	0	0	0	0	0.01	0.07	0.14	0.14	0.29	0.25	0.5	0.5	2	2	protein	381 aa	381				APH [PF01636.22]; Choline_kinase [PF01633.19]	CDP-choline pathway [GO:0006657]; choline kinase activity [GO:0004103]; transferase activity, transferring phosphorus-containing groups [GO:0016772]	Choline kinase [KOG2686]; Choline kinase [meNOG07006]; Predicted choline kinase involved in LPS biosynthesis [COG0510]				0.01	0.02	0.02	0.04	0.04	0.04	0.04	0.04	0.02	0.14	8.93	6.73	6.5	6.81	8.93
WBGene00000515	T27A10.3	ckc-1	0	0	0.06	0	0	0	0	0	0	0	0	0.02	0.04	0.02	0.06	0.38	0.62	0.38	1.6	1.6	protein	326-342 aa	342				APH [PF01636.22]; Choline_kinase [PF01633.19]	transferase activity, transferring phosphorus-containing groups [GO:0016772]	Ethanolamine kinase [KOG4720]; Ethanolamine kinase [meNOG03601]; Predicted choline kinase involved in LPS biosynthesis [COG0510]				0.03	0.05	0.03	0.08	0.08	0.08	0.08	0.08	0.05	1.28	22.15	24.25	20.4	22.15	21.11
WBGene00000516	T05A6.1	cki-1	0.01	0.02	0.02	0	0.01	0	0.01	0.01	0.01	0.01	0.02	0.01	0.01	0.01	0.02	0.38	0.62	0.38	1.6	1.6	protein	184 aa	184				CDI [PF02234.18]	body morphogenesis [GO:0010171]; cell cycle [GO:0007049]; cell cycle arrest [GO:0007050]; cell division [GO:0051301]; cyclin-dependent protein serine/threonine kinase inhibitor activity [GO:0004861]; embryo development [GO:0009790]; embryo development ending in birth or egg hatching [GO:0009792]; germline cell cycle switching, mitotic to meiotic cell cycle [GO:0051729]; gonad development [GO:0008…	Cyclin-Dependent kinase inhibitor [meNOG22125]; Cyclin-dependent kinase inhibitor [KOG4743]			SEG: 0.20 (37/184)	0.03	0.05	0.03	0.08	0.08	0.08	0.08	0.08	0.05	3.43	7.08	4.84	6.04	7.08	6.69
WBGene00000517	T05A6.2	cki-2	0.01	0	0.45	0	0	0	0.01	0	0	0	0	0.16	0.27	0.18	0.45	0.36	0.59	0.41	1.69	1.69	protein	175-259 aa	259				CDI [PF02234.18]	cell cycle arrest [GO:0007050]; cyclin-dependent protein serine/threonine kinase inhibitor activity [GO:0004861]; embryo development ending in birth or egg hatching [GO:0009792]; mitotic nuclear division [GO:0007067]; negative regulation of vulval development [GO:0040027]; nucleus [GO:0005634]	Cyclin-dependent kinase inhibitor [KOG4743]			SEG: 0.09 (24/259)	0.08	0.13	0.09	0.22	0.22	0.22	0.22	0.22	0.13	0.49	32.22	46.49	30.29	30.25	32.22
WBGene00000518	C05H8.1	ckk-1	0.01	0.03	1	0	0.01	0	0.01	0.01	0.02	0.01	0.03	0.4	0.6	0.4	1	0.4	0.6	0.4	1.67	1.67	protein	432-541 aa	541				Pkinase [PF00069.24]; Pkinase_Tyr [PF07714.16]	ATP binding [GO:0005524]; calcium-mediated signaling [GO:0019722]; calmodulin binding [GO:0005516]; calmodulin-dependent protein kinase activity [GO:0004683]; cytoplasm [GO:0005737]; nucleus [GO:0005634]; positive regulation of CREB transcription factor activity [GO:0032793]; positive regulation of protein kinase activity [GO:0045860]; protein kinase activity [GO:0004672]; protein phosphorylation…	Ca2+/calmodulin-dependent protein kinase kinase beta and related serine\/threonine protein kinases [KOG0585]; Calcium\/Calmodulin-Dependent protein kinase kinase [meNOG05600]; Serine\/threonine protein kinase [COG0515]	TM(1x)		SEG: 0.08 (45/541)	0.02	0.03	0.02	0.05	0.05	0.05	0.05	0.05	0.03	0.05	4.31	1.73	4	3.76	4.31
WBGene00000519	Y47D3A.4	cku-70	0	0	0	0	0	0	0	0	0	0	0	0	0	0	0	0.5	0.5	0.5	2	2	protein	679 aa	679				Ku [PF02735.15]; Ku_C [PF03730.13]; Ku_N [PF03731.14]	ATP-dependent DNA helicase activity [GO:0004003]; DNA binding [GO:0003677]; DNA repair [GO:0006281]; Ku70:Ku80 complex [GO:0043564]; damaged DNA binding [GO:0003684]; determination of adult lifespan [GO:0008340]; double-strand break repair via nonhomologous end joining [GO:0006303]; nucleus [GO:0005634]; response to stress [GO:0006950]; telomere maintenance [GO:0000723]; telomeric DNA binding [GO…	DNA-binding subunit of a DNA-dependent protein kinase (Ku70 autoantigen) [KOG2327]; X-Ray repair complementing defective repair in Chinese hamster cells 6 protein [meNOG01346]			SEG: 0.04 (24/679)	0.01	0.01	0.01	0.02	0.02	0.02	0.02	0.02	0.01	5.34	13.66	38.68	13.66	11.8	12.65
WBGene00000520	R07E5.8	cku-80	0.04	0.01	0.02	0.04	0	0	0	0.01	0	0	0	0.02	0	0	0	10	0.05	0.05	0.1	10	protein	728 aa	728				Ku [PF02735.15]; Ku_PK_bind [PF08785.10]	ATP-dependent DNA helicase activity [GO:0004003]; DNA binding [GO:0003677]; DNA recombination [GO:0006310]; DNA repair [GO:0006281]; Ku70:Ku80 complex [GO:0043564]; damaged DNA binding [GO:0003684]; double-strand break repair via nonhomologous end joining [GO:0006303]; growth [GO:0040007]; hydrolase activity, acting on acid anhydrides [GO:0016817]; nucleus [GO:0005634]; response to stress [GO:000…	DNA-binding subunit of a DNA-dependent protein kinase (Ku80 autoantigen) [KOG2326]; X-Ray repair complementing defective repair in Chinese hamster cells 5 protein [meNOG08741]			SEG: 0.04 (30/728)	0.4	0.02	0.02	0.04	0.4	0.04	0.4	0.4	0.4	16.34	10.42	34.34	8.33	7.11	10.42
WBGene00000521	C15C8.2	cky-1	0.21	0.33	1	0.05	0.16	0.11	0.21	0.08	0.25	0.17	0.33	0.25	0.75	0.5	1	0.25	0.75	0.5	1.33	1.33	protein	636-676 aa	676		TF[Gupta+Thomas+Walhout]		PAS [PF00989.24]; PAS_11 [PF14598.5]; PAS_3 [PF08447.11]	nucleus [GO:0005634]; positive regulation of transcription from RNA polymerase II promoter [GO:0045944]; protein binding [GO:0005515]; protein dimerization activity [GO:0046983]; signal transducer activity [GO:0004871]; signal transduction [GO:0007165]	Hypoxia-inducible factor 1/Neuronal PAS domain protein NPAS1 [KOG3558]; Neuronal PAS domain protein 4 [meNOG10515]; Predicted transcription factor [TWOG0030]			SEG: 0.22 (148/676)	0.01	0.03	0.02	0.04	0.04	0.04	0.04	0.04	0.03	0.04	0.19	0.12	0.19	0.06	0.17
WBGene00000522	C09F12.1	clc-1	0.11	0.29	0.11	0.01	0.05	0	0.11	0.03	0.13	0	0.29	0.01	0.05	0	0.11	0.1	0.44	0.01	2.28	2.28	protein	182 aa	182				Claudin_3 [PF06653.10]	cell-cell junction [GO:0005911]; defense response to Gram-positive bacterium [GO:0050830]; epithelial cell-cell adhesion [GO:0090136]; innate immune response [GO:0045087]; molting cycle, collagen and cuticulin-based cuticle [GO:0018996]	Unnamed protein [LSE0920]	TM(4x)			0.78	3.48	0.08	7.92	7.92	7.92	7.92	7.92	3.48	69.06	72.63	27.16	57.32	50.5	72.63
WBGene00000523	C01C10.1	clc-2	0.02	0.02	0.16	0.01	0.01	0.01	0.02	0.01	0.01	0.01	0.02	0.05	0.11	0.08	0.16	0.33	0.67	0.5	1.5	1.5	protein	252 aa	252				Clc-like [PF07062.11]	epithelial cell-cell adhesion [GO:0090136]; integral component of membrane [GO:0016021]; plasma membrane [GO:0005886]	Protein involved in septate junction assembly [euNOG07704]; Unnamed protein [LSE0688]	SigP+TM(3x)		SEG: 0.08 (19/252)	0.02	0.04	0.03	0.06	0.06	0.06	0.06	0.06	0.04	0.37	2.98	3.65	1.76	2.2	2.98
WBGene00000524	ZK563.4	clc-3	0.03	0.03	0.6	0.01	0.02	0.01	0.03	0.01	0.02	0.01	0.03	0.2	0.36	0.24	0.6	0.33	0.6	0.4	1.67	1.67	protein	205-222 aa	222				Claudin_2 [PF13903.5]; PMP22_Claudin [PF00822.19]	epithelial cell-cell adhesion [GO:0090136]; integral component of membrane [GO:0016021]; plasma membrane [GO:0005886]; striated muscle myosin thick filament assembly [GO:0071688]		TM(4x)			0.05	0.09	0.06	0.15	0.15	0.15	0.15	0.15	0.09	0.25	5.47	4.52	4.47	5.47	4.33
WBGene00000525	T05A10.2	clc-4	0	0.07	0.02	0	0	0	0	0.02	0.04	0.03	0.07	0.01	0.01	0.01	0.02	0.33	0.58	0.42	1.71	1.71	protein	194 aa	194				Claudin_3 [PF06653.10]	epithelial cell-cell adhesion [GO:0090136]	Unnamed protein [LSE0920]	SigP+TM(3x)			0.04	0.07	0.05	0.12	0.12	0.12	0.12	0.12	0.07	7.99	115.52	1.72	115.52	88.31	105.4
WBGene00000526	C01C10.4	clc-5	0.01	0.01	0.07	0.01	0.01	0.01	0.01	0.01	0.01	0.01	0.01	0.04	0.04	0.03	0.07	0.6	0.6	0.4	1.67	1.67	protein	281 aa	281				Clc-like [PF07062.11]	integral component of membrane [GO:0016021]	Unnamed protein [LSE0688]	TM(4x)			0.03	0.03	0.02	0.05	0.05	0.05	0.05	0.05	0.03	0.68	3.68	3.87	3.68	2.99	2.68
WBGene00000527	C36B1.1	cle-1	0.04	0.02	0.07	0.04	0	0	0	0.02	0	0	0	0.07	0	0	0.01	8.33	0.06	0.04	0.12	8.33	protein	650-1175 aa	1175				Collagen [PF01391.17]; Endostatin [PF06482.10]; fn3 [PF00041.20]	axon guidance [GO:0007411]; basement membrane [GO:0005604]; cell adhesion [GO:0007155]; cell junction [GO:0030054]; extracellular matrix [GO:0031012]; hermaphrodite genitalia development [GO:0040035]; inductive cell migration [GO:0040039]; neuron migration [GO:0001764]; protein binding [GO:0005515]; protein localization to synapse [GO:0035418]; structural molecule activity [GO:0005198]; synapse o…	Collagens (type XV) [KOG3546]; Protein involved in cell adhesion [meNOG01999]; Receptor mediating netrin-dependent axon guidance [KOG4221]	SigP		SEG: 0.16 (103/650)	0.5	0.03	0.02	0.06	0.5	0.06	0.5	0.5	0.5	6.79	12.08	27.38	9.8	12.08	11.8
WBGene00000528	T27D12.2	clh-1	0	0	0.5	0	0	0	0	0	0	0	0	0.17	0.33	0.17	0.5	0.33	0.67	0.33	1.5	1.5	protein	902-906 aa	906				CBS [PF00571.27]; Voltage_CLC [PF00654.19]	adenyl nucleotide binding [GO:0030554]; chloride transport [GO:0006821]; ion channel activity [GO:0005216]; membrane [GO:0016020]; transmembrane transport [GO:0055085]; voltage-gated chloride channel activity [GO:0005247]	Chloride channel [meNOG05621]; Chloride channel protein EriC [COG0038]; Cl- channel CLC-2 and related proteins (CLC superfamily) [KOG0476]	TM(10x)		SEG: 0.02 (16/906)	0.01	0.02	0.01	0.03	0.03	0.03	0.03	0.03	0.02	0.06	17.89	18.16	13.11	15.75	17.89
WBGene00000529	B0491.8	clh-2	0.02	0.05	0.8	0	0.01	0.01	0.02	0.01	0.04	0.02	0.05	0.2	0.6	0.4	0.8	0.25	0.75	0.5	1.33	1.33	protein	844-880 aa	880				CBS [PF00571.27]; Voltage_CLC [PF00654.19]	adenyl nucleotide binding [GO:0030554]; chloride transport [GO:0006821]; embryo development ending in birth or egg hatching [GO:0009792]; ion channel activity [GO:0005216]; membrane [GO:0016020]; reproduction [GO:0000003]; transmembrane transport [GO:0055085]; voltage-gated chloride channel activity [GO:0005247]	Chloride channel [meNOG05621]; Chloride channel protein EriC [COG0038]; Cl- channel CLC-2 and related proteins (CLC superfamily) [KOG0476]	TM(11x); TM(12x)		SEG: 0.05 (45/880)	0.01	0.03	0.02	0.04	0.04	0.04	0.04	0.04	0.03	0.05	2.12	0.8	1.88	2.09	2.12
WBGene00000530	E04F6.11	clh-3	0	0	1	0	0	0	0	0	0	0	0	0.33	0.67	0.33	1	0.33	0.67	0.33	1.5	1.5	protein	829-1001 aa	1001				CBS [PF00571.27]; Voltage_CLC [PF00654.19]	adenyl nucleotide binding [GO:0030554]; catalytic activity [GO:0003824]; chloride transport [GO:0006821]; ion channel activity [GO:0005216]; membrane [GO:0016020]; plasma membrane [GO:0005886]; transmembrane transport [GO:0055085]; voltage-gated chloride channel activity [GO:0005247]	Chloride channel [meNOG05621]; Chloride channel protein EriC [COG0038]; Cl- channel CLC-2 and related proteins (CLC superfamily) [KOG0476]	TM(11x)		SEG: 0.05 (46/1001)	0.01	0.02	0.01	0.03	0.03	0.03	0.03	0.03	0.02	0.03	12.85	10.64	9.76	9.26	12.85
WBGene00000531	T06F4.2	clh-4	0.03	0.05	0.21	0.01	0.02	0.01	0.03	0.02	0.03	0.02	0.05	0.07	0.14	0.07	0.21	0.33	0.67	0.33	1.5	1.5	protein	1050-1085 aa	1085				CBS [PF00571.27]; Voltage_CLC [PF00654.19]	adenyl nucleotide binding [GO:0030554]; catalytic activity [GO:0003824]; chloride transport [GO:0006821]; ion channel activity [GO:0005216]; membrane [GO:0016020]; transmembrane transport [GO:0055085]; voltage-gated chloride channel activity [GO:0005247]	Chloride channel [meNOG05621]; Chloride channel protein EriC [COG0038]; Cl- channel CLC-2 and related proteins (CLC superfamily) [KOG0476]	TM(12x)	NCoils: 0.02 (21/1050); 0.02 (21/1085)	SEG: 0.11 (118/1085)	0.01	0.02	0.01	0.03	0.03	0.03	0.03	0.03	0.02	0.14	1.03	0.63	0.81	1.03	0.97
WBGene00000532	C07H4.2	clh-5	0	0	0.05	0	0	0	0	0	0	0	0	0.05	0.05	0.05	0.05	1	1	1	1	1	protein	797 aa	797				CBS [PF00571.27]; Voltage_CLC [PF00654.19]	adenyl nucleotide binding [GO:0030554]; chloride transport [GO:0006821]; ion channel activity [GO:0005216]; membrane [GO:0016020]; transmembrane transport [GO:0055085]; voltage-gated chloride channel activity [GO:0005247]	Chloride channel [meNOG00583]; Chloride channel protein EriC [COG0038]; Cl- channel CLC-3 and related proteins (CLC superfamily) [KOG0475]	TM(12x)		SEG: 0.09 (71/797)	0.01	0.01	0.01	0.01	0.01	0.01	0.01	0.01	0.01	0.21	14.2	42.89	12.08	12.27	14.2
WBGene00000533	R07B7.1	clh-6	0	0	0.05	0	0	0	0	0	0	0	0	0.03	0.03	0.03	0.05	0.5	0.5	0.5	2	2	protein	796 aa	796				CBS [PF00571.27]; Voltage_CLC [PF00654.19]	adenyl nucleotide binding [GO:0030554]; chloride transport [GO:0006821]; ion channel activity [GO:0005216]; membrane [GO:0016020]; transmembrane transport [GO:0055085]; voltage-gated chloride channel activity [GO:0005247]	Chloride channel [meNOG01234]; Chloride channel protein EriC [COG0038]; Cl- channel CLC-7 and related proteins (CLC superfamily) [KOG0474]	TM(10x)		SEG: 0.13 (104/796)	0.01	0.01	0.01	0.02	0.02	0.02	0.02	0.02	0.01	0.37	9.91	27.24	9.39	8.46	9.91
WBGene00000534	R01B10.1	cpi-2	0.12	0.16	0.25	0.01	0.04	0	0.12	0.02	0.06	0	0.16	0.03	0.09	0.01	0.25	0.11	0.38	0.02	2.66	2.66	protein	82-143 aa	143	Housekeeping			Cystatin [PF00031.20]	cysteine-type endopeptidase inhibitor activity [GO:0004869]; reproduction [GO:0000003]	Unnamed protein [LSE3967]	SigP			4.85	16.42	0.92	43.7	43.7	43.7	43.7	43.7	16.42	176.98	366.39	266.37	347.97	345.9	366.39
WBGene00000535	K08B4.6	cpi-1	0	0	0.08	0	0	0	0	0	0	0	0	0.02	0.01	0.01	0.08	0.29	0.1	0.07	3.42	3.42	protein	139 aa	139				Cystatin [PF00031.20]	cysteine-type endopeptidase inhibitor activity [GO:0004869]	Unnamed protein [LSE3967]	SigP		SEG: 0.08 (11/139)	0.24	0.08	0.06	0.82	0.82	0.82	0.82	0.82	0.24	10.85	196.25	255.09	154.97	196.25	142.14
WBGene00000536	ZC395.2	clk-1	0.5	0.42	0.33	0	0.5	0	0.01	0	0.42	0	0.01	0	0.33	0	0.01	0.01	55.85	0	0.02	55.85	protein	187 aa	187				COQ7 [PF03232.12]	adult behavior [GO:0030534]; cellular respiration [GO:0045333]; determination of adult lifespan [GO:0008340]; mitochondrion [GO:0005739]; oxidation-reduction process [GO:0055114]; oxidative phosphorylation [GO:0006119]; positive regulation of behavior [GO:0048520]; positive regulation of developmental process [GO:0051094]; positive regulation of growth rate [GO:0040010]; regulatory region DNA bin…	Coenzyme Q7 homolog, ubiquinone (yeast) [meNOG05670]; DMQ mono-oxygenase/Ubiquinone biosynthesis protein COQ7\/CLK-1\/CAT5 [KOG4061]; Ubiquinone biosynthesis protein COQ7 [COG2941]				0.18	18.99	0.04	0.34	18.99	18.99	0.34	18.99	18.99	57.78	38.35	44.71	30.12	33.33	38.35
WBGene00000537	C07H6.6	clk-2	0	0	0.01	0	0	0	0	0	0	0	0	0	0	0	0.01	0.5	0.5	0.5	2	2	protein	877 aa	877				Telomere_reg-2 [PF10193.8]	DNA damage checkpoint [GO:0000077]; cytoplasm [GO:0005737]; determination of adult lifespan [GO:0008340]; embryo development ending in birth or egg hatching [GO:0009792]; reproduction [GO:0000003]; response to UV [GO:0009411]; response to X-ray [GO:0010165]; telomere maintenance [GO:0000723]	Uncharacterized conserved protein [KOG4346]				0.01	0.01	0.01	0.02	0.02	0.02	0.02	0.02	0.01	3.28	5.92	27.13	5.08	4.33	5.92
WBGene00000539	F07B10.1	cln-3.1	0.02	0.02	0.1	0.01	0.01	0.01	0.02	0.01	0.01	0.01	0.02	0.04	0.06	0.04	0.1	0.38	0.62	0.38	1.6	1.6	protein	387-424 aa	424				CLN3 [PF02487.16]	cytoplasm [GO:0005737]; determination of adult lifespan [GO:0008340]; membrane [GO:0016020]; regulation of oviposition [GO:0046662]	Ceroid-Lipofuscinosis, neuronal 3 protein [meNOG01823]; Predicted small molecule transporter involved in cellular pH homeostasis (Batten disease protein in human) [KOG3880]	SigP+TM(7x); TM(6x)		SEG: 0.06 (25/424)	0.03	0.05	0.03	0.08	0.08	0.08	0.08	0.08	0.05	0.82	4.16	4.57	2.93	2.83	4.16
WBGene00000540	C01G8.2	cln-3.2	0.01	0	1.33	0	0	0	0.01	0	0	0	0	0.33	0.67	0.67	1.33	0.25	0.5	0.5	2	2	protein	435 aa	435				CLN3 [PF02487.16]	determination of adult lifespan [GO:0008340]; embryo development ending in birth or egg hatching [GO:0009792]; membrane [GO:0016020]; regulation of oviposition [GO:0046662]		TM(9x)		SEG: 0.04 (19/435)	0.01	0.02	0.02	0.04	0.04	0.04	0.04	0.04	0.02	0.03	6.8	13.3	6.8	6.55	6.55
WBGene00000541	ZC190.1	cln-3.3	0.02	0.02	0.1	0.01	0.01	0.01	0.02	0.01	0.01	0.01	0.02	0.07	0.06	0.04	0.1	0.71	0.57	0.43	1.4	1.4	protein	417 aa	417				CLN3 [PF02487.16]	determination of adult lifespan [GO:0008340]; membrane [GO:0016020]; regulation of oviposition [GO:0046662]	Ceroid-Lipofuscinosis, neuronal 3 protein [meNOG01823]; Predicted small molecule transporter involved in cellular pH homeostasis (Batten disease protein in human) [KOG3880]	TM(9x)		SEG: 0.10 (41/417)	0.05	0.04	0.03	0.07	0.07	0.07	0.07	0.07	0.05	0.71	3.92	3.72	3.77	3.92	3.44
WBGene00000542	C06G4.2	clp-1	0	0	0.01	0	0	0	0	0	0	0	0	0.01	0.01	0	0.01	0.53	0.59	0.44	1.68	1.68	protein	113-780 aa	780	Housekeeping			Calpain_III [PF01067.21]; Peptidase_C2 [PF00648.20]	M band [GO:0031430]; calcium-dependent cysteine-type endopeptidase activity [GO:0004198]; cell death [GO:0008219]; intracellular [GO:0005622]; necrotic cell death [GO:0070265]; positive regulation of necrotic cell death [GO:0010940]; proteolysis [GO:0006508]; sarcomere [GO:0030017]	Calcium-Dependent cysteine-type endopeptidase [meNOG00582]; Cytosolic Ca2+-dependent cysteine protease (calpain), large subunit (EF-Hand protein superfamily) [KOG0045]			SEG: 0.39 (44/113)	0.17	0.19	0.14	0.32	0.32	0.32	0.32	0.32	0.19	30.5	73.04	86.02	70.46	73.04	72.33
WBGene00000543	T04A8.16	clp-2	0	0	0.04	0	0	0	0	0	0	0	0	0.02	0.02	0.02	0.04	0.5	0.5	0.5	2	2	protein	805 aa	805				Calpain_III [PF01067.21]; MIT [PF04212.17]; Peptidase_C2 [PF00648.20]	calcium-dependent cysteine-type endopeptidase activity [GO:0004198]; intracellular [GO:0005622]; lipid storage [GO:0019915]; proteolysis [GO:0006508]	Calpain 7 protein [meNOG07462]; Cytosolic Ca2+-dependent cysteine protease (calpain), large subunit (EF-Hand protein superfamily) [KOG0045]		NCoils: 0.05 (42/805)	SEG: 0.02 (16/805)	0.01	0.01	0.01	0.02	0.02	0.02	0.02	0.02	0.01	0.52	15.14	23.31	14.43	12.56	15.14
WBGene00000544	Y47H10A.1	clp-3	0	0.06	0.02	0	0	0	0	0.03	0.03	0.03	0.06	0.01	0.01	0.01	0.02	0.5	0.5	0.5	2	2	protein	702 aa	702				Calpain_III [PF01067.21]; Peptidase_C2 [PF00648.20]	calcium-dependent cysteine-type endopeptidase activity [GO:0004198]; cell death [GO:0008219]; cysteine-type peptidase activity [GO:0008234]; intracellular [GO:0005622]; proteolysis [GO:0006508]	Cytosolic Ca2+-dependent cysteine protease (calpain), large subunit (EF-Hand protein superfamily) [KOG0045]			SEG: 0.02 (15/702)	0.01	0.01	0.01	0.02	0.02	0.02	0.02	0.02	0.01	1.09	16.66	0.32	16.66	13.24	14.69
WBGene00000545	Y39A3CL.5	clp-4	0	0	0.03	0	0	0	0	0	0	0	0	0.01	0.01	0.01	0.03	0.25	0.5	0.5	2	2	protein	603-716 aa	716				Calpain_III [PF01067.21]; Peptidase_C2 [PF00648.20]	calcium-dependent cysteine-type endopeptidase activity [GO:0004198]; cell death [GO:0008219]; intracellular [GO:0005622]; proteolysis [GO:0006508]	Calpain 8 protein [meNOG10220]; Cytosolic Ca2+-dependent cysteine protease (calpain), large subunit (EF-Hand protein superfamily) [KOG0045]			SEG: 0.10 (60/603)	0.01	0.02	0.02	0.04	0.04	0.04	0.04	0.04	0.02	1.43	19.52	11.13	17.43	19.52	16.38
WBGene00000546	Y77E11A.10	clp-6	0	0.03	0.01	0	0	0	0	0.02	0.02	0.02	0.03	0	0	0	0.01	0.5	0.5	0.5	2	2	protein	627 aa	627				Calpain_III [PF01067.21]; Peptidase_C2 [PF00648.20]	calcium-dependent cysteine-type endopeptidase activity [GO:0004198]; cell death [GO:0008219]; intracellular [GO:0005622]; proteolysis [GO:0006508]				SEG: 0.05 (33/627)	0.01	0.01	0.01	0.02	0.02	0.02	0.02	0.02	0.01	3.24	45.69	0.66	43.66	36.87	45.69
WBGene00000547	Y77E11A.11	clp-7	0.02	0.02	0.05	0	0.02	0	0	0	0.02	0	0	0.01	0.05	0	0.01	0.11	8.44	0.05	0.12	8.44	protein	291-778 aa	778				Calpain_III [PF01067.21]; Peptidase_C2 [PF00648.20]	calcium-dependent cysteine-type endopeptidase activity [GO:0004198]; cell death [GO:0008219]; intracellular [GO:0005622]; proteolysis [GO:0006508]				SEG: 0.28 (217/778)	0.08	0.76	0.04	0.09	0.76	0.76	0.09	0.76	0.76	14.18	36.52	44.74	33.12	32.38	36.52
WBGene00000548	F56D1.4	clr-1	0	0	0.2	0	0	0	0	0	0	0	0	0.05	0.1	0.1	0.2	0.25	0.5	0.5	2	2	protein	942-1444 aa	1444				DSPc [PF00782.19]; Y_phosphatase [PF00102.26]; Y_phosphatase3 [PF13350.5]; fn3 [PF00041.20]	body morphogenesis [GO:0010171]; collagen and cuticulin-based cuticle development [GO:0040002]; locomotion [GO:0040011]; negative regulation of fibroblast growth factor receptor signaling pathway [GO:0040037]; nematode larval development [GO:0002119]; oviposition [GO:0018991]; peptidyl-tyrosine dephosphorylation [GO:0035335]; plasma membrane [GO:0005886]; protein binding [GO:0005515]; protein dep…	Protein tyrosine phosphatase [COG5599]; Protein tyrosine phosphatase [KOG4228]; Protein tyrosine phosphatase [meNOG13870]	SigP+TM(1x)		SEG: 0.02 (23/1444)	0.01	0.02	0.02	0.04	0.04	0.04	0.04	0.04	0.02	0.2	16.3	46.73	13.29	11.45	16.3
WBGene00000549	R107.6	cls-2	0	0	1	0	0	0	0	0	0	0	0	0.25	0.5	0.5	1	0.25	0.5	0.5	2	2	protein	1020-1023 aa	1023				CLASP_N [PF12348.7]	binding [GO:0005488]; centrosome [GO:0005813]; cytoplasm [GO:0005737]; cytoplasmic transport [GO:0016482]; embryo development ending in birth or egg hatching [GO:0009792]; kinetochore [GO:0000776]; locomotion [GO:0040011]; mitotic cytokinesis [GO:0000281]; mitotic nuclear division [GO:0007067]; mitotic sister chromatid separation [GO:0051306]; mitotic spindle [GO:0072686]; mitotic spindle organiz…	CLIP-associating protein [KOG2956]; Protein involved in negative regulation of microtubule depolymerization [meNOG02172]			SEG: 0.04 (42/1023)	0.01	0.02	0.02	0.04	0.04	0.04	0.04	0.04	0.02	0.04	20.28	35.06	19.9	18.91	20.28
WBGene00000550	F55H2.6	clu-1	0	0	0.03	0	0	0	0	0	0	0	0	0.03	0.01	0	0	2	0.5	0.17	0.17	2	protein	1247 aa	1247				CLU [PF13236.5]; CLU_N [PF15044.5]; DUF727 [PF05303.11]; TPR_10 [PF13374.5]; TPR_12 [PF13424.5]; eIF3_p135 [PF12807.6]	embryo development ending in birth or egg hatching [GO:0009792]; protein binding [GO:0005515]	Eukaryotic translation initiation factor 3 subunit [meNOG01621]; FOG: TPR repeat [COG0457]; Uncharacterized protein CLU1/cluA\/TIF31 involved in mitochondrial morphology\/distribution, also found associated with eIF-3 [KOG1839]			SEG: 0.03 (39/1247)	0.06	0.03	0	0.01	0.06	0.03	0.06	0.06	0.06	2.07	37.65	87.58	34.23	32.33	37.65
WBGene00000551	C50F7.2	clx-1	0.75	0.16	1	0.25	0.5	0.25	0.75	0.05	0.11	0.05	0.16	0.33	0.67	0.33	1	0.33	0.67	0.33	1.5	1.5	protein	558 aa	558				Loricrin [PF15847.4]			SigP		SEG: 0.91 (507/558)	0.01	0.02	0.01	0.03	0.03	0.03	0.03	0.03	0.02	0.03	0.04	0.19	0.02	0.04	0.02
WBGene00000552	T21H3.3	cmd-1	0.01	0.01	0.13	0.01	0	0	0	0.01	0	0	0	0.13	0.01	0	0.01	19.78	0.05	0.01	0.04	19.78	protein	149 aa	149	Housekeeping			EF-hand_1 [PF00036.31]; EF-hand_11 [PF08976.10]; EF-hand_4 [PF12763.6]; EF-hand_5 [PF13202.5]; EF-hand_6 [PF13405.5]; EF-hand_7 [PF13499.5]; EF-hand_8 [PF13833.5]; EF-hand_9 [PF14658.5]; EFhand_Ca_insen [PF08726.9]; SPARC_Ca_bdg [PF10591.8]	apoptotic cell clearance [GO:0043277]; apoptotic process [GO:0006915]; calcium ion binding [GO:0005509]; cell migration [GO:0016477]; cell periphery [GO:0071944]; centrosome [GO:0005813]; embryo development [GO:0009790]; embryo development ending in birth or egg hatching [GO:0009792]; establishment of meiotic spindle orientation [GO:0051296]; mitotic spindle [GO:0072686]; mitotic spindle organiza…	Ca2+-binding protein (EF-Hand superfamily) [COG5126]; Calmodulin and related proteins (EF-Hand superfamily) [KOG0027]; Calmodulin protein [meNOG10158]				1.78	0.09	0.02	0.07	1.78	0.09	1.78	1.78	1.78	13.85	338.81	277.5	338.81	319.7	316.17
WBGene00000553	K07A9.2	cmk-1	0.01	0.01	0.3	0	0	0	0.01	0	0.01	0	0.01	0.1	0.2	0.1	0.3	0.33	0.67	0.33	1.5	1.5	protein	348 aa	348				Kdo [PF06293.13]; Kinase-like [PF14531.5]; Pkinase [PF00069.24]; Pkinase_Tyr [PF07714.16]	ATP binding [GO:0005524]; calmodulin binding [GO:0005516]; calmodulin-dependent protein kinase activity [GO:0004683]; cytoplasm [GO:0005737]; neuron projection morphogenesis [GO:0048812]; nucleus [GO:0005634]; positive regulation of CREB transcription factor activity [GO:0032793]; positive regulation of transcription from RNA polymerase II promoter [GO:0045944]; protein autophosphorylation [GO:00…	Ca2+/calmodulin-dependent protein kinase, EF-Hand protein superfamily [KOG0032]; Calcium\/Calmodulin-Dependent protein kinase [meNOG12311]; Serine\/threonine protein kinase [COG0515]		NCoils: 0.07 (24/348)		0.01	0.02	0.01	0.03	0.03	0.03	0.03	0.03	0.02	0.1	4.02	2.14	3.3	3.61	4.02
WBGene00000554	F55C10.1	cnb-1	0	0.01	0.01	0	0	0	0	0.01	0	0	0	0.01	0.01	0	0.01	1.2	0.5	0.33	0.83	1.2	protein	170-171 aa	171				EF-hand_1 [PF00036.31]; EF-hand_4 [PF12763.6]; EF-hand_5 [PF13202.5]; EF-hand_6 [PF13405.5]; EF-hand_7 [PF13499.5]; EF-hand_8 [PF13833.5]; SPARC_Ca_bdg [PF10591.8]	calcium ion binding [GO:0005509]; endoplasmic reticulum [GO:0005783]; sarcomere [GO:0030017]; striated muscle dense body [GO:0055120]	Ca2+-binding protein (EF-Hand superfamily) [COG5126]; Ca2+/calmodulin-dependent protein phosphatase (calcineurin subunit B), EF-Hand superfamily protein [KOG0034]				0.18	0.09	0.06	0.15	0.18	0.15	0.18	0.18	0.18	14.31	45.94	35.6	41.97	45.94	41.16
WBGene00000555	R09B5.2	cnc-1	0.27	0.17	0.9	0.1	0.16	0.12	0.27	0.06	0.1	0.07	0.17	0.34	0.54	0.39	0.9	0.38	0.59	0.43	1.68	1.68	protein	62 aa	62					defense response to fungus [GO:0050832]; innate immune response [GO:0045087]	Unnamed protein [LSE4106]	SigP+TM(1x)		SEG: 0.85 (53/62)	0.14	0.22	0.16	0.37	0.37	0.37	0.37	0.37	0.22	0.41	1.36	2.23	1.36	0.49	1.12
WBGene00000556	R09B5.3	cnc-2	0	0	0.2	0	0	0	0	0	0	0	0	0.07	0.12	0.08	0.2	0.38	0.58	0.42	1.71	1.71	protein	72 aa	72					defense response to Gram-negative bacterium [GO:0050829]; defense response to fungus [GO:0050832]; extracellular space [GO:0005615]; innate immune response [GO:0045087]	Unnamed protein [LSE4106]	SigP+TM(1x)		SEG: 0.72 (52/72)	0.09	0.14	0.1	0.24	0.24	0.24	0.24	0.24	0.14	1.21	70.46	107.4	62.82	36.77	70.46
WBGene00000557	R09B5.8	cnc-3	0.01	0.01	0.12	0.01	0.01	0.01	0.01	0	0.01	0.01	0.01	0.04	0.07	0.05	0.12	0.37	0.58	0.42	1.73	1.73	protein	82 aa	82						Unnamed protein [LSE4106]	SigP		SEG: 0.78 (64/82)	0.07	0.11	0.08	0.19	0.19	0.19	0.19	0.19	0.11	1.63	13.65	14.67	13.42	13.65	12.22
WBGene00000558	R09B5.9	cnc-4	0	0	0.21	0	0	0	0	0	0	0	0	0.15	0.13	0.08	0.21	0.7	0.6	0.4	1.43	1.43	protein	66 aa	66					defense response to fungus [GO:0050832]; innate immune response [GO:0045087]	Unnamed protein [LSE4106]	SigP+TM(1x)		SEG: 0.64 (42/66)	0.14	0.12	0.08	0.2	0.2	0.2	0.2	0.2	0.14	0.95	51.65	114.85	51.65	40.61	41.72
WBGene00000559	R09B5.10	cnc-5	0.56	0.72	0.89	0.21	0.33	0.25	0.56	0.27	0.43	0.32	0.72	0.33	0.53	0.39	0.89	0.37	0.6	0.44	1.68	1.68	protein	68 aa	68					defense response to fungus [GO:0050832]; determination of adult lifespan [GO:0008340]; innate immune response [GO:0045087]	Unnamed protein [LSE4106]	SigP		SEG: 0.85 (58/68)	0.21	0.34	0.25	0.57	0.57	0.57	0.57	0.57	0.34	0.64	1.02	0.79	0.98	0.44	1.02
WBGene00000560	Y46E12A.1	cnc-6	0.01	0.02	1.13	0	0.01	0	0.01	0.01	0.01	0.01	0.02	0.4	0.67	0.47	1.13	0.35	0.59	0.41	1.7	1.7	protein	98 aa	98					defense response to fungus [GO:0050832]; innate immune response [GO:0045087]		SigP		SEG: 0.44 (43/98)	0.06	0.1	0.07	0.17	0.17	0.17	0.17	0.17	0.1	0.15	16.73	9.92	16.73	8.7	7.43
WBGene00000561	C34E10.7	cnd-1	0.13	0.06	0.57	0.05	0.08	0.05	0.13	0.02	0.04	0.02	0.06	0.21	0.36	0.21	0.57	0.38	0.62	0.38	1.6	1.6	protein	192 aa	192		TF[Gupta+Thomas+Walhout]		HLH [PF00010.25]; Neuro_bHLH [PF12533.7]	axonal fasciculation [GO:0007413]; neuron differentiation [GO:0030182]; nucleus [GO:0005634]; oviposition [GO:0018991]; protein dimerization activity [GO:0046983]; sequence-specific DNA binding transcription factor activity [GO:0003700]	Neurogenic differentiation protein [meNOG07353]; Transcription factor NeuroD and related HTH proteins [KOG3898]			SEG: 0.35 (67/192)	0.03	0.05	0.03	0.08	0.08	0.08	0.08	0.08	0.05	0.14	0.61	1.38	0.16	0.24	0.61
WBGene00000562	F14H8.6	cng-1	0.05	0.15	0.1	0.01	0.05	0.01	0.04	0.04	0.15	0.04	0.11	0.02	0.1	0.02	0.07	0.25	1.33	0.25	0.75	1.33	protein; ncRNA	661 aa	661				cNMP_binding [PF00027.28]	ion channel activity [GO:0005216]; ion transport [GO:0006811]; membrane [GO:0016020]; neuronal cell body [GO:0043025]; transmembrane transport [GO:0055085]		TM(5x)	NCoils: 0.04 (28/661)	SEG: 0.02 (14/661)	0.02	0.08	0.02	0.06	0.08	0.08	0.06	0.08	0.08	0.81	1.49	0.54	1.49	1.21	1.36
WBGene00000563	F38E11.12	cng-3	0.09	0.33	1	0.05	0.05	0.05	0.09	0.17	0.17	0.17	0.33	0.5	0.5	0.5	1	0.5	0.5	0.5	2	2	protein	626 aa	626				Ion_trans [PF00520.30]; cNMP_binding [PF00027.28]	ion channel activity [GO:0005216]; ion transport [GO:0006811]; membrane [GO:0016020]; nonmotile primary cilium [GO:0031513]; transmembrane transport [GO:0055085]	Cyclic nucleotide gated protein [meNOG01967]; Cyclic nucleotide-gated cation channel CNGA1-3 and related proteins [KOG0500]	TM(5x)		SEG: 0.02 (12/626)	0.01	0.01	0.01	0.02	0.02	0.02	0.02	0.02	0.01	0.02	0.22	0.06	0.17	0.12	0.22
WBGene00000564	R01H10.8	cnk-1	0	0	1	0	0	0	0	0	0	0	0	1	1	1	1	1	1	1	1	1	protein	801 aa	801				CRIC_ras_sig [PF10534.8]; PDZ [PF00595.23]; PH [PF00169.28]; SAM_1 [PF00536.29]; SAM_2 [PF07647.16]	nematode larval development [GO:0002119]; positive regulation of vulval development [GO:0040026]; protein binding [GO:0005515]	Connector enhancer of kinase suppressor of Ras 2 [meNOG02409]; Membrane-associated guanylate kinase-interacting protein/connector enhancer of KSR-like [KOG1738]			SEG: 0.10 (84/801)	0	0.01	0.01	0.01	0.01	0.01	0.01	0.01	0.01	0.01	10.45	26.63	10.18	9.14	10.45
WBGene00000565	Y17G7B.15	cnt-1	0	0	0	0	0	0	0	0	0	0	0	0	0	0	0	0.67	0.67	0.33	1.5	1.5	protein	742-826 aa	826	Housekeeping			Ank [PF00023.29]; Ank_2 [PF12796.6]; Ank_3 [PF13606.5]; Ank_4 [PF13637.5]; Ank_5 [PF13857.5]; ArfGap [PF01412.17]; BAR_3 [PF16746.4]; PH [PF00169.28]	ARF GTPase activator activity [GO:0008060]; lipid storage [GO:0019915]; nematode larval development [GO:0002119]; protein binding [GO:0005515]; regulation of ARF GTPase activity [GO:0032312]; zinc ion binding [GO:0008270]	Arfgap with coiled-coil, ankyrin repeat and PH domains protein [meNOG02769]; GTPase-activating protein that regulates ARFs (ADP-ribosylation factors), involved in ARF-mediated vesicular transport [COG5347]; Putative GTPase activating proteins (GAPs) [KOG0521]		NCoils: 0.04 (30/742)	SEG: 0.09 (64/742)	0.02	0.02	0.01	0.03	0.03	0.03	0.03	0.03	0.02	10.17	16.17	29.01	16.17	15.03	14.87
WBGene00000566	Y39A1A.15	cnt-2	0.01	0	1.09	0	0.01	0	0.01	0	0	0	0	0.36	0.64	0.45	1.09	0.33	0.58	0.42	1.71	1.71	protein	139-1107 aa	1107				Ank [PF00023.29]; Ank_2 [PF12796.6]; Ank_3 [PF13606.5]; Ank_4 [PF13637.5]; ArfGap [PF01412.17]; PH [PF00169.28]; Ras [PF00071.21]	ARF GTPase activator activity [GO:0008060]; GTP binding [GO:0005525]; GTP catabolic process [GO:0006184]; activation of ARF GTPase activity [GO:0032857]; asymmetric cell division [GO:0008356]; asymmetric neuroblast division [GO:0055059]; cell fate determination involved in pattern specification [GO:0060582]; embryo development ending in birth or egg hatching [GO:0009792]; intracellular [GO:000562…	Arfgap with GTPase domain, ankyrin repeat and PH domain-containing protein [meNOG00570]; GTPase-activating protein Centaurin gamma (contains Ras-like GTPase, PH and ankyrin repeat domains) [KOG0705]; GTPase-activating protein that regulates ARFs (ADP-ribosylation factors), involved in ARF-mediated vesicular transport [COG5347]			SEG: 0.12 (133/1107)	0.04	0.07	0.05	0.12	0.12	0.12	0.12	0.12	0.07	0.11	10.39	29.93	10.39	9.62	9.59
WBGene00000567	ZK632.6	cnx-1	0	0	0.01	0	0	0	0	0	0	0	0	0.01	0.01	0	0.01	0.6	0.6	0.4	1.67	1.67	protein	440-619 aa	619	Housekeeping			Calreticulin [PF00262.17]	calcium ion binding [GO:0005509]; embryo development ending in birth or egg hatching [GO:0009792]; endoplasmic reticulum [GO:0005783]; endoplasmic reticulum unfolded protein response [GO:0030968]; germ cell development [GO:0007281]; integral component of endoplasmic reticulum membrane [GO:0030176]; nematode larval development [GO:0002119]; perinuclear region of cytoplasm [GO:0048471]; positive re…	Calcium ion binding protein [meNOG03722]; Calnexin [KOG0675]	SigP+TM(1x); TM(1x)		SEG: 0.16 (70/440)	0.03	0.03	0.02	0.05	0.05	0.05	0.05	0.05	0.03	4.43	73.11	119.19	65.99	65.31	73.11
WBGene00000583	C48E7.5	cof-2	0.01	0.02	1	0	0.01	0	0.01	0.01	0.01	0.01	0.02	0.33	0.67	0.33	1	0.33	0.67	0.33	1.5	1.5	protein	486 aa	486				Collagen [PF01391.17]; OLF [PF02191.15]	protein binding [GO:0005515]	Gliomedin protein [meNOG06606]; Olfactomedin and related extracellular matrix glycoproteins [KOG3545]	TM(1x)		SEG: 0.09 (42/486)	0.01	0.02	0.01	0.03	0.03	0.03	0.03	0.03	0.02	0.03	3.15	1.88	2.42	2.86	3.15
WBGene00000584	R03C1.3	cog-1	0.08	0.1	1.09	0.03	0.05	0.03	0.08	0.03	0.07	0.04	0.1	0.36	0.73	0.45	1.09	0.33	0.67	0.42	1.5	1.5	protein	106-256 aa	256		TF[Gupta+Thomas+Walhout]		Homeobox [PF00046.28]; Homez [PF11569.7]	DNA binding [GO:0003677]; body morphogenesis [GO:0010171]; determination of left/right symmetry [GO:0007368]; gonad development [GO:0008406]; hermaphrodite genitalia development [GO:0040035]; oviposition [GO:0018991]; pattern specification process [GO:0007389]; positive regulation of vulval development [GO:0040026]; repressing transcription factor binding [GO:0070491]; reproduction [GO:0000003]	NK6 homeobox protein [meNOG11405]; Transcription factor, contains HOX domain [KOG0847]			SEG: 0.18 (47/256)	0.04	0.08	0.05	0.12	0.12	0.12	0.12	0.12	0.08	0.11	1.5	1.18	1.44	1.5	1.38
WBGene00000585	C06G3.10	cogc-2	0	0	0	0	0	0	0	0	0	0	0	0	0	0	0	2	0.25	0.25	0.5	2	protein	681 aa	681				COG2 [PF06148.10]; DUF3510 [PF12022.7]; Vps51 [PF08700.10]	Golgi organization [GO:0007030]; apoptotic process [GO:0006915]; embryo development ending in birth or egg hatching [GO:0009792]; gonad morphogenesis [GO:0035262]; hermaphrodite genitalia development [GO:0040035]; inductive cell migration [GO:0040039]; membrane [GO:0016020]; nematode larval development [GO:0002119]; oogenesis [GO:0048477]; protein transport [GO:0015031]; regulation of cell migrat…	Component of oligomeric golgi complex 2 protein [meNOG10372]; Low density lipoprotein receptor [KOG2307]			SEG: 0.02 (13/681)	0.04	0.01	0.01	0.02	0.04	0.02	0.04	0.04	0.04	8.86	26.48	47.11	25.85	22.03	26.48
WBGene00000591	K08A8.3	coh-1	0	0	0.33	0	0	0	0	0	0	0	0	0.33	0.33	0.33	0.33	1	1	1	1	1	protein	652 aa	652				Rad21_Rec8 [PF04824.15]; Rad21_Rec8_N [PF04825.12]; SMC_ScpA [PF02616.13]	damaged DNA binding [GO:0003684]; embryo development ending in birth or egg hatching [GO:0009792]; locomotion [GO:0040011]; meiotic chromosome segregation [GO:0045132]; meiotic nuclear division [GO:0007126]; nematode larval development [GO:0002119]; nuclear chromosome [GO:0000228]; nucleus [GO:0005634]; protein binding [GO:0005515]; synaptonemal complex assembly [GO:0007130]	RAD21 homolog (S. pombe) protein [meNOG01378]; Sister chromatid cohesion complex Cohesin, subunit RAD21/SCC1 [KOG1213]		NCoils: 0.03 (21/652)	SEG: 0.10 (65/652)	0	0.01	0.01	0.01	0.01	0.01	0.01	0.01	0.01	0.03	2.2	12.83	1.78	1.68	2.2
WBGene00000592	F08H9.1	coh-3	0	0	0.03	0	0	0	0	0	0	0	0	0.03	0.01	0.01	0.01	2	0.25	0.25	0.5	2	protein	607 aa	607				Rad21_Rec8 [PF04824.15]	embryo development ending in birth or egg hatching [GO:0009792]; meiotic chromosome segregation [GO:0045132]; meiotic nuclear division [GO:0007126]; nuclear chromosome [GO:0000228]	Unnamed protein [LSE4053]		NCoils: 0.07 (42/607)	SEG: 0.08 (49/607)	0.04	0.01	0.01	0.02	0.04	0.02	0.04	0.04	0.04	1.38	11.52	24.73	10.26	10.11	11.52
WBGene00000593	W01B6.7	col-2	0.63	0.72	0.22	0.27	0.63	0.09	0.21	0.3	0.72	0.1	0.24	0.1	0.22	0.03	0.08	0.42	2.36	0.14	0.34	2.36	protein	301 aa	301				Col_cuticle_N [PF01484.16]; Collagen [PF01391.17]	embryo development ending in birth or egg hatching [GO:0009792]; structural constituent of cuticle [GO:0042302]	Collagens (type IV and type XIII), and related proteins [KOG3544]	TM(1x)		SEG: 0.68 (205/301)	0.39	0.92	0.13	0.31	0.92	0.92	0.39	0.92	0.92	4.1	1.46	1.28	0.55	1.46	0.78
WBGene00000594	T28C6.6	col-3	0.86	1.53	0.14	0.86	0.08	0.41	0.11	1.53	0.14	0.73	0.2	0.14	0.01	0.06	0.02	2.1	0.09	0.48	0.13	2.1	protein	299 aa	299	Housekeeping			Col_cuticle_N [PF01484.16]; Collagen [PF01391.17]	body morphogenesis [GO:0010171]; lipid storage [GO:0019915]; locomotion [GO:0040011]; nematode larval development [GO:0002119]; receptor-mediated endocytosis [GO:0006898]; structural constituent of cuticle [GO:0042302]	Collagens (type IV and type XIII), and related proteins [KOG3544]	TM(1x)		SEG: 0.66 (196/299)	86.51	7.72	41.17	11.18	86.51	41.17	86.51	86.51	86.51	633.71	100.67	56.5	61.87	100.67	70.03
WBGene00000596	C15A11.5	col-7	0.06	0.11	0.13	0.06	0	0	0	0.11	0	0	0	0.13	0.01	0	0	22.78	0.04	0.01	0.03	22.78	protein	316 aa	316				Col_cuticle_N [PF01484.16]; Collagen [PF01391.17]	structural constituent of cuticle [GO:0042302]	Collagens (type IV and type XIII), and related proteins [KOG3544]	TM(1x)		SEG: 0.58 (182/316)	2.05	0.09	0.02	0.06	2.05	0.09	2.05	2.05	2.05	15.57	34.73	19.45	10.66	34.73	11.8
WBGene00000597	F11H8.3	col-8	8.33	11.9	3.55	8.33	3.89	6.89	4.42	11.9	5.56	9.85	6.31	3.55	1.66	2.94	1.89	1.21	0.47	0.83	0.53	1.21	protein	282 aa	282				Col_cuticle_N [PF01484.16]; Collagen [PF01391.17]	structural constituent of cuticle [GO:0042302]	Collagens (type IV and type XIII), and related proteins [KOG3544]	SigP		SEG: 0.52 (147/282)	18828.2	8801.41	15583.5	9987.9	18828.2	15583.5	18828.2	18828.2	18828.2	5296.38	2260.42	1582.2	1650.13	2260.42	1850.39
WBGene00000598	F54B11.1	col-9	0.38	0.67	1.2	0.12	0.19	0.12	0.38	0.22	0.33	0.22	0.67	0.4	0.6	0.4	1.2	0.33	0.5	0.33	2	2	protein	339 aa	339				Col_cuticle_N [PF01484.16]; Collagen [PF01391.17]	structural constituent of cuticle [GO:0042302]	Collagens (type IV and type XIII), and related proteins [KOG3544]	TM(1x)		SEG: 0.38 (130/339)	0.02	0.03	0.02	0.06	0.06	0.06	0.06	0.06	0.03	0.05	0.16	0.09	0.08	0.07	0.16
WBGene00000599	B0222.8	col-10	0.09	0.12	0.01	0.09	0.03	0.04	0.04	0.12	0.04	0.05	0.05	0.01	0	0	0	2.38	0.33	0.41	0.42	2.38	protein	294 aa	294	Housekeeping			Col_cuticle_N [PF01484.16]; Collagen [PF01391.17]	structural constituent of cuticle [GO:0042302]	Collagens (type IV and type XIII), and related proteins [KOG3544]	SigP		SEG: 0.55 (162/294)	5.61	1.85	2.28	2.36	5.61	2.36	5.61	5.61	5.61	555.33	63.16	46.53	32.95	59.19	63.16
WBGene00000601	F15H10.1	col-12	1.95	2.41	0.12	1.95	0.3	1.62	0.08	2.41	0.37	2	0.1	0.12	0.02	0.1	0	1.2	0.15	0.83	0.04	1.2	protein	316 aa	316				Col_cuticle_N [PF01484.16]; Collagen [PF01391.17]	structural constituent of cuticle [GO:0042302]	Collagens (type IV and type XIII), and related proteins [KOG3544]	TM(1x)		SEG: 0.53 (166/316)	250	38.27	207.65	10.71	250	207.65	250	250	250	2162.15	128.29	103.59	36.85	128.29	47.78
WBGene00000602	F15H10.2	col-13	9.84	12.21	0.32	9.84	7.06	4.95	1.34	12.21	8.75	6.15	1.67	0.32	0.23	0.16	0.04	1.4	0.72	0.5	0.14	1.4	protein	316 aa	316				Col_cuticle_N [PF01484.16]; Collagen [PF01391.17]	structural constituent of cuticle [GO:0042302]	Collagens (type IV and type XIII), and related proteins [KOG3544]	TM(1x)		SEG: 0.53 (166/316)	376.83	270.08	189.62	51.42	376.83	270.08	376.83	376.83	376.83	1161.21	38.28	30.85	18.3	38.28	14.9
WBGene00000603	C46A5.3	col-14	0.16	0.22	0.05	0.16	0.04	0.03	0.04	0.22	0.05	0.04	0.05	0.05	0.01	0.01	0.01	4.46	0.22	0.2	0.22	4.46	protein	326-345 aa	345				Col_cuticle_N [PF01484.16]; Collagen [PF01391.17]	hermaphrodite genitalia development [GO:0040035]; structural constituent of cuticle [GO:0042302]	Collagens (type IV and type XIII), and related proteins [KOG3544]	TM(1x)		SEG: 0.52 (181/345)	3.57	0.8	0.73	0.8	3.57	0.8	3.57	3.57	3.57	67.98	22.84	16.51	22.15	22.84	11.08
WBGene00000606	F11G11.10	col-17	0.07	0.23	0.01	0.07	0.01	0.01	0.01	0.23	0.04	0.03	0.03	0.01	0	0	0	6.1	0.16	0.14	0.11	6.1	protein	277 aa	277					body morphogenesis [GO:0010171]	Collagens (type IV and type XIII), and related proteins [KOG3544]	SigP		SEG: 0.07 (19/277)	1.83	0.3	0.25	0.21	1.83	0.3	1.83	1.83	1.83	336.2	26.16	7.89	24.61	20.75	26.16
WBGene00000608	ZK1193.1	col-19	1.03	1.23	0.4	1.03	0.26	0.45	0.05	1.23	0.31	0.54	0.06	0.4	0.1	0.18	0.02	2.29	0.25	0.44	0.05	2.29	protein	289 aa	289				Col_cuticle_N [PF01484.16]; Collagen [PF01391.17]	alae of collagen and cuticulin-based cuticle extracellular matrix [GO:0060111]; annuli extracellular matrix [GO:0060107]; structural constituent of cuticle [GO:0042302]	Collagens (type IV and type XIII), and related proteins [KOG3544]	SigP		SEG: 0.46 (134/289)	2678.2	667.2	1170.35	121.98	2678.2	1170.35	2678.2	2678.2	2678.2	6684.87	2591.51	2176.52	1546.05	2591.51	1507.82
WBGene00000609	F11G11.11	col-20	0.49	0.75	0.34	0.49	0.16	0.23	0.09	0.75	0.25	0.36	0.14	0.34	0.11	0.16	0.06	2.09	0.33	0.48	0.19	2.09	protein	288 aa	288				Col_cuticle_N [PF01484.16]; Collagen [PF01391.17]	body morphogenesis [GO:0010171]; structural constituent of cuticle [GO:0042302]	Collagens (type IV and type XIII), and related proteins [KOG3544]	TM(1x)		SEG: 0.54 (155/288)	2259.79	748.42	1078.96	428.22	2259.79	1078.96	2259.79	2259.79	2259.79	6700.36	4633.56	3016.98	3240	4633.56	3045.4
WBGene00000610	F36A4.6	col-33	0.03	0.1	0.11	0.01	0.03	0.01	0.03	0.03	0.1	0.04	0.08	0.03	0.11	0.05	0.09	0.29	1.17	0.43	0.86	1.17	protein	304 aa	304				Col_cuticle_N [PF01484.16]; Collagen [PF01391.17]	structural constituent of cuticle [GO:0042302]	Collagens (type IV and type XIII), and related proteins [KOG3544]	TM(1x)		SEG: 0.63 (191/304)	0.02	0.07	0.03	0.06	0.07	0.07	0.06	0.07	0.07	0.65	2.05	0.73	2.05	1.39	0.4
WBGene00000611	F36A4.10	col-34	2.31	2.94	0.46	2.31	0.07	0.04	0.01	2.94	0.09	0.05	0.01	0.46	0.01	0.01	0	31.12	0.03	0.02	0	31.12	protein	299 aa	299				Col_cuticle_N [PF01484.16]; Collagen [PF01391.17]	body morphogenesis [GO:0010171]; locomotion [GO:0040011]; structural constituent of cuticle [GO:0042302]	Collagens (type IV and type XIII), and related proteins [KOG3544]	TM(1x)		SEG: 0.62 (186/299)	30.19	0.97	0.48	0.13	30.19	0.97	30.19	30.19	30.19	66.1	13.06	10.27	11.31	13.06	6.39
WBGene00000612	C15A11.1	col-35	0.12	0.57	1	0.03	0.09	0.06	0.12	0.14	0.43	0.29	0.57	0.25	0.75	0.5	1	0.25	0.75	0.5	1.33	1.33	protein	342 aa	342				Col_cuticle_N [PF01484.16]; Collagen [PF01391.17]	body morphogenesis [GO:0010171]; growth [GO:0040007]; locomotion [GO:0040011]; nematode larval development [GO:0002119]; oviposition [GO:0018991]; reproduction [GO:0000003]; structural constituent of cuticle [GO:0042302]		TM(1x)		SEG: 0.55 (188/342)	0.01	0.03	0.02	0.04	0.04	0.04	0.04	0.04	0.03	0.04	0.33	0.07	0.22	0.1	0.33
WBGene00000613	C27H5.5	col-36	30.82	6.78	5.7	0.14	30.82	0.18	3	0.03	6.78	0.04	0.66	0.03	5.7	0.03	0.55	0	10.27	0.01	0.1	10.27	protein	222-307 aa	307				Col_cuticle_N [PF01484.16]; Collagen [PF01391.17]	structural constituent of cuticle [GO:0042302]	Collagens (type IV and type XIII), and related proteins [KOG3544]	TM(1x)		SEG: 0.55 (170/307)	0.06	13.56	0.08	1.32	13.56	13.56	1.32	13.56	13.56	2.38	0.44	2	0.26	0.44	0.36
WBGene00000614	ZK863.2	col-37	11.16	6.42	0.62	5.63	11.16	1.74	4.95	3.24	6.42	1	2.85	0.31	0.62	0.1	0.28	0.5	1.98	0.16	0.44	1.98	protein	330 aa	330				Col_cuticle_N [PF01484.16]; Collagen [PF01391.17]	structural constituent of cuticle [GO:0042302]	Collagens (type IV and type XIII), and related proteins [KOG3544]	SigP		SEG: 0.57 (189/330)	1.07	2.12	0.33	0.94	2.12	2.12	1.07	2.12	2.12	3.41	0.19	0.33	0.08	0.19	0.05
WBGene00000615	F54C9.4	col-38	0	0	0.21	0	0	0	0	0	0	0	0	0.14	0.14	0.11	0.21	0.67	0.67	0.5	1.5	1.5	protein	287 aa	287				Col_cuticle_N [PF01484.16]; Collagen [PF01391.17]	body morphogenesis [GO:0010171]; structural constituent of cuticle [GO:0042302]	Collagens (type IV and type XIII), and related proteins [KOG3544]	SigP		SEG: 0.36 (103/287)	0.04	0.04	0.03	0.06	0.06	0.06	0.06	0.06	0.04	0.28	35.52	18.3	35.52	21.19	12.2
WBGene00000616	C09G5.4	col-39	0.57	0.54	0.01	0.57	0.33	0.34	0.13	0.54	0.31	0.32	0.12	0.01	0.01	0.01	0	1.68	0.58	0.59	0.22	1.68	protein	323 aa	323				Col_cuticle_N [PF01484.16]; Collagen [PF01391.17]	collagen and cuticulin-based cuticle development [GO:0040002]; structural constituent of cuticle [GO:0042302]	Collagens (type IV and type XIII), and related proteins [KOG3544]	TM(1x)		SEG: 0.57 (183/323)	16.32	9.41	9.7	3.66	16.32	9.7	16.32	16.32	16.32	1287.56	28.88	30.02	15.36	28.88	17
WBGene00000617	T13B5.4	col-40	1.3	9.97	6.07	0.98	0.2	1.3	0.12	7.5	1.57	9.97	0.95	4.57	0.95	6.07	0.58	0.75	0.16	1.33	0.09	1.33	protein	302 aa	302				Col_cuticle_N [PF01484.16]; Collagen [PF01391.17]	structural constituent of cuticle [GO:0042302]	Collagens (type IV and type XIII), and related proteins [KOG3544]; Structural constituent of cuticle protein [meNOG33432]	TM(1x)		SEG: 0.63 (190/302)	6.9	1.44	9.17	0.87	9.17	9.17	9.17	6.9	9.17	1.51	7.05	0.92	7.05	4.68	4.04
WBGene00000618	T10B10.1	col-41	0.09	0.24	0.04	0.09	0	0.01	0	0.24	0.01	0.02	0.01	0.04	0	0	0	12.5	0.03	0.08	0.05	12.5	protein	428 aa	428				Col_cuticle_N [PF01484.16]; Collagen [PF01391.17]	structural constituent of cuticle [GO:0042302]	Collagens (type IV and type XIII), and related proteins [KOG3544]	SigP		SEG: 0.39 (165/428)	0.75	0.02	0.06	0.04	0.75	0.06	0.75	0.75	0.75	16.83	8.14	3.1	4.88	6.33	8.14
WBGene00000620	ZC513.8	col-43	5.8	3.63	0.96	5.8	5.22	2.44	3.76	3.63	3.27	1.53	2.35	0.96	0.87	0.41	0.63	1.11	0.9	0.42	0.65	1.11	protein	303 aa	303				Col_cuticle_N [PF01484.16]; Collagen [PF01391.17]	structural constituent of cuticle [GO:0042302]	Collagens (type IV and type XIII), and related proteins [KOG3544]	TM(1x)		SEG: 0.54 (163/303)	11.25	10.13	4.73	7.29	11.25	10.13	11.25	11.25	11.25	11.66	1.94	3.1	1.63	1.94	1.29
WBGene00000621	F54B11.2	col-44	0.38	1	0.23	0.38	0.11	0.15	0.33	1	0.29	0.4	0.86	0.23	0.06	0.09	0.19	1.17	0.29	0.4	0.86	1.17	protein	304 aa	304				Col_cuticle_N [PF01484.16]; Collagen [PF01391.17]	body morphogenesis [GO:0010171]; locomotion [GO:0040011]; structural constituent of cuticle [GO:0042302]	Collagens (type IV and type XIII), and related proteins [KOG3544]	TM(1x)		SEG: 0.62 (190/304)	0.35	0.1	0.14	0.3	0.35	0.3	0.35	0.35	0.35	1.54	0.92	0.35	0.37	0.92	0.32
WBGene00000622	F53G12.7	col-45	0.02	0.27	1.2	0.01	0.01	0.01	0.02	0.09	0.16	0.11	0.27	0.4	0.7	0.5	1.2	0.33	0.58	0.42	1.71	1.71	protein	258-327 aa	327				Col_cuticle_N [PF01484.16]; Collagen [PF01391.17]	structural constituent of cuticle [GO:0042302]	Collagens (type IV and type XIII), and related proteins [KOG3544]	TM(1x)		SEG: 0.47 (120/258)	0.04	0.07	0.05	0.12	0.12	0.12	0.12	0.12	0.07	0.1	7.41	0.45	7.41	7.35	5.06
WBGene00000623	Y18H1A.13	col-46	0.11	0.1	1	0.04	0.07	0.04	0.11	0.04	0.06	0.04	0.1	0.4	0.6	0.4	1	0.4	0.6	0.4	1.67	1.67	protein	301 aa	301				Collagen [PF01391.17]		Collagens (type IV and type XIII), and related proteins [KOG3544]	TM(1x)		SEG: 0.17 (52/301)	0.02	0.03	0.02	0.05	0.05	0.05	0.05	0.05	0.03	0.05	0.45	0.5	0.35	0.45	0.44
WBGene00000624	Y18H1A.12	col-47	0.41	0.44	0.67	0.15	0.26	0.18	0.41	0.16	0.28	0.19	0.44	0.24	0.43	0.29	0.67	0.36	0.64	0.43	1.56	1.56	protein	172-234 aa	234				Collagen [PF01391.17]					SEG: 0.34 (59/172)	0.05	0.09	0.06	0.14	0.14	0.14	0.14	0.14	0.09	0.21	0.34	0.32	0.2	0.2	0.34
WBGene00000625	Y54E10BL.2	col-48	0.01	0.02	0	0	0	0	0.01	0.01	0.01	0	0.02	0	0	0	0	0.31	0.31	0.23	3.25	3.25	protein	285 aa	285				Col_cuticle_N [PF01484.16]; Collagen [PF01391.17]	embryo development ending in birth or egg hatching [GO:0009792]; hermaphrodite genitalia development [GO:0040035]; nematode larval development [GO:0002119]; reproduction [GO:0000003]; structural constituent of cuticle [GO:0042302]	Collagens (type IV and type XIII), and related proteins [KOG3544]	TM(1x)		SEG: 0.56 (160/285)	0.04	0.04	0.03	0.13	0.13	0.13	0.13	0.13	0.04	41.53	19.54	6.77	19.54	11.68	6.58
WBGene00000626	K09H9.3	col-49	0.1	0.23	0	0.1	0	0	0	0.23	0	0	0.01	0	0	0	0	31.67	0.02	0.02	0.03	31.67	protein	283 aa	283				Col_cuticle_N [PF01484.16]; Collagen [PF01391.17]	structural constituent of cuticle [GO:0042302]	Collagens (type IV and type XIII), and related proteins [KOG3544]	SigP		SEG: 0.23 (64/283)	1.9	0.04	0.03	0.06	1.9	0.06	1.9	1.9	1.9	456.2	18.12	8.11	18.12	12.06	5
WBGene00000627	T28F2.6	col-50	0.03	0.14	0.27	0.01	0.02	0.02	0.03	0.03	0.07	0.07	0.14	0.07	0.13	0.13	0.27	0.25	0.5	0.5	2	2	protein	418 aa	418				Col_cuticle_N [PF01484.16]; Collagen [PF01391.17]	structural constituent of cuticle [GO:0042302]	Collagens (type IV and type XIII), and related proteins [KOG3544]	TM(1x)		SEG: 0.70 (291/418)	0.01	0.02	0.02	0.04	0.04	0.04	0.04	0.04	0.02	0.15	1.19	0.29	1.19	1.02	1.19
WBGene00000628	T28F2.8	col-51	0.15	0.15	0.1	0.15	0.06	0.06	0.12	0.15	0.06	0.06	0.12	0.1	0.04	0.04	0.08	1.25	0.4	0.4	0.8	1.25	protein	422 aa	422				Col_cuticle_N [PF01484.16]	structural constituent of cuticle [GO:0042302]		TM(1x)		SEG: 0.76 (322/422)	0.05	0.02	0.02	0.04	0.05	0.04	0.05	0.05	0.05	0.49	0.34	0.34	0.09	0.34	0.23
WBGene00000629	D1007.2	col-52	0.67	0.38	1	0.44	0.44	0.33	0.67	0.25	0.25	0.19	0.38	0.67	0.67	0.5	1	0.67	0.67	0.5	1.5	1.5	protein	260 aa	260				Collagen [PF01391.17]					SEG: 0.29 (75/260)	0.04	0.04	0.03	0.06	0.06	0.06	0.06	0.06	0.04	0.06	0.09	0.16	0.09	0.04	0.09
WBGene00000630	M01A12.1	col-53	0.04	0.05	0.07	0.01	0.02	0.02	0.04	0.01	0.03	0.02	0.05	0.02	0.04	0.03	0.07	0.29	0.57	0.43	1.75	1.75	protein	278 aa	278				Collagen [PF01391.17]		Collagens (type IV and type XIII), and related proteins [KOG3544]; Extracellular matrix structural constituent protein [meNOG00395]	TM(1x)		SEG: 0.06 (16/278)	0.02	0.04	0.03	0.07	0.07	0.07	0.07	0.07	0.04	1.04	1.94	1.42	1.87	1.94	1.91
WBGene00000631	F33D11.3	col-54	0.06	0.09	0.01	0.02	0.04	0.03	0.06	0.03	0.06	0.05	0.09	0	0.01	0.01	0.01	0.33	0.67	0.5	1.5	1.5	protein	281 aa	281				Col_cuticle_N [PF01484.16]; Collagen [PF01391.17]	defense response [GO:0006952]; structural constituent of cuticle [GO:0042302]	Collagens (type IV and type XIII), and related proteins [KOG3544]	TM(1x)		SEG: 0.38 (107/281)	0.02	0.04	0.03	0.06	0.06	0.06	0.06	0.06	0.04	5.67	0.99	0.66	0.56	0.7	0.99
WBGene00000632	T05E7.2	col-55	0.58	0.46	0.58	0.21	0.37	0.47	0.58	0.17	0.29	0.38	0.46	0.21	0.37	0.47	0.58	0.36	0.64	0.82	1.22	1.22	protein	208 aa	208				Col_cuticle_N [PF01484.16]; Collagen [PF01391.17]	structural constituent of cuticle [GO:0042302]	Collagens (type IV and type XIII), and related proteins [KOG3544]	TM(1x)		SEG: 0.48 (99/208)	0.04	0.07	0.09	0.11	0.11	0.11	0.11	0.11	0.09	0.19	0.19	0.24	0.07	0.19	0.07
WBGene00000633	T08B2.2	col-56	0.27	0.6	1.2	0.09	0.18	0.09	0.27	0.2	0.4	0.2	0.6	0.4	0.8	0.4	1.2	0.33	0.67	0.33	1.5	1.5	protein	321 aa	321				Collagen [PF01391.17]		Collagens (type IV and type XIII), and related proteins [KOG3544]	TM(1x)		SEG: 0.50 (160/321)	0.02	0.04	0.02	0.06	0.06	0.06	0.06	0.06	0.04	0.05	0.22	0.1	0.08	0.15	0.22
WBGene00000634	F26B1.4	col-58	0.04	0.06	0.02	0.03	0.03	0.01	0.04	0.04	0.04	0.02	0.06	0.01	0.01	0.01	0.02	0.67	0.67	0.33	1.5	1.5	protein	289 aa	289				Col_cuticle_N [PF01484.16]; Collagen [PF01391.17]	structural constituent of cuticle [GO:0042302]	Collagens (type IV and type XIII), and related proteins [KOG3544]	TM(1x)		SEG: 0.44 (127/289)	0.04	0.04	0.02	0.06	0.06	0.06	0.06	0.06	0.04	3.18	1.38	1.01	0.54	1.38	0.99
WBGene00000636	F22D6.10	col-60	0.04	0.04	0	0.04	0	0	0.01	0.04	0	0	0	0	0	0	0	8.2	0.07	0.1	0.12	8.2	protein	302 aa	302				Col_cuticle_N [PF01484.16]; Collagen [PF01391.17]	structural constituent of cuticle [GO:0042302]	Collagens (type IV and type XIII), and related proteins [KOG3544]	TM(1x)		SEG: 0.28 (86/302)	0.41	0.03	0.04	0.05	0.41	0.05	0.41	0.41	0.41	403.93	9.66	11.35	4.92	9.66	2.93
WBGene00000637	C01H6.1	col-61	0.09	0.11	0.1	0.03	0.06	0.03	0.09	0.04	0.07	0.04	0.11	0.03	0.06	0.03	0.1	0.33	0.67	0.33	1.5	1.5	protein	307 aa	307				Col_cuticle_N [PF01484.16]; Collagen [PF01391.17]	structural constituent of cuticle [GO:0042302]	Collagens (type IV and type XIII), and related proteins [KOG3544]; Structural constituent of cuticle protein [meNOG15112]	TM(1x)		SEG: 0.28 (86/307)	0.02	0.04	0.02	0.06	0.06	0.06	0.06	0.06	0.04	0.63	0.67	0.55	0.46	0.67	0.52
WBGene00000638	C15A11.6	col-62	0	0.01	0.01	0	0	0	0	0.01	0	0	0	0.01	0	0	0	2	0.42	0.25	0.5	2	protein	316 aa	316				Col_cuticle_N [PF01484.16]; Collagen [PF01391.17]	embryo development ending in birth or egg hatching [GO:0009792]; structural constituent of cuticle [GO:0042302]	Collagens (type IV and type XIII), and related proteins [KOG3544]	TM(1x)		SEG: 0.58 (182/316)	0.12	0.05	0.03	0.06	0.12	0.06	0.12	0.12	0.12	18.97	30.74	12.54	10.63	30.74	6.81
WBGene00000639	ZK265.2	col-63	0	0.01	0.05	0	0	0	0	0.01	0.01	0.01	0.01	0.04	0.04	0.03	0.05	0.75	0.75	0.5	1.33	1.33	protein	381 aa	381				Col_cuticle_N [PF01484.16]; Collagen [PF01391.17]	structural constituent of cuticle [GO:0042302]	Collagens (type IV and type XIII), and related proteins [KOG3544]	TM(1x)		SEG: 0.51 (195/381)	0.03	0.03	0.02	0.04	0.04	0.04	0.04	0.04	0.03	0.73	19.78	3.27	19.78	3.35	3.91
WBGene00000640	F52F12.2	col-64	0.03	0.05	0.56	0.01	0.02	0.01	0.03	0.02	0.03	0.02	0.05	0.22	0.33	0.22	0.56	0.4	0.6	0.4	1.67	1.67	protein	370 aa	370				Col_cuticle_N [PF01484.16]; Collagen [PF01391.17]	structural constituent of cuticle [GO:0042302]	Collagens (type IV and type XIII), and related proteins [KOG3544]	TM(1x)		SEG: 0.43 (159/370)	0.02	0.03	0.02	0.05	0.05	0.05	0.05	0.05	0.03	0.09	1.72	0.92	1.72	1.69	0.63
WBGene00000641	K08C9.4	col-65	0.1	0.15	0.01	0.1	0	0	0.01	0.15	0.01	0	0.01	0.01	0	0	0	14.5	0.05	0.02	0.07	14.5	protein	301 aa	301				Col_cuticle_N [PF01484.16]; Collagen [PF01391.17]	structural constituent of cuticle [GO:0042302]	Collagens (type IV and type XIII), and related proteins [KOG3544]	SigP		SEG: 0.48 (144/301)	0.87	0.04	0.02	0.06	0.87	0.06	0.87	0.87	0.87	58.96	8.47	5.75	4.43	8.47	4.07
WBGene00000644	C50D2.4	col-68	0.02	0.05	0.08	0.01	0.02	0	0.01	0.03	0.05	0.01	0.03	0.04	0.08	0.02	0.04	0.56	1.8	0.22	0.56	1.8	protein	329 aa	329				Col_cuticle_N [PF01484.16]; Collagen [PF01391.17]	structural constituent of cuticle [GO:0042302]	Collagens (type IV and type XIII), and related proteins [KOG3544]	TM(1x)		SEG: 0.49 (161/329)	0.05	0.09	0.02	0.05	0.09	0.09	0.05	0.09	0.09	1.12	5.73	1.82	4.01	5.73	3.45
WBGene00000645	K01A2.7	col-69	0.01	0.14	1	0.01	0.01	0.01	0.01	0.07	0.1	0.07	0.14	0.5	0.75	0.5	1	0.5	0.75	0.5	1.33	1.33	protein	394 aa	394				Col_cuticle_N [PF01484.16]; Collagen [PF01391.17]	structural constituent of cuticle [GO:0042302]	Collagens (type IV and type XIII), and related proteins [KOG3544]	TM(1x)		SEG: 0.37 (144/394)	0.02	0.03	0.02	0.04	0.04	0.04	0.04	0.04	0.03	0.04	2.96	0.29	2.1	2.96	2.13
WBGene00000646	H17B01.2	col-70	0.38	0.03	0.01	0.12	0.25	0.12	0.38	0.01	0.02	0.01	0.03	0	0.01	0	0.01	0.33	0.67	0.33	1.5	1.5	protein	530 aa	530						Unnamed protein [LSE1097]		NCoils: 0.04 (21/530)	SEG: 0.37 (196/530)	0.01	0.02	0.01	0.03	0.03	0.03	0.03	0.03	0.02	3.58	0.08	1.14	0.08	0.05	0.03
WBGene00000647	Y49F6B.10	col-71	0.02	0.04	0	0.02	0	0.01	0	0.04	0.01	0.02	0	0	0	0	0	1.64	0.24	0.61	0.07	1.64	protein	371 aa	371				Col_cuticle_N [PF01484.16]; Collagen [PF01391.17]	structural constituent of cuticle [GO:0042302]	Collagens (type IV and type XIII), and related proteins [KOG3544]	TM(1x)		SEG: 0.31 (114/371)	0.54	0.13	0.33	0.04	0.54	0.33	0.54	0.54	0.54	182.97	33.58	14.44	33.58	23.91	11.07
WBGene00000648	W09G10.1	col-72	0.69	0.9	1.12	0.23	0.42	0.31	0.69	0.3	0.55	0.4	0.9	0.38	0.69	0.5	1.12	0.33	0.61	0.44	1.64	1.64	protein	168-288 aa	288				Collagen [PF01391.17]		Collagens (type IV and type XIII), and related proteins [KOG3544]	TM(1x)		SEG: 0.55 (92/168)	0.06	0.11	0.08	0.18	0.18	0.18	0.18	0.18	0.11	0.16	0.26	0.2	0.12	0.15	0.26
WBGene00000649	F11G11.12	col-73	0.32	0.59	0.04	0.32	0.01	0.01	0.01	0.59	0.02	0.02	0.02	0.04	0	0	0	28.7	0.03	0.03	0.03	28.7	protein	285 aa	285				Col_cuticle_N [PF01484.16]; Collagen [PF01391.17]	body morphogenesis [GO:0010171]; structural constituent of cuticle [GO:0042302]	Collagens (type IV and type XIII), and related proteins [KOG3544]	TM(1x)		SEG: 0.47 (134/285)	18.37	0.61	0.64	0.47	18.37	0.64	18.37	18.37	18.37	416.3	57.54	31.05	57.54	46.01	27.95
WBGene00000650	ZK1248.2	col-74	0.01	0.01	1	0.01	0.01	0.01	0.01	0	0.01	0	0.01	0.4	0.6	0.4	1	0.4	0.6	0.4	1.67	1.67	protein	329 aa	329				Col_cuticle_N [PF01484.16]; Collagen [PF01391.17]	structural constituent of cuticle [GO:0042302]		TM(1x)		SEG: 0.44 (145/329)	0.02	0.03	0.02	0.05	0.05	0.05	0.05	0.05	0.03	0.05	3.7	4.16	1.48	1.7	3.7
WBGene00000651	K03H9.2	col-75	0.17	0.86	1.2	0.06	0.11	0.08	0.17	0.29	0.57	0.43	0.86	0.4	0.8	0.6	1.2	0.33	0.67	0.5	1.5	1.5	protein	285 aa	285				Col_cuticle_N [PF01484.16]; Collagen [PF01391.17]		Collagens (type IV and type XIII), and related proteins [KOG3544]	TM(1x)	NCoils: 0.09 (25/285)	SEG: 0.27 (77/285)	0.02	0.04	0.03	0.06	0.06	0.06	0.06	0.06	0.04	0.05	0.36	0.07	0.34	0.27	0.36
WBGene00000652	M110.1	col-76	0	0	0.09	0	0	0	0	0	0	0	0	0.03	0.06	0.03	0.09	0.33	0.67	0.33	1.5	1.5	protein	499 aa	499				Col_cuticle_N [PF01484.16]; Collagen [PF01391.17]	structural constituent of cuticle [GO:0042302]	Collagens (type IV and type XIII), and related proteins [KOG3544]	TM(1x)		SEG: 0.21 (106/499)	0.01	0.02	0.01	0.03	0.03	0.03	0.03	0.03	0.02	0.35	14.46	9.13	10.67	13.96	14.46
WBGene00000653	M195.1	col-77	0.54	0.52	0.02	0.54	0.01	0.02	0.01	0.52	0.01	0.02	0.01	0.02	0	0	0	22.22	0.01	0.04	0.01	22.22	protein	304 aa	304				Col_cuticle_N [PF01484.16]; Collagen [PF01391.17]	structural constituent of cuticle [GO:0042302]	Collagens (type IV and type XIII), and related proteins [KOG3544]	TM(1x)		SEG: 0.60 (181/304)	16.89	0.2	0.76	0.17	16.89	0.76	16.89	16.89	16.89	859.75	31.07	32.22	29.63	31.07	10.89
WBGene00000654	W07A12.5	col-78	0.7	0.44	1.17	0.2	0.4	0.3	0.7	0.12	0.25	0.19	0.44	0.33	0.67	0.5	1.17	0.29	0.57	0.43	1.75	1.75	protein	278 aa	278				Collagen [PF01391.17]		Collagens (type IV and type XIII), and related proteins [KOG3544]	TM(1x)		SEG: 0.33 (91/278)	0.02	0.04	0.03	0.07	0.07	0.07	0.07	0.07	0.04	0.06	0.1	0.16	0.1	0.09	0.05
WBGene00000655	C09G5.3	col-79	96.51	287.34	0.51	48.35	24.89	96.51	16.99	143.95	74.11	287.34	50.59	0.25	0.13	0.51	0.09	0.5	0.26	2	0.18	2	protein	283 aa	283				Col_cuticle_N [PF01484.16]; Collagen [PF01391.17]	collagen and cuticulin-based cuticle development [GO:0040002]; structural constituent of cuticle [GO:0042302]	Collagens (type IV and type XIII), and related proteins [KOG3544]	TM(1x)		SEG: 0.37 (104/283)	63.34	32.61	126.43	22.26	126.43	126.43	126.43	63.34	126.43	249.39	1.31	0.44	1.31	0.37	0.99
WBGene00000656	C09G5.5	col-80	0.39	0.36	0.34	0.39	0.12	0.21	0.11	0.36	0.1	0.19	0.1	0.34	0.1	0.18	0.1	1.91	0.29	0.52	0.29	1.91	protein	317 aa	317	Housekeeping			Col_cuticle_N [PF01484.16]; Collagen [PF01391.17]	collagen and cuticulin-based cuticle development [GO:0040002]; structural constituent of cuticle [GO:0042302]	Collagens (type IV and type XIII), and related proteins [KOG3544]	TM(1x)		SEG: 0.67 (213/317)	684.01	201.55	358.24	195.22	684.01	358.24	684.01	684.01	684.01	2014.22	1737.78	1926.03	1132.31	1737.78	1069.36
WBGene00000657	F38A3.1	col-81	1.06	0.69	0.14	1.06	0.42	0.79	0.13	0.69	0.27	0.51	0.09	0.14	0.06	0.11	0.02	1.35	0.39	0.74	0.13	1.35	protein	306 aa	306				Col_cuticle_N [PF01484.16]; Collagen [PF01391.17]	structural constituent of cuticle [GO:0042302]	Collagens (type IV and type XIII), and related proteins [KOG3544]	TM(1x)		SEG: 0.55 (168/306)	549.93	217.2	407.61	69.38	549.93	407.61	549.93	549.93	549.93	3859.87	516.39	800.84	148.9	516.39	159.08
WBGene00000658	F33A8.9	col-83	0.17	0.2	0.5	0.07	0.1	0.07	0.17	0.08	0.12	0.08	0.2	0.2	0.3	0.2	0.5	0.4	0.6	0.4	1.67	1.67	protein	346 aa	346				Col_cuticle_N [PF01484.16]; Collagen [PF01391.17]	structural constituent of cuticle [GO:0042302]	Collagens (type IV and type XIII), and related proteins [KOG3544]	TM(1x)		SEG: 0.42 (144/346)	0.02	0.03	0.02	0.05	0.05	0.05	0.05	0.05	0.03	0.1	0.3	0.25	0.3	0.17	0.12
WBGene00000659	K12D12.3	col-84	0.33	0.24	0.84	0.04	0.33	0.04	0.1	0.03	0.24	0.03	0.08	0.11	0.84	0.11	0.26	0.12	3.2	0.12	0.31	3.2	protein	333 aa	333				Col_cuticle_N [PF01484.16]; Collagen [PF01391.17]	body morphogenesis [GO:0010171]; embryo development ending in birth or egg hatching [GO:0009792]; nematode larval development [GO:0002119]; reproduction [GO:0000003]; structural constituent of cuticle [GO:0042302]	Collagens (type IV and type XIII), and related proteins [KOG3544]	SigP		SEG: 0.44 (148/333)	0.02	0.16	0.02	0.05	0.16	0.16	0.05	0.16	0.16	0.19	0.49	0.66	0.49	0.14	0.31
WBGene00000660	T21B4.2	col-85	4.93	4.23	1	4.93	1.04	2.53	0.88	4.23	0.89	2.17	0.76	1	0.21	0.51	0.18	1.95	0.21	0.51	0.18	1.95	protein	312 aa	312				Col_cuticle_N [PF01484.16]; Collagen [PF01391.17]	structural constituent of cuticle [GO:0042302]	Collagens (type IV and type XIII), and related proteins [KOG3544]	TM(1x)		SEG: 0.70 (217/312)	9.61	2.03	4.93	1.72	9.61	4.93	9.61	9.61	9.61	9.62	1.95	2.27	1.95	1.89	1.13
WBGene00000661	Y81G3A.5	col-86	0.56	0.44	1.17	0.2	0.32	0.24	0.56	0.16	0.25	0.19	0.44	0.42	0.67	0.5	1.17	0.36	0.57	0.43	1.75	1.75	protein	178-323 aa	323				Col_cuticle_N [PF01484.16]; Collagen [PF01391.17]	structural constituent of cuticle [GO:0042302]	Collagens (type IV and type XIII), and related proteins [KOG3544]	TM(1x)		SEG: 0.63 (113/178)	0.05	0.08	0.06	0.14	0.14	0.14	0.14	0.14	0.08	0.12	0.25	0.32	0.1	0.22	0.25
WBGene00000662	Y39G8C.4	col-87	0.21	0.38	1	0.07	0.14	0.07	0.21	0.12	0.25	0.12	0.38	0.33	0.67	0.33	1	0.33	0.67	0.33	1.5	1.5	protein	548 aa	548				Collagen [PF01391.17]		Collagens (type IV and type XIII), and related proteins [KOG3544]	TM(1x)		SEG: 0.51 (277/548)	0.01	0.02	0.01	0.03	0.03	0.03	0.03	0.03	0.02	0.03	0.14	0.08	0.05	0.1	0.14
WBGene00000663	W05G11.3	col-88	1.19	1	0.03	1.19	0.4	0.18	0.01	1	0.34	0.15	0.01	0.03	0.01	0	0	2.95	0.34	0.15	0.01	2.95	protein	302 aa	302				Col_cuticle_N [PF01484.16]; Collagen [PF01391.17]	structural constituent of cuticle [GO:0042302]	Collagens (type IV and type XIII), and related proteins [KOG3544]	TM(1x)		SEG: 0.42 (128/302)	20.88	7.07	3.12	0.12	20.88	7.07	20.88	20.88	20.88	645.67	17.62	20.9	3.53	17.62	3.91
WBGene00000664	F17C8.2	col-89	0.05	0.12	0.03	0.05	0.02	0.01	0.01	0.12	0.04	0.02	0.03	0.03	0.01	0.01	0.01	3	0.33	0.21	0.25	3	protein	296 aa	296				Col_cuticle_N [PF01484.16]; Collagen [PF01391.17]	structural constituent of cuticle [GO:0042302]	Collagens (type IV and type XIII), and related proteins [KOG3544]	SigP		SEG: 0.51 (150/296)	0.24	0.08	0.05	0.06	0.24	0.08	0.24	0.24	0.24	8.69	5.28	2.07	3.89	5.28	3.75
WBGene00000665	C29E4.1	col-90	0.03	0.07	0.02	0.03	0	0	0.01	0.07	0.01	0.01	0.01	0.02	0	0	0	6.4	0.12	0.12	0.16	6.4	protein	305 aa	305				Col_cuticle_N [PF01484.16]; Collagen [PF01391.17]	body morphogenesis [GO:0010171]; structural constituent of cuticle [GO:0042302]	Collagens (type IV and type XIII), and related proteins [KOG3544]	TM(1x)		SEG: 0.13 (41/305)	0.32	0.04	0.04	0.05	0.32	0.05	0.32	0.32	0.32	16.44	9.85	4.41	8.5	8.65	9.85
WBGene00000666	F09G8.6	col-91	35.84	32.41	0.07	35.84	0.55	2.55	1.11	32.41	0.5	2.3	1	0.07	0	0.01	0	14.08	0.02	0.07	0.03	14.08	protein	278 aa	278				Col_cuticle_N [PF01484.16]; Collagen [PF01391.17]	structural constituent of cuticle [GO:0042302]	Collagens (type IV and type XIII), and related proteins [KOG3544]	TM(1x)		SEG: 0.56 (156/278)	310.77	4.77	22.07	9.62	310.77	22.07	310.77	310.77	310.77	4243.35	8.67	9.59	1.64	8.67	2.7
WBGene00000667	W05B2.6	col-92	1.61	1.38	0.35	1.61	0.36	0.26	0.63	1.38	0.3	0.22	0.54	0.35	0.08	0.06	0.14	2.58	0.22	0.16	0.39	2.58	protein	304 aa	304	Housekeeping			Col_cuticle_N [PF01484.16]; Collagen [PF01391.17]	body morphogenesis [GO:0010171]; defense response [GO:0006952]; determination of adult lifespan [GO:0008340]; locomotion [GO:0040011]; nematode larval development [GO:0002119]; structural constituent of cuticle [GO:0042302]	Collagens (type IV and type XIII), and related proteins [KOG3544]	TM(1x)		SEG: 0.66 (200/304)	570.2	125.42	90.94	221.23	570.2	221.23	570.2	570.2	570.2	1613.71	353.08	412.22	124.56	353.08	101.75
WBGene00000668	W05B2.5	col-93	0.87	0.76	0.52	0.87	0.21	0.27	0.14	0.76	0.18	0.24	0.12	0.52	0.12	0.16	0.08	3.17	0.24	0.32	0.16	3.17	protein	304 aa	304	Housekeeping			Col_cuticle_N [PF01484.16]; Collagen [PF01391.17]	body morphogenesis [GO:0010171]; defense response [GO:0006952]; determination of adult lifespan [GO:0008340]; locomotion [GO:0040011]; nematode larval development [GO:0002119]; structural constituent of cuticle [GO:0042302]	Collagens (type IV and type XIII), and related proteins [KOG3544]	TM(1x)		SEG: 0.66 (200/304)	1943.82	459.22	613.31	307.23	1943.82	613.31	1943.82	1943.82	1943.82	3720.11	2234.47	2561.21	1258.18	2234.47	1269.79
WBGene00000669	W05B2.1	col-94	1.6	1.77	1.12	1.6	0.78	0.43	0.31	1.77	0.86	0.48	0.35	1.12	0.54	0.3	0.22	2.06	0.49	0.27	0.2	2.06	protein	304 aa	304				Col_cuticle_N [PF01484.16]; Collagen [PF01391.17]	body morphogenesis [GO:0010171]; defense response [GO:0006952]; determination of adult lifespan [GO:0008340]; locomotion [GO:0040011]; nematode larval development [GO:0002119]; structural constituent of cuticle [GO:0042302]	Collagens (type IV and type XIII), and related proteins [KOG3544]	TM(1x)		SEG: 0.61 (184/304)	565.09	274.19	152.48	111.14	565.09	274.19	565.09	565.09	565.09	503.89	353.45	318.55	148.14	353.45	120.47
WBGene00000670	Y41C4A.16	col-95	0.13	0.21	1.48	0.13	0.02	0.01	0	0.21	0.03	0.02	0.01	1.48	0.23	0.11	0.04	6.3	0.16	0.07	0.03	6.3	protein	309 aa	309				Col_cuticle_N [PF01484.16]; Collagen [PF01391.17]	structural constituent of cuticle [GO:0042302]	Collagens (type IV and type XIII), and related proteins [KOG3544]	TM(1x)		SEG: 0.61 (188/309)	108.56	17.22	7.81	3.19	108.56	17.22	108.56	108.56	108.56	73.51	831.72	513.25	817.58	381.2	831.72
WBGene00000671	Y41C4A.19	col-96	9.76	2.23	2.57	0.97	0.03	9.76	0.26	0.22	0.01	2.23	0.06	0.26	0.01	2.57	0.07	0.1	0	10.04	0.03	10.04	protein	289 aa	289				Col_cuticle_N [PF01484.16]; Collagen [PF01391.17]	structural constituent of cuticle [GO:0042302]	Collagens (type IV and type XIII), and related proteins [KOG3544]	TM(1x)		SEG: 0.64 (186/289)	10.43	0.35	104.73	2.76	104.73	104.73	104.73	10.43	104.73	40.7	10.73	47.01	10.73	8.77	9.87
WBGene00000672	ZK1010.7	col-97	1.59	2.57	0.03	1.59	0.14	0.09	0.06	2.57	0.22	0.15	0.1	0.03	0	0	0	11.56	0.09	0.06	0.04	11.56	protein	298 aa	298				Col_cuticle_N [PF01484.16]; Collagen [PF01391.17]	body morphogenesis [GO:0010171]; locomotion [GO:0040011]; structural constituent of cuticle [GO:0042302]	Collagens (type IV and type XIII), and related proteins [KOG3544]	TM(1x)		SEG: 0.49 (145/298)	40.36	3.49	2.38	1.55	40.36	3.49	40.36	40.36	40.36	1412.72	25.41	15.71	25.41	24.31	12.17
WBGene00000673	F14F7.1	col-98	0.32	0.51	0.51	0.26	0.04	0.32	0.06	0.4	0.06	0.51	0.1	0.4	0.06	0.51	0.1	0.8	0.12	1.26	0.2	1.26	protein	305 aa	305	Housekeeping			Col_cuticle_N [PF01484.16]; Collagen [PF01391.17]	body morphogenesis [GO:0010171]; locomotion [GO:0040011]; structural constituent of cuticle [GO:0042302]		TM(1x)		SEG: 0.57 (175/305)	316.69	48.18	397.75	77.74	397.75	397.75	397.75	316.69	397.75	787.59	1234.23	786.88	824.13	1234.23	770.9
WBGene00000674	F29C4.8	col-99	0.02	0.05	1	0.01	0.01	0.01	0.02	0.02	0.03	0.02	0.05	0.33	0.56	0.44	1	0.33	0.56	0.44	1.8	1.8	protein	683-716 aa	716				Collagen [PF01391.17]		Collagens (type IV and type XIII), and related proteins [KOG3544]; Extracellular matrix structural constituent protein [meNOG02181]	TM(1x)		SEG: 0.39 (263/683)	0.03	0.05	0.04	0.09	0.09	0.09	0.09	0.09	0.05	0.09	3.68	1.92	2.7	3.68	3.27
WBGene00000675	K02D7.3	col-101	0.34	0.43	0.48	0.34	0.15	0.06	0.05	0.43	0.19	0.08	0.06	0.48	0.22	0.09	0.07	2.21	0.45	0.18	0.15	2.21	protein	314-327 aa	327				Col_cuticle_N [PF01484.16]; Collagen [PF01391.17]	structural constituent of cuticle [GO:0042302]	Collagens (type IV and type XIII), and related proteins [KOG3544]	TM(1x)		SEG: 0.58 (181/314)	600.83	271.47	110.82	87.31	600.83	271.47	600.83	600.83	600.83	1247.09	1776.18	1411.22	1746.52	1504.15	1776.18
WBGene00000676	C18H7.3	col-102	0.87	0.69	0.26	0.87	0.3	0.13	0.17	0.69	0.24	0.1	0.14	0.26	0.09	0.04	0.05	2.86	0.35	0.15	0.2	2.86	protein	460 aa	460				Col_cuticle_N [PF01484.16]; Collagen [PF01391.17]	structural constituent of cuticle [GO:0042302]	Collagens (type IV and type XIII), and related proteins [KOG3544]	TM(1x)		SEG: 0.68 (313/460)	0.2	0.07	0.03	0.04	0.2	0.07	0.2	0.2	0.2	0.77	0.23	0.29	0.22	0.23	0.06
WBGene00000677	F56B3.1	col-103	1.39	1.95	1.35	1.39	0.65	0.34	0.18	1.95	0.91	0.48	0.25	1.35	0.64	0.33	0.17	2.13	0.47	0.25	0.13	2.13	protein	371 aa	371	Housekeeping			Col_cuticle_N [PF01484.16]	locomotion [GO:0040011]; striated muscle myosin thick filament assembly [GO:0071688]; structural constituent of cuticle [GO:0042302]	Collagens (type IV and type XIII), and related proteins [KOG3544]	SigP		SEG: 0.72 (266/371)	1585.69	745.5	391.09	203.46	1585.69	745.5	1585.69	1585.69	1585.69	1173.2	1139.56	814.85	823.73	1139.56	753.11
WBGene00000678	F58F6.1	col-104	0.25	0.36	0.04	0.25	0	0	0.01	0.36	0	0	0.01	0.04	0	0	0	33.43	0.01	0.01	0.03	33.43	protein	281 aa	281				Col_cuticle_N [PF01484.16]; Collagen [PF01391.17]	structural constituent of cuticle [GO:0042302]	Collagens (type IV and type XIII), and related proteins [KOG3544]	TM(1x)		SEG: 0.49 (137/281)	4.68	0.04	0.03	0.14	4.68	0.14	4.68	4.68	4.68	133.36	18.45	13.02	18.45	17.28	8.76
WBGene00000679	F58F6.2	col-105	0.47	0.47	1.17	0.13	0.27	0.2	0.47	0.13	0.27	0.2	0.47	0.33	0.67	0.5	1.17	0.29	0.57	0.43	1.75	1.75	protein	290 aa	290				Col_cuticle_N [PF01484.16]; Collagen [PF01391.17]	structural constituent of cuticle [GO:0042302]	Collagens (type IV and type XIII), and related proteins [KOG3544]	TM(1x)		SEG: 0.43 (126/290)	0.02	0.04	0.03	0.07	0.07	0.07	0.07	0.07	0.04	0.06	0.15	0.15	0.14	0.13	0.15
WBGene00000680	Y77E11A.15	col-106	1.97	2.39	1.06	1.97	0.5	1	0.13	2.39	0.61	1.21	0.16	1.06	0.27	0.54	0.07	1.97	0.26	0.51	0.07	1.97	protein	296 aa	296				Col_cuticle_N [PF01484.16]; Collagen [PF01391.17]	structural constituent of cuticle [GO:0042302]	Collagens (type IV and type XIII), and related proteins [KOG3544]	SigP		SEG: 0.52 (155/296)	3890.01	995.38	1975.12	262.57	3890.01	1975.12	3890.01	3890.01	3890.01	3659.92	1971.38	1626.31	1537.6	1971.38	1344.41
WBGene00000681	C34H4.4	col-107	0.47	0.92	0.03	0.47	0.2	0.03	0.08	0.92	0.4	0.05	0.15	0.03	0.01	0	0.01	2.31	0.43	0.06	0.17	2.31	protein	256-294 aa	294				Col_cuticle_N [PF01484.16]; Collagen [PF01391.17]	structural constituent of cuticle [GO:0042302]	Collagens (type IV and type XIII), and related proteins [KOG3544]	TM(1x)		SEG: 0.46 (135/294)	10.12	4.38	0.58	1.69	10.12	4.38	10.12	10.12	10.12	317.49	21.59	11.04	21.59	16.88	13.1
WBGene00000682	Y41D4A.2	col-108	5.47	3.59	2.6	5.47	2.47	0.84	0.68	3.59	1.62	0.55	0.45	2.6	1.17	0.4	0.33	2.21	0.45	0.15	0.12	2.21	protein	304 aa	304				Col_cuticle_N [PF01484.16]; Collagen [PF01391.17]	receptor-mediated endocytosis [GO:0006898]; structural constituent of cuticle [GO:0042302]	Collagens (type IV and type XIII), and related proteins [KOG3544]	TM(1x)		SEG: 0.58 (176/304)	1.04	0.47	0.16	0.13	1.04	0.47	1.04	1.04	1.04	0.4	0.19	0.29	0.14	0.16	0.19
WBGene00000683	Y38C1BA.3	col-109	2.6	7.97	0.02	2.6	0.01	0.05	0.01	7.97	0.02	0.15	0.02	0.02	0	0	0	51.99	0	0.02	0	51.99	protein	291 aa	291				Col_cuticle_N [PF01484.16]; Collagen [PF01391.17]	endoplasmic reticulum unfolded protein response [GO:0030968]; structural constituent of cuticle [GO:0042302]	Collagens (type IV and type XIII), and related proteins [KOG3544]	TM(1x)		SEG: 0.47 (137/291)	35.87	0.11	0.69	0.09	35.87	0.69	35.87	35.87	35.87	1903.18	13.81	4.5	13.81	8.41	5.91
WBGene00000684	F19C7.7	col-110	0.28	0.34	0.01	0.28	0.02	0.01	0.07	0.34	0.02	0.02	0.09	0.01	0	0	0	3.91	0.07	0.05	0.26	3.91	protein	304 aa	304				Col_cuticle_N [PF01484.16]; Collagen [PF01391.17]	body morphogenesis [GO:0010171]; locomotion [GO:0040011]; structural constituent of cuticle [GO:0042302]	Collagens (type IV and type XIII), and related proteins [KOG3544]	TM(1x)		SEG: 0.35 (106/304)	0.43	0.03	0.02	0.11	0.43	0.11	0.43	0.43	0.43	68.02	1.56	1.27	1.56	0.35	0.69
WBGene00000685	F29B9.9	col-111	0.06	0.18	0.01	0.06	0.03	0.01	0.04	0.18	0.09	0.04	0.13	0.01	0	0	0	1.44	0.5	0.23	0.69	1.44	protein	221-332 aa	332				Col_cuticle_N [PF01484.16]; Collagen [PF01391.17]	structural constituent of cuticle [GO:0042302]	Collagens (type IV and type XIII), and related proteins [KOG3544]	TM(1x)		SEG: 0.47 (104/221)	0.26	0.13	0.06	0.18	0.26	0.18	0.26	0.26	0.26	38.9	4.39	1.43	4.39	2.38	2.28
WBGene00000687	C34D4.15	col-113	0.04	0.1	0.03	0.04	0.01	0	0.01	0.1	0.02	0.01	0.03	0.03	0.01	0	0.01	3.5	0.17	0.11	0.29	3.5	protein	344-348 aa	348				Col_cuticle_N [PF01484.16]; Collagen [PF01391.17]	structural constituent of cuticle [GO:0042302]	Collagens (type IV and type XIII), and related proteins [KOG3544]	TM(1x)		SEG: 0.30 (106/348)	0.35	0.06	0.04	0.1	0.35	0.1	0.35	0.35	0.35	11	9.39	3.37	7.74	9.39	3.58
WBGene00000688	D2024.8	col-114	2.9	2.18	1.36	1.86	1	2.9	0.38	1.39	0.75	2.18	0.29	0.87	0.47	1.36	0.18	0.64	0.34	1.56	0.13	1.56	protein	321 aa	321				Col_cuticle_N [PF01484.16]; Collagen [PF01391.17]	body morphogenesis [GO:0010171]; locomotion [GO:0040011]; structural constituent of cuticle [GO:0042302]	Collagens (type IV and type XIII), and related proteins [KOG3544]	TM(1x)		SEG: 0.50 (160/321)	0.39	0.21	0.61	0.08	0.61	0.61	0.61	0.39	0.61	0.45	0.21	0.28	0.1	0.21	0.2
WBGene00000689	Y42H9B.1	col-115	0.04	0.1	0	0.01	0.02	0.02	0.04	0.03	0.05	0.05	0.1	0	0	0	0	0.25	0.5	0.5	2	2	protein	393 aa	393				Collagen [PF01391.17]		Collagens (type IV and type XIII), and related proteins [KOG3544]	TM(1x)		SEG: 0.40 (156/393)	0.01	0.02	0.02	0.04	0.04	0.04	0.04	0.04	0.02	15.03	0.9	0.39	0.71	0.86	0.9
WBGene00000690	F17E9.1	col-116	0.75	0.04	1.2	0.25	0.38	0.25	0.75	0.01	0.02	0.01	0.04	0.4	0.6	0.4	1.2	0.33	0.5	0.33	2	2	protein	313 aa	313				Col_cuticle_N [PF01484.16]; Collagen [PF01391.17]	structural constituent of cuticle [GO:0042302]	Collagens (type IV and type XIII), and related proteins [KOG3544]	SigP		SEG: 0.39 (123/313)	0.02	0.03	0.02	0.06	0.06	0.06	0.06	0.06	0.03	0.05	0.08	1.41	0.04	0.04	0.08
WBGene00000691	T28C6.4	col-117	0.97	1.41	0.12	0.97	0.22	0.01	0.26	1.41	0.31	0.02	0.38	0.12	0.03	0	0.03	3.72	0.22	0.01	0.27	3.72	protein	299 aa	299	Housekeeping			Col_cuticle_N [PF01484.16]; Collagen [PF01391.17]	body morphogenesis [GO:0010171]; lipid storage [GO:0019915]; locomotion [GO:0040011]; nematode larval development [GO:0002119]; receptor-mediated endocytosis [GO:0006898]; structural constituent of cuticle [GO:0042302]	Collagens (type IV and type XIII), and related proteins [KOG3544]	TM(1x)		SEG: 0.66 (196/299)	102.7	22.89	1.52	27.58	102.7	27.58	102.7	102.7	102.7	858.88	105.42	73.02	21.75	105.42	56.62
WBGene00000692	T11B7.3	col-118	2.73	0.28	0.2	2.73	0.02	0.18	0.09	0.28	0	0.02	0.01	0.2	0	0.01	0.01	15.22	0.01	0.07	0.03	15.22	protein	273-297 aa	297				Col_cuticle_N [PF01484.16]; Collagen [PF01391.17]	structural constituent of cuticle [GO:0042302]	Collagens (type IV and type XIII), and related proteins [KOG3544]	SigP		SEG: 0.41 (122/297)	9.89	0.07	0.65	0.31	9.89	0.65	9.89	9.89	9.89	48.48	3.62	35.32	2.18	3.62	2.67
WBGene00000693	C53B4.5	col-119	0.49	0.77	0.81	0.49	0.26	0.44	0.36	0.77	0.41	0.7	0.57	0.81	0.43	0.73	0.6	1.11	0.53	0.9	0.73	1.11	protein	289 aa	289				Col_cuticle_N [PF01484.16]; Collagen [PF01391.17]	lipid storage [GO:0019915]; structural constituent of cuticle [GO:0042302]	Collagens (type IV and type XIII), and related proteins [KOG3544]	TM(1x)		SEG: 0.53 (152/289)	2950.62	1567.52	2657.58	2167.99	2950.62	2657.58	2950.62	2950.62	2950.62	3638.05	6080.79	3810.31	3829.47	6080.79	4635.67
WBGene00000694	Y11D7A.11	col-120	0.11	0.08	0.01	0.11	0	0.11	0.01	0.08	0	0.07	0	0.01	0	0.01	0	1.03	0.03	0.97	0.06	1.03	protein	313 aa	313				Col_cuticle_N [PF01484.16]; Collagen [PF01391.17]	structural constituent of cuticle [GO:0042302]	Collagens (type IV and type XIII), and related proteins [KOG3544]	TM(1x)		SEG: 0.47 (146/313)	1.07	0.03	1.04	0.06	1.07	1.04	1.07	1.07	1.07	132.59	9.8	14.1	5.02	9.8	3.77
WBGene00000695	F56D5.1	col-121	0.04	0.05	0.06	0.02	0.03	0.02	0.04	0.02	0.03	0.02	0.05	0.02	0.04	0.02	0.06	0.4	0.6	0.4	1.67	1.67	protein	359 aa	359				Col_cuticle_N [PF01484.16]; Collagen [PF01391.17]	response to stress [GO:0006950]; structural constituent of cuticle [GO:0042302]	Collagens (type IV and type XIII), and related proteins [KOG3544]	TM(1x)		SEG: 0.19 (70/359)	0.02	0.03	0.02	0.05	0.05	0.05	0.05	0.05	0.03	0.82	1.15	1.05	0.69	0.22	1.15
WBGene00000696	T05A1.2	col-122	15.58	17.61	3.02	15.58	7.16	6.91	3.09	17.61	8.09	7.8	3.5	3.02	1.39	1.34	0.6	2.18	0.46	0.44	0.2	2.18	protein	300 aa	300				Col_cuticle_N [PF01484.16]; Collagen [PF01391.17]	body morphogenesis [GO:0010171]; locomotion [GO:0040011]; structural constituent of cuticle [GO:0042302]	Collagens (type IV and type XIII), and related proteins [KOG3544]	TM(1x)		SEG: 0.50 (151/300)	62176	28554.2	27558.8	12344	62176	28554.2	62176	62176	62176	20603.9	3990.17	3531.38	2628.84	3990.17	2915.45
WBGene00000697	W08D2.6	col-123	1.31	3.15	0.74	1.31	0.03	0.02	0.05	3.15	0.08	0.05	0.13	0.74	0.02	0.01	0.03	24.6	0.02	0.02	0.04	24.6	protein	358 aa	358				Col_cuticle_N [PF01484.16]; Collagen [PF01391.17]	structural constituent of cuticle [GO:0042302]	Collagens (type IV and type XIII), and related proteins [KOG3544]	SigP		SEG: 0.43 (155/358)	1.23	0.03	0.02	0.05	1.23	0.05	1.23	1.23	1.23	1.67	0.94	0.39	0.72	0.94	0.46
WBGene00000698	C24F3.6	col-124	53.22	68.77	3.79	30.13	35.05	36.17	53.22	38.93	45.29	46.73	68.77	2.15	2.5	2.58	3.79	0.57	0.66	0.68	1.47	1.47	protein	291 aa	291	Housekeeping			Col_cuticle_N [PF01484.16]; Collagen [PF01391.17]	structural constituent of cuticle [GO:0042302]	Collagens (type IV and type XIII), and related proteins [KOG3544]	TM(1x)		SEG: 0.36 (106/291)	138060	160598	165732	243866	243866	243866	243866	243866	165732	64321.5	4582.31	3546.25	2571.6	4582.31	2464.61
WBGene00000699	C29F4.1	col-125	1.22	1.71	0.13	1.22	0.15	0.02	0.01	1.71	0.22	0.03	0.02	0.13	0.02	0	0	7.92	0.13	0.02	0.01	7.92	protein	299 aa	299	Housekeeping			Col_cuticle_N [PF01484.16]; Collagen [PF01391.17]	body morphogenesis [GO:0010171]; lipid storage [GO:0019915]; locomotion [GO:0040011]; nematode larval development [GO:0002119]; receptor-mediated endocytosis [GO:0006898]; structural constituent of cuticle [GO:0042302]	Collagens (type IV and type XIII), and related proteins [KOG3544]	TM(1x)		SEG: 0.69 (205/299)	73.77	9.31	1.41	0.75	73.77	9.31	73.77	73.77	73.77	567.26	60.53	43.19	32.47	60.53	40.38
WBGene00000700	F54D1.2	col-126	0.11	0.13	0.01	0.11	0.01	0.01	0.01	0.13	0.01	0.01	0.01	0.01	0	0	0	10.17	0.1	0.08	0.08	10.17	protein	294 aa	294				Col_cuticle_N [PF01484.16]; Collagen [PF01391.17]	structural constituent of cuticle [GO:0042302]	Collagens (type IV and type XIII), and related proteins [KOG3544]	SigP		SEG: 0.43 (125/294)	1.22	0.12	0.1	0.1	1.22	0.12	1.22	1.22	1.22	81.87	11.33	9.35	1.77	11.33	2.87
WBGene00000701	F54D1.3	col-127	0.09	0.1	0.01	0.09	0.01	0.01	0.01	0.1	0.02	0.01	0.01	0.01	0	0	0	6.92	0.14	0.12	0.12	6.92	protein	294 aa	294				Col_cuticle_N [PF01484.16]; Collagen [PF01391.17]	structural constituent of cuticle [GO:0042302]	Collagens (type IV and type XIII), and related proteins [KOG3544]	SigP		SEG: 0.43 (125/294)	0.83	0.12	0.1	0.1	0.83	0.12	0.83	0.83	0.83	85.25	9.43	7.97	2.57	9.43	2.28
WBGene00000702	F12F6.9	col-128	0.04	0.11	0.03	0.01	0.02	0.02	0.04	0.03	0.05	0.05	0.11	0.01	0.02	0.02	0.03	0.25	0.5	0.5	2	2	protein	427 aa	427				Collagen [PF01391.17]		Collagens (type IV and type XIII), and related proteins [KOG3544]; Extracellular matrix structural constituent protein [meNOG02181]	TM(1x)		SEG: 0.28 (120/427)	0.01	0.02	0.02	0.04	0.04	0.04	0.04	0.04	0.02	1.24	0.95	0.37	0.76	0.92	0.95
WBGene00000703	M18.1	col-129	1.5	0.95	0.23	1.5	0.55	0.89	0.06	0.95	0.35	0.57	0.04	0.23	0.08	0.14	0.01	1.68	0.37	0.6	0.04	1.68	protein	279-337 aa	337				Col_cuticle_N [PF01484.16]; Collagen [PF01391.17]	structural constituent of cuticle [GO:0042302]	Collagens (type IV and type XIII), and related proteins [KOG3544]	SigP		SEG: 0.75 (209/279)	1172.06	432.17	699.21	49.99	1172.06	699.21	1172.06	1172.06	1172.06	5092.83	782.81	1227.92	248.39	782.81	282.77
WBGene00000704	F08G5.4	col-130	1.02	1.37	0.03	1.02	0.79	0.01	0.24	1.37	1.06	0.01	0.33	0.03	0.02	0	0.01	1.29	0.78	0.01	0.24	1.29	protein	299 aa	299				Col_cuticle_N [PF01484.16]; Collagen [PF01391.17]	structural constituent of cuticle [GO:0042302]	Collagens (type IV and type XIII), and related proteins [KOG3544]	TM(1x)		SEG: 0.49 (148/299)	10.08	7.83	0.1	2.4	10.08	7.83	10.08	10.08	10.08	369.32	9.92	7.38	9.92	8.94	3.48
WBGene00000705	C39E9.3	col-131	0.67	1	1.82	0.67	0.13	0.07	0.2	1	0.2	0.1	0.3	1.82	0.36	0.18	0.55	3.33	0.2	0.1	0.3	3.33	protein	308 aa	308				Collagen [PF01391.17]	embryo development ending in birth or egg hatching [GO:0009792]; reproduction [GO:0000003]	Collagens (type IV and type XIII), and related proteins [KOG3544]	TM(1x)		SEG: 0.29 (90/308)	0.2	0.04	0.02	0.06	0.2	0.06	0.2	0.2	0.2	0.11	0.3	0.2	0.25	0.3	0.26
WBGene00000706	C39E9.9	col-132	0.06	0.23	1.17	0.02	0.03	0.03	0.06	0.07	0.13	0.1	0.23	0.33	0.67	0.5	1.17	0.29	0.57	0.43	1.75	1.75	protein	276 aa	276				Col_cuticle_N [PF01484.16]; Collagen [PF01391.17]	structural constituent of cuticle [GO:0042302]	Collagens (type IV and type XIII), and related proteins [KOG3544]	TM(1x)		SEG: 0.46 (126/276)	0.02	0.04	0.03	0.07	0.07	0.07	0.07	0.07	0.04	0.06	1.18	0.3	1.18	0.57	0.29
WBGene00000707	F52B11.4	col-133	0.72	0.53	1.97	0.62	0.72	0.01	0.1	0.45	0.53	0.01	0.07	1.7	1.97	0.03	0.27	0.86	1.16	0.02	0.14	1.16	protein	304 aa	304				Col_cuticle_N [PF01484.16]; Collagen [PF01391.17]	embryo development ending in birth or egg hatching [GO:0009792]; structural constituent of cuticle [GO:0042302]	Collagens (type IV and type XIII), and related proteins [KOG3544]	TM(1x)		SEG: 0.61 (186/304)	40.23	46.64	0.82	6.31	46.64	46.64	40.23	46.64	46.64	23.71	64.69	88.54	19.16	64.69	14.07
WBGene00000708	M199.5	col-135	11.45	0.1	0.87	11.45	1.59	5.32	0.23	0.1	0.01	0.05	0	0.87	0.12	0.4	0.02	2.15	0.14	0.46	0.02	2.15	protein	564-660 aa	660				Collagen [PF01391.17]			SigP		SEG: 0.73 (484/660)	2.52	0.35	1.17	0.05	2.52	1.17	2.52	2.52	2.52	2.9	0.22	24.97	0.22	0.15	0.16
WBGene00000710	Y51H4A.9	col-137	1.94	1.16	0.1	1.94	0.16	0.09	0.03	1.16	0.1	0.05	0.02	0.1	0.01	0	0	11.86	0.08	0.05	0.02	11.86	protein	351 aa	351				Col_cuticle_N [PF01484.16]; Collagen [PF01391.17]	structural constituent of cuticle [GO:0042302]	Collagens (type IV and type XIII), and related proteins [KOG3544]	TM(1x)		SEG: 0.61 (214/351)	11.5	0.97	0.53	0.19	11.5	0.97	11.5	11.5	11.5	116.19	5.94	9.9	0.49	5.94	0.79
WBGene00000711	C52D10.13	col-138	0.1	0.28	0	0.1	0	0.04	0.01	0.28	0	0.12	0.03	0	0	0	0	2.35	0.01	0.43	0.11	2.35	protein	281 aa	281				Col_cuticle_N [PF01484.16]; Collagen [PF01391.17]	structural constituent of cuticle [GO:0042302]	Collagens (type IV and type XIII), and related proteins [KOG3544]	TM(1x)		SEG: 0.53 (149/281)	4.65	0.04	1.98	0.49	4.65	1.98	4.65	4.65	4.65	1817	48.09	16.83	48.09	39.74	18.84
WBGene00000712	F41F3.4	col-139	2.37	1.74	0.48	2.37	0.81	1.24	0.41	1.74	0.59	0.91	0.3	0.48	0.16	0.25	0.08	1.9	0.34	0.53	0.17	1.9	protein	310 aa	310				Col_cuticle_N [PF01484.16]; Collagen [PF01391.17]	body morphogenesis [GO:0010171]; locomotion [GO:0040011]; structural constituent of cuticle [GO:0042302]	Collagens (type IV and type XIII), and related proteins [KOG3544]	TM(1x)		SEG: 0.61 (190/310)	2041.71	698.56	1072.65	350.09	2041.71	1072.65	2041.71	2041.71	2041.71	4244.28	862.6	1174.37	319.54	862.6	293.34
WBGene00000713	F26F12.1	col-140	0.19	0.27	0.29	0.17	0.03	0.19	0.06	0.24	0.04	0.27	0.08	0.26	0.04	0.29	0.09	0.9	0.15	1.11	0.31	1.11	protein	210-289 aa	289				Col_cuticle_N [PF01484.16]; Collagen [PF01391.17]	structural constituent of cuticle [GO:0042302]	Collagens (type IV and type XIII), and related proteins [KOG3544]	SigP		SEG: 0.49 (142/289)	991.58	166.79	1096.22	342.59	1096.22	1096.22	1096.22	991.58	1096.22	3753.71	5812.28	4068.52	3414.46	5812.28	4289.36
WBGene00000714	T15B7.5	col-141	0.17	0.02	0.03	0.14	0.17	0.12	0.14	0.02	0.02	0.01	0.02	0.03	0.03	0.02	0.03	0.86	1.17	0.71	0.86	1.17	protein	314 aa	314				Col_cuticle_N [PF01484.16]; Collagen [PF01391.17]	structural constituent of cuticle [GO:0042302]	Collagens (type IV and type XIII), and related proteins [KOG3544]	TM(1x)		SEG: 0.61 (190/314)	0.06	0.07	0.05	0.06	0.07	0.07	0.06	0.07	0.07	2.1	0.42	3.88	0.42	0.4	0.17
WBGene00000715	T15B7.4	col-142	0.09	0.05	0.04	0.09	0	0	0	0.05	0	0	0	0.04	0	0	0	19.83	0.04	0.05	0	19.83	protein	325 aa	325				Col_cuticle_N [PF01484.16]; Collagen [PF01391.17]	structural constituent of cuticle [GO:0042302]	Collagens (type IV and type XIII), and related proteins [KOG3544]	TM(1x)		SEG: 0.69 (223/325)	22.81	0.95	1.15	0.11	22.81	1.15	22.81	22.81	22.81	626.39	240.28	463.99	113.8	240.28	126.52
WBGene00000716	T15B7.3	col-143	0.07	0.08	0.11	0.07	0	0.01	0	0.08	0	0.01	0	0.11	0.01	0.01	0	7.98	0.05	0.13	0.01	7.98	protein	319 aa	319				Col_cuticle_N [PF01484.16]; Collagen [PF01391.17]	structural constituent of cuticle [GO:0042302]	Collagens (type IV and type XIII), and related proteins [KOG3544]	TM(1x)		SEG: 0.65 (207/319)	107.27	5.52	13.45	0.89	107.27	13.45	107.27	107.27	107.27	993.8	1617.19	1337.67	1207.46	1617.19	1277.69
WBGene00000717	B0222.6	col-144	0.81	0.81	0.05	0.81	0.08	0.11	0.13	0.81	0.08	0.11	0.13	0.05	0	0.01	0.01	6.13	0.09	0.14	0.16	6.13	protein	294 aa	294	Housekeeping			Col_cuticle_N [PF01484.16]; Collagen [PF01391.17]	structural constituent of cuticle [GO:0042302]		SigP		SEG: 0.62 (183/294)	48.27	4.51	6.58	7.88	48.27	7.88	48.27	48.27	48.27	1049.9	59.73	59.35	25.53	59.73	55.59
WBGene00000718	B0222.7	col-145	1.44	1.71	0.22	0.06	1.44	0	0.51	0.07	1.71	0	0.6	0.01	0.22	0	0.08	0.04	2.83	0	0.35	2.83	protein	294 aa	294				Col_cuticle_N [PF01484.16]; Collagen [PF01391.17]	structural constituent of cuticle [GO:0042302]		SigP		SEG: 0.48 (141/294)	1.45	37.09	0.05	13.09	37.09	37.09	13.09	37.09	37.09	168.05	25.78	21.66	4.71	25.78	7.87
WBGene00000719	T06E4.6	col-146	6.15	7.11	0.1	6.15	0.91	1.24	0.14	7.11	1.05	1.44	0.16	0.1	0.01	0.02	0	4.94	0.15	0.2	0.02	4.94	protein	290 aa	290				Col_cuticle_N [PF01484.16]; Collagen [PF01391.17]	embryo development ending in birth or egg hatching [GO:0009792]; structural constituent of cuticle [GO:0042302]	Collagens (type IV and type XIII), and related proteins [KOG3544]	TM(1x)		SEG: 0.53 (155/290)	86.35	12.77	17.47	1.92	86.35	17.47	86.35	86.35	86.35	889.69	14.05	12.14	5.05	14.05	4.09
WBGene00000720	T06E4.4	col-147	0.04	0.03	0.72	0.04	0	0	0	0.03	0	0	0	0.72	0.06	0.05	0.05	12.46	0.08	0.07	0.07	12.46	protein	290 aa	290				Col_cuticle_N [PF01484.16]; Collagen [PF01391.17]	embryo development ending in birth or egg hatching [GO:0009792]; structural constituent of cuticle [GO:0042302]	Collagens (type IV and type XIII), and related proteins [KOG3544]	TM(1x)		SEG: 0.59 (172/290)	1.62	0.13	0.12	0.12	1.62	0.13	1.62	1.62	1.62	2.26	41.51	56.43	16.73	41.51	16.25
WBGene00000721	C12D8.8	col-148	0.03	0.7	1.17	0.01	0.02	0.01	0.03	0.2	0.4	0.3	0.7	0.33	0.67	0.5	1.17	0.29	0.57	0.43	1.75	1.75	protein	295 aa	295				Col_cuticle_N [PF01484.16]; Collagen [PF01391.17]	structural constituent of cuticle [GO:0042302]	Collagens (type IV and type XIII), and related proteins [KOG3544]	TM(1x)		SEG: 0.26 (77/295)	0.02	0.04	0.03	0.07	0.07	0.07	0.07	0.07	0.04	0.06	2.24	0.1	0.37	2.24	0.34
WBGene00000722	B0024.1	col-149	0.04	0.1	0.03	0.03	0.04	0	0	0.06	0.1	0	0	0.02	0.03	0	0	0.64	1.56	0.04	0.01	1.56	protein	297 aa	297	Housekeeping			Col_cuticle_N [PF01484.16]; Collagen [PF01391.17]	structural constituent of cuticle [GO:0042302]	Collagens (type IV and type XIII), and related proteins [KOG3544]	TM(1x)		SEG: 0.32 (96/297)	2.73	4.26	0.16	0.05	4.26	4.26	2.73	4.26	4.26	123.01	104.99	44.6	31.18	104.99	40
WBGene00000723	B0024.2	col-150	0.04	0.07	0.01	0.02	0.04	0	0	0.05	0.07	0	0	0.01	0.01	0	0	0.7	1.43	0.02	0.06	1.43	protein	297 aa	297	Housekeeping			Col_cuticle_N [PF01484.16]; Collagen [PF01391.17]	structural constituent of cuticle [GO:0042302]	Collagens (type IV and type XIII), and related proteins [KOG3544]	TM(1x)		SEG: 0.28 (84/297)	0.65	0.93	0.02	0.06	0.93	0.93	0.65	0.93	0.93	82.65	26.17	13.25	12.41	26.17	11.17
WBGene00000724	AC3.6	col-151	0.25	0.23	1.2	0.08	0.17	0.08	0.25	0.08	0.15	0.08	0.23	0.4	0.8	0.4	1.2	0.33	0.67	0.33	1.5	1.5	protein	325 aa	325				Col_cuticle_N [PF01484.16]; Collagen [PF01391.17]	structural constituent of cuticle [GO:0042302]	Collagens (type IV and type XIII), and related proteins [KOG3544]	SigP		SEG: 0.32 (104/325)	0.02	0.04	0.02	0.06	0.06	0.06	0.06	0.06	0.04	0.05	0.24	0.26	0.24	0.04	0.13
WBGene00000725	F32G8.5	col-152	0.06	0.08	1	0.02	0.04	0.03	0.06	0.03	0.06	0.04	0.08	0.33	0.67	0.5	1	0.33	0.67	0.5	1.5	1.5	protein	294 aa	294				Col_cuticle_N [PF01484.16]; Collagen [PF01391.17]	structural constituent of cuticle [GO:0042302]	Collagens (type IV and type XIII), and related proteins [KOG3544]	TM(1x)		SEG: 0.26 (75/294)	0.02	0.04	0.03	0.06	0.06	0.06	0.06	0.06	0.04	0.06	0.99	0.72	0.61	0.99	0.41
WBGene00000726	F17C11.3	col-153	3.38	0.73	1.11	1.42	0.84	3.38	0.03	0.31	0.18	0.73	0.01	0.47	0.28	1.11	0.01	0.42	0.25	2.38	0.01	2.38	protein	337 aa	337				Col_cuticle_N [PF01484.16]; Collagen [PF01391.17]	structural constituent of cuticle [GO:0042302]	Collagens (type IV and type XIII), and related proteins [KOG3544]	TM(1x)		SEG: 0.21 (72/337)	2.15	1.27	5.11	0.04	5.11	5.11	5.11	2.15	5.11	4.61	1.51	7.02	1.18	1.51	1.06
WBGene00000727	F55C10.2	col-154	1.79	2.26	0.42	0.88	1.79	0.21	1.62	1.11	2.26	0.26	2.04	0.21	0.42	0.05	0.38	0.49	1.11	0.11	0.9	1.11	protein	299 aa	299				Col_cuticle_N [PF01484.16]; Collagen [PF01391.17]	body morphogenesis [GO:0010171]; embryo development ending in birth or egg hatching [GO:0009792]; locomotion [GO:0040011]; nematode larval development [GO:0002119]; structural constituent of cuticle [GO:0042302]	Collagens (type IV and type XIII), and related proteins [KOG3544]	TM(1x)		SEG: 0.64 (192/299)	26.79	54.36	6.23	49.02	54.36	54.36	49.02	54.36	54.36	128.85	30.33	24.05	9.15	30.33	9.47
WBGene00000728	F55C10.3	col-155	13.45	5.1	1.13	13.45	4.64	7.1	4.74	5.1	1.76	2.69	1.8	1.13	0.39	0.6	0.4	1.89	0.34	0.53	0.35	1.89	protein	299 aa	299				Col_cuticle_N [PF01484.16]; Collagen [PF01391.17]	body morphogenesis [GO:0010171]; embryo development ending in birth or egg hatching [GO:0009792]; locomotion [GO:0040011]; nematode larval development [GO:0002119]; structural constituent of cuticle [GO:0042302]	Collagens (type IV and type XIII), and related proteins [KOG3544]	TM(1x)		SEG: 0.62 (186/299)	371.87	128.22	196.38	131.11	371.87	196.38	371.87	371.87	371.87	328.39	27.64	72.96	10.24	27.64	13.92
WBGene00000729	F57B7.3	col-156	0.01	0.01	0	0.01	0.01	0	0.01	0.01	0.01	0	0.01	0	0	0	0	1.33	0.5	0.25	0.75	1.33	protein	295 aa	295				Col_cuticle_N [PF01484.16]; Collagen [PF01391.17]	structural constituent of cuticle [GO:0042302]	Collagens (type IV and type XIII), and related proteins [KOG3544]	SigP		SEG: 0.49 (146/295)	0.08	0.04	0.02	0.06	0.08	0.06	0.08	0.08	0.08	236.02	6.19	5.93	1.55	6.19	2.61
WBGene00000730	T11F9.9	col-157	0.97	1.25	0.36	0.97	0.2	0.85	0.13	1.25	0.26	1.1	0.17	0.36	0.07	0.32	0.05	1.14	0.21	0.88	0.14	1.14	protein	299 aa	299				Col_cuticle_N [PF01484.16]; Collagen [PF01391.17]	body morphogenesis [GO:0010171]; embryo development ending in birth or egg hatching [GO:0009792]; locomotion [GO:0040011]; nematode larval development [GO:0002119]; structural constituent of cuticle [GO:0042302]	Collagens (type IV and type XIII), and related proteins [KOG3544]	TM(1x)		SEG: 0.64 (192/299)	15.01	3.1	13.21	2.03	15.01	13.21	15.01	15.01	15.01	41.38	15.47	11.99	6.66	15.47	5.71
WBGene00000731	D2023.7	col-158	0	0.01	0.01	0	0	0	0	0	0.01	0	0.01	0	0.01	0	0.01	0.25	0.75	0.5	1.33	1.33	protein	336 aa	336				Col_cuticle_N [PF01484.16]; Collagen [PF01391.17]	embryo development ending in birth or egg hatching [GO:0009792]; structural constituent of cuticle [GO:0042302]	Collagens (type IV and type XIII), and related proteins [KOG3544]	SigP		SEG: 0.47 (158/336)	0.01	0.03	0.02	0.04	0.04	0.04	0.04	0.04	0.03	4.14	9.31	4.42	5.4	4.25	9.31
WBGene00000732	F57B1.3	col-159	0.74	0.41	0.03	0.43	0.14	0.35	0.74	0.24	0.08	0.19	0.41	0.02	0.01	0.01	0.03	0.58	0.19	0.47	1.73	1.73	protein	313 aa	313	Housekeeping			Col_cuticle_N [PF01484.16]; Collagen [PF01391.17]	structural constituent of cuticle [GO:0042302]	Collagens (type IV and type XIII), and related proteins [KOG3544]	TM(1x)		SEG: 0.53 (167/313)	94.55	31.49	77.7	163.64	163.64	163.64	163.64	163.64	94.55	5781.87	221.41	399.65	75.11	221.41	76.42
WBGene00000733	F57B1.4	col-160	19.56	16.37	2.26	19.56	11.11	11.23	4.73	16.37	9.3	9.4	3.96	2.26	1.29	1.3	0.55	1.74	0.57	0.57	0.24	1.74	protein	317 aa	317	Housekeeping			Col_cuticle_N [PF01484.16]; Collagen [PF01391.17]	structural constituent of cuticle [GO:0042302]	Collagens (type IV and type XIII), and related proteins [KOG3544]	TM(1x)		SEG: 0.54 (172/317)	28366.8	16117.8	16288.1	6861.71	28366.8	16288.1	28366.8	28366.8	28366.8	12529.4	1450.39	1733.16	705.15	1450.39	857.92
WBGene00000734	C50B6.4	col-161	1.08	1.03	0.02	1.08	0	0	0.18	1.03	0	0	0.17	0.02	0	0	0	6.15	0	0	0.16	6.15	protein	291 aa	291				Col_cuticle_N [PF01484.16]; Collagen [PF01391.17]	structural constituent of cuticle [GO:0042302]	Collagens (type IV and type XIII), and related proteins [KOG3544]	TM(1x)		SEG: 0.59 (172/291)	32.14	0.04	0.11	5.23	32.14	5.23	32.14	32.14	32.14	1450.4	29.75	31.12	6.35	29.75	8.89
WBGene00000735	Y2H9A.3	col-162	0.56	0.42	0.01	0.56	0.11	0.01	0.01	0.42	0.08	0.01	0	0.01	0	0	0	5.28	0.19	0.02	0.01	5.28	protein	291 aa	291				Col_cuticle_N [PF01484.16]; Collagen [PF01391.17]	structural constituent of cuticle [GO:0042302]	Collagens (type IV and type XIII), and related proteins [KOG3544]	TM(1x)		SEG: 0.59 (171/291)	9.35	1.77	0.16	0.11	9.35	1.77	9.35	9.35	9.35	633.87	16.8	22.04	8.13	16.8	5.8
WBGene00000736	F46B3.17	col-163	0.22	0.2	1	0.11	0.11	0.11	0.22	0.1	0.1	0.1	0.2	0.5	0.5	0.5	1	0.5	0.5	0.5	2	2	protein	740 aa	740				Collagen [PF01391.17]			TM(1x)		SEG: 0.22 (161/740)	0.01	0.01	0.01	0.02	0.02	0.02	0.02	0.02	0.01	0.02	0.09	0.1	0.05	0.09	0.03
WBGene00000737	T21D9.1	col-164	0.13	0.36	1	0.03	0.07	0.07	0.13	0.09	0.18	0.18	0.36	0.25	0.5	0.5	1	0.25	0.5	0.5	2	2	protein	396 aa	396				Col_cuticle_N [PF01484.16]; Collagen [PF01391.17]	structural constituent of cuticle [GO:0042302]	Collagens (type IV and type XIII), and related proteins [KOG3544]	TM(1x)		SEG: 0.34 (134/396)	0.01	0.02	0.02	0.04	0.04	0.04	0.04	0.04	0.02	0.04	0.3	0.11	0.12	0.3	0.19
WBGene00000738	F14H12.1	col-165	0.08	0.12	0.06	0	0.01	0	0.08	0.01	0.01	0.01	0.12	0	0	0	0.06	0.04	0.06	0.04	16	16	protein	335 aa	335				Col_cuticle_N [PF01484.16]; Collagen [PF01391.17]	structural constituent of cuticle [GO:0042302]	Collagens (type IV and type XIII), and related proteins [KOG3544]	TM(1x)		SEG: 0.21 (70/335)	0.02	0.03	0.02	0.48	0.48	0.48	0.48	0.48	0.03	7.44	5.9	3.85	2.37	3.23	5.9
WBGene00000739	T07H6.3	col-166	0.44	0.5	0.26	0.44	0.03	0.06	0.07	0.5	0.03	0.07	0.07	0.26	0.02	0.04	0.04	6.66	0.06	0.15	0.15	6.66	protein	301-363 aa	363	Housekeeping			Col_cuticle_N [PF01484.16]; Collagen [PF01391.17]	body morphogenesis [GO:0010171]; locomotion [GO:0040011]; structural constituent of cuticle [GO:0042302]	Collagens (type IV and type XIII), and related proteins [KOG3544]	SigP+TM(1x); TM(1x)		SEG: 0.50 (151/301)	26.43	1.56	3.87	3.97	26.43	3.97	26.43	26.43	26.43	102.13	59.72	53.33	31.69	59.72	37.34
WBGene00000740	T10E10.2	col-167	0.19	0.19	0.07	0.19	0	0.02	0	0.19	0	0.02	0	0.07	0	0.01	0	9.2	0.02	0.11	0.02	9.2	protein	301 aa	301				Col_cuticle_N [PF01484.16]; Collagen [PF01391.17]	body morphogenesis [GO:0010171]; locomotion [GO:0040011]; structural constituent of cuticle [GO:0042302]	Collagens (type IV and type XIII), and related proteins [KOG3544]	TM(1x)		SEG: 0.50 (151/301)	9.38	0.17	1.02	0.2	9.38	1.02	9.38	9.38	9.38	134.34	50.05	49.36	23.54	50.05	49.61
WBGene00000741	T10E10.1	col-168	2.19	7.14	0.23	0.52	0.01	2.19	0.23	1.7	0.03	7.14	0.75	0.05	0	0.23	0.02	0.24	0	4.2	0.11	4.2	protein	301 aa	301	Housekeeping			Col_cuticle_N [PF01484.16]; Collagen [PF01391.17]	body morphogenesis [GO:0010171]; locomotion [GO:0040011]; structural constituent of cuticle [GO:0042302]	Collagens (type IV and type XIII), and related proteins [KOG3544]	TM(1x)		SEG: 0.50 (151/301)	25.28	0.5	106.14	11.21	106.14	106.14	106.14	25.28	106.14	465.32	48.46	14.87	17.62	48.46	29.01
WBGene00000742	T10E10.5	col-169	0.49	1.58	0.13	0.49	0.15	0	0.01	1.58	0.5	0.01	0.04	0.13	0.04	0	0	3.18	0.31	0.01	0.02	3.18	protein	300 aa	300	Housekeeping			Col_cuticle_N [PF01484.16]; Collagen [PF01391.17]	body morphogenesis [GO:0010171]; locomotion [GO:0040011]; structural constituent of cuticle [GO:0042302]	Collagens (type IV and type XIII), and related proteins [KOG3544]	TM(1x)		SEG: 0.48 (144/300)	13.14	4.13	0.12	0.3	13.14	4.13	13.14	13.14	13.14	98.29	26.85	8.31	12.5	26.85	19.28
WBGene00000743	T10E10.6	col-170	0.73	1.19	0.12	0.71	0.01	0.73	0.01	1.15	0.02	1.19	0.01	0.12	0	0.12	0	0.97	0.02	1.03	0.01	1.03	protein	300 aa	300	Housekeeping			Col_cuticle_N [PF01484.16]; Collagen [PF01391.17]	body morphogenesis [GO:0010171]; locomotion [GO:0040011]; structural constituent of cuticle [GO:0042302]	Collagens (type IV and type XIII), and related proteins [KOG3544]	TM(1x)		SEG: 0.48 (145/300)	13.13	0.22	13.55	0.16	13.55	13.55	13.55	13.13	13.55	111.72	18.47	11.38	7.48	18.47	8.99
WBGene00000744	T10E10.7	col-171	0.26	0.43	1	0.17	0.17	0.13	0.26	0.29	0.29	0.21	0.43	0.67	0.67	0.5	1	0.67	0.67	0.5	1.5	1.5	protein	307 aa	307				Col_cuticle_N [PF01484.16]; Collagen [PF01391.17]	structural constituent of cuticle [GO:0042302]	Collagens (type IV and type XIII), and related proteins [KOG3544]	TM(1x)		SEG: 0.35 (107/307)	0.04	0.04	0.03	0.06	0.06	0.06	0.06	0.06	0.04	0.06	0.23	0.14	0.14	0.16	0.23
WBGene00000745	F38B6.5	col-172	1.18	1.69	0.22	1.18	0.21	0.14	0.36	1.69	0.31	0.21	0.51	0.22	0.04	0.03	0.07	3.3	0.18	0.12	0.3	3.3	protein	108-341 aa	341				Col_cuticle_N [PF01484.16]; Collagen [PF01391.17]	structural constituent of cuticle [GO:0042302]	Collagens (type IV and type XIII), and related proteins [KOG3544]	TM(1x)		SEG: 0.46 (50/108)	0.66	0.12	0.08	0.2	0.66	0.2	0.66	0.66	0.66	3.05	0.56	0.39	0.24	0.56	0.49
WBGene00000746	F41C6.5	col-173	0.03	0.07	0.01	0.01	0.02	0.01	0.03	0.03	0.04	0.03	0.07	0	0.01	0	0.01	0.4	0.6	0.4	1.67	1.67	protein	325 aa	325				Col_cuticle_N [PF01484.16]; Collagen [PF01391.17]	structural constituent of cuticle [GO:0042302]	Collagens (type IV and type XIII), and related proteins [KOG3544]	TM(1x)		SEG: 0.50 (164/325)	0.02	0.03	0.02	0.05	0.05	0.05	0.05	0.05	0.03	5.89	1.47	0.69	1.47	0.7	0.51
WBGene00000747	F46C8.2	col-174	0.03	0.07	0.06	0.02	0.02	0.02	0.03	0.05	0.03	0.03	0.07	0.04	0.03	0.03	0.06	0.75	0.5	0.5	1.33	1.33	protein	314 aa	314				Col_cuticle_N [PF01484.16]; Collagen [PF01391.17]	structural constituent of cuticle [GO:0042302]	Collagens (type IV and type XIII), and related proteins [KOG3544]	TM(1x)		SEG: 0.52 (164/314)	0.03	0.02	0.02	0.04	0.04	0.04	0.04	0.04	0.03	0.67	1.3	0.58	1.3	0.86	0.34
WBGene00000748	C35B8.1	col-175	21.92	45.84	0.12	20.84	10.69	21.92	1.79	43.58	22.35	45.84	3.75	0.11	0.06	0.12	0.01	0.95	0.49	1.05	0.08	1.05	protein	287 aa	287				Col_cuticle_N [PF01484.16]; Collagen [PF01391.17]	structural constituent of cuticle [GO:0042302]	Collagens (type IV and type XIII), and related proteins [KOG3544]	SigP		SEG: 0.29 (84/287)	450.63	231.1	473.98	38.73	473.98	473.98	473.98	450.63	473.98	4049.47	21.62	10.34	21.62	12.61	4.57
WBGene00000749	ZC373.7	col-176	5.14	10.45	0.09	5.14	0.12	0.02	0.01	10.45	0.24	0.05	0.03	0.09	0	0	0	43.79	0.02	0	0	43.79	protein	297 aa	297	Housekeeping			Col_cuticle_N [PF01484.16]; Collagen [PF01391.17]	body morphogenesis [GO:0010171]; structural constituent of cuticle [GO:0042302]	Collagens (type IV and type XIII), and related proteins [KOG3544]	SigP		SEG: 0.50 (149/297)	20.58	0.47	0.09	0.05	20.58	0.47	20.58	20.58	20.58	225.85	4	1.97	2.17	3.73	4
WBGene00000750	F59F3.2	col-177	0.04	0.06	0.09	0.01	0.02	0.02	0.04	0.01	0.03	0.03	0.06	0.02	0.05	0.05	0.09	0.25	0.5	0.5	2	2	protein	430 aa	430				Collagen [PF01391.17]	locomotion [GO:0040011]	Collagens (type IV and type XIII), and related proteins [KOG3544]	TM(1x)		SEG: 0.33 (144/430)	0.01	0.02	0.02	0.04	0.04	0.04	0.04	0.04	0.02	0.44	1.11	0.67	0.93	1.11	0.92
WBGene00000751	C34F6.2	col-178	0.64	0.74	0.38	0.64	0.17	0.19	0.06	0.74	0.2	0.22	0.07	0.38	0.1	0.11	0.04	3.38	0.27	0.3	0.09	3.38	protein	283 aa	283				Col_cuticle_N [PF01484.16]; Collagen [PF01391.17]	defense response [GO:0006952]; lipid storage [GO:0019915]; structural constituent of cuticle [GO:0042302]	Collagens (type IV and type XIII), and related proteins [KOG3544]	TM(1x)		SEG: 0.48 (136/283)	2068.39	556.87	611.33	196.29	2068.39	611.33	2068.39	2068.39	2068.39	5441.48	3221.52	2776.43	2484.51	3221.52	2434.13
WBGene00000752	C34F6.3	col-179	0.08	0.27	4.3	0.08	0.01	0.01	0	0.27	0.03	0.04	0	4.3	0.41	0.69	0.07	6.23	0.09	0.16	0.02	6.23	protein	283 aa	283				Col_cuticle_N [PF01484.16]; Collagen [PF01391.17]	defense response [GO:0006952]; defense response to Gram-negative bacterium [GO:0050829]; innate immune response [GO:0045087]; lipid storage [GO:0019915]; structural constituent of cuticle [GO:0042302]	Collagens (type IV and type XIII), and related proteins [KOG3544]	TM(1x)		SEG: 0.48 (136/283)	138.23	13.03	22.18	2.14	138.23	22.18	138.23	138.23	138.23	32.16	1753.24	518.92	1171.35	1753.24	1082.62
WBGene00000753	C44C10.1	col-180	0.17	0.16	0.02	0.14	0.01	0.17	0	0.13	0.01	0.16	0	0.02	0	0.02	0	0.82	0.08	1.22	0.02	1.22	protein	300 aa	300	Housekeeping			Col_cuticle_N [PF01484.16]; Collagen [PF01391.17]	structural constituent of cuticle [GO:0042302]	Collagens (type IV and type XIII), and related proteins [KOG3544]	TM(1x)		SEG: 0.56 (168/300)	3.25	0.32	3.98	0.06	3.98	3.98	3.98	3.25	3.98	216.21	23.28	24.44	7.87	23.28	11.77
WBGene00000754	W03G11.1	col-181	12.96	15.02	1.7	12.96	9.22	11.95	8.34	15.02	10.68	13.84	9.66	1.7	1.21	1.56	1.09	1.09	0.71	0.92	0.64	1.09	protein	279-332 aa	332	Housekeeping			Col_cuticle_N [PF01484.16]; Collagen [PF01391.17]	structural constituent of cuticle [GO:0042302]	Collagens (type IV and type XIII), and related proteins [KOG3544]	TM(1x)		SEG: 0.39 (109/279)	44793.7	31870.9	41277.6	28803.2	44793.7	41277.6	44793.7	44793.7	44793.7	26420.3	3455.16	2982.98	2404.46	3455.16	2617.09
WBGene00000755	R09A8.4	col-182	0.07	0.14	0.12	0.03	0.05	0.03	0.07	0.06	0.1	0.06	0.14	0.05	0.09	0.05	0.12	0.43	0.71	0.43	1.4	1.4	protein	273 aa	273				Col_cuticle_N [PF01484.16]; Collagen [PF01391.17]	structural constituent of cuticle [GO:0042302]	Collagens (type IV and type XIII), and related proteins [KOG3544]	TM(1x)		SEG: 0.36 (97/273)	0.03	0.05	0.03	0.07	0.07	0.07	0.07	0.07	0.05	0.58	0.96	0.5	0.96	0.82	0.74
WBGene00000756	F02D10.1	col-183	0.12	1.4	2	0.12	0.05	0.06	0.08	1.4	0.56	0.72	0.93	2	0.8	1.03	1.33	1.5	0.4	0.52	0.67	1.5	protein	316 aa	316				Col_cuticle_N [PF01484.16]	body morphogenesis [GO:0010171]; positive regulation of multicellular organism growth [GO:0040018]; structural constituent of cuticle [GO:0042302]	Collagens (type IV and type XIII), and related proteins [KOG3544]	TM(1x)		SEG: 0.68 (216/316)	0.6	0.24	0.31	0.4	0.6	0.4	0.6	0.6	0.6	0.3	4.87	0.43	3.46	4.87	3.1
WBGene00000757	F15A2.1	col-184	0.1	0.11	0.1	0.1	0	0.01	0	0.11	0	0.01	0	0.1	0	0.01	0	12.52	0.03	0.08	0.04	12.52	protein	286-291 aa	291				Col_cuticle_N [PF01484.16]; Collagen [PF01391.17]	embryo development ending in birth or egg hatching [GO:0009792]; structural constituent of cuticle [GO:0042302]	Collagens (type IV and type XIII), and related proteins [KOG3544]	SigP; TM(1x)		SEG: 0.47 (135/286)	165.88	5.41	13.25	6.94	165.88	13.25	165.88	165.88	165.88	1708.61	1703.25	1458.56	1292.3	1703.25	1232.46
WBGene00000758	H06A10.2	col-185	4.15	0.95	0.52	4.15	0.38	1.77	1	0.95	0.09	0.4	0.23	0.52	0.05	0.22	0.12	2.35	0.09	0.43	0.24	2.35	protein	305 aa	305				Col_cuticle_N [PF01484.16]; Collagen [PF01391.17]	structural constituent of cuticle [GO:0042302]	Collagens (type IV and type XIII), and related proteins [KOG3544]	TM(1x)		SEG: 0.65 (197/305)	0.54	0.05	0.23	0.13	0.54	0.23	0.54	0.54	0.54	1.04	0.13	0.57	0.13	0.1	0.13
WBGene00000759	E03G2.4	col-186	0.01	0.05	0.06	0.01	0.01	0.01	0.01	0.03	0.03	0.02	0.05	0.04	0.04	0.03	0.06	0.6	0.6	0.4	1.67	1.67	protein	333 aa	333				Col_cuticle_N [PF01484.16]; Collagen [PF01391.17]	structural constituent of cuticle [GO:0042302]	Collagens (type IV and type XIII), and related proteins [KOG3544]	SigP		SEG: 0.37 (124/333)	0.03	0.03	0.02	0.05	0.05	0.05	0.05	0.05	0.03	0.77	3.71	1.01	2.15	3.71	1.82
WBGene00000760	C30F2.1	col-187	0.67	0.12	1	0.22	0.44	0.33	0.67	0.04	0.08	0.06	0.12	0.33	0.67	0.5	1	0.33	0.67	0.5	1.5	1.5	protein	307 aa	307				Collagen [PF01391.17]		Collagens (type IV and type XIII), and related proteins [KOG3544]	TM(1x)		SEG: 0.32 (99/307)	0.02	0.04	0.03	0.06	0.06	0.06	0.06	0.06	0.04	0.06	0.09	0.5	0.09	0.04	0.09
WBGene00000761	C24A11.9	coq-1	0	0	0.02	0	0	0	0	0	0	0	0	0.01	0.01	0.01	0.02	0.33	0.67	0.33	1.5	1.5	protein	393 aa	393				polyprenyl_synt [PF00348.16]	determination of adult lifespan [GO:0008340]; isoprenoid biosynthetic process [GO:0008299]; locomotion [GO:0040011]; necrotic cell death [GO:0070265]; oviposition [GO:0018991]; ubiquinone biosynthetic process [GO:0006744]	Geranylgeranyl pyrophosphate synthase [COG0142]; Geranylgeranyl pyrophosphate synthase/Polyprenyl synthetase [KOG0776]; Prenyl (decaprenyl) diphosphate synthase, subunit 1 [meNOG03743]			SEG: 0.05 (20/393)	0.01	0.02	0.01	0.03	0.03	0.03	0.03	0.03	0.02	1.65	19.85	27.62	19.85	19.8	17.64
WBGene00000762	F57B9.4	coq-2	0.03	0.02	0.03	0.02	0.02	0.03	0.02	0.01	0.02	0.02	0.01	0.02	0.03	0.03	0.02	0.64	0.96	1.04	0.66	1.04	protein	201-427 aa	427				UbiA [PF01040.17]	biosynthetic process [GO:0009058]; determination of adult lifespan [GO:0008340]; integral component of membrane [GO:0016021]; prenyltransferase activity [GO:0004659]; ubiquinone biosynthetic process [GO:0006744]	4-hydroxybenzoate polyprenyltransferase and related prenyltransferases [COG0382]; Coenzyme Q2 homolog, prenyltransferase (yeast) [meNOG01733]; Para-hydroxybenzoate-polyprenyl transferase [KOG1381]	TM(10x); TM(4x); TM(6x); TM(8x)		SEG: 0.10 (20/201)	0.3	0.45	0.47	0.31	0.47	0.47	0.47	0.45	0.47	14.15	18.73	28.56	18.18	18.14	18.73
WBGene00000763	Y57G11C.11	coq-3	0.04	0.02	0.79	0.01	0.02	0.01	0.04	0.01	0.01	0.01	0.02	0.2	0.47	0.23	0.79	0.25	0.59	0.3	1.68	1.68	protein; ncRNA	268 aa	268				MTS [PF05175.13]; Methyltransf_11 [PF08241.11]; Methyltransf_12 [PF08242.11]; Methyltransf_23 [PF13489.5]; Methyltransf_25 [PF13649.5]; Methyltransf_31 [PF13847.5]; Methyltransf_32 [PF13679.5]	2-polyprenyl-6-methoxy-1,4-benzoquinone methyltransferase activity [GO:0008425]; determination of adult lifespan [GO:0008340]; methyltransferase activity [GO:0008168]; mitochondrial inner membrane [GO:0005743]; nematode larval development [GO:0002119]; ubiquinone biosynthetic process [GO:0006744]	2-polyprenyl-3-methyl-5-hydroxy-6-metoxy-1,4-benzoquinol methylase [COG2227]; Coenzyme Q3 homolog, methyltransferase (S. cerevisiae) [meNOG12384]; Methyltransferases [KOG1270]			SEG: 0.03 (8/268)	0.16	0.38	0.19	0.64	0.64	0.64	0.64	0.64	0.38	0.81	17.71	27.57	15.75	16.17	17.71
WBGene00000764	T03F1.2	coq-4	0.01	0	0.01	0	0	0	0.01	0	0	0	0	0.01	0.01	0.01	0.01	0.38	0.62	0.38	1.6	1.6	protein	231 aa	231				Coq4 [PF05019.12]	determination of adult lifespan [GO:0008340]; ubiquinone biosynthetic process [GO:0006744]	Component of the coenzyme Q biosynthetic pathway. May play a role in organizing a multi-subunit COQ enzyme complex required for coenzyme Q biosynthesis. Required for steady-state levels of other COQ polypeptides [meNOG08092]; Protein involved in ubiquinone biosynthesis [KOG3244]; Uncharacterized protein involved in ubiquinone biosynthesis [COG5031]				0.03	0.05	0.03	0.08	0.08	0.08	0.08	0.08	0.05	5.44	13.51	25.23	13.51	13.34	10.37
WBGene00000765	ZK652.9	coq-5	0.01	0	0.03	0	0.01	0	0	0	0	0	0	0	0.03	0	0.01	0.1	3.5	0.1	0.29	3.5	protein	285 aa	285				MTS [PF05175.13]; Methyltransf_11 [PF08241.11]; Methyltransf_12 [PF08242.11]; Methyltransf_23 [PF13489.5]; Methyltransf_25 [PF13649.5]; Methyltransf_31 [PF13847.5]; Ubie_methyltran [PF01209.17]	determination of adult lifespan [GO:0008340]; methyltransferase activity [GO:0008168]; ubiquinone biosynthetic process [GO:0006744]	Coenzyme Q5 homolog, methyltransferase [meNOG07126]; Methylase involved in ubiquinone/menaquinone biosynthesis [COG2226]; Ubiquinone biosynthesis methyltransferase COQ5 [KOG1540]				0.02	0.21	0.02	0.06	0.21	0.21	0.06	0.21	0.21	6.84	28.98	74.42	28.77	28.98	27.51
WBGene00000766	K07B1.2	coq-6	0	0	1.33	0	0	0	0	0	0	0	0	0.33	0.67	0.67	1.33	0.25	0.5	0.5	2	2	protein	451 aa	451				FAD_binding_3 [PF01494.18]; SE [PF08491.9]	determination of adult lifespan [GO:0008340]; flavin adenine dinucleotide binding [GO:0050660]; metabolic process [GO:0008152]; monooxygenase activity [GO:0004497]; oxidation-reduction process [GO:0055114]; oxidoreductase activity [GO:0016491]; oxidoreductase activity, acting on paired donors, with incorporation or reduction of molecular oxygen, NAD(P)H as one donor, and incorporation of one atom…	2-polyprenyl-6-methoxyphenol hydroxylase and related FAD-dependent oxidoreductases [COG0654]; Coenzyme Q6 homolog, monooxygenase (S. cerevisiae) [meNOG11884]; Monooxygenase involved in coenzyme Q (ubiquinone) biosynthesis [KOG3855]				0.01	0.02	0.02	0.04	0.04	0.04	0.04	0.04	0.02	0.03	23.7	34.43	23.7	23.56	22.99
WBGene00000767	C35D10.4	coq-8	0	0	0	0	0	0	0	0	0	0	0	0	0	0	0	0.5	0.5	0.5	2	2	protein	755 aa	755				ABC1 [PF03109.15]	determination of adult lifespan [GO:0008340]; reproduction [GO:0000003]; transferase activity, transferring phosphorus-containing groups [GO:0016772]; ubiquinone biosynthetic process [GO:0006744]	ABC (ATP binding cassette) 1 protein [KOG1234]; Chaperone, ABC1 activity of bc1 complex homolog (S. pombe) protein [meNOG00578]; Predicted unusual protein kinase [COG0661]			SEG: 0.02 (17/755)	0.01	0.01	0.01	0.02	0.02	0.02	0.02	0.02	0.01	10.86	25.64	48.88	22.87	22.92	25.64
WBGene00000768	R01H10.3	cor-1	0.01	0.01	0.04	0	0	0	0.01	0	0.01	0	0.01	0.02	0.02	0.02	0.04	0.36	0.55	0.36	1.83	1.83	protein	495-607 aa	607				ANAPC4_WD40 [PF12894.6]; DUF1899 [PF08953.10]; WD40 [PF00400.31]; WD40_4 [PF16300.4]	meiotic nuclear division [GO:0007126]; protein binding [GO:0005515]	Actin-binding protein Coronin, contains WD40 repeats [KOG0303]; Coronin, actin binding protein [meNOG03946]; FOG: WD40 repeat [COG2319]		NCoils: 0.06 (35/605); 0.07 (35/538); 0.06 (35/607)	SEG: 0.19 (117/607)	0.04	0.06	0.04	0.11	0.11	0.11	0.11	0.11	0.06	2.6	19.91	8.93	15.89	19.91	17.93
WBGene00000770	C40H1.1	cpb-1	0	0	0.08	0	0	0	0	0	0	0	0	0.04	0.04	0.04	0.08	0.5	0.5	0.5	2	2	protein	560 aa	560				CEBP_ZZ [PF16366.4]; RRM_1 [PF00076.21]; RRM_7 [PF16367.4]	cytoplasm [GO:0005737]; germ cell development [GO:0007281]; mRNA 3'-UTR binding [GO:0003730]; meiotic nuclear division [GO:0007126]; nucleic acid binding [GO:0003676]; nucleotide binding [GO:0000166]; oocyte development [GO:0048599]; regulation of translation [GO:0006417]; spermatogenesis [GO:0007283]	Cytoplasmic polyadenylation element binding protein [meNOG03061]; Predicted RNA-binding protein (RRM superfamily) [KOG0129]				0.01	0.01	0.01	0.02	0.02	0.02	0.02	0.02	0.01	0.26	50.47	32.55	38.74	36.66	50.47
WBGene00000771	C30B5.3	cpb-2	0	0.04	0.01	0	0	0	0	0.01	0.01	0.01	0.04	0	0	0	0.01	0.33	0.33	0.33	3	3	protein	570 aa	570				CEBP_ZZ [PF16366.4]; RRM_1 [PF00076.21]; RRM_7 [PF16367.4]	nucleic acid binding [GO:0003676]; nucleotide binding [GO:0000166]	Cytoplasmic polyadenylation element binding protein [meNOG03061]; Predicted RNA-binding protein (RRM superfamily) [KOG0129]			SEG: 0.04 (23/570)	0.01	0.01	0.01	0.03	0.03	0.03	0.03	0.03	0.01	2.87	68.89	0.82	68.89	53.01	66.61
WBGene00000772	B0414.5	cpb-3	0.01	0	0.02	0.01	0	0	0	0	0	0	0	0.02	0	0	0	4	0.12	0.12	0.25	4	protein	745 aa	745				CEBP_ZZ [PF16366.4]; RRM_1 [PF00076.21]; RRM_7 [PF16367.4]	apoptotic process [GO:0006915]; embryo development ending in birth or egg hatching [GO:0009792]; gamete generation [GO:0007276]; germ cell development [GO:0007281]; nucleic acid binding [GO:0003676]; nucleotide binding [GO:0000166]; reproduction [GO:0000003]	Cytoplasmic polyadenylation element binding protein [meNOG00130]; Predicted RNA-binding protein (RRM superfamily) [KOG0129]			SEG: 0.04 (28/745)	0.08	0.01	0.01	0.02	0.08	0.02	0.08	0.08	0.08	5.03	13.54	86.9	11.29	12.19	13.54
WBGene00000773	F28C6.3	cpf-1	0	0	1	0	0	0	0	0	0	0	0	0.33	0.67	0.33	1	0.33	0.67	0.33	1.5	1.5	protein	430 aa	430				ANAPC4_WD40 [PF12894.6]; CSTF1_dimer [PF16699.4]; Ge1_WD40 [PF16529.4]; WD40 [PF00400.31]; eIF2A [PF08662.10]	embryo development ending in birth or egg hatching [GO:0009792]; locomotion [GO:0040011]; negative regulation of vulval development [GO:0040027]; nematode larval development [GO:0002119]; oogenesis [GO:0048477]; protein binding [GO:0005515]; receptor-mediated endocytosis [GO:0006898]; reproduction [GO:0000003]	Cleavage stimulation factor, 3' pre-RNA, subunit 1 [meNOG04464]; FOG: WD40 repeat [COG2319]; mRNA cleavage stimulating factor complex\; subunit 1 [KOG0640]				0.01	0.02	0.01	0.03	0.03	0.03	0.03	0.03	0.02	0.03	20.12	65.43	20.12	16.87	19.71
WBGene00000774	F56A8.6	cpf-2	0.32	0.11	0.82	0.02	0.32	0.01	0.08	0.01	0.11	0	0.03	0.04	0.82	0.02	0.2	0.05	4.11	0.02	0.24	4.11	protein	336 aa	336				CSTF2_hinge [PF14327.5]; CSTF_C [PF14304.5]; RRM_1 [PF00076.21]	RNA interference [GO:0016246]; embryo development ending in birth or egg hatching [GO:0009792]; negative regulation of vulval development [GO:0040027]; nuclear speck [GO:0016607]; nucleic acid binding [GO:0003676]; nucleotide binding [GO:0000166]; receptor-mediated endocytosis [GO:0006898]; reproduction [GO:0000003]	Cleavage stimulation factor, 3' pre-RNA, subunit 2 [meNOG01508]; RNA-binding proteins (RRM domain) [COG0724]; mRNA cleavage and polyadenylation factor I complex, subunit RNA15 [KOG0108]		NCoils: 0.06 (21/336)	SEG: 0.23 (76/336)	0.35	7.02	0.14	1.71	7.02	7.02	1.71	7.02	7.02	8.51	21.8	61.52	21.57	20.82	21.8
WBGene00000775	F38E11.3	cpin-1	0.01	0.01	0.29	0	0	0	0.01	0	0	0	0.01	0.07	0.14	0.14	0.29	0.25	0.5	0.5	2	2	protein	424 aa	424				Amidohydro_1 [PF01979.19]	hydrolase activity [GO:0016787]; hydrolase activity, acting on carbon-nitrogen (but not peptide) bonds [GO:0016810]	Atrazine chlorohydrolase/guanine deaminase [KOG3968]; Cytosine deaminase and related metal-dependent hydrolases [COG0402]; Guanine deaminase [meNOG05295]				0.01	0.02	0.02	0.04	0.04	0.04	0.04	0.04	0.02	0.14	5.41	6.47	5.2	5.41	4.3
WBGene00000776	T03E6.7	cpl-1	0	0	0.38	0	0	0	0	0	0	0	0	0.14	0.22	0.16	0.38	0.36	0.57	0.43	1.75	1.75	protein	198-337 aa	337				Inhibitor_I29 [PF08246.11]; Peptidase_C1 [PF00112.22]; Peptidase_C1_2 [PF03051.14]	cysteine-type peptidase activity [GO:0008234]; embryo development ending in birth or egg hatching [GO:0009792]; locomotion [GO:0040011]; necrotic cell death [GO:0070265]; nematode larval development [GO:0002119]; proteolysis [GO:0006508]; vesicle lumen [GO:0031983]; yolk granule [GO:0042718]	Cathepsin protein [meNOG01417]; Cysteine protease [COG4870]; Cysteine proteinase Cathepsin L [KOG1543]	SigP		SEG: 0.03 (11/337)	0.05	0.08	0.06	0.14	0.14	0.14	0.14	0.14	0.08	0.37	1021.4	1238.09	1021.4	896.46	929.74
WBGene00000777	F43G9.9	cpn-1	3.71	1.45	1.07	0.88	3.71	0.15	3.65	0.34	1.45	0.06	1.43	0.25	1.07	0.04	1.05	0.24	1.02	0.04	0.98	1.02	protein	192 aa	192	Housekeeping			CAMSAP_CH [PF11971.7]; CH [PF00307.30]; Calponin [PF00402.17]	axonal fasciculation [GO:0007413]; mitotic nuclear division [GO:0007067]; protein binding [GO:0005515]	Calponin [COG5199]; Calponin [KOG2046]; Transgelin protein [meNOG13925]				111.23	470.85	19.29	462.89	470.85	470.85	462.89	470.85	470.85	441.48	126.88	323.76	123.26	122.67	126.88
WBGene00000778	D1069.2	cpn-2	0.05	0.03	0.03	0.02	0.03	0.02	0.05	0.01	0.02	0.01	0.03	0.01	0.02	0.01	0.03	0.38	0.62	0.38	1.62	1.62	protein	203 aa	203				CH [PF00307.30]; Calponin [PF00402.17]	protein binding [GO:0005515]	Calponin [COG5199]; Calponin [KOG2046]; Transgelin protein [meNOG13925]				0.05	0.08	0.05	0.13	0.13	0.13	0.13	0.13	0.08	4.67	2.42	4.52	2.01	2.23	2.42
WBGene00000779	F28H1.2	cpn-3	0.01	0.02	0.02	0.01	0	0	0	0.02	0	0	0	0.02	0	0	0	20.49	0.04	0.05	0.01	20.49	protein	142 aa	142	Housekeeping			CH [PF00307.30]	embryo development ending in birth or egg hatching [GO:0009792]; myofibril [GO:0030016]; nematode larval development [GO:0002119]; protein binding [GO:0005515]					17.01	0.66	0.83	0.1	17.01	0.83	17.01	17.01	17.01	805.88	1276.62	698.8	844.07	1276.62	1040.01
WBGene00000780	F49D11.8	cpn-4	0	0	0.02	0	0	0	0	0	0	0	0	0.01	0.01	0.01	0.02	0.33	0.58	0.42	1.71	1.71	protein	154 aa	154				CH [PF00307.30]	protein binding [GO:0005515]	Calponin [KOG2046]; Transgelin protein [meNOG13925]				0.04	0.07	0.05	0.12	0.12	0.12	0.12	0.12	0.07	7.16	79.45	84.95	79.45	68.72	60.95
WBGene00000781	C52E4.1	cpr-1	0	0.01	0.03	0	0	0	0	0.01	0	0	0	0.03	0	0	0	36.4	0.02	0.01	0.03	36.4	protein	329 aa	329	Housekeeping			Peptidase_C1 [PF00112.22]	cysteine-type peptidase activity [GO:0008234]; determination of adult lifespan [GO:0008340]; embryo development ending in birth or egg hatching [GO:0009792]; proteolysis [GO:0006508]	Cysteine proteinase Cathepsin L [KOG1543]	SigP		SEG: 0.04 (14/329)	1.82	0.03	0.02	0.05	1.82	0.05	1.82	1.82	1.82	58.06	693.59	341.79	664	532.1	693.59
WBGene00000782	F36D3.9	cpr-2	0.26	0.46	1.2	0.09	0.13	0.09	0.26	0.15	0.23	0.15	0.46	0.4	0.6	0.4	1.2	0.33	0.5	0.33	2	2	protein	326 aa	326				Peptidase_C1 [PF00112.22]	cysteine-type peptidase activity [GO:0008234]; proteolysis [GO:0006508]	Cysteine proteinase Cathepsin L [KOG1543]	SigP			0.02	0.03	0.02	0.06	0.06	0.06	0.06	0.06	0.03	0.05	0.23	0.13	0.23	0.07	0.16
WBGene00000783	T10H4.12	cpr-3	0	0	0.02	0	0	0	0	0	0	0	0	0.01	0.01	0.01	0.02	0.25	0.5	0.5	2	2	protein	370 aa	370				Peptidase_C1 [PF00112.22]	cysteine-type peptidase activity [GO:0008234]; embryo development ending in birth or egg hatching [GO:0009792]; innate immune response [GO:0045087]; proteolysis [GO:0006508]	Cathepsin C protein [meNOG01647]; Cysteine proteinase Cathepsin L [KOG1543]	SigP+TM(1x)		SEG: 0.04 (14/370)	0.01	0.02	0.02	0.04	0.04	0.04	0.04	0.04	0.02	1.99	63.58	10.59	63.58	40.07	49.83
WBGene00000784	F44C4.3	cpr-4	0.02	0.12	0.33	0	0.02	0	0	0.01	0.12	0	0	0.02	0.33	0	0.01	0.07	15.18	0	0.02	15.18	protein	335 aa	335	Housekeeping			Peptidase_C1 [PF00112.22]	cysteine-type peptidase activity [GO:0008234]; proteolysis [GO:0006508]	Cathepsin b protein [meNOG05041]; Cysteine proteinase Cathepsin L [KOG1543]	SigP		SEG: 0.07 (22/335)	1.43	21.71	0.1	0.53	21.71	21.71	1.43	21.71	21.71	66.45	914.04	183.41	914.04	757.15	902.65
WBGene00000785	W07B8.5	cpr-5	0	0	0.01	0	0	0	0	0	0	0	0	0	0.01	0	0	0.32	3.17	0.11	0.26	3.17	protein	344 aa	344	Housekeeping			Peptidase_C1 [PF00112.22]	cysteine-type peptidase activity [GO:0008234]; proteolysis [GO:0006508]		SigP		SEG: 0.04 (15/344)	0.06	0.19	0.02	0.05	0.19	0.19	0.06	0.19	0.19	33.04	93.12	245.72	77.91	93.12	73.63
WBGene00000786	C25B8.3	cpr-6	0	0	0.03	0	0	0	0	0	0	0	0	0.03	0.01	0	0.01	3.83	0.17	0.11	0.26	3.83	protein	369-379 aa	379				Peptidase_C1 [PF00112.22]	cysteine-type peptidase activity [GO:0008234]; lysosome [GO:0005764]; proteolysis [GO:0006508]	Cathepsin b protein [meNOG05041]; Cysteine protease [COG4870]; Cysteine proteinase Cathepsin L [KOG1543]	SigP		SEG: 0.02 (9/379)	0.46	0.08	0.05	0.12	0.46	0.12	0.46	0.46	0.46	14.35	704.9	735.41	673.51	582.76	704.9
WBGene00000787	C41D11.8	cps-6	0.01	0	0	0.01	0	0	0	0	0	0	0	0	0	0	0	3.17	0.16	0.11	0.32	3.17	protein	308 aa	308				Endonuclease_NS [PF01223.22]	DNA catabolic process, endonucleolytic [GO:0000737]; RNA catabolic process [GO:0006401]; apoptotic DNA fragmentation [GO:0006309]; apoptotic process [GO:0006915]; cell death [GO:0008219]; endodeoxyribonuclease activity [GO:0004520]; endonuclease activity [GO:0004519]; endoribonuclease activity [GO:0004521]; hydrolase activity [GO:0016787]; metal ion binding [GO:0046872]; mitochondrion [GO:0005739…	DNA/RNA endonuclease G, NUC1 [COG1864]; Endonuclease G [meNOG00527]; Mitochondrial endonuclease [KOG3721]				0.19	0.03	0.02	0.06	0.19	0.06	0.19	0.19	0.19	45.49	28.53	45.53	28.53	27.04	25.36
WBGene00000788	F32B5.8	cpz-1	0	0	0.01	0	0	0	0	0	0	0	0	0.01	0	0.01	0.01	0.83	0.6	0.9	1.11	1.11	protein	170-306 aa	306				Peptidase_C1 [PF00112.22]	body morphogenesis [GO:0010171]; cysteine-type peptidase activity [GO:0008234]; embryo development ending in birth or egg hatching [GO:0009792]; extracellular matrix [GO:0031012]; molting cycle, collagen and cuticulin-based cuticle [GO:0018996]; nematode larval development [GO:0002119]; proteolysis [GO:0006508]	Cathepsin Z protein [meNOG02540]; Cysteine proteinase Cathepsin L [KOG1543]	SigP		SEG: 0.05 (15/306)	0.25	0.18	0.27	0.3	0.3	0.3	0.3	0.3	0.27	46.88	399.18	409.63	399.18	394.78	378.04
WBGene00000789	M04G12.2	cpz-2	0	0.01	0.01	0	0	0	0	0.01	0	0	0	0.01	0	0	0	6.25	0.08	0.16	0.12	6.25	protein	467 aa	467	Housekeeping			Peptidase_C1 [PF00112.22]	cysteine-type peptidase activity [GO:0008234]; proteolysis [GO:0006508]	Cathepsin Z protein [meNOG02540]; Cysteine proteinase Cathepsin L [KOG1543]	SigP		SEG: 0.07 (33/467)	0.25	0.02	0.04	0.03	0.25	0.04	0.25	0.25	0.25	34.75	87.9	36.38	73.32	86.63	87.9
WBGene00000792	F11C7.4	crb-1	0.01	0.01	0.5	0.01	0.01	0.01	0.01	0.01	0.01	0.01	0.01	0.5	0.5	0.5	0.5	1	1	1	1	1	protein	1722 aa	1722				EGF [PF00008.26]; EGF_2 [PF07974.12]; EGF_CA [PF07645.14]; Laminin_G_1 [PF00054.22]; Laminin_G_2 [PF02210.23]; hEGF [PF12661.6]	apical part of cell [GO:0045177]; calcium ion binding [GO:0005509]; cytoplasm [GO:0005737]; locomotion [GO:0040011]; nematode larval development [GO:0002119]; protein binding [GO:0005515]	Calcium ion binding protein [meNOG01762]; Fibrillins and related proteins containing Ca2+-binding EGF-like domains [KOG1217]	SigP+TM(1x)			0	0	0	0.01	0.01	0.01	0.01	0.01	0	0.02	0.67	1.14	0.46	0.52	0.67
WBGene00000793	Y41C4A.4	crh-1	0.02	0.01	0.76	0.01	0.01	0.01	0.02	0	0.01	0	0.01	0.29	0.46	0.32	0.76	0.39	0.61	0.42	1.63	1.63	protein	189-428 aa	428		TF[Gupta+Thomas+Walhout]		bZIP_1 [PF00170.20]; bZIP_2 [PF07716.14]	DNA binding [GO:0003677]; determination of adult lifespan [GO:0008340]; intracellular signal transduction [GO:0035556]; nucleus [GO:0005634]; positive regulation of transcription from RNA polymerase II promoter [GO:0045944]; protein binding [GO:0005515]; regulation of transcription from RNA polymerase II promoter [GO:0006357]; regulation of transcription, DNA-templated [GO:0006355]; sequence-spec…	Activating transcription factor 1 [meNOG02139]; cAMP response element binding protein and related transcription factors [KOG3584]		NCoils: 0.11 (35/325); 0.11 (35/327); 0.11 (35/314); 0.11 (35/331); 0.11 (35/306); 0.19 (35/189); 0.08 (35/428)	SEG: 0.44 (84/189)	0.12	0.19	0.13	0.31	0.31	0.31	0.31	0.31	0.19	0.41	18.45	30.27	18.45	17.09	18.41
WBGene00000794	Y47G6A.8	crn-1	0	0	0	0	0	0	0	0	0	0	0	0	0	0	0	2.5	0.2	0.2	0.4	2.5	protein	382 aa	382				XPG_I [PF00867.17]; XPG_N [PF00752.16]	DNA binding [GO:0003677]; DNA repair [GO:0006281]; DNA replication [GO:0006260]; apoptotic DNA fragmentation [GO:0006309]; apoptotic process [GO:0006915]; catalytic activity [GO:0003824]; embryo development [GO:0009790]; embryo development ending in birth or egg hatching [GO:0009792]; flap endonuclease activity [GO:0048256]; hermaphrodite genitalia development [GO:0040035]; locomotion [GO:0040011…	5'-3' exonuclease (including N-terminal domain of PolI) [COG0258]; 5'-3' exonuclease [KOG2519]; Flap structure-specific endonuclease 1 [meNOG02496]		NCoils: 0.07 (28/382)	SEG: 0.13 (51/382)	0.1	0.02	0.02	0.04	0.1	0.04	0.1	0.1	0.1	33.09	24.39	117.69	22.42	23.15	24.39
WBGene00000795	CD4.2	crn-2	0.02	0.01	0.05	0.02	0	0	0.01	0.01	0	0	0	0.05	0.01	0	0.01	3.5	0.19	0.1	0.29	3.5	protein	286 aa	286				TatD_DNase [PF01026.20]	apoptotic DNA fragmentation [GO:0006309]; apoptotic cell clearance [GO:0043277]; apoptotic process [GO:0006915]; deoxyribonuclease activity [GO:0004536]; endodeoxyribonuclease activity, producing 5'-phosphomonoesters [GO:0016888]; innate immune response [GO:0045087]	Mg-dependent DNase [COG0084]; TatD-related DNase [KOG3020]; Tatd DNase domain containing 1 [meNOG08300]				0.21	0.04	0.02	0.06	0.21	0.06	0.21	0.21	0.21	4.2	9.45	18.96	8.94	8.95	9.45
WBGene00000796	C14A4.4	crn-3	0.01	0	0.01	0.01	0	0	0	0	0	0	0	0.01	0	0	0	2.75	0.18	0.18	0.36	2.75	protein	594-876 aa	876				DNA_pol_A_exo1 [PF01612.19]; HRDC [PF00570.22]; PMC2NT [PF08066.11]	3'-5' exonuclease activity [GO:0008408]; RNA processing [GO:0006396]; apoptotic DNA fragmentation [GO:0006309]; apoptotic cell clearance [GO:0043277]; apoptotic process [GO:0006915]; catalytic activity [GO:0003824]; cellular metabolic process [GO:0044237]; determination of adult lifespan [GO:0008340]; embryo development [GO:0009790]; embryo development ending in birth or egg hatching [GO:0009792]…	Exosome 3'-5' exoribonuclease complex, subunit PM/SCL-100 (Rrp6) [KOG2206]; Exosome component 10 protein [meNOG13199]; Ribonuclease D [COG0349]		NCoils: 0.03 (25/876); 0.04 (25/594)	SEG: 0.18 (104/594)	0.11	0.02	0.02	0.04	0.11	0.04	0.11	0.11	0.11	14.41	15.83	59.32	15.83	14.23	15.69
WBGene00000797	AH9.2	crn-4	0.03	0	2	0.03	0.01	0.01	0.02	0	0	0	0	2	0.75	0.5	1.25	1.6	0.38	0.25	0.62	1.6	protein	298 aa	298				RNase_T [PF00929.23]	3'-5' exonuclease activity [GO:0008408]; DNA catabolic process, endonucleolytic [GO:0000737]; DNA catabolic process, exonucleolytic [GO:0000738]; RNA catabolic process [GO:0006401]; apoptotic DNA fragmentation [GO:0006309]; apoptotic process [GO:0006915]; deoxyribonuclease activity [GO:0004536]; embryo development ending in birth or egg hatching [GO:0009792]; endodeoxyribonuclease activity [GO:00…	Histone pre-mRNA stem-loop binding protein [meNOG03328]; Inhibitor of the KinA pathway to sporulation, predicted exonuclease [COG5018]; Predicted exonuclease [KOG0542]				0.08	0.03	0.02	0.05	0.08	0.05	0.08	0.08	0.08	0.04	2.42	19.68	2.42	2.31	1.6
WBGene00000798	C14A4.5	crn-5	0.01	0	0	0	0	0	0.01	0	0	0	0	0	0	0	0	0.33	0.67	0.44	1.5	1.5	protein	214 aa	214				RNase_PH [PF01138.20]; RNase_PH_C [PF03725.14]	3'-5' exonuclease activity [GO:0008408]; RNA processing [GO:0006396]; apoptotic DNA fragmentation [GO:0006309]; apoptotic process [GO:0006915]; determination of adult lifespan [GO:0008340]; double-stranded DNA binding [GO:0003690]; enzyme binding [GO:0019899]; exosome (RNase complex) [GO:0000178]; nematode larval development [GO:0002119]; positive regulation of deoxyribonuclease activity [GO:0032…	Exosomal 3'-5' exoribonuclease complex, subunit Rrp46 [KOG1069]; Exosome component 5 protein [meNOG08366]; RNase PH [COG0689]				0.03	0.06	0.04	0.09	0.09	0.09	0.09	0.09	0.06	24.98	17.19	52.73	13.49	14.14	17.19
WBGene00000799	K04H4.6	crn-6	0.01	0.02	0.06	0	0.01	0.01	0.01	0.01	0.01	0.01	0.02	0.02	0.04	0.03	0.06	0.31	0.62	0.44	1.6	1.6	protein	373-378 aa	378				DNase_II [PF03265.14]	DNA catabolic process, endonucleolytic [GO:0000737]; DNA metabolic process [GO:0006259]; apoptotic DNA fragmentation [GO:0006309]; apoptotic process [GO:0006915]; deoxyribonuclease II activity [GO:0004531]	Deoxyribonuclease II [KOG3825]; Deoxyribonuclease II [meNOG04055]	SigP			0.05	0.1	0.07	0.16	0.16	0.16	0.16	0.16	0.1	2.57	11.64	9.19	9.94	10.12	11.64
WBGene00000800	Y23H5A.7	cars-1	0	0	0.18	0	0	0	0	0	0	0	0	0.06	0.15	0.09	0.18	0.33	0.83	0.5	1.2	1.2	protein	754-909 aa	909				tRNA-synt_1e [PF01406.18]; tRNA-synt_1g [PF09334.10]	ATP binding [GO:0005524]; aminoacyl-tRNA ligase activity [GO:0004812]; apoptotic process [GO:0006915]; cysteine-tRNA ligase activity [GO:0004817]; cysteinyl-tRNA aminoacylation [GO:0006423]; embryo development ending in birth or egg hatching [GO:0009792]; molting cycle, collagen and cuticulin-based cuticle [GO:0018996]; nematode larval development [GO:0002119]; nucleotide binding [GO:0000166]; re…	Cysteinyl-Trna synthetase [meNOG01385]; Cysteinyl-tRNA synthetase [COG0215]; Cysteinyl-tRNA synthetase [KOG2007]		NCoils: 0.04 (33/909); 0.04 (33/908); 0.04 (33/754)	SEG: 0.08 (71/909)	0.02	0.05	0.03	0.06	0.06	0.06	0.06	0.06	0.05	0.34	53.8	89.42	53.8	49.31	51.49
WBGene00000802	Y38A10A.5	crt-1	0	0	0.05	0	0	0	0	0	0	0	0	0.02	0.01	0.03	0.05	0.44	0.16	0.64	1.56	1.56	protein	395 aa	395	Housekeeping			Calreticulin [PF00262.17]	calcium ion binding [GO:0005509]; cytoplasm [GO:0005737]; defecation [GO:0030421]; endoplasmic reticulum [GO:0005783]; endoplasmic reticulum unfolded protein response [GO:0030968]; hemidesmosome assembly [GO:0031581]; locomotion [GO:0040011]; multicellular organismal reproductive process [GO:0048609]; nematode larval development [GO:0002119]; programmed cell death [GO:0012501]; protein binding [G…	Calreticulin [KOG0674]; Calreticulin protein [meNOG08619]	SigP	NCoils: 0.16 (62/395)	SEG: 0.18 (71/395)	0.11	0.04	0.16	0.25	0.25	0.25	0.25	0.25	0.16	4.84	1608.92	822.19	1470.11	1608.92	1583.11
WBGene00000803	F53H4.1	csb-1	0.01	0	0.06	0.01	0.01	0.01	0.01	0	0	0	0	0.06	0.06	0.06	0.06	1	1	1	1	1	protein	957 aa	957				Helicase_C [PF00271.30]; SNF2_N [PF00176.22]	ATP binding [GO:0005524]; DNA binding [GO:0003677]; UV protection [GO:0009650]; embryo development ending in birth or egg hatching [GO:0009792]	Excision repair cross-complementing rodent repair deficiency, complementation group 6 protein [meNOG04834]; Superfamily II DNA/RNA helicases, SNF2 family [COG0553]; Transcription-coupled repair protein CSB\/RAD26 (contains SNF2 family DNA-dependent ATPase domain) [KOG0387]		NCoils: 0.02 (21/957)	SEG: 0.11 (103/957)	0	0.01	0.01	0.01	0.01	0.01	0.01	0.01	0.01	0.18	0.9	10.02	0.72	0.82	0.9
WBGene00000804	Y48E1B.12	csc-1	0.05	0.02	0.07	0.05	0	0	0	0.02	0	0	0	0.07	0	0	0	16.58	0.06	0.02	0.03	16.58	protein	249 aa	249					body morphogenesis [GO:0010171]; condensed chromosome [GO:0000793]; condensed nuclear chromosome [GO:0000794]; cytokinesis [GO:0000910]; embryo development ending in birth or egg hatching [GO:0009792]; meiotic chromosome segregation [GO:0045132]; meiotic spindle midzone [GO:1990385]; mitotic chromosome movement towards spindle pole [GO:0007079]; mitotic cleavage furrow ingression [GO:1990386]; mi…			NCoils: 0.13 (32/249)	SEG: 0.11 (28/249)	1.99	0.12	0.03	0.06	1.99	0.12	1.99	1.99	1.99	26.61	43.34	90.91	43.34	33.82	32.23
WBGene00000812	Y48G1C.2	csk-1	0.05	0.02	0.88	0.02	0.03	0.02	0.05	0.01	0.01	0.01	0.02	0.32	0.54	0.39	0.88	0.37	0.61	0.44	1.64	1.64	protein	43-624 aa	624				Pkinase [PF00069.24]; Pkinase_Tyr [PF07714.16]; SH2 [PF00017.23]	cell-cell junction [GO:0005911]; embryo development ending in birth or egg hatching [GO:0009792]; larval feeding behavior [GO:0030536]; muscle fiber development [GO:0048747]; nematode larval development [GO:0002119]; pharyngeal pumping [GO:0043050]; phosphatidylinositol 3-kinase complex [GO:0005942]; phosphatidylinositol 3-kinase regulator activity [GO:0035014]; plasma membrane [GO:0005886]; prot…	Serine/threonine protein kinase [COG0515]; Tyrosine kinase [meNOG10000]; Tyrosine kinases [KOG0197]			SEG: 0.14 (88/624)	0.5	0.83	0.6	1.36	1.36	1.36	1.36	1.36	0.83	1.55	27.01	61.46	27.01	13.03	13.48
[truncated: 44,502 more rows]
[truncated: 25 more columns]

## Sheet: Protein-coding
Wormbase ID	Transcript	Gene Name	CEM_all.max_TPM/male.max_TPM	CEM_all.max_TPM/female.max_TPM	CEM_all.max_TPM/larvae_TPM	CEM_DL_TPM/male.max_TPM	CEM_DR_TPM/male.max_TPM	CEM_VL_TPM/male.max_TPM	CEM_VR_TPM/male.max_TPM	CEM_DL_TPM/female.max_TPM	CEM_DR_TPM/female.max_TPM	CEM_VL_TPM/female.max_TPM	CEM_VR_TPM/female.max_TPM	CEM_DL_TPM/larvae_TPM	CEM_DR_TPM/larvae_TPM	CEM_VL_TPM/larvae_TPM	CEM_VR_TPM/larvae_TPM	CEM_DL_TPM/CEM_non_DL.max_TPM	CEM_DR_TPM/CEM_non_DR.max_TPM	CEM_VL_TPM/CEM_non_VL.max_TPM	CEM_VR_TPM/CEM_non_VR.max_TPM	CEM_any/CEM_non_any.max	Coding	Prot_size	Max_prot_size	Housekeeping	TF	7TM_GPCRs	PFAM	GO_term	eggNOG	Phobius	NCoils	Psegs	CEM_DL_TPM	CEM_DR_TPM	CEM_VL_TPM	CEM_VR_TPM	CEM_all.max_TPM	CEM_non_DL.max_TPM	CEM_non_DR.max_TPM	CEM_non_VL.max_TPM	CEM_non_VR.max_TPM	larvae_TPM	male.max_TPM	female.max_TPM	male.1_TPM	male.2_TPM	male.3_TPM
[truncated: 20,447 more rows]
[truncated: 25 more columns]

[truncated: 10 more sheets: CEM-specific, CEM DL-enriched, CEM DL-specific, CEM DR-enriched, CEM DR-specific, CEM VL-enriched, CEM VL-specific, CEM VR-enriched, CEM VR-specific, Pseudozeroed TPMs]
